# Supplementary material for: De Novo Assembly and Characterization of Pericarp Transcriptome and Identification of Candidate Genes Mediating Fruit Cracking in Litchi chinensis Sonn
Source: Int J Mol Sci. 2014 Sep 30;15(10):17667–85. doi: 10.3390/ijms151017667 (PMC4227183; doi:10.3390/ijms151017667)
Supplement: Supplementary File 1 [file ijms-15-17667-s001.xls]

## Sheet: Table S1
Table S1. The overall functional annotation.
geneID	geneLength	BTYbulie_rawreads(18429717)	BTYbulie_RPKM	BTYlie_rawreads(20867730)	BTYlie_RPKM	Nr-ID	Nr-Score	Nr-Evalue	Nr-annotation	Swissprot-ID	Swissprot-Score	Swissprot-Evalue	Swissprot-annotation	COG-Protein-or-Domain	COG-Score	COG-Evalue	COG-ID	COG-Function-Description	KO_id	KEGG-Evalue	KEGG-Score	KEGG-Gene	ko_definition	GO-BiologicalProcess	GO-MolecularFunction	Go-CellularComponent
Unigene0000001	208	4	1.0435	1	0.2304	--	--	--	--	--	--	--	--	--	--	--	--	--	--	--	--	--	--	-	-	-
Unigene0000002	255	5	1.0639	4	0.7517	--	--	--	--	--	--	--	--	--	--	--	--	--	--	--	--	--	--	-	-	-
Unigene0000003	324	17	2.847	3	0.4437	--	--	--	--	--	--	--	--	--	--	--	--	--	--	--	--	--	--	-	-	-
Unigene0000004	392	11	1.5226	4	0.489	--	--	--	--	--	--	--	--	--	--	--	--	--	--	--	--	--	--	-	-	-
Unigene0000005	242	4	0.8969	1	0.198	--	--	--	--	--	--	--	--	--	--	--	--	--	--	--	--	--	--	-	-	-
Unigene0000006	203	6	1.6037	3	0.7082	--	--	--	--	--	--	--	--	--	--	--	--	--	--	--	--	--	--	-	-	-
Unigene0000007	227	7	1.6732	3	0.6333	--	--	--	--	--	--	--	--	--	--	--	--	--	--	--	--	--	--	-	-	-
Unigene0000008	370	14	2.0531	0	0	gi|359482602|ref|XP_003632791.1|	67	1e-10	PREDICTED: G-type lectin S-receptor-like serine/threonine-protein kinase CES101-like [Vitis vinifera]	sp|Q9ZT07|RKS1_ARATH	53.5	4e-07	G-type lectin S-receptor-like serine/threonine-protein kinase RKS1 OS=Arabidopsis thaliana GN=RKS1 PE=2 SV=3	--	--	--	--	--	--	--	--	--	--	-	GO:0016301//kinase activity	-
Unigene0000009	204	3	0.7979	0	0	--	--	--	--	--	--	--	--	--	--	--	--	--	--	--	--	--	--	-	-	-
Unigene0000010	247	4	0.8787	1	0.194	--	--	--	--	--	--	--	--	--	--	--	--	--	--	--	--	--	--	-	-	-
Unigene0000011	256	7	1.4837	5	0.936	--	--	--	--	--	--	--	--	--	--	--	--	--	--	--	--	--	--	-	-	-
Unigene0000012	238	5	1.1399	0	0	--	--	--	--	--	--	--	--	--	--	--	--	--	--	--	--	--	--	-	-	-
Unigene0000013	225	4	0.9646	3	0.6389	--	--	--	--	--	--	--	--	--	--	--	--	--	--	--	--	--	--	-	-	-
Unigene0000014	206	3	0.7902	0	0	--	--	--	--	--	--	--	--	--	--	--	--	--	--	--	--	--	--	-	-	-
Unigene0000015	321	12	2.0284	3	0.4479	gi|470124860|ref|XP_004298427.1|	121	4e-27	PREDICTED: (R)-mandelonitrile lyase-like [Fragaria vesca subsp. vesca]	sp|P52707|MDL3_PRUSE	64.3	2e-10	(R)-mandelonitrile lyase 3 OS=Prunus serotina GN=MDL3 PE=2 SV=1	BMEI0028	54.3	5e-08	COG2303	Choline dehydrogenase and related flavoproteins	--	--	--	--	--	GO:0008152//metabolic process	GO:0016614//oxidoreductase activity, acting on CH-OH group of donors;GO:0016832//aldehyde-lyase activity	GO:0031410//cytoplasmic vesicle
Unigene0000016	206	8	2.1072	2	0.4653	gi|508710006|gb|EOY01903.1|	99	3e-20	Glucose-methanol-choline oxidoreductase family protein isoform 2 [Theobroma cacao]	--	--	--	--	--	--	--	--	--	--	--	--	--	--	GO:0044281//small molecule metabolic process	GO:0016614//oxidoreductase activity, acting on CH-OH group of donors;GO:0050662//coenzyme binding;GO:0016832//aldehyde-lyase activity	-
Unigene0000017	229	6	1.4217	1	0.2093	gi|224123144|ref|XP_002319005.1|	56.2	2e-07	predicted protein [Populus trichocarpa]	--	--	--	--	--	--	--	--	--	--	--	--	--	--	GO:0006796//phosphate-containing compound metabolic process	GO:0016301//kinase activity	-
Unigene0000018	210	9	2.3254	7	1.5974	gi|356520497|ref|XP_003528898.1|	60.1	2e-08	PREDICTED: glyoxylate reductase-like [Glycine max]	sp|Q9LE33|HPR3_ARATH	58.5	1e-08	Glyoxylate/hydroxypyruvate reductase HPR3 OS=Arabidopsis thaliana GN=HPR3 PE=2 SV=1	--	--	--	--	--	--	--	--	--	--	GO:0008152//metabolic process	GO:0016616//oxidoreductase activity, acting on the CH-OH group of donors, NAD or NADP as acceptor;GO:0000166//nucleotide binding	-
Unigene0000019	210	2	0.5168	0	0	--	--	--	--	--	--	--	--	--	--	--	--	--	--	--	--	--	--	-	-	-
Unigene0000020	475	24	2.7416	3	0.3027	gi|449479933|ref|XP_004155750.1|	223	9e-58	PREDICTED: uncharacterized LOC101211160 [Cucumis sativus]	--	--	--	--	--	--	--	--	--	--	--	--	--	--	-	-	GO:0043231//intracellular membrane-bounded organelle
Unigene0000021	218	6	1.4934	2	0.4396	--	--	--	--	--	--	--	--	--	--	--	--	--	--	--	--	--	--	-	-	-
Unigene0000022	215	5	1.2619	2	0.4458	gi|225450466|ref|XP_002280231.1|	114	7e-25	PREDICTED: pleiotropic drug resistance protein 3-like [Vitis vinifera]	sp|Q5W274|PDR3_TOBAC	99.4	6e-21	Pleiotropic drug resistance protein 3 OS=Nicotiana tabacum GN=PDR3 PE=2 SV=1	YDR011w_3	50.4	8e-07	COG1131	ABC-type multidrug transport system, ATPase component	--	--	--	--	--	GO:0060918//auxin transport;GO:0071365//cellular response to auxin stimulus;GO:0009207;GO:0048513//organ development	GO:0017111//nucleoside-triphosphatase activity;GO:0015604//organic phosphonate transmembrane transporter activity;GO:0032559	GO:0016020//membrane
Unigene0000023	249	6	1.3075	1	0.1925	gi|508719848|gb|EOY11745.1|	141	5e-33	Pleiotropic drug resistance 9 [Theobroma cacao]	sp|Q9ZUT8|AB33G_ARATH	126	4e-29	ABC transporter G family member 33 OS=Arabidopsis thaliana GN=ABCG33 PE=2 SV=1	--	--	--	--	--	--	--	--	--	--	GO:0060918//auxin transport;GO:0071365//cellular response to auxin stimulus;GO:0009207;GO:0048513//organ development	GO:0017111//nucleoside-triphosphatase activity;GO:0015604//organic phosphonate transmembrane transporter activity;GO:0032559	GO:0016020//membrane
Unigene0000024	267	4	0.8129	2	0.359	--	--	--	--	--	--	--	--	--	--	--	--	--	--	--	--	--	--	-	-	-
Unigene0000025	201	6	1.6197	2	0.4768	gi|224121478|ref|XP_002318592.1|	80.9	8e-15	chromatin remodeling complex subunit [Populus trichocarpa]	--	--	--	--	--	--	--	--	--	--	--	--	--	--	-	GO:0003676//nucleic acid binding;GO:0016787//hydrolase activity	-
Unigene0000026	211	6	1.5429	1	0.2271	--	--	--	--	--	--	--	--	--	--	--	--	--	--	--	--	--	--	-	-	-
Unigene0000027	207	5	1.3106	0	0	--	--	--	--	--	--	--	--	--	--	--	--	--	--	--	--	--	--	-	-	-
Unigene0000028	275	1	0.1973	0	0	--	--	--	--	--	--	--	--	--	--	--	--	--	--	--	--	--	--	-	-	-
Unigene0000029	367	4	0.5914	0	0	gi|359481267|ref|XP_002264433.2|	138	3e-32	PREDICTED: MATE efflux family protein 2, chloroplastic [Vitis vinifera]	sp|Q84K71|MATE2_ARATH	112	6e-25	MATE efflux family protein 2, chloroplastic OS=Arabidopsis thaliana GN=DTX44 PE=2 SV=1	MTH314	54.7	4e-08	COG0534	Na+-driven multidrug efflux pump	--	--	--	--	--	GO:0015893//drug transport	GO:0015291//secondary active transmembrane transporter activity	GO:0043231//intracellular membrane-bounded organelle
Unigene0000030	438	13	1.6105	3	0.3282	gi|359481267|ref|XP_002264433.2|	241	5e-63	PREDICTED: MATE efflux family protein 2, chloroplastic [Vitis vinifera]	sp|Q84K71|MATE2_ARATH	191	2e-48	MATE efflux family protein 2, chloroplastic OS=Arabidopsis thaliana GN=DTX44 PE=2 SV=1	Rv2836c	64.7	5e-11	COG0534	Na+-driven multidrug efflux pump	--	--	--	--	--	GO:0015893//drug transport	GO:0015291//secondary active transmembrane transporter activity	-
Unigene0000031	221	5	1.2276	0	0	--	--	--	--	--	--	--	--	--	--	--	--	--	--	--	--	--	--	-	-	-
Unigene0000032	757	30	2.1503	13	0.8229	gi|449484398|ref|XP_004156871.1|	139	9e-32	PREDICTED: uncharacterized LOC101221253 [Cucumis sativus]	sp|Q01033|VG48_SHV21	62.8	3e-09	Uncharacterized gene 48 protein OS=Saimiriine herpesvirus 2 (strain 11) GN=48 PE=3 SV=1	YOR054c	53.9	3e-07	COG0452	Phosphopantothenoylcysteine synthetase/decarboxylase	--	--	--	--	--	-	-	-
Unigene0000033	261	4	0.8316	1	0.1836	--	--	--	--	--	--	--	--	--	--	--	--	--	--	--	--	--	--	-	-	-
Unigene0000034	212	3	0.7678	1	0.226	--	--	--	--	--	--	--	--	--	--	--	--	--	--	--	--	--	--	-	-	-
Unigene0000035	235	4	0.9236	4	0.8157	gi|508715752|gb|EOY07649.1|	137	1e-31	Endomembrane-type CA-ATPase 4 isoform 2 [Theobroma cacao]	sp|Q9XES1|ECA4_ARATH	131	1e-30	Calcium-transporting ATPase 4, endoplasmic reticulum-type OS=Arabidopsis thaliana GN=ECA4 PE=2 SV=2	SMa1155	49.3	2e-06	COG0474	Cation transport ATPase	K01537	7e-32	135	vvi:100248326	Ca2+-transporting ATPase [EC:3.6.3.8]	GO:0010038//response to metal ion;GO:0009206;GO:0000041//transition metal ion transport;GO:0030003//cellular cation homeostasis;GO:0070838//divalent metal ion transport	GO:0043169//cation binding;GO:0019829//cation-transporting ATPase activity;GO:0032559	GO:0031227//intrinsic to endoplasmic reticulum membrane
Unigene0000036	292	12	2.2299	2	0.3282	gi|224067150|ref|XP_002302380.1|	155	3e-37	1-aminocyclopropane-1-carboxylate [Populus trichocarpa]	sp|Q9T065|1A18_ARATH	138	1e-32	1-aminocyclopropane-1-carboxylate synthase 8 OS=Arabidopsis thaliana GN=ACS8 PE=1 SV=1	CAC1819	64.3	5e-11	COG0436	Aspartate/tyrosine/aromatic aminotransferase	K01762	5e-38	155	pop:POPTR_754872	1-aminocyclopropane-1-carboxylate synthase [EC:4.4.1.14]	GO:0010608//posttranscriptional regulation of gene expression;GO:0009725//response to hormone stimulus;GO:0009692;GO:0008652//cellular amino acid biosynthetic process	GO:0016769//transferase activity, transferring nitrogenous groups;GO:0005515//protein binding;GO:0016846//carbon-sulfur lyase activity;GO:0048037//cofactor binding	GO:0044424//intracellular part
Unigene0000037	316	6	1.0303	4	0.6066	--	--	--	--	--	--	--	--	--	--	--	--	--	--	--	--	--	--	-	-	-
Unigene0000038	203	3	0.8019	0	0	gi|508703784|gb|EOX95680.1|	121	4e-27	Auxin response factor 11 isoform 2 [Theobroma cacao]	sp|Q9C5W9|ARFR_ARATH	111	1e-24	Auxin response factor 18 OS=Arabidopsis thaliana GN=ARF18 PE=2 SV=1	--	--	--	--	--	--	--	--	--	--	GO:0010468//regulation of gene expression;GO:0009755//hormone-mediated signaling pathway;GO:0032774	GO:0003676//nucleic acid binding;GO:0001071//nucleic acid binding transcription factor activity;GO:0005515//protein binding	GO:0043231//intracellular membrane-bounded organelle
Unigene0000039	224	4	0.9689	0	0	gi|508775004|gb|EOY22260.1|	86.3	2e-16	P-loop containing nucleoside triphosphate hydrolases superfamily protein isoform 2 [Theobroma cacao]	sp|Q9LIH9|RH51_ARATH	64.7	2e-10	DEAD-box ATP-dependent RNA helicase 51 OS=Arabidopsis thaliana GN=RH51 PE=2 SV=1	SPAC1F7.02c	51.6	3e-07	COG0513	Superfamily II DNA and RNA helicases	K13179	2e-16	83.6	vvi:100242258	ATP-dependent RNA helicase DDX18/HAS1 [EC:3.6.4.13]	-	GO:0042623//ATPase activity, coupled;GO:0032559	GO:0043232
Unigene0000040	219	6	1.4866	0	0	--	--	--	--	--	--	--	--	--	--	--	--	--	--	--	--	--	--	-	-	-
Unigene0000041	204	4	1.0639	2	0.4698	gi|502089135|ref|XP_004488827.1|	85.5	8e-20	PREDICTED: eukaryotic translation initiation factor 2 subunit 3-like isoform X1 [Cicer arietinum]	sp|Q24208|IF2G_DROME	77	4e-15	Eukaryotic translation initiation factor 2 subunit 3 OS=Drosophila melanogaster GN=Su(var)3-9 PE=2 SV=1	SPBC17G9.09	76.3	8e-16	COG5257	Translation initiation factor 2, gamma subunit (eIF-2gamma; GTPase)	K03242	3e-20	85.5	vvi:100252857	translation initiation factor 2 subunit 3	GO:0009207	GO:0017111//nucleoside-triphosphatase activity;GO:0008135//translation factor activity, nucleic acid binding;GO:0032561//guanyl ribonucleotide binding	GO:0044444//cytoplasmic part
Unigene0000042	205	5	1.3234	9	2.1038	gi|502089140|ref|XP_004488828.1|	121	6e-27	PREDICTED: eukaryotic translation initiation factor 2 subunit 3-like isoform X2 [Cicer arietinum]	sp|Q9Z0N2|IF2H_MOUSE	97.4	2e-20	Eukaryotic translation initiation factor 2 subunit 3, Y-linked OS=Mus musculus GN=Eif2s3y PE=2 SV=2	YER025w_2	92	2e-19	COG5257	Translation initiation factor 2, gamma subunit (eIF-2gamma; GTPase)	K03242	7e-27	118	rcu:RCOM_0727700	translation initiation factor 2 subunit 3	GO:0009207	GO:0008135//translation factor activity, nucleic acid binding;GO:0032561//guanyl ribonucleotide binding;GO:0017111//nucleoside-triphosphatase activity	-
Unigene0000043	325	9	1.5026	0	0	--	--	--	--	--	--	--	--	--	--	--	--	--	--	--	--	--	--	-	-	-
Unigene0000044	217	0	0	0	0	--	--	--	--	--	--	--	--	--	--	--	--	--	--	--	--	--	--	-	-	-
Unigene0000045	259	5	1.0475	0	0	gi|224132258|ref|XP_002328224.1|	71.6	5e-12	cc-nbs-lrr resistance protein [Populus trichocarpa]	--	--	--	--	--	--	--	--	--	--	--	--	--	--	-	-	-
Unigene0000046	227	6	1.4342	1	0.2111	--	--	--	--	--	--	--	--	--	--	--	--	--	--	--	--	--	--	-	-	-
Unigene0000047	426	16	2.0379	4	0.45	--	--	--	--	--	--	--	--	--	--	--	--	--	--	--	--	--	--	-	-	-
Unigene0000048	281	7	1.3517	1	0.1705	--	--	--	--	--	--	--	--	--	--	--	--	--	--	--	--	--	--	-	-	-
Unigene0000049	327	9	1.4934	2	0.2931	gi|470131410|ref|XP_004301588.1|	72.4	3e-12	PREDICTED: probable leucine-rich repeat receptor-like protein kinase At5g49770-like [Fragaria vesca subsp. vesca]	sp|Q9LT96|Y5977_ARATH	54.7	2e-07	Probable leucine-rich repeat receptor-like protein kinase At5g49770 OS=Arabidopsis thaliana GN=At5g49770 PE=2 SV=1	--	--	--	--	--	--	--	--	--	--	GO:0016310//phosphorylation;GO:0006464//protein modification process	GO:0004672//protein kinase activity;GO:0032559	-
Unigene0000050	287	16	3.025	2	0.3339	gi|470128232|ref|XP_004300050.1|	153	1e-36	PREDICTED: probable leucine-rich repeat receptor-like protein kinase At5g49770-like [Fragaria vesca subsp. vesca]	sp|Q9LT96|Y5977_ARATH	133	4e-31	Probable leucine-rich repeat receptor-like protein kinase At5g49770 OS=Arabidopsis thaliana GN=At5g49770 PE=2 SV=1	--	--	--	--	--	--	--	--	--	--	GO:0006468//protein phosphorylation;GO:0007243//intracellular protein kinase cascade	GO:0016628//oxidoreductase activity, acting on the CH-CH group of donors, NAD or NADP as acceptor;GO:0032559;GO:0004702//receptor signaling protein serine/threonine kinase activity	GO:0031224//intrinsic to membrane
Unigene0000051	475	14	1.5992	6	0.6053	gi|90265044|emb|CAH67640.1|	69.7	2e-11	H0102C09.1 [Oryza sativa Indica Group]	--	--	--	--	--	--	--	--	--	--	--	--	--	--	-	GO:0005488//binding	-
Unigene0000052	252	6	1.2919	0	0	--	--	--	--	--	--	--	--	--	--	--	--	--	--	--	--	--	--	-	-	-
Unigene0000053	235	2	0.4618	0	0	--	--	--	--	--	--	--	--	--	--	--	--	--	--	--	--	--	--	-	-	-
Unigene0000054	646	19	1.5959	14	1.0385	gi|115481620|ref|NP_001064403.1|	97.8	2e-19	Os10g0348600 [Oryza sativa Japonica Group]	--	--	--	--	--	--	--	--	--	--	--	--	--	--	-	-	-
Unigene0000055	215	3	0.7571	0	0	gi|225455922|ref|XP_002276124.1|	109	2e-23	PREDICTED: lysM domain-containing GPI-anchored protein 1-like [Vitis vinifera]	sp|Q93ZH0|LYM1_ARATH	70.9	2e-12	LysM domain-containing GPI-anchored protein 1 OS=Arabidopsis thaliana GN=LYM1 PE=1 SV=1	--	--	--	--	--	--	--	--	--	--	GO:0002376//immune system process;GO:0009056//catabolic process	GO:0005539//glycosaminoglycan binding	GO:0031225//anchored to membrane
Unigene0000056	268	4	0.8099	8	1.4305	--	--	--	--	--	--	--	--	--	--	--	--	--	--	--	--	--	--	-	-	-
Unigene0000057	229	8	1.8956	0	0	gi|326498211|dbj|BAJ98533.1|	89.7	2e-17	predicted protein [Hordeum vulgare subsp. vulgare]	sp|P87252|HEX1_NEUCR	108	1e-23	Woronin body major protein OS=Neurospora crassa (strain ATCC 24698 / 74-OR23-1A / CBS 708.71 / DSM 1257 / FGSC 987) GN=hex-1 PE=1 SV=1	--	--	--	--	--	--	--	--	--	--	GO:0006448//regulation of translational elongation;GO:0006449//regulation of translational termination;GO:0018205//peptidyl-lysine modification	GO:0043021//ribonucleoprotein complex binding;GO:0008135//translation factor activity, nucleic acid binding	-
Unigene0000058	240	5	1.1304	0	0	gi|384245063|gb|EIE18559.1|	109	2e-23	HSP90-domain-containing protein [Coccomyxa subellipsoidea C-169]	sp|P40292|HSP90_ASPFU	147	2e-35	Heat shock protein 90 OS=Neosartorya fumigata (strain ATCC MYA-4609 / Af293 / CBS 101355 / FGSC A1100) GN=hsp90 PE=1 SV=3	YPL240c	132	1e-31	COG0326	Molecular chaperone, HSP90 family	K04079	2e-23	107	vcn:VOLCADRAFT_73112	molecular chaperone HtpG	GO:0050896//response to stimulus;GO:0044267//cellular protein metabolic process	GO:0005515//protein binding;GO:0032559	GO:0043231//intracellular membrane-bounded organelle
Unigene0000059	256	3	0.6359	1	0.1872	--	--	--	--	--	--	--	--	--	--	--	--	--	--	--	--	--	--	-	-	-
Unigene0000060	223	5	1.2166	0	0	--	--	--	--	--	--	--	--	--	--	--	--	--	--	--	--	--	--	-	-	-
Unigene0000061	305	12	2.1348	4	0.6285	--	--	--	--	--	--	--	--	--	--	--	--	--	--	--	--	--	--	-	-	-
Unigene0000062	204	4	1.0639	2	0.4698	gi|186509871|ref|NP_187362.3|	70.9	9e-12	NHL domain-containing protein [Arabidopsis thaliana]	--	--	--	--	--	--	--	--	--	--	--	--	--	--	-	-	GO:0005622//intracellular
Unigene0000063	378	7	1.0048	2	0.2535	--	--	--	--	--	--	--	--	--	--	--	--	--	--	--	--	--	--	-	-	-
Unigene0000064	498	18	1.9612	2	0.1925	gi|359495513|ref|XP_003635008.1|	109	3e-23	PREDICTED: DNA replication licensing factor MCM6 [Vitis vinifera]	--	--	--	--	--	--	--	--	--	K02542	1e-23	108	rcu:RCOM_0133060	minichromosome maintenance protein 6	GO:0032508//DNA duplex unwinding	GO:0003676//nucleic acid binding;GO:0042623//ATPase activity, coupled;GO:0032559	GO:0043231//intracellular membrane-bounded organelle
Unigene0000065	570	11	1.0471	0	0	gi|359480978|ref|XP_003632548.1|	226	2e-58	PREDICTED: probable LRR receptor-like serine/threonine-protein kinase At5g37450-like [Vitis vinifera]	sp|C0LGU1|Y5374_ARATH	149	1e-35	Probable LRR receptor-like serine/threonine-protein kinase At5g37450 OS=Arabidopsis thaliana GN=At5g37450 PE=2 SV=1	--	--	--	--	--	--	--	--	--	--	GO:0016310//phosphorylation;GO:0006464//protein modification process	GO:0004672//protein kinase activity;GO:0000166//nucleotide binding	GO:0044464//cell part;GO:0016020//membrane
Unigene0000066	534	18	1.829	5	0.4487	gi|359480978|ref|XP_003632548.1|	215	3e-55	PREDICTED: probable LRR receptor-like serine/threonine-protein kinase At5g37450-like [Vitis vinifera]	sp|C0LGD7|Y1684_ARATH	183	5e-46	Probable LRR receptor-like serine/threonine-protein kinase At1g06840 OS=Arabidopsis thaliana GN=At1g06840 PE=1 SV=2	ECU09g0200	48.9	5e-06	COG4886	Leucine-rich repeat (LRR) protein	--	--	--	--	--	-	GO:0016772//transferase activity, transferring phosphorus-containing groups	GO:0031410//cytoplasmic vesicle
Unigene0000067	201	6	1.6197	0	0	--	--	--	--	--	--	--	--	--	--	--	--	--	--	--	--	--	--	-	-	-
Unigene0000068	304	11	1.9634	4	0.6305	--	--	--	--	--	--	--	--	--	--	--	--	--	--	--	--	--	--	-	-	-
Unigene0000069	257	10	2.1113	1	0.1865	gi|460377635|ref|XP_004234596.1|	65.1	5e-10	PREDICTED: aspartic proteinase-like protein 1-like [Solanum lycopersicum]	--	--	--	--	--	--	--	--	--	--	--	--	--	--	-	GO:0008233//peptidase activity	-
Unigene0000070	211	6	1.5429	2	0.4542	gi|357483859|ref|XP_003612216.1|	132	2e-30	Atfp6-like protein [Medicago truncatula]	sp|Q9SZN7|HIP26_ARATH	110	2e-24	Heavy metal-associated isoprenylated plant protein 26 OS=Arabidopsis thaliana GN=HIPP26 PE=1 SV=1	--	--	--	--	--	--	--	--	--	--	GO:0006812//cation transport	GO:0043169//cation binding	-
Unigene0000071	409	3	0.398	2	0.2343	--	--	--	--	--	--	--	--	--	--	--	--	--	--	--	--	--	--	-	-	-
Unigene0000072	421	9	1.16	2	0.2277	--	--	--	--	--	--	--	--	--	--	--	--	--	--	--	--	--	--	-	-	-
Unigene0000073	699	27	2.0959	7	0.4799	gi|502168580|ref|XP_004514420.1|	70.5	3e-11	PREDICTED: protein RKD1-like [Cicer arietinum]	sp|P10978|POLX_TOBAC	63.9	1e-09	Retrovirus-related Pol polyprotein from transposon TNT 1-94 OS=Nicotiana tabacum PE=2 SV=1	--	--	--	--	--	--	--	--	--	--	GO:0006259//DNA metabolic process	GO:0046914//transition metal ion binding;GO:0008289//lipid binding	-
Unigene0000074	208	3	0.7826	1	0.2304	--	--	--	--	--	--	--	--	--	--	--	--	--	--	--	--	--	--	-	-	-
Unigene0000075	207	3	0.7864	3	0.6945	--	--	--	--	--	--	--	--	--	--	--	--	--	--	--	--	--	--	-	-	-
Unigene0000076	230	4	0.9437	0	0	--	--	--	--	sp|Q7Z1F8|ARY_ANTPE	85.1	1e-16	Arylphorin OS=Antheraea pernyi PE=1 SV=1	--	--	--	--	--	--	--	--	--	--	-	-	-
Unigene0000077	303	7	1.2535	2	0.3163	--	--	--	--	--	--	--	--	--	--	--	--	--	--	--	--	--	--	-	-	-
Unigene0000078	230	4	0.9437	2	0.4167	gi|118340979|gb|ABK80758.1|	57	1e-07	7S globulin precursor [Ficus pumila var. awkeotsang]	--	--	--	--	--	--	--	--	--	--	--	--	--	--	-	-	-
Unigene0000079	215	3	0.7571	1	0.2229	--	--	--	--	--	--	--	--	--	--	--	--	--	--	--	--	--	--	-	-	-
Unigene0000080	291	8	1.4917	2	0.3294	--	--	--	--	--	--	--	--	--	--	--	--	--	--	--	--	--	--	-	-	-
Unigene0000081	239	7	1.5892	2	0.401	--	--	--	--	--	--	--	--	--	--	--	--	--	--	--	--	--	--	-	-	-
Unigene0000082	475	15	1.7135	0	0	gi|449016469|dbj|BAM79871.1|	252	2e-66	40S ribosomal protein S4 [Cyanidioschyzon merolae strain 10D]	sp|Q5UAP0|RS4_BOMMO	311	1e-84	40S ribosomal protein S4 OS=Bombyx mori GN=RpS4 PE=2 SV=1	SPBC19F8.08	253	1e-67	COG1471	Ribosomal protein S4E	K02987	6e-67	252	cme:CMH218C	small subunit ribosomal protein S4e	GO:0034645//cellular macromolecule biosynthetic process;GO:0042221//response to chemical stimulus	GO:0003723//RNA binding;GO:0005198//structural molecule activity	GO:0016020//membrane;GO:0009536//plastid;GO:0044391
Unigene0000083	209	3	0.7789	1	0.2293	--	--	--	--	--	--	--	--	--	--	--	--	--	--	--	--	--	--	-	-	-
Unigene0000084	469	19	2.1982	10	1.0218	--	--	--	--	--	--	--	--	--	--	--	--	--	--	--	--	--	--	-	-	-
Unigene0000085	203	5	1.3365	0	0	gi|359478621|ref|XP_002274420.2|	71.2	7e-12	PREDICTED: UDP-glycosyltransferase 87A2-like [Vitis vinifera]	sp|O64733|U87A2_ARATH	63.9	3e-10	UDP-glycosyltransferase 87A2 OS=Arabidopsis thaliana GN=UGT87A2 PE=2 SV=1	--	--	--	--	--	--	--	--	--	--	-	GO:0016757//transferase activity, transferring glycosyl groups	GO:0044444//cytoplasmic part
Unigene0000086	440	9	1.1099	2	0.2178	--	--	--	--	--	--	--	--	--	--	--	--	--	--	--	--	--	--	-	-	-
Unigene0000087	243	5	1.1165	2	0.3944	--	--	--	--	--	--	--	--	--	--	--	--	--	--	--	--	--	--	-	-	-
Unigene0000088	206	3	0.7902	3	0.6979	gi|317106708|dbj|BAJ53208.1|	68.2	6e-11	JHL06B08.10 [Jatropha curcas]	--	--	--	--	--	--	--	--	--	--	--	--	--	--	-	-	-
Unigene0000089	262	11	2.2781	5	0.9145	--	--	--	--	--	--	--	--	--	--	--	--	--	--	--	--	--	--	-	-	-
Unigene0000090	248	7	1.5315	1	0.1932	--	--	--	--	--	--	--	--	--	--	--	--	--	--	--	--	--	--	-	-	-
Unigene0000091	204	3	0.7979	4	0.9396	--	--	--	--	--	--	--	--	--	--	--	--	--	--	--	--	--	--	-	-	-
Unigene0000092	254	3	0.6409	4	0.7547	--	--	--	--	--	--	--	--	--	--	--	--	--	--	--	--	--	--	-	-	-
Unigene0000093	454	17	2.0318	2	0.2111	gi|470127788|ref|XP_004299842.1|	292	2e-78	PREDICTED: receptor-like protein kinase HSL1-like [Fragaria vesca subsp. vesca]	sp|P47735|RLK5_ARATH	186	5e-47	Receptor-like protein kinase 5 OS=Arabidopsis thaliana GN=RLK5 PE=1 SV=1	BS_yloP_1	81.3	6e-16	COG0515	Serine/threonine protein kinase	--	--	--	--	--	GO:0006468//protein phosphorylation;GO:0007243//intracellular protein kinase cascade	GO:0016628//oxidoreductase activity, acting on the CH-CH group of donors, NAD or NADP as acceptor;GO:0032559;GO:0004702//receptor signaling protein serine/threonine kinase activity	GO:0031224//intrinsic to membrane
Unigene0000094	441	18	2.2147	7	0.7606	--	--	--	--	--	--	--	--	--	--	--	--	--	--	--	--	--	--	-	-	-
Unigene0000095	268	0	0	0	0	gi|508708344|gb|EOY00241.1|	132	3e-30	Galactosyltransferase family protein isoform 1 [Theobroma cacao]	sp|Q8GXG6|B3GTH_ARATH	124	1e-28	Probable beta-1,3-galactosyltransferase 17 OS=Arabidopsis thaliana GN=B3GALT17 PE=2 SV=2	--	--	--	--	--	--	--	--	--	--	GO:0006464//protein modification process	GO:0030246//carbohydrate binding;GO:0035250//UDP-galactosyltransferase activity	GO:0031224//intrinsic to membrane;GO:0009536//plastid
Unigene0000096	488	6	0.6671	3	0.2946	gi|297746292|emb|CBI16348.3|	62.8	3e-09	unnamed protein product [Vitis vinifera]	--	--	--	--	--	--	--	--	--	--	--	--	--	--	-	-	-
Unigene0000097	233	4	0.9315	3	0.617	gi|508787177|gb|EOY34433.1|	150	9e-36	Cysteine proteinases superfamily protein [Theobroma cacao]	sp|Q54P70|Y4757_DICDI	67	4e-11	OTU domain-containing protein DDB_G0284757 OS=Dictyostelium discoideum GN=DDB_G0284757 PE=1 SV=2	--	--	--	--	--	--	--	--	--	--	-	-	-
Unigene0000098	256	8	1.6956	5	0.936	--	--	--	--	--	--	--	--	--	--	--	--	--	--	--	--	--	--	-	-	-
Unigene0000099	304	5	0.8924	6	0.9458	gi|224135651|ref|XP_002327271.1|	133	1e-30	proton-dependent oligopeptide transporter [Populus trichocarpa]	sp|Q8VZE2|PTR22_ARATH	106	5e-23	Probable peptide/nitrate transporter At1g72120 OS=Arabidopsis thaliana GN=At1g72120 PE=2 SV=2	--	--	--	--	--	--	--	--	--	--	GO:0006810//transport	-	GO:0016020//membrane
Unigene0000100	275	7	1.3812	1	0.1743	--	--	--	--	--	--	--	--	--	--	--	--	--	--	--	--	--	--	-	-	-
Unigene0000101	301	3	0.5408	3	0.4776	--	--	--	--	--	--	--	--	--	--	--	--	--	--	--	--	--	--	-	-	-
Unigene0000102	271	4	0.8009	2	0.3537	gi|225452865|ref|XP_002278558.1|	120	1e-26	PREDICTED: pentatricopeptide repeat-containing protein At5g15280-like [Vitis vinifera]	sp|Q9LXF4|PP384_ARATH	98.2	1e-20	Pentatricopeptide repeat-containing protein At5g15280 OS=Arabidopsis thaliana GN=At5g15280 PE=2 SV=1	--	--	--	--	--	--	--	--	--	--	-	-	-
Unigene0000103	428	9	1.141	1	0.112	gi|508774193|gb|EOY21449.1|	182	3e-45	STELAR K+ outward rectifier isoform 3, partial [Theobroma cacao]	sp|Q9M8S6|SKOR_ARATH	157	2e-38	Potassium channel SKOR OS=Arabidopsis thaliana GN=SKOR PE=1 SV=1	all2748	65.1	4e-11	COG0666	FOG: Ankyrin repeat	--	--	--	--	--	GO:0006811//ion transport;GO:0042221//response to chemical stimulus	GO:0005267//potassium channel activity;GO:0016787//hydrolase activity	GO:0016020//membrane
Unigene0000104	239	7	1.5892	5	1.0025	--	--	--	--	--	--	--	--	--	--	--	--	--	--	--	--	--	--	-	-	-
Unigene0000105	217	8	2.0004	3	0.6625	gi|508716156|gb|EOY08053.1|	50.8	9e-06	GDSL-like Lipase/Acylhydrolase family protein [Theobroma cacao]	--	--	--	--	--	--	--	--	--	--	--	--	--	--	-	-	-
Unigene0000106	208	6	1.5652	1	0.2304	gi|460402811|ref|XP_004246904.1|	95.1	4e-19	PREDICTED: GDSL esterase/lipase At5g03820-like [Solanum lycopersicum]	sp|Q9LZC5|GDL73_ARATH	92	1e-18	GDSL esterase/lipase At5g03820 OS=Arabidopsis thaliana GN=At5g03820 PE=3 SV=1	--	--	--	--	--	--	--	--	--	--	GO:0044238//primary metabolic process	GO:0016788//hydrolase activity, acting on ester bonds	GO:0031410//cytoplasmic vesicle
Unigene0000107	558	26	2.5283	7	0.6012	--	--	--	--	--	--	--	--	--	--	--	--	--	--	--	--	--	--	-	-	-
Unigene0000108	274	8	1.5842	1	0.1749	--	--	--	--	--	--	--	--	--	--	--	--	--	--	--	--	--	--	-	-	-
Unigene0000109	210	3	0.7751	0	0	gi|357505215|ref|XP_003622896.1|	63.9	1e-09	TMV resistance protein N [Medicago truncatula]	--	--	--	--	--	--	--	--	--	--	--	--	--	--	GO:0050896//response to stimulus;GO:0006139//nucleobase-containing compound metabolic process;GO:0050794//regulation of cellular process	GO:0017111//nucleoside-triphosphatase activity;GO:0032559	-
Unigene0000110	335	3	0.4859	1	0.143	--	--	--	--	--	--	--	--	--	--	--	--	--	--	--	--	--	--	-	-	-
Unigene0000111	251	2	0.4324	1	0.1909	--	--	--	--	--	--	--	--	--	--	--	--	--	--	--	--	--	--	-	-	-
Unigene0000112	326	8	1.3315	1	0.147	--	--	--	--	--	--	--	--	--	--	--	--	--	--	--	--	--	--	-	-	-
Unigene0000113	208	2	0.5217	0	0	gi|219123892|ref|XP_002182250.1|	105	3e-22	ubiquitin extension protein 1/2 [Phaeodactylum tricornutum CCAP 1055/1]	sp|P0C224|RL40_NEUCR	119	8e-27	Ubiquitin-60S ribosomal protein L40 OS=Neurospora crassa (strain ATCC 24698 / 74-OR23-1A / CBS 708.71 / DSM 1257 / FGSC 987) GN=ubi-1 PE=1 SV=2	YKR094c_2	109	1e-24	COG1552	Ribosomal protein L40E	K02927	4e-22	102	olu:OSTLU_16428	large subunit ribosomal protein L40e	GO:0034645//cellular macromolecule biosynthetic process	GO:0005198//structural molecule activity	GO:0015934//large ribosomal subunit
Unigene0000114	244	6	1.3343	2	0.3928	gi|507114786|emb|CDF38312.1|	114	5e-25	ribosomal protein L10, partial, partial [Chondrus crispus]	sp|Q54J69|RL10_DICDI	120	3e-27	60S ribosomal protein L10 OS=Dictyostelium discoideum GN=rpl10 PE=1 SV=2	YLR075w	114	3e-26	COG0197	Ribosomal protein L16/L10E	K02866	5e-25	112	osa:4350098	large subunit ribosomal protein L10e	GO:0010224//response to UV-B;GO:0034645//cellular macromolecule biosynthetic process	GO:0005198//structural molecule activity	GO:0009526//plastid envelope;GO:0015934//large ribosomal subunit;GO:0016020//membrane
Unigene0000115	216	7	1.7584	3	0.6656	--	--	--	--	--	--	--	--	--	--	--	--	--	--	--	--	--	--	-	-	-
Unigene0000116	331	8	1.3114	3	0.4343	--	--	--	--	--	--	--	--	--	--	--	--	--	--	--	--	--	--	-	-	-
Unigene0000117	269	5	1.0086	3	0.5344	--	--	--	--	--	--	--	--	--	--	--	--	--	--	--	--	--	--	-	-	-
Unigene0000118	270	6	1.2058	2	0.355	--	--	--	--	--	--	--	--	--	--	--	--	--	--	--	--	--	--	-	-	-
Unigene0000119	775	28	1.9604	4	0.2473	gi|470137501|ref|XP_004304502.1|	105	1e-21	PREDICTED: G-type lectin S-receptor-like serine/threonine-protein kinase CES101-like [Fragaria vesca subsp. vesca]	sp|Q9LW83|CE101_ARATH	91.3	7e-18	G-type lectin S-receptor-like serine/threonine-protein kinase CES101 OS=Arabidopsis thaliana GN=CES101 PE=2 SV=2	--	--	--	--	--	--	--	--	--	--	-	GO:0016772//transferase activity, transferring phosphorus-containing groups	-
Unigene0000120	303	5	0.8954	5	0.7908	gi|359480377|ref|XP_003632441.1|	163	9e-40	PREDICTED: G-type lectin S-receptor-like serine/threonine-protein kinase CES101-like [Vitis vinifera]	sp|Q9LW83|CE101_ARATH	153	4e-37	G-type lectin S-receptor-like serine/threonine-protein kinase CES101 OS=Arabidopsis thaliana GN=CES101 PE=2 SV=2	--	--	--	--	--	--	--	--	--	--	GO:0006464//protein modification process;GO:0006796//phosphate-containing compound metabolic process	GO:0030246//carbohydrate binding;GO:0004713//protein tyrosine kinase activity;GO:0032559	-
Unigene0000121	221	9	2.2097	2	0.4337	--	--	--	--	--	--	--	--	--	--	--	--	--	--	--	--	--	--	-	-	-
Unigene0000122	357	5	0.7599	5	0.6712	--	--	--	--	--	--	--	--	--	--	--	--	--	--	--	--	--	--	-	-	-
Unigene0000123	251	9	1.9456	6	1.1455	gi|225465768|ref|XP_002266923.1|	63.2	5e-12	PREDICTED: TMV resistance protein N-like [Vitis vinifera]	--	--	--	--	--	--	--	--	--	--	--	--	--	--	GO:0050896//response to stimulus	GO:0032559	-
Unigene0000124	517	29	3.0436	3	0.2781	gi|460413223|ref|XP_004251994.1|	287	9e-77	PREDICTED: acetolactate synthase small subunit 1, chloroplastic-like [Solanum lycopersicum]	sp|Q93YZ7|ILVH2_ARATH	278	2e-74	Acetolactate synthase small subunit 2, chloroplastic OS=Arabidopsis thaliana GN=At2g31810 PE=1 SV=1	sll0065	163	1e-40	COG0440	Acetolactate synthase, small (regulatory) subunit	K01653	8e-80	295	pop:POPTR_419949	acetolactate synthase I/III small subunit [EC:2.2.1.6]	GO:0008652//cellular amino acid biosynthetic process	GO:0016744	GO:0009536//plastid
Unigene0000125	226	3	0.7203	4	0.8482	--	--	--	--	--	--	--	--	--	--	--	--	--	--	--	--	--	--	-	-	-
Unigene0000126	346	7	1.0977	2	0.277	--	--	--	--	--	--	--	--	--	--	--	--	--	--	--	--	--	--	-	-	-
Unigene0000127	257	7	1.4779	2	0.3729	gi|6440928|dbj|BAA78597.1|	135	3e-31	60S ribosomal protein L2 [Chlamydomonas sp. HS-5]	sp|Q6FPN7|RL2_CANGA	152	8e-37	60S ribosomal protein L2 OS=Candida glabrata (strain ATCC 2001 / CBS 138 / JCM 3761 / NBRC 0622 / NRRL Y-65) GN=RPL2 PE=4 SV=1	YIL018w	150	7e-37	COG0090	Ribosomal protein L2	--	--	--	--	--	GO:0034645//cellular macromolecule biosynthetic process	GO:0003676//nucleic acid binding;GO:0005198//structural molecule activity	GO:0031090//organelle membrane;GO:0015934//large ribosomal subunit;GO:0009536//plastid
Unigene0000128	291	5	0.9323	3	0.494	gi|81074776|gb|ABB55374.1|	142	2e-33	ribosomal protein L2-like [Solanum tuberosum]	sp|P08093|RL2_SCHPO	162	8e-40	60S ribosomal protein L2 OS=Schizosaccharomyces pombe (strain 972 / ATCC 24843) GN=rpl2a PE=3 SV=2	SPBC839.04	162	2e-40	COG0090	Ribosomal protein L2	K02938	4e-34	142	cre:CHLREDRAFT_172406	large subunit ribosomal protein L8e	GO:0034645//cellular macromolecule biosynthetic process;GO:0003006//developmental process involved in reproduction	GO:0003676//nucleic acid binding;GO:0005198//structural molecule activity	GO:0009536//plastid;GO:0015934//large ribosomal subunit;GO:0031090//organelle membrane
Unigene0000129	249	6	1.3075	0	0	--	--	--	--	--	--	--	--	--	--	--	--	--	--	--	--	--	--	-	-	-
Unigene0000130	443	12	1.4698	5	0.5409	gi|225451709|ref|XP_002276804.1|	202	2e-51	PREDICTED: UDP-glycosyltransferase 83A1 [Vitis vinifera]	sp|Q9SGA8|U83A1_ARATH	159	6e-39	UDP-glycosyltransferase 83A1 OS=Arabidopsis thaliana GN=UGT83A1 PE=2 SV=1	--	--	--	--	--	--	--	--	--	--	-	GO:0035251//UDP-glucosyltransferase activity	-
Unigene0000131	225	3	0.7235	1	0.213	--	--	--	--	--	--	--	--	--	--	--	--	--	--	--	--	--	--	-	-	-
Unigene0000132	367	4	0.5914	1	0.1306	gi|225460125|ref|XP_002275782.1|	57.4	1e-07	PREDICTED: non-lysosomal glucosylceramidase-like [Vitis vinifera]	--	--	--	--	--	--	--	--	--	--	--	--	--	--	GO:0006629//lipid metabolic process	GO:0016787//hydrolase activity	GO:0016020//membrane
Unigene0000133	217	3	0.7501	1	0.2208	--	--	--	--	--	--	--	--	--	--	--	--	--	--	--	--	--	--	-	-	-
Unigene0000134	220	7	1.7265	3	0.6535	--	--	--	--	--	--	--	--	--	--	--	--	--	--	--	--	--	--	-	-	-
Unigene0000135	291	9	1.6782	7	1.1527	--	--	--	--	--	--	--	--	--	--	--	--	--	--	--	--	--	--	-	-	-
Unigene0000136	250	3	0.6511	0	0	--	--	--	--	--	--	--	--	--	--	--	--	--	--	--	--	--	--	-	-	-
Unigene0000137	213	3	0.7642	0	0	--	--	--	--	--	--	--	--	--	--	--	--	--	--	--	--	--	--	-	-	-
Unigene0000138	219	3	0.7433	0	0	--	--	--	--	--	--	--	--	--	--	--	--	--	--	--	--	--	--	-	-	-
Unigene0000139	223	2	0.4866	1	0.2149	--	--	--	--	--	--	--	--	--	--	--	--	--	--	--	--	--	--	-	-	-
Unigene0000140	317	11	1.8828	4	0.6047	--	--	--	--	--	--	--	--	--	--	--	--	--	--	--	--	--	--	-	-	-
Unigene0000141	255	3	0.6384	0	0	--	--	--	--	--	--	--	--	--	--	--	--	--	--	--	--	--	--	-	-	-
Unigene0000142	233	3	0.6986	4	0.8227	gi|1107841|emb|CAA60578.1|	67.4	1e-10	S3 self-incompatibility protein [Papaver rhoeas]	--	--	--	--	--	--	--	--	--	--	--	--	--	--	-	-	-
Unigene0000143	472	14	1.6094	4	0.4061	gi|357447075|ref|XP_003593813.1|	79.7	2e-14	Inversin [Medicago truncatula]	--	--	--	--	--	--	--	--	--	--	--	--	--	--	-	-	-
Unigene0000144	206	9	2.3706	3	0.6979	gi|356568248|ref|XP_003552325.1|	55.1	5e-07	PREDICTED: BTB/POZ domain-containing protein At3g08570-like [Glycine max]	--	--	--	--	--	--	--	--	--	--	--	--	--	--	-	-	-
Unigene0000145	236	8	1.8393	4	0.8122	gi|508712502|gb|EOY04399.1|	147	9e-35	Phototropic-responsive NPH3 family protein isoform 2 [Theobroma cacao]	sp|Q9C9Z7|Y3857_ARATH	117	2e-26	BTB/POZ domain-containing protein At3g08570 OS=Arabidopsis thaliana GN=At3g08570 PE=2 SV=2	--	--	--	--	--	--	--	--	--	--	-	-	-
Unigene0000146	229	4	0.9478	3	0.6278	--	--	--	--	--	--	--	--	--	--	--	--	--	--	--	--	--	--	-	-	-
Unigene0000147	224	6	1.4534	0	0	gi|508737356|dbj|BAN33741.1|	156	1e-37	alpha tubulin, partial [Achnanthes kuwaitensis]	sp|P02553|TBA_LYTPI	160	2e-39	Tubulin alpha chain (Fragment) OS=Lytechinus pictus PE=3 SV=1	SPBC16A3.15c	122	1e-28	COG5023	Tubulin	K07374	5e-38	155	vcn:VOLCADRAFT_109786	tubulin alpha	-	-	-
Unigene0000148	364	12	1.7888	7	0.9216	gi|334186273|ref|NP_001190651.1|	65.9	3e-13	protein kinase family protein [Arabidopsis thaliana]	sp|Q3EDL4|Y1154_ARATH	63.9	3e-13	Probable serine/threonine-protein kinase At1g01540 OS=Arabidopsis thaliana GN=At1g01540 PE=1 SV=2	--	--	--	--	--	--	--	--	--	--	-	-	-
Unigene0000149	218	8	1.9912	1	0.2198	gi|225458649|ref|XP_002282833.1|	93.2	2e-18	PREDICTED: subtilisin-like protease [Vitis vinifera]	--	--	--	--	--	--	--	--	--	--	--	--	--	--	-	-	-
Unigene0000150	231	3	0.7047	0	0	--	--	--	--	--	--	--	--	--	--	--	--	--	--	--	--	--	--	-	-	-
Unigene0000151	224	3	0.7267	0	0	--	--	--	--	--	--	--	--	--	--	--	--	--	--	--	--	--	--	-	-	-
Unigene0000152	226	8	1.9207	2	0.4241	--	--	--	--	--	--	--	--	--	--	--	--	--	--	--	--	--	--	-	-	-
Unigene0000153	211	2	0.5143	0	0	--	--	--	--	--	--	--	--	--	--	--	--	--	--	--	--	--	--	-	-	-
Unigene0000154	206	4	1.0536	3	0.6979	--	--	--	--	--	--	--	--	--	--	--	--	--	--	--	--	--	--	-	-	-
Unigene0000155	384	3	0.4239	3	0.3744	--	--	--	--	--	--	--	--	--	--	--	--	--	--	--	--	--	--	-	-	-
Unigene0000156	684	16	1.2692	0	0	gi|115438086|ref|NP_001043454.1|	248	9e-65	Os01g0591300 [Oryza sativa Japonica Group]	sp|O93344|AL1A2_CHICK	239	2e-62	Retinal dehydrogenase 2 OS=Gallus gallus GN=ALDH1A2 PE=2 SV=2	YER073w	224	1e-58	COG1012	NAD-dependent aldehyde dehydrogenases	K12355	2e-65	248	osa:4326376	coniferyl-aldehyde dehydrogenase [EC:1.2.1.68]	-	-	-
Unigene0000157	347	11	1.7201	7	0.9667	--	--	--	--	--	--	--	--	--	--	--	--	--	--	--	--	--	--	-	-	-
Unigene0000158	384	18	2.5434	8	0.9984	gi|508724103|gb|EOY16000.1|	119	2e-26	Myb domain protein 93 [Theobroma cacao]	--	--	--	--	--	--	--	--	--	K09422	1e-28	124	pop:POPTR_559105	myb proto-oncogene protein, plant	-	-	-
Unigene0000159	225	8	1.9293	3	0.6389	--	--	--	--	--	--	--	--	--	--	--	--	--	--	--	--	--	--	-	-	-
Unigene0000160	397	14	1.9135	9	1.0864	gi|357512079|ref|XP_003626328.1|	164	7e-40	Protein FAM38B [Medicago truncatula]	--	--	--	--	--	--	--	--	--	--	--	--	--	--	-	-	-
Unigene0000161	215	6	1.5142	0	0	gi|357123900|ref|XP_003563645.1|	92.4	3e-18	PREDICTED: 60S ribosomal protein L36-3-like [Brachypodium distachyon]	sp|P49630|RL36_DROME	124	2e-28	60S ribosomal protein L36 OS=Drosophila melanogaster GN=RpL36 PE=3 SV=1	SPCC970.05	71.2	4e-13	COG5051	Ribosomal protein L36E	K02920	7e-19	92	pop:POPTR_822944	large subunit ribosomal protein L36e	-	-	-
Unigene0000162	294	9	1.661	1	0.163	--	--	--	--	sp|P31540|HSP98_NEUCR	92.8	6e-19	Heat shock protein hsp98 OS=Neurospora crassa (strain ATCC 24698 / 74-OR23-1A / CBS 708.71 / DSM 1257 / FGSC 987) GN=hsp98 PE=1 SV=2	YDR258c	55.8	2e-08	COG0542	ATPases with chaperone activity, ATP-binding subunit	--	--	--	--	--	-	-	-
Unigene0000163	203	5	1.3365	0	0	--	--	--	--	--	--	--	--	--	--	--	--	--	--	--	--	--	--	-	-	-
Unigene0000164	330	5	0.8221	1	0.1452	--	--	--	--	--	--	--	--	--	--	--	--	--	--	--	--	--	--	-	-	-
Unigene0000165	202	7	1.8803	4	0.9489	gi|359483452|ref|XP_002270330.2|	121	4e-27	PREDICTED: E3 ubiquitin-protein ligase COP1-like [Vitis vinifera]	sp|P93471|COP1_PEA	116	4e-26	E3 ubiquitin-protein ligase COP1 OS=Pisum sativum GN=COP1 PE=2 SV=1	--	--	--	--	--	K10143	2e-28	123	pop:POPTR_807645	E3 ubiquitin-protein ligase RFWD2 [EC:6.3.2.19]	-	-	-
Unigene0000166	296	7	1.2832	1	0.1619	gi|146196925|dbj|BAF57242.1|	84.7	6e-16	cytochrome c oxidase subunit II [Haptoglossa sp. TK01]	sp|P98021|COX2_SIMVI	91.7	1e-18	Cytochrome c oxidase subunit 2 OS=Simulium vittatum GN=COII PE=3 SV=1	Q0250	72.4	2e-13	COG1622	Heme/copper-type cytochrome/quinol oxidases, subunit 2	K02261	3e-14	76.6	cme:CMW010C	cytochrome c oxidase subunit II [EC:1.9.3.1]	-	-	-
Unigene0000167	338	7	1.1237	1	0.1418	--	--	--	--	--	--	--	--	--	--	--	--	--	--	--	--	--	--	-	-	-
Unigene0000168	221	5	1.2276	4	0.8673	--	--	--	--	--	--	--	--	--	--	--	--	--	--	--	--	--	--	-	-	-
Unigene0000169	230	6	1.4155	0	0	gi|508723728|gb|EOY15625.1|	65.9	3e-10	HD domain class transcription factor [Theobroma cacao]	--	--	--	--	--	--	--	--	--	--	--	--	--	--	-	-	-
Unigene0000170	299	5	0.9074	2	0.3205	gi|508726813|gb|EOY18710.1|	128	4e-29	Receptor-like protein kinase [Theobroma cacao]	sp|Q9SRH7|Y3130_ARATH	84	3e-16	Receptor-like serine/threonine-protein kinase At3g01300 OS=Arabidopsis thaliana GN=At3g01300 PE=2 SV=1	--	--	--	--	--	--	--	--	--	--	-	-	-
Unigene0000171	211	2	0.5143	2	0.4542	--	--	--	--	--	--	--	--	--	--	--	--	--	--	--	--	--	--	-	-	-
Unigene0000172	238	5	1.1399	4	0.8054	gi|224055915|ref|XP_002298700.1|	103	1e-21	cc-nbs-lrr resistance protein [Populus trichocarpa]	sp|O64973|RPS5_ARATH	92.8	6e-19	Disease resistance protein RPS5 OS=Arabidopsis thaliana GN=RPS5 PE=1 SV=2	--	--	--	--	--	K13460	4e-19	92.8	ath:AT1G12220	disease resistance protein RPS5	-	-	-
Unigene0000173	223	3	0.73	1	0.2149	--	--	--	--	--	--	--	--	--	--	--	--	--	--	--	--	--	--	-	-	-
Unigene0000174	235	8	1.8472	5	1.0196	gi|357140426|ref|XP_003571769.1|	88.6	4e-17	PREDICTED: pentatricopeptide repeat-containing protein At1g51965, mitochondrial-like [Brachypodium distachyon]	sp|Q9ZU27|PPR76_ARATH	65.1	1e-10	Pentatricopeptide repeat-containing protein At1g51965, mitochondrial OS=Arabidopsis thaliana GN=At1g51965 PE=2 SV=1	Rv0312	52	3e-07	COG0443	Molecular chaperone	--	--	--	--	--	-	-	-
Unigene0000175	241	6	1.3509	2	0.3977	gi|508711652|gb|EOY03549.1|	55.8	3e-07	Uncharacterized protein TCM_018662 [Theobroma cacao]	--	--	--	--	--	--	--	--	--	--	--	--	--	--	-	-	-
Unigene0000176	250	7	1.5193	1	0.1917	--	--	--	--	--	--	--	--	--	--	--	--	--	--	--	--	--	--	-	-	-
Unigene0000177	498	10	1.0896	2	0.1925	gi|449522630|ref|XP_004168329.1|	209	3e-53	PREDICTED: LOW QUALITY PROTEIN: protein tesmin/TSO1-like CXC 3-like [Cucumis sativus]	sp|F4JIF5|TCX2_ARATH	142	1e-33	Protein tesmin/TSO1-like CXC 2 OS=Arabidopsis thaliana GN=TCX2 PE=1 SV=1	--	--	--	--	--	--	--	--	--	--	-	-	-
Unigene0000178	285	4	0.7615	0	0	--	--	--	--	--	--	--	--	--	--	--	--	--	K11292	9e-06	48.5	vvi:100241331	transcription elongation factor SPT6	-	-	-
Unigene0000179	264	5	1.0277	5	0.9076	--	--	--	--	--	--	--	--	--	--	--	--	--	K11292	9e-06	48.5	vvi:100241331	transcription elongation factor SPT6	-	-	-
Unigene0000180	207	3	0.7864	0	0	--	--	--	--	--	--	--	--	--	--	--	--	--	--	--	--	--	--	-	-	-
Unigene0000181	205	7	1.8528	4	0.935	gi|508723617|gb|EOY15514.1|	115	4e-25	Rhamnogalacturonate lyase family protein [Theobroma cacao]	--	--	--	--	--	--	--	--	--	--	--	--	--	--	-	-	-
Unigene0000182	669	43	3.4876	4	0.2865	gi|225437372|ref|XP_002267786.1|	228	7e-59	PREDICTED: 21 kDa protein [Vitis vinifera]	sp|P17407|21KD_DAUCA	106	1e-22	21 kDa protein OS=Daucus carota PE=2 SV=1	--	--	--	--	--	--	--	--	--	--	-	-	-
Unigene0000183	242	6	1.3453	3	0.5941	--	--	--	--	--	--	--	--	--	--	--	--	--	--	--	--	--	--	-	-	-
Unigene0000184	401	13	1.7591	6	0.717	--	--	--	--	--	--	--	--	--	--	--	--	--	--	--	--	--	--	-	-	-
Unigene0000185	207	3	0.7864	0	0	--	--	--	--	sp|P05661|MYSA_DROME	100	4e-21	Myosin heavy chain, muscle OS=Drosophila melanogaster GN=Mhc PE=1 SV=4	--	--	--	--	--	--	--	--	--	--	-	-	-
Unigene0000186	229	6	1.4217	2	0.4185	gi|508698826|gb|EOX90722.1|	143	1e-33	DEAD/DEAH box RNA helicase family protein [Theobroma cacao]	sp|Q9FT72|RQL3_ARATH	141	1e-33	ATP-dependent DNA helicase Q-like 3 OS=Arabidopsis thaliana GN=RECQL3 PE=1 SV=1	VC0196	83.6	8e-17	COG0514	Superfamily II DNA helicase	K10902	8e-33	138	vvi:100242171	ATP-dependent DNA helicase Q5 [EC:3.6.4.12]	-	-	-
Unigene0000187	628	23	1.9872	6	0.4578	gi|225444694|ref|XP_002277754.1|	350	1e-95	PREDICTED: ATP-dependent DNA helicase Q-like 3-like [Vitis vinifera]	sp|Q9FT72|RQL3_ARATH	317	4e-86	ATP-dependent DNA helicase Q-like 3 OS=Arabidopsis thaliana GN=RECQL3 PE=1 SV=1	alr0205	162	3e-40	COG0514	Superfamily II DNA helicase	K10902	2e-96	350	vvi:100242171	ATP-dependent DNA helicase Q5 [EC:3.6.4.12]	-	-	-
Unigene0000188	205	8	2.1175	0	0	gi|508703551|gb|EOX95447.1|	62.8	2e-09	Pyridoxal phosphate (PLP)-dependent transferases superfamily protein isoform 1 [Theobroma cacao]	--	--	--	--	--	--	--	--	--	--	--	--	--	--	-	-	-
Unigene0000189	241	4	0.9006	3	0.5965	--	--	--	--	--	--	--	--	--	--	--	--	--	--	--	--	--	--	-	-	-
Unigene0000190	204	2	0.532	1	0.2349	gi|255559961|ref|XP_002520999.1|	55.1	5e-07	pentatricopeptide repeat-containing protein, putative [Ricinus communis]	--	--	--	--	--	--	--	--	--	--	--	--	--	--	-	-	-
Unigene0000191	232	6	1.4033	3	0.6197	--	--	--	--	--	--	--	--	--	--	--	--	--	--	--	--	--	--	-	-	-
Unigene0000192	242	10	2.2422	2	0.396	--	--	--	--	--	--	--	--	--	--	--	--	--	--	--	--	--	--	-	-	-
Unigene0000193	226	5	1.2004	0	0	--	--	--	--	--	--	--	--	--	--	--	--	--	--	--	--	--	--	-	-	-
Unigene0000194	335	10	1.6197	3	0.4291	gi|255585374|ref|XP_002533383.1|	56.6	2e-07	conserved hypothetical protein [Ricinus communis]	--	--	--	--	--	--	--	--	--	--	--	--	--	--	-	-	-
Unigene0000195	205	3	0.7941	0	0	gi|224136542|ref|XP_002326886.1|	110	1e-23	cytochrome P450 [Populus trichocarpa]	--	--	--	--	--	--	--	--	--	--	--	--	--	--	-	-	-
Unigene0000196	227	4	0.9561	1	0.2111	--	--	--	--	--	--	--	--	--	--	--	--	--	--	--	--	--	--	-	-	-
Unigene0000197	216	4	1.0048	2	0.4437	--	--	--	--	--	--	--	--	--	--	--	--	--	--	--	--	--	--	-	-	-
Unigene0000198	313	17	2.947	3	0.4593	--	--	--	--	--	--	--	--	--	--	--	--	--	--	--	--	--	--	-	-	-
Unigene0000199	207	4	1.0485	5	1.1575	--	--	--	--	--	--	--	--	--	--	--	--	--	--	--	--	--	--	-	-	-
Unigene0000200	230	8	1.8873	0	0	--	--	--	--	--	--	--	--	--	--	--	--	--	--	--	--	--	--	-	-	-
Unigene0000201	277	10	1.9589	3	0.519	--	--	--	--	--	--	--	--	--	--	--	--	--	--	--	--	--	--	-	-	-
Unigene0000202	203	4	1.0692	3	0.7082	--	--	--	--	--	--	--	--	--	--	--	--	--	--	--	--	--	--	-	-	-
Unigene0000203	219	3	0.7433	1	0.2188	gi|449451838|ref|XP_004143667.1|	82.4	3e-15	PREDICTED: 60S ribosomal protein L13-1-like [Cucumis sativus]	sp|P40212|RL13B_YEAST	84.3	2e-16	60S ribosomal protein L13-B OS=Saccharomyces cerevisiae (strain ATCC 204508 / S288c) GN=RPL13B PE=1 SV=1	YMR142c	84.3	5e-17	COG4352	Ribosomal protein L13E	K02873	7e-16	82	vvi:100246745	large subunit ribosomal protein L13e	-	-	-
Unigene0000204	203	3	0.8019	2	0.4721	--	--	--	--	--	--	--	--	--	--	--	--	--	--	--	--	--	--	-	-	-
Unigene0000205	590	25	2.2992	6	0.4873	gi|470141998|ref|XP_004306709.1|	108	1e-22	PREDICTED: BAG family molecular chaperone regulator 6-like [Fragaria vesca subsp. vesca]	sp|O82345|BAG6_ARATH	99.4	2e-20	BAG family molecular chaperone regulator 6 OS=Arabidopsis thaliana GN=BAG6 PE=1 SV=1	--	--	--	--	--	--	--	--	--	--	-	-	-
Unigene0000206	209	3	0.7789	1	0.2293	--	--	--	--	--	--	--	--	--	--	--	--	--	--	--	--	--	--	-	-	-
Unigene0000207	215	3	0.7571	0	0	gi|307104817|gb|EFN53069.1|	119	2e-26	eukaryotic initiation factor 4A (ATP-dependent RNA helicase eIF4A) [Chlorella variabilis]	sp|B7ZTW1|IF4A3_XENTR	108	8e-24	Eukaryotic initiation factor 4A-III OS=Xenopus tropicalis GN=eif4a3 PE=2 SV=1	SPAC1006.07	107	4e-24	COG0513	Superfamily II DNA and RNA helicases	K03257	5e-25	112	olu:OSTLU_32748	translation initiation factor 4A	-	-	-
Unigene0000208	229	12	2.8433	5	1.0463	gi|508699308|gb|EOX91204.1|	90.1	1e-17	PQ-loop repeat family protein / transmembrane family protein isoform 11 [Theobroma cacao]	--	--	--	--	--	--	--	--	--	--	--	--	--	--	-	-	-
Unigene0000209	551	22	2.1665	9	0.7827	--	--	--	--	--	--	--	--	--	--	--	--	--	--	--	--	--	--	-	-	-
Unigene0000210	267	8	1.6258	1	0.1795	gi|371926716|gb|AEX58497.1|	175	2e-43	hypothetical chloroplast RF21 (chloroplast) [Theobroma grandiflorum]	sp|B1A978|YCF2_CARPA	172	5e-43	Protein ycf2 OS=Carica papaya GN=ycf2-A PE=3 SV=1	--	--	--	--	--	--	--	--	--	--	-	-	-
Unigene0000211	388	15	2.0977	3	0.3705	gi|359484012|ref|XP_003633053.1|	192	2e-48	PREDICTED: LOW QUALITY PROTEIN: cytochrome P450 71D10-like [Vitis vinifera]	sp|O48923|C71DA_SOYBN	180	2e-45	Cytochrome P450 71D10 OS=Glycine max GN=CYP71D10 PE=2 SV=1	alr1450	67	8e-12	COG2124	Cytochrome P450	--	--	--	--	--	-	-	-
Unigene0000212	234	4	0.9275	4	0.8192	--	--	--	--	--	--	--	--	--	--	--	--	--	--	--	--	--	--	-	-	-
Unigene0000213	266	6	1.2239	0	0	--	--	--	--	--	--	--	--	--	--	--	--	--	--	--	--	--	--	-	-	-
Unigene0000214	269	5	1.0086	1	0.1781	gi|334182559|ref|NP_001184987.1|	109	2e-23	PPR repeat-containing protein [Arabidopsis thaliana]	sp|Q9FIX3|PP407_ARATH	65.9	8e-11	Pentatricopeptide repeat-containing protein At5g39710 OS=Arabidopsis thaliana GN=EMB2745 PE=2 SV=1	--	--	--	--	--	--	--	--	--	--	-	-	-
Unigene0000215	330	7	1.151	3	0.4356	--	--	--	--	--	--	--	--	--	--	--	--	--	--	--	--	--	--	-	-	-
Unigene0000216	429	12	1.5178	5	0.5585	--	--	--	--	--	--	--	--	--	--	--	--	--	--	--	--	--	--	-	-	-
Unigene0000217	228	2	0.476	0	0	--	--	--	--	--	--	--	--	--	--	--	--	--	--	--	--	--	--	-	-	-
Unigene0000218	252	1	0.2153	0	0	--	--	--	--	--	--	--	--	--	--	--	--	--	--	--	--	--	--	-	-	-
Unigene0000219	211	2	0.5143	2	0.4542	--	--	--	--	--	--	--	--	--	--	--	--	--	--	--	--	--	--	-	-	-
Unigene0000220	210	6	1.5503	1	0.2282	--	--	--	--	--	--	--	--	--	--	--	--	--	--	--	--	--	--	-	-	-
Unigene0000221	215	6	1.5142	1	0.2229	--	--	--	--	--	--	--	--	--	--	--	--	--	--	--	--	--	--	-	-	-
Unigene0000222	236	3	0.6897	1	0.2031	--	--	--	--	--	--	--	--	--	--	--	--	--	--	--	--	--	--	-	-	-
Unigene0000223	282	7	1.3469	3	0.5098	gi|356540773|ref|XP_003538859.1|	61.2	7e-09	PREDICTED: transmembrane protein 53-like [Glycine max]	--	--	--	--	--	--	--	--	--	--	--	--	--	--	-	-	-
Unigene0000224	256	8	1.6956	1	0.1872	--	--	--	--	--	--	--	--	--	--	--	--	--	--	--	--	--	--	-	-	-
Unigene0000225	247	3	0.659	1	0.194	--	--	--	--	--	--	--	--	--	--	--	--	--	--	--	--	--	--	-	-	-
Unigene0000226	206	5	1.317	2	0.4653	--	--	--	--	--	--	--	--	--	--	--	--	--	--	--	--	--	--	-	-	-
Unigene0000227	389	20	2.7897	0	0	gi|157093615|gb|ABV22462.1|	226	9e-59	ribosomal protein S23e [Oxyrrhis marina]	sp|Q962Q7|RS23_SPOFR	256	4e-68	40S ribosomal protein S23 OS=Spodoptera frugiperda GN=RpS23 PE=2 SV=1	SPBP4H10.13	202	2e-52	COG0048	Ribosomal protein S12	K02973	2e-53	206	rcu:RCOM_0819610	small subunit ribosomal protein S23e	-	-	-
Unigene0000228	211	2	0.5143	2	0.4542	gi|115487048|ref|NP_001066011.1|	81.3	6e-15	Os12g0119000 [Oryza sativa Japonica Group]	--	--	--	--	--	--	--	--	--	--	--	--	--	--	-	-	-
Unigene0000229	364	22	3.2795	7	0.9216	--	--	--	--	--	--	--	--	--	--	--	--	--	--	--	--	--	--	-	-	-
Unigene0000230	320	6	1.0174	2	0.2995	gi|449529956|ref|XP_004171963.1|	64.3	8e-10	PREDICTED: protein VAC14 homolog [Cucumis sativus]	--	--	--	--	--	--	--	--	--	--	--	--	--	--	-	-	-
Unigene0000231	344	8	1.2619	11	1.5324	gi|502115722|ref|XP_004495277.1|	70.1	1e-11	PREDICTED: formin-like protein 5-like, partial [Cicer arietinum]	sp|Q9FLQ7|FH20_ARATH	73.9	3e-13	Formin-like protein 20 OS=Arabidopsis thaliana GN=FH20 PE=2 SV=3	CC3494_1	53.5	9e-08	COG3637	Opacity protein and related surface antigens	--	--	--	--	--	-	-	-
Unigene0000232	201	6	1.6197	2	0.4768	gi|508714462|gb|EOY06359.1|	141	4e-33	Deoxyxylulose-5-phosphate synthase isoform 2 [Theobroma cacao]	sp|O78328|DXS_CAPAN	141	1e-33	Probable 1-deoxy-D-xylulose-5-phosphate synthase, chloroplastic OS=Capsicum annuum GN=TKT2 PE=2 SV=1	BMEI1498	120	8e-28	COG1154	Deoxyxylulose-5-phosphate synthase	K01662	8e-34	141	rcu:RCOM_0679170	1-deoxy-D-xylulose-5-phosphate synthase [EC:2.2.1.7]	-	-	-
Unigene0000233	257	8	1.689	4	0.7459	--	--	--	--	--	--	--	--	--	--	--	--	--	--	--	--	--	--	-	-	-
Unigene0000234	308	7	1.2332	1	0.1556	gi|460369897|ref|XP_004230793.1|	124	7e-28	PREDICTED: probable LRR receptor-like serine/threonine-protein kinase At1g67720-like [Solanum lycopersicum]	sp|C0LGI2|Y1677_ARATH	75.1	1e-13	Probable LRR receptor-like serine/threonine-protein kinase At1g67720 OS=Arabidopsis thaliana GN=At1g67720 PE=2 SV=1	alr0124_1	52.4	2e-07	COG4886	Leucine-rich repeat (LRR) protein	--	--	--	--	--	-	-	-
Unigene0000235	211	3	0.7715	1	0.2271	--	--	--	--	--	--	--	--	--	--	--	--	--	--	--	--	--	--	-	-	-
Unigene0000236	211	4	1.0286	8	1.8169	--	--	--	--	--	--	--	--	--	--	--	--	--	--	--	--	--	--	-	-	-
Unigene0000237	269	4	0.8068	4	0.7126	--	--	--	--	--	--	--	--	--	--	--	--	--	--	--	--	--	--	-	-	-
Unigene0000238	281	7	1.3517	1	0.1705	gi|508714160|gb|EOY06057.1|	146	2e-34	Regulator of chromosome condensation (RCC1) family protein [Theobroma cacao]	--	--	--	--	--	--	--	--	--	--	--	--	--	--	-	-	-
Unigene0000239	364	6	0.8944	1	0.1317	gi|359493721|ref|XP_002280717.2|	109	2e-23	PREDICTED: G-type lectin S-receptor-like serine/threonine-protein kinase At4g27290-like [Vitis vinifera]	sp|O81832|Y4729_ARATH	99.8	5e-21	G-type lectin S-receptor-like serine/threonine-protein kinase At4g27290 OS=Arabidopsis thaliana GN=At4g27290 PE=3 SV=4	--	--	--	--	--	--	--	--	--	--	-	-	-
Unigene0000240	223	7	1.7032	0	0	gi|359495270|ref|XP_002276075.2|	59.7	2e-08	PREDICTED: TMV resistance protein N-like [Vitis vinifera]	--	--	--	--	--	--	--	--	--	--	--	--	--	--	-	-	-
Unigene0000241	225	11	2.6527	3	0.6389	gi|470140007|ref|XP_004305736.1|	90.1	1e-17	PREDICTED: LOW QUALITY PROTEIN: midasin-like [Fragaria vesca subsp. vesca]	--	--	--	--	--	--	--	--	--	K14572	3e-11	66.6	vvi:100244657	midasin	-	-	-
Unigene0000242	259	10	2.095	2	0.37	gi|359482729|ref|XP_002274489.2|	81.6	5e-15	PREDICTED: LOW QUALITY PROTEIN: midasin-like [Vitis vinifera]	--	--	--	--	--	--	--	--	--	K14572	9e-16	81.6	vvi:100244657	midasin	-	-	-
Unigene0000243	559	23	2.2325	11	0.943	gi|508782921|gb|EOY30177.1|	336	2e-91	Flavin-dependent monooxygenase 1 [Theobroma cacao]	sp|Q9LMA1|FMO1_ARATH	302	1e-81	Probable flavin-containing monooxygenase 1 OS=Arabidopsis thaliana GN=FMO1 PE=2 SV=1	--	--	--	--	--	--	--	--	--	--	-	-	-
Unigene0000244	485	17	1.9019	15	1.4821	--	--	--	--	--	--	--	--	--	--	--	--	--	--	--	--	--	--	-	-	-
Unigene0000245	205	4	1.0587	0	0	--	--	--	--	--	--	--	--	--	--	--	--	--	--	--	--	--	--	-	-	-
Unigene0000246	210	5	1.2919	1	0.2282	--	--	--	--	--	--	--	--	--	--	--	--	--	--	--	--	--	--	-	-	-
Unigene0000247	238	4	0.9119	0	0	--	--	--	--	--	--	--	--	--	--	--	--	--	--	--	--	--	--	-	-	-
Unigene0000248	238	4	0.9119	4	0.8054	gi|357461959|ref|XP_003601261.1|	107	6e-23	Serine/threonine protein kinase ATM [Medicago truncatula]	sp|Q9M3G7|ATM_ARATH	97.4	2e-20	Serine/threonine-protein kinase ATM OS=Arabidopsis thaliana GN=ATM PE=2 SV=1	--	--	--	--	--	K04728	2e-20	97.4	ath:AT3G48190	ataxia telangectasia mutated family protein [EC:2.7.11.1]	-	-	-
Unigene0000249	207	3	0.7864	2	0.463	gi|470112507|ref|XP_004292475.1|	105	3e-22	PREDICTED: serine/threonine-protein kinase ATM-like [Fragaria vesca subsp. vesca]	sp|Q9M3G7|ATM_ARATH	84.7	2e-16	Serine/threonine-protein kinase ATM OS=Arabidopsis thaliana GN=ATM PE=2 SV=1	--	--	--	--	--	K04728	1e-19	94.4	rcu:RCOM_1510550	ataxia telangectasia mutated family protein [EC:2.7.11.1]	-	-	-
Unigene0000250	209	3	0.7789	1	0.2293	--	--	--	--	--	--	--	--	--	--	--	--	--	--	--	--	--	--	-	-	-
Unigene0000251	281	6	1.1586	4	0.6821	--	--	--	--	--	--	--	--	--	--	--	--	--	--	--	--	--	--	-	-	-
Unigene0000252	733	43	3.1831	7	0.4576	--	--	--	--	--	--	--	--	--	--	--	--	--	--	--	--	--	--	-	-	-
Unigene0000253	230	5	1.1796	1	0.2084	--	--	--	--	--	--	--	--	--	--	--	--	--	--	--	--	--	--	-	-	-
Unigene0000254	257	2	0.4223	2	0.3729	gi|262410515|gb|ACY66804.1|	52.8	3e-11	triosphosphate isomerase-like protein type II [Dimocarpus longan]	sp|P21820|TPIS_COPJA	51.2	1e-10	Triosephosphate isomerase, cytosolic OS=Coptis japonica PE=2 SV=1	--	--	--	--	--	K01803	3e-11	54.3	rcu:RCOM_0000900	triosephosphate isomerase (TIM) [EC:5.3.1.1]	-	-	-
Unigene0000255	252	3	0.646	0	0	--	--	--	--	--	--	--	--	--	--	--	--	--	--	--	--	--	--	-	-	-
Unigene0000256	236	10	2.2992	2	0.4061	--	--	--	--	--	--	--	--	--	--	--	--	--	--	--	--	--	--	-	-	-
Unigene0000257	590	25	2.2992	10	0.8122	--	--	--	--	--	--	--	--	--	--	--	--	--	--	--	--	--	--	-	-	-
Unigene0000258	290	8	1.4968	2	0.3305	--	--	--	--	--	--	--	--	--	--	--	--	--	--	--	--	--	--	-	-	-
Unigene0000259	230	3	0.7077	0	0	--	--	--	--	--	--	--	--	--	--	--	--	--	--	--	--	--	--	-	-	-
Unigene0000260	267	5	1.0161	0	0	--	--	--	--	--	--	--	--	--	--	--	--	--	--	--	--	--	--	-	-	-
Unigene0000261	222	13	3.1774	1	0.2159	gi|470132937|ref|XP_004302331.1|	99	3e-20	PREDICTED: aspartic proteinase-like [Fragaria vesca subsp. vesca]	sp|O65390|APA1_ARATH	75.1	1e-13	Aspartic proteinase A1 OS=Arabidopsis thaliana GN=APA1 PE=1 SV=1	--	--	--	--	--	K08245	1e-17	87.8	pop:POPTR_834438	phytepsin [EC:3.4.23.40]	-	-	-
Unigene0000262	297	9	1.6442	3	0.484	--	--	--	--	--	--	--	--	--	--	--	--	--	--	--	--	--	--	-	-	-
Unigene0000263	293	5	0.9259	0	0	gi|449501442|ref|XP_004161368.1|	117	8e-26	PREDICTED: uncharacterized LOC101204444 [Cucumis sativus]	--	--	--	--	--	--	--	--	--	--	--	--	--	--	-	-	-
Unigene0000264	293	8	1.4815	0	0	gi|302832668|ref|XP_002947898.1|	142	2e-33	component of cytosolic 80S ribosome and 40S small subunit [Volvox carteri f. nagariensis]	sp|P62282|RS11_RAT	178	9e-45	40S ribosomal protein S11 OS=Rattus norvegicus GN=Rps11 PE=1 SV=3	YDR025w	140	6e-34	COG0186	Ribosomal protein S17	K02949	3e-34	142	vcn:VOLCADRAFT_108961	small subunit ribosomal protein S11e	-	-	-
Unigene0000265	257	13	2.7447	72	13.4253	gi|11467171|ref|NP_043004.1|	147	7e-35	photosystem II protein D1 [Zea mays]	sp|P48183|PSBA_MAIZE	147	2e-35	Photosystem Q(B) protein OS=Zea mays GN=psbA PE=3 SV=1	--	--	--	--	--	K02703	1e-35	147	zma:845199	photosystem II P680 reaction center D1 protein	-	-	-
Unigene0000266	211	10	2.5716	48	10.9014	gi|519704484|ref|YP_008082561.1|	147	9e-35	photosystem II protein D1 (chloroplast) [Utricularia gibba]	sp|P12463|PSBA_WHEAT	147	3e-35	Photosystem Q(B) protein OS=Triticum aestivum GN=psbA PE=3 SV=2	--	--	--	--	--	K02703	2e-35	147	zma:845199	photosystem II P680 reaction center D1 protein	-	-	-
Unigene0000267	359	7	1.058	4	0.5339	gi|514717291|ref|XP_004953705.1|	56.2	2e-07	PREDICTED: ADP,ATP carrier protein 2, mitochondrial-like [Setaria italica]	sp|P02723|ADT_NEUCR	68.9	9e-12	ADP,ATP carrier protein OS=Neurospora crassa (strain ATCC 24698 / 74-OR23-1A / CBS 708.71 / DSM 1257 / FGSC 987) GN=acp PE=3 SV=1	--	--	--	--	--	K05863	1e-08	57.8	ppp:PHYPADRAFT_147904	solute carrier family 25 (mitochondrial adenine nucleotide translocator), member 4/5/6/31	-	-	-
Unigene0000268	275	1	0.1973	0	0	gi|449442214|ref|XP_004138877.1|	87.4	9e-17	PREDICTED: endonuclease V-like [Cucumis sativus]	sp|Q8C9A2|ENDOV_MOUSE	65.9	8e-11	Endonuclease V OS=Mus musculus GN=Endov PE=1 SV=2	aq_548	50.4	8e-07	COG1515	Deoxyinosine 3'endonuclease (endonuclease V)	K05982	5e-16	82.4	ath:AT4G31150	deoxyribonuclease V [EC:3.1.21.7]	-	-	-
Unigene0000269	219	3	0.7433	3	0.6565	--	--	--	--	--	--	--	--	--	--	--	--	--	--	--	--	--	--	-	-	-
Unigene0000270	213	3	0.7642	0	0	--	--	--	--	--	--	--	--	--	--	--	--	--	--	--	--	--	--	-	-	-
Unigene0000271	202	3	0.8058	2	0.4745	--	--	--	--	--	--	--	--	--	--	--	--	--	--	--	--	--	--	-	-	-
Unigene0000272	299	7	1.2703	0	0	--	--	--	--	--	--	--	--	--	--	--	--	--	--	--	--	--	--	-	-	-
Unigene0000273	260	5	1.0435	1	0.1843	--	--	--	--	--	--	--	--	--	--	--	--	--	--	--	--	--	--	-	-	-
Unigene0000274	248	4	0.8752	1	0.1932	gi|357508239|ref|XP_003624408.1|	56.2	9e-11	DNA ligase [Medicago truncatula]	--	--	--	--	--	--	--	--	--	--	--	--	--	--	-	-	-
Unigene0000275	229	8	1.8956	2	0.4185	gi|356497757|ref|XP_003517725.1|	57.8	7e-08	PREDICTED: proline-rich receptor-like protein kinase PERK13-like [Glycine max]	--	--	--	--	--	--	--	--	--	--	--	--	--	--	-	-	-
Unigene0000276	289	5	0.9388	2	0.3316	gi|359493479|ref|XP_003634609.1|	96.7	1e-19	PREDICTED: receptor-like protein 12-like [Vitis vinifera]	sp|Q9M0G7|PXL2_ARATH	54.3	2e-07	Leucine-rich repeat receptor-like protein kinase PXL2 OS=Arabidopsis thaliana GN=PXL2 PE=2 SV=1	--	--	--	--	--	--	--	--	--	--	-	-	-
Unigene0000277	286	5	0.9486	1	0.1676	--	--	--	--	--	--	--	--	--	--	--	--	--	--	--	--	--	--	-	-	-
Unigene0000278	302	6	1.078	1	0.1587	gi|145408591|ref|YP_001152215.1|	55.8	3e-07	ORF44l [Pinus koraiensis]	--	--	--	--	--	--	--	--	--	--	--	--	--	--	-	-	-
Unigene0000279	251	4	0.8647	3	0.5728	--	--	--	--	--	--	--	--	--	--	--	--	--	--	--	--	--	--	-	-	-
Unigene0000280	264	6	1.2332	1	0.1815	--	--	--	--	--	--	--	--	--	--	--	--	--	--	--	--	--	--	-	-	-
Unigene0000281	288	6	1.1304	0	0	--	--	--	--	--	--	--	--	--	--	--	--	--	--	--	--	--	--	-	-	-
Unigene0000282	344	9	1.4196	6	0.8358	gi|508719141|gb|EOY11038.1|	201	3e-51	FAD/NAD(P)-binding oxidoreductase family protein [Theobroma cacao]	--	--	--	--	--	--	--	--	--	--	--	--	--	--	-	-	-
Unigene0000283	256	5	1.0598	2	0.3744	gi|470144719|ref|XP_004307995.1|	109	2e-23	PREDICTED: protein IQ-DOMAIN 14-like [Fragaria vesca subsp. vesca]	sp|Q9SF32|IQD1_ARATH	52.4	9e-07	Protein IQ-DOMAIN 1 OS=Arabidopsis thaliana GN=IQD1 PE=1 SV=1	--	--	--	--	--	--	--	--	--	--	-	-	-
Unigene0000284	219	3	0.7433	0	0	--	--	--	--	--	--	--	--	--	--	--	--	--	--	--	--	--	--	-	-	-
Unigene0000285	265	10	2.0476	3	0.5425	--	--	--	--	--	--	--	--	--	--	--	--	--	--	--	--	--	--	-	-	-
Unigene0000286	271	6	1.2013	2	0.3537	--	--	--	--	--	--	--	--	--	--	--	--	--	--	--	--	--	--	-	-	-
Unigene0000287	253	4	0.8579	2	0.3788	--	--	--	--	--	--	--	--	--	--	--	--	--	--	--	--	--	--	-	-	-
Unigene0000288	512	10	1.0598	1	0.0936	gi|359478218|ref|XP_003632087.1|	98.2	7e-20	PREDICTED: UDP-glycosyltransferase 74E2-like [Vitis vinifera]	sp|P0C7P7|U74E1_ARATH	71.2	3e-12	UDP-glycosyltransferase 74E1 OS=Arabidopsis thaliana GN=UGT74E1 PE=3 SV=1	--	--	--	--	--	--	--	--	--	--	-	-	-
Unigene0000289	267	4	0.8129	1	0.1795	--	--	--	--	--	--	--	--	--	--	--	--	--	--	--	--	--	--	-	-	-
Unigene0000290	294	14	2.5838	4	0.652	gi|224057808|ref|XP_002299334.1|	52.4	3e-06	predicted protein [Populus trichocarpa]	--	--	--	--	--	--	--	--	--	--	--	--	--	--	-	-	-
Unigene0000291	786	55	3.7968	8	0.4877	gi|397914254|gb|AFO70139.1|	66.6	6e-10	ferritin Fer18;3 [Glycine max]	sp|P17663|FRIHB_XENLA	67	1e-10	Ferritin heavy chain B OS=Xenopus laevis GN=fth1-b PE=2 SV=2	--	--	--	--	--	K00522	2e-10	65.9	zma:100280477	ferritin heavy chain [EC:1.16.3.1]	-	-	-
Unigene0000292	206	8	2.1072	3	0.6979	gi|359476165|ref|XP_002283141.2|	77	1e-13	PREDICTED: LRR receptor-like serine/threonine-protein kinase GSO1-like [Vitis vinifera]	sp|Q9C9H7|RLP12_ARATH	58.5	1e-08	Receptor-like protein 12 OS=Arabidopsis thaliana GN=RLP12 PE=2 SV=2	--	--	--	--	--	--	--	--	--	--	-	-	-
Unigene0000293	379	14	2.0043	2	0.2529	gi|508705146|gb|EOX97042.1|	104	5e-22	Uncharacterized protein TCM_006157 [Theobroma cacao]	--	--	--	--	--	--	--	--	--	--	--	--	--	--	-	-	-
Unigene0000294	254	5	1.0681	0	0	gi|502158009|ref|XP_004510992.1|	66.2	2e-10	PREDICTED: structural maintenance of chromosomes protein 2-1-like [Cicer arietinum]	sp|Q9C5Y4|SMC21_ARATH	53.1	5e-07	Structural maintenance of chromosomes protein 2-1 OS=Arabidopsis thaliana GN=SMC2-1 PE=2 SV=2	--	--	--	--	--	K06674	2e-10	63.9	pop:POPTR_826684	structural maintenance of chromosome 2	-	-	-
Unigene0000295	371	9	1.3163	2	0.2583	--	--	--	--	--	--	--	--	--	--	--	--	--	--	--	--	--	--	-	-	-
Unigene0000296	604	21	1.8865	6	0.476	gi|225453949|ref|XP_002279998.1|	272	4e-72	PREDICTED: probable LRR receptor-like serine/threonine-protein kinase At4g08850 [Vitis vinifera]	sp|C0LGG8|Y5343_ARATH	119	1e-26	Probable LRR receptor-like serine/threonine-protein kinase At1g53430 OS=Arabidopsis thaliana GN=At1g53430 PE=1 SV=1	BS_yloP_1	57.8	1e-08	COG0515	Serine/threonine protein kinase	--	--	--	--	--	-	-	-
Unigene0000297	357	9	1.3679	0	0	gi|508704333|gb|EOX96229.1|	212	2e-54	Leucine-rich repeat receptor protein kinase [Theobroma cacao]	sp|O04086|Y1105_ARATH	83.6	4e-16	Probable receptor-like protein kinase At1g11050 OS=Arabidopsis thaliana GN=At1g11050 PE=2 SV=1	--	--	--	--	--	--	--	--	--	--	-	-	-
Unigene0000298	201	3	0.8099	7	1.6689	--	--	--	--	--	--	--	--	--	--	--	--	--	--	--	--	--	--	-	-	-
Unigene0000299	594	24	2.1923	13	1.0488	gi|225452218|ref|XP_002271204.1|	66.6	3e-10	PREDICTED: protein FAR1-RELATED SEQUENCE 5-like [Vitis vinifera]	--	--	--	--	--	--	--	--	--	--	--	--	--	--	-	-	-
Unigene0000300	219	5	1.2388	2	0.4376	--	--	--	--	--	--	--	--	--	--	--	--	--	--	--	--	--	--	-	-	-
Unigene0000301	480	32	3.6173	8	0.7987	gi|502145872|ref|XP_004506217.1|	162	3e-39	PREDICTED: serine/threonine-protein kinase Nek5-like [Cicer arietinum]	sp|Q94CU5|NEK5_ORYSJ	157	3e-38	Serine/threonine-protein kinase Nek5 OS=Oryza sativa subsp. japonica GN=NEK5 PE=2 SV=1	YAR018c	47.8	9e-06	COG0515	Serine/threonine protein kinase	K08857	1e-39	161	vvi:100258125	NIMA (never in mitosis gene a)-related kinase [EC:2.7.11.1]	-	-	-
Unigene0000302	303	7	1.2535	3	0.4745	--	--	--	--	--	--	--	--	--	--	--	--	--	--	--	--	--	--	-	-	-
Unigene0000303	216	4	1.0048	3	0.6656	gi|508715547|gb|EOY07444.1|	75.5	3e-13	Zinc-finger protein 10, putative [Theobroma cacao]	--	--	--	--	--	--	--	--	--	--	--	--	--	--	-	-	-
Unigene0000304	297	11	2.0096	0	0	gi|302850130|ref|XP_002956593.1|	155	3e-37	component of cytosolic 80S ribosome and 60S large subunit [Volvox carteri f. nagariensis]	sp|Q27021|RL27A_TENMO	175	9e-44	60S ribosomal protein L27a OS=Tenebrio molitor GN=RpL27A PE=2 SV=1	SPBC776.11	140	7e-34	COG0200	Ribosomal protein L15	K02900	5e-38	155	vcn:VOLCADRAFT_77145	large subunit ribosomal protein L27Ae	-	-	-
Unigene0000305	201	4	1.0798	1	0.2384	--	--	--	--	--	--	--	--	--	--	--	--	--	--	--	--	--	--	-	-	-
Unigene0000306	278	8	1.5614	5	0.8619	--	--	--	--	--	--	--	--	--	--	--	--	--	--	--	--	--	--	-	-	-
Unigene0000307	245	8	1.7718	2	0.3912	gi|357492397|ref|XP_003616487.1|	40	3e-06	Metallocarboxypeptidase inhibitor [Medicago truncatula]	--	--	--	--	--	--	--	--	--	--	--	--	--	--	-	-	-
Unigene0000308	496	17	1.8597	4	0.3865	gi|358346026|ref|XP_003637074.1|	59.7	7e-18	Cell wall-associated hydrolase, partial [Medicago truncatula]	--	--	--	--	--	--	--	--	--	--	--	--	--	--	-	-	-
Unigene0000309	232	6	1.4033	0	0	--	--	--	--	--	--	--	--	--	--	--	--	--	--	--	--	--	--	-	-	-
Unigene0000310	250	8	1.7363	1	0.1917	gi|407731642|gb|AFU25705.1|	94.7	6e-19	gag-pol precursor [Castanea mollissima]	sp|Q9UR07|RTF23_SCHPO	49.3	8e-06	Retrotransposable element Tf2 155 kDa protein type 3 OS=Schizosaccharomyces pombe (strain 972 / ATCC 24843) GN=Tf2-11 PE=4 SV=1	SPAC9.04	49.3	2e-06	COG2801	Transposase and inactivated derivatives	--	--	--	--	--	-	-	-
Unigene0000311	215	4	1.0095	0	0	--	--	--	--	--	--	--	--	--	--	--	--	--	--	--	--	--	--	-	-	-
Unigene0000312	243	6	1.3398	2	0.3944	gi|359483452|ref|XP_002270330.2|	122	2e-27	PREDICTED: E3 ubiquitin-protein ligase COP1-like [Vitis vinifera]	sp|P93471|COP1_PEA	116	5e-26	E3 ubiquitin-protein ligase COP1 OS=Pisum sativum GN=COP1 PE=2 SV=1	YCR066w	53.5	9e-08	COG5432	RING-finger-containing E3 ubiquitin ligase	K10143	5e-28	122	vvi:100246063	E3 ubiquitin-protein ligase RFWD2 [EC:6.3.2.19]	-	-	-
Unigene0000313	216	7	1.7584	1	0.2219	gi|508781577|gb|EOY28833.1|	107	6e-23	Transducin/WD40 repeat-like superfamily protein isoform 2 [Theobroma cacao]	sp|P43254|COP1_ARATH	100	2e-21	E3 ubiquitin-protein ligase COP1 OS=Arabidopsis thaliana GN=COP1 PE=1 SV=2	--	--	--	--	--	K10143	5e-22	102	vvi:100246063	E3 ubiquitin-protein ligase RFWD2 [EC:6.3.2.19]	-	-	-
Unigene0000314	292	7	1.3008	3	0.4923	gi|508704964|gb|EOX96860.1|	136	2e-31	RING/U-box superfamily protein [Theobroma cacao]	sp|Q9FLC6|ATL73_ARATH	62.4	9e-10	RING-H2 finger protein ATL73 OS=Arabidopsis thaliana GN=ATL73 PE=2 SV=1	--	--	--	--	--	--	--	--	--	--	-	-	-
Unigene0000315	247	5	1.0984	2	0.388	gi|449483991|ref|XP_004156752.1|	53.5	1e-06	PREDICTED: LOW QUALITY PROTEIN: pleiotropic drug resistance protein 1-like [Cucumis sativus]	--	--	--	--	--	--	--	--	--	--	--	--	--	--	-	-	-
Unigene0000316	256	4	0.8478	2	0.3744	--	--	--	--	--	--	--	--	--	--	--	--	--	--	--	--	--	--	-	-	-
Unigene0000317	499	23	2.501	10	0.9603	gi|514824278|ref|XP_004986797.1|	218	5e-56	PREDICTED: vacuolar protein sorting-associated protein 13-like [Setaria italica]	sp|Q07878|VPS13_YEAST	93.2	7e-19	Vacuolar protein sorting-associated protein 13 OS=Saccharomyces cerevisiae (strain ATCC 204508 / S288c) GN=VPS13 PE=1 SV=1	YLL040c	93.2	2e-19	COG5043	Vacuolar protein sorting-associated protein	--	--	--	--	--	-	-	-
Unigene0000318	236	8	1.8393	1	0.2031	--	--	--	--	--	--	--	--	--	--	--	--	--	--	--	--	--	--	-	-	-
Unigene0000319	240	9	2.0348	3	0.599	gi|508727870|gb|EOY19767.1|	58.9	3e-08	LRR and NB-ARC domains-containing disease resistance protein, putative [Theobroma cacao]	--	--	--	--	--	--	--	--	--	--	--	--	--	--	-	-	-
Unigene0000320	232	6	1.4033	1	0.2066	--	--	--	--	--	--	--	--	--	--	--	--	--	--	--	--	--	--	-	-	-
Unigene0000321	206	3	0.7902	0	0	--	--	--	--	--	--	--	--	--	--	--	--	--	--	--	--	--	--	-	-	-
Unigene0000322	282	5	0.9621	2	0.3399	--	--	--	--	--	--	--	--	--	--	--	--	--	--	--	--	--	--	-	-	-
Unigene0000323	503	15	1.6181	0	0	gi|474416088|gb|EMS67171.1|	257	9e-68	Elongation factor 2 [Triticum urartu]	sp|Q1HPK6|EF2_BOMMO	345	1e-94	Translation elongation factor 2 OS=Bombyx mori GN=tef2 PE=1 SV=1	YOR133w	232	3e-61	COG0480	Translation elongation factors (GTPases)	K03234	1e-67	254	ppp:PHYPADRAFT_189887	elongation factor 2	-	-	-
Unigene0000324	259	5	1.0475	0	0	gi|159474294|ref|XP_001695264.1|	148	4e-35	heat shock protein 90A [Chlamydomonas reinhardtii]	sp|P40292|HSP90_ASPFU	160	3e-39	Heat shock protein 90 OS=Neosartorya fumigata (strain ATCC MYA-4609 / Af293 / CBS 101355 / FGSC A1100) GN=hsp90 PE=1 SV=3	YMR186w	130	6e-31	COG0326	Molecular chaperone, HSP90 family	K04079	8e-36	148	cre:CHLREDRAFT_138117	molecular chaperone HtpG	-	-	-
Unigene0000325	208	5	1.3043	6	1.3823	gi|508785650|gb|EOY32906.1|	114	9e-25	Calcium-dependent lipid-binding family protein [Theobroma cacao]	--	--	--	--	--	--	--	--	--	--	--	--	--	--	-	-	-
Unigene0000326	238	5	1.1399	2	0.4027	gi|317134971|gb|ADV03048.1|	89	3e-17	ribosomal protein S21 [Amphidinium carterae]	sp|O93798|RS21_NEUCR	119	8e-27	40S ribosomal protein S21 OS=Neurospora crassa (strain ATCC 24698 / 74-OR23-1A / CBS 708.71 / DSM 1257 / FGSC 987) GN=rps-21 PE=3 SV=1	--	--	--	--	--	K02971	1e-16	84.3	cme:CMQ051C	small subunit ribosomal protein S21e	-	-	-
Unigene0000327	211	4	1.0286	0	0	gi|146196925|dbj|BAF57242.1|	82.8	2e-15	cytochrome c oxidase subunit II [Haptoglossa sp. TK01]	sp|P98030|COX2_CHORO	122	9e-28	Cytochrome c oxidase subunit 2 OS=Choristoneura rosaceana GN=COII PE=3 SV=1	Q0250	78.2	3e-15	COG1622	Heme/copper-type cytochrome/quinol oxidases, subunit 2	K02261	8e-15	78.6	cme:CMW010C	cytochrome c oxidase subunit II [EC:1.9.3.1]	-	-	-
Unigene0000328	224	4	0.9689	0	0	--	--	--	--	--	--	--	--	--	--	--	--	--	--	--	--	--	--	-	-	-
Unigene0000329	227	4	0.9561	0	0	--	--	--	--	--	--	--	--	--	--	--	--	--	--	--	--	--	--	-	-	-
Unigene0000330	305	6	1.0674	1	0.1571	gi|502124140|ref|XP_004498403.1|	65.9	3e-10	PREDICTED: cyclic nucleotide-gated ion channel 1-like [Cicer arietinum]	sp|O65717|CNGC1_ARATH	60.5	3e-09	Cyclic nucleotide-gated ion channel 1 OS=Arabidopsis thaliana GN=CNGC1 PE=1 SV=1	--	--	--	--	--	K05391	2e-09	60.5	ath:AT5G53130	cyclic nucleotide gated channel, other eukaryote	-	-	-
Unigene0000331	358	8	1.2125	1	0.1339	--	--	--	--	--	--	--	--	--	--	--	--	--	--	--	--	--	--	-	-	-
Unigene0000332	261	8	1.6631	1	0.1836	gi|508701468|gb|EOX93364.1|	161	5e-39	GDSL-like Lipase/Acylhydrolase superfamily protein [Theobroma cacao]	sp|Q9SJB4|GDL34_ARATH	157	3e-38	GDSL esterase/lipase At2g04570 OS=Arabidopsis thaliana GN=At2g04570 PE=2 SV=1	--	--	--	--	--	--	--	--	--	--	-	-	-
Unigene0000333	209	6	1.5577	0	0	--	--	--	--	--	--	--	--	--	--	--	--	--	--	--	--	--	--	-	-	-
Unigene0000334	236	4	0.9197	1	0.2031	gi|357507741|ref|XP_003624159.1|	43.5	8e-08	Pentatricopeptide repeat-containing protein [Medicago truncatula]	--	--	--	--	--	--	--	--	--	--	--	--	--	--	-	-	-
Unigene0000335	301	2	0.3605	2	0.3184	gi|449443196|ref|XP_004139366.1|	61.6	5e-09	PREDICTED: LOW QUALITY PROTEIN: protein SUPPRESSOR OF npr1-1, CONSTITUTIVE 1-like [Cucumis sativus]	sp|Q9SZ67|WRK19_ARATH	54.3	2e-07	Probable WRKY transcription factor 19 OS=Arabidopsis thaliana GN=WRKY19 PE=2 SV=1	--	--	--	--	--	--	--	--	--	--	-	-	-
Unigene0000336	205	8	2.1175	3	0.7013	--	--	--	--	--	--	--	--	--	--	--	--	--	--	--	--	--	--	-	-	-
Unigene0000337	212	6	1.5357	4	0.9042	gi|449487010|ref|XP_004157469.1|	77.4	9e-14	PREDICTED: probable serine/threonine-protein kinase At1g18390-like [Cucumis sativus]	sp|P0C5E2|Y1839_ARATH	51.2	2e-06	Probable serine/threonine-protein kinase At1g18390 OS=Arabidopsis thaliana GN=At1g18390 PE=1 SV=2	--	--	--	--	--	--	--	--	--	--	-	-	-
Unigene0000338	467	12	1.3943	4	0.4105	gi|15229364|ref|NP_187135.1|	222	3e-57	40S ribosomal protein S3a-1 [Arabidopsis thaliana]	sp|C7YTD6|RS3A_NECH7	287	2e-77	40S ribosomal protein S1 OS=Nectria haematococca (strain 77-13-4 / ATCC MYA-4622 / FGSC 9596 / MPVI) GN=RPS1 PE=3 SV=1	YML063w	222	2e-58	COG1890	Ribosomal protein S3AE	K02984	6e-58	222	ath:AT3G04840	small subunit ribosomal protein S3Ae	-	-	-
Unigene0000339	213	3	0.7642	0	0	--	--	--	--	sp|C7YTD6|RS3A_NECH7	62.4	9e-10	40S ribosomal protein S1 OS=Nectria haematococca (strain 77-13-4 / ATCC MYA-4622 / FGSC 9596 / MPVI) GN=RPS1 PE=3 SV=1	--	--	--	--	--	--	--	--	--	--	-	-	-
Unigene0000340	310	10	1.7503	2	0.3092	gi|502117411|ref|XP_004495813.1|	139	2e-32	PREDICTED: transcription factor MYB86-like [Cicer arietinum]	sp|Q8LPH6|MYB86_ARATH	136	4e-32	Transcription factor MYB86 OS=Arabidopsis thaliana GN=MYB86 PE=2 SV=1	--	--	--	--	--	K09422	2e-32	136	zma:100272313	myb proto-oncogene protein, plant	-	-	-
Unigene0000341	418	15	1.9471	8	0.9171	gi|359473565|ref|XP_002265580.2|	159	1e-38	PREDICTED: ATP-dependent zinc metalloprotease FTSH, chloroplastic [Vitis vinifera]	--	--	--	--	--	--	--	--	--	--	--	--	--	--	-	-	-
Unigene0000342	225	3	0.7235	1	0.213	--	--	--	--	--	--	--	--	--	--	--	--	--	--	--	--	--	--	-	-	-
Unigene0000343	300	7	1.2661	6	0.9584	--	--	--	--	--	--	--	--	--	--	--	--	--	--	--	--	--	--	-	-	-
Unigene0000344	262	4	0.8284	1	0.1829	--	--	--	--	--	--	--	--	--	--	--	--	--	--	--	--	--	--	-	-	-
Unigene0000345	576	18	1.6956	1	0.0832	gi|449518757|ref|XP_004166402.1|	52	8e-06	PREDICTED: uncharacterized LOC101209453 [Cucumis sativus]	--	--	--	--	--	--	--	--	--	--	--	--	--	--	-	-	-
Unigene0000346	233	8	1.863	2	0.4113	--	--	--	--	--	--	--	--	--	--	--	--	--	--	--	--	--	--	-	-	-
Unigene0000347	210	2	0.5168	0	0	gi|225450215|ref|XP_002265394.1|	53.1	8e-10	PREDICTED: 60S ribosomal protein L6 [Vitis vinifera]	sp|P34091|RL6_MESCR	52.4	3e-09	60S ribosomal protein L6 OS=Mesembryanthemum crystallinum GN=RPL6 PE=2 SV=1	--	--	--	--	--	K02934	1e-10	53.1	vvi:100252724	large subunit ribosomal protein L6e	-	-	-
Unigene0000348	260	4	0.8348	0	0	gi|508724739|gb|EOY16636.1|	116	1e-25	Cysteine-rich RLK (RECEPTOR-like protein kinase) 8 [Theobroma cacao]	sp|P10978|POLX_TOBAC	73.6	4e-13	Retrovirus-related Pol polyprotein from transposon TNT 1-94 OS=Nicotiana tabacum PE=2 SV=1	--	--	--	--	--	--	--	--	--	--	-	-	-
Unigene0000349	585	21	1.9478	7	0.5734	gi|329741907|gb|AEB98601.1|	345	3e-94	alpha-galactosidase [Nicotiana tabacum]	sp|Q42656|AGAL_COFAR	335	2e-91	Alpha-galactosidase OS=Coffea arabica PE=1 SV=1	--	--	--	--	--	K07407	9e-97	352	pop:POPTR_786149	alpha-galactosidase [EC:3.2.1.22]	-	-	-
Unigene0000350	223	3	0.73	0	0	gi|351724789|ref|NP_001235022.1|	63.5	1e-09	alpha galactosidase precursor [Glycine max]	sp|P14749|AGAL_CYATE	59.3	7e-09	Alpha-galactosidase OS=Cyamopsis tetragonoloba PE=1 SV=1	--	--	--	--	--	K07407	2e-10	64.3	rcu:RCOM_0612700	alpha-galactosidase [EC:3.2.1.22]	-	-	-
Unigene0000351	271	13	2.6029	3	0.5305	--	--	--	--	--	--	--	--	--	--	--	--	--	--	--	--	--	--	-	-	-
Unigene0000352	204	6	1.5959	3	0.7047	--	--	--	--	--	--	--	--	--	--	--	--	--	--	--	--	--	--	-	-	-
Unigene0000353	241	11	2.4766	2	0.3977	--	--	--	--	--	--	--	--	--	--	--	--	--	--	--	--	--	--	-	-	-
Unigene0000354	365	12	1.7839	5	0.6565	--	--	--	--	--	--	--	--	--	--	--	--	--	--	--	--	--	--	-	-	-
Unigene0000355	509	15	1.599	3	0.2824	gi|392522144|gb|AFM77941.1|	160	1e-38	NBS-LRR disease resistance protein NBS1, partial [Dimocarpus longan]	sp|O23530|SNC1_ARATH	98.2	2e-20	Protein SUPPRESSOR OF npr1-1, CONSTITUTIVE 1 OS=Arabidopsis thaliana GN=SNC1 PE=1 SV=3	--	--	--	--	--	--	--	--	--	--	-	-	-
Unigene0000356	342	5	0.7933	0	0	--	--	--	--	--	--	--	--	--	--	--	--	--	--	--	--	--	--	-	-	-
Unigene0000357	407	5	0.6666	1	0.1177	gi|474077455|gb|EMS54598.1|	160	6e-39	Transposon Ty3-G Gag-Pol polyprotein [Triticum urartu]	--	--	--	--	--	--	--	--	--	--	--	--	--	--	-	-	-
Unigene0000358	208	4	1.0435	2	0.4608	gi|508779197|gb|EOY26453.1|	53.5	4e-12	Glycosyl hydrolase 9A1 [Theobroma cacao]	sp|Q94KB2|MLO13_ARATH	50.4	1e-09	MLO-like protein 13 OS=Arabidopsis thaliana GN=MLO13 PE=2 SV=1	--	--	--	--	--	K08472	9e-10	50.4	ath:AT4G24250	mlo protein	-	-	-
Unigene0000359	216	5	1.256	1	0.2219	--	--	--	--	--	--	--	--	--	--	--	--	--	--	--	--	--	--	-	-	-
Unigene0000360	239	3	0.6811	1	0.2005	--	--	--	--	--	--	--	--	--	--	--	--	--	--	--	--	--	--	-	-	-
Unigene0000361	332	11	1.7978	3	0.433	--	--	--	--	--	--	--	--	--	--	--	--	--	--	--	--	--	--	-	-	-
Unigene0000362	400	6	0.8139	4	0.4792	--	--	--	--	--	--	--	--	--	--	--	--	--	--	--	--	--	--	-	-	-
Unigene0000363	267	8	1.6258	5	0.8974	gi|224067926|ref|XP_002302602.1|	64.3	8e-10	predicted protein [Populus trichocarpa]	--	--	--	--	--	--	--	--	--	--	--	--	--	--	-	-	-
Unigene0000364	216	4	1.0048	1	0.2219	--	--	--	--	--	--	--	--	--	--	--	--	--	--	--	--	--	--	-	-	-
Unigene0000365	342	10	1.5866	3	0.4204	--	--	--	--	--	--	--	--	--	--	--	--	--	--	--	--	--	--	-	-	-
Unigene0000366	300	5	0.9043	0	0	--	--	--	--	--	--	--	--	--	--	--	--	--	--	--	--	--	--	-	-	-
Unigene0000367	349	14	2.1766	6	0.8239	--	--	--	--	--	--	--	--	--	--	--	--	--	--	--	--	--	--	-	-	-
Unigene0000368	661	35	2.8731	10	0.725	gi|115471671|ref|NP_001059434.1|	112	5e-24	Os07g0407900 [Oryza sativa Japonica Group]	--	--	--	--	--	--	--	--	--	--	--	--	--	--	-	-	-
Unigene0000369	285	6	1.1423	1	0.1681	gi|297596773|ref|NP_001043046.2|	59.3	3e-08	Os01g0368700 [Oryza sativa Japonica Group]	--	--	--	--	--	--	--	--	--	--	--	--	--	--	-	-	-
Unigene0000370	256	7	1.4837	1	0.1872	--	--	--	--	--	--	--	--	--	--	--	--	--	--	--	--	--	--	-	-	-
Unigene0000371	212	7	1.7916	3	0.6781	--	--	--	--	--	--	--	--	--	--	--	--	--	--	--	--	--	--	-	-	-
Unigene0000372	282	4	0.7696	1	0.1699	gi|225443375|ref|XP_002267010.1|	75.1	5e-13	PREDICTED: RNA pseudourine synthase 3, mitochondrial-like [Vitis vinifera]	sp|Q5XET6|PUS3_ARATH	67.8	2e-11	RNA pseudourine synthase 3, mitochondrial OS=Arabidopsis thaliana GN=At1g78910 PE=2 SV=1	--	--	--	--	--	--	--	--	--	--	-	-	-
Unigene0000373	535	16	1.6227	7	0.627	--	--	--	--	--	--	--	--	--	--	--	--	--	--	--	--	--	--	-	-	-
Unigene0000374	218	4	0.9956	1	0.2198	--	--	--	--	--	--	--	--	--	--	--	--	--	--	--	--	--	--	-	-	-
Unigene0000375	681	33	2.6293	7	0.4926	gi|159475212|ref|XP_001695717.1|	54.7	2e-06	heat shock protein 22C [Chlamydomonas reinhardtii]	sp|P19752|HSP30_NEUCR	137	5e-32	30 kDa heat shock protein OS=Neurospora crassa (strain ATCC 24698 / 74-OR23-1A / CBS 708.71 / DSM 1257 / FGSC 987) GN=hsp30 PE=3 SV=1	--	--	--	--	--	--	--	--	--	--	-	-	-
Unigene0000376	477	11	1.2513	8	0.8037	gi|508707134|gb|EOX99030.1|	243	1e-63	Leucine-rich repeat (LRR) family protein [Theobroma cacao]	sp|Q9M0G7|PXL2_ARATH	95.1	2e-19	Leucine-rich repeat receptor-like protein kinase PXL2 OS=Arabidopsis thaliana GN=PXL2 PE=2 SV=1	MA2301_1	55.8	3e-08	COG4886	Leucine-rich repeat (LRR) protein	--	--	--	--	--	-	-	-
Unigene0000377	227	5	1.1952	0	0	gi|508786592|gb|EOY33848.1|	82.4	3e-15	Uncharacterized protein isoform 1 [Theobroma cacao]	--	--	--	--	--	--	--	--	--	--	--	--	--	--	-	-	-
Unigene0000378	375	5	0.7235	6	0.7667	--	--	--	--	--	--	--	--	--	--	--	--	--	--	--	--	--	--	-	-	-
Unigene0000379	422	12	1.5429	2	0.2271	gi|508708318|gb|EOY00215.1|	186	1e-46	DNA/RNA polymerases superfamily protein [Theobroma cacao]	--	--	--	--	--	--	--	--	--	--	--	--	--	--	-	-	-
Unigene0000380	292	5	0.9291	3	0.4923	--	--	--	--	--	--	--	--	--	--	--	--	--	--	--	--	--	--	-	-	-
Unigene0000381	258	9	1.8928	1	0.1857	gi|508707032|gb|EOX98928.1|	150	1e-35	Pectin lyase-like superfamily protein isoform 3 [Theobroma cacao]	sp|Q6H9K0|PGLR2_PLAAC	118	1e-26	Exopolygalacturonase (Fragment) OS=Platanus acerifolia GN=plaa2 PE=1 SV=1	--	--	--	--	--	--	--	--	--	--	-	-	-
Unigene0000382	244	4	0.8895	1	0.1964	gi|357451937|ref|XP_003596245.1|	75.9	3e-13	Receptor-like protein kinase [Medicago truncatula]	--	--	--	--	--	--	--	--	--	--	--	--	--	--	-	-	-
Unigene0000383	201	5	1.3498	2	0.4768	--	--	--	--	--	--	--	--	--	--	--	--	--	--	--	--	--	--	-	-	-
Unigene0000384	357	7	1.0639	0	0	--	--	--	--	--	--	--	--	--	--	--	--	--	--	--	--	--	--	-	-	-
Unigene0000385	203	6	1.6037	1	0.2361	--	--	--	--	--	--	--	--	--	--	--	--	--	--	--	--	--	--	-	-	-
Unigene0000386	294	10	1.8456	3	0.489	--	--	--	--	--	--	--	--	--	--	--	--	--	--	--	--	--	--	-	-	-
Unigene0000387	279	10	1.9448	1	0.1718	gi|359481718|ref|XP_002275435.2|	152	2e-36	PREDICTED: LOW QUALITY PROTEIN: glutathione S-transferase U8 [Vitis vinifera]	sp|P32110|GSTX6_SOYBN	120	2e-27	Probable glutathione S-transferase OS=Glycine max GN=HSP26-A PE=2 SV=1	--	--	--	--	--	K00799	3e-31	133	vvi:100251970	glutathione S-transferase [EC:2.5.1.18]	-	-	-
Unigene0000388	203	4	1.0692	1	0.2361	gi|359483198|ref|XP_002271405.2|	87.8	7e-17	PREDICTED: probable LRR receptor-like serine/threonine-protein kinase At3g47570-like [Vitis vinifera]	sp|Q9SYM9|Y1853_ARATH	52.4	9e-07	Receptor-like serine/threonine-protein kinase At1g78530 OS=Arabidopsis thaliana GN=At1g78530 PE=2 SV=1	--	--	--	--	--	--	--	--	--	--	-	-	-
Unigene0000389	216	0	0	0	0	--	--	--	--	--	--	--	--	--	--	--	--	--	--	--	--	--	--	-	-	-
Unigene0000390	232	8	1.871	0	0	gi|508737356|dbj|BAN33741.1|	150	9e-36	alpha tubulin, partial [Achnanthes kuwaitensis]	sp|P52273|TBA_BOMMO	156	5e-38	Tubulin alpha chain OS=Bombyx mori PE=2 SV=1	SPBC800.05c	133	7e-32	COG5023	Tubulin	K07374	2e-32	136	cre:CHLREDRAFT_128523	tubulin alpha	-	-	-
Unigene0000391	262	6	1.2426	0	0	--	--	--	--	--	--	--	--	--	--	--	--	--	--	--	--	--	--	-	-	-
Unigene0000392	501	16	1.7329	10	0.9565	gi|508784081|gb|EOY31337.1|	323	1e-87	SWIM zinc finger family protein isoform 2 [Theobroma cacao]	--	--	--	--	--	--	--	--	--	--	--	--	--	--	-	-	-
Unigene0000393	322	9	1.5166	4	0.5953	gi|508778643|gb|EOY25899.1|	174	7e-43	Pentatricopeptide repeat superfamily protein [Theobroma cacao]	sp|O82380|PP175_ARATH	117	2e-26	Pentatricopeptide repeat-containing protein At2g29760, chloroplastic OS=Arabidopsis thaliana GN=PCMP-H33 PE=2 SV=1	--	--	--	--	--	--	--	--	--	--	-	-	-
Unigene0000394	222	4	0.9777	0	0	--	--	--	--	--	--	--	--	--	--	--	--	--	--	--	--	--	--	-	-	-
Unigene0000395	298	4	0.7283	2	0.3216	--	--	--	--	--	--	--	--	--	--	--	--	--	--	--	--	--	--	-	-	-
Unigene0000396	377	9	1.2953	1	0.1271	--	--	--	--	--	--	--	--	--	--	--	--	--	--	--	--	--	--	-	-	-
Unigene0000397	323	5	0.8399	1	0.1484	--	--	--	--	--	--	--	--	--	--	--	--	--	--	--	--	--	--	-	-	-
Unigene0000398	602	23	2.0731	10	0.796	gi|224074429|ref|XP_002304369.1|	203	2e-51	nbs-lrr resistance protein [Populus trichocarpa]	sp|Q8VZC7|DRL36_ARATH	146	9e-35	Probable disease resistance protein At5g45510 OS=Arabidopsis thaliana GN=At5g45510 PE=1 SV=2	--	--	--	--	--	K06685	7e-31	133	ath:AT4G19050	maintenance of ploidy protein MOB1 (MPS1 binder 1)	-	-	-
Unigene0000399	264	4	0.8221	2	0.363	gi|359483174|ref|XP_002262904.2|	107	1e-22	PREDICTED: LRR receptor-like serine/threonine-protein kinase GSO1 [Vitis vinifera]	sp|Q9ZVR7|PSKR1_ARATH	57.8	2e-08	Phytosulfokine receptor 1 OS=Arabidopsis thaliana GN=PSKR1 PE=2 SV=4	--	--	--	--	--	--	--	--	--	--	-	-	-
Unigene0000400	219	3	0.7433	0	0	gi|356561592|ref|XP_003549065.1|	58.9	3e-08	PREDICTED: LRR receptor-like serine/threonine-protein kinase GSO2-like [Glycine max]	--	--	--	--	--	--	--	--	--	--	--	--	--	--	-	-	-
Unigene0000401	201	3	0.8099	0	0	--	--	--	--	--	--	--	--	--	--	--	--	--	--	--	--	--	--	-	-	-
Unigene0000402	224	4	0.9689	3	0.6418	--	--	--	--	--	--	--	--	--	--	--	--	--	--	--	--	--	--	-	-	-
Unigene0000403	218	3	0.7467	1	0.2198	--	--	--	--	--	--	--	--	--	--	--	--	--	--	--	--	--	--	-	-	-
Unigene0000404	239	7	1.5892	0	0	gi|508709855|gb|EOY01752.1|	135	2e-31	Alpha-1,4 glucan phosphorylase L isozyme, chloroplastic/amyloplastic isoform 2 [Theobroma cacao]	sp|P53535|PHSL2_SOLTU	134	2e-31	Alpha-1,4 glucan phosphorylase L-2 isozyme, chloroplastic/amyloplastic OS=Solanum tuberosum GN=STP-1 PE=1 SV=1	Cgl1277	89.7	1e-18	COG0058	Glucan phosphorylase	K00688	9e-32	134	vvi:100245621	starch phosphorylase [EC:2.4.1.1]	-	-	-
Unigene0000405	228	5	1.1899	0	0	gi|508707990|gb|EOX99886.1|	105	2e-22	Ribosomal protein L22p/L17e family protein isoform 2 [Theobroma cacao]	sp|Q5UAS2|RL17_BOMMO	140	2e-33	60S ribosomal protein L17 OS=Bombyx mori GN=RpL17 PE=2 SV=1	SPBC2F12.04	77.4	6e-15	COG0091	Ribosomal protein L22	K02880	2e-22	103	pop:POPTR_230092	large subunit ribosomal protein L17e	-	-	-
Unigene0000406	202	6	1.6117	0	0	gi|384248529|gb|EIE22013.1|	95.9	3e-19	ribosomal protein L17 component of cytosolic 80S ribosome and 60S large subunit [Coccomyxa subellipsoidea C-169]	sp|Q5MGD1|RL17_LONON	136	4e-32	60S ribosomal protein L17 OS=Lonomia obliqua GN=RpL17 PE=2 SV=1	SPBC2F12.04	95.1	3e-20	COG0091	Ribosomal protein L22	K02880	6e-21	99	zma:100382652	large subunit ribosomal protein L17e	-	-	-
Unigene0000407	206	4	1.0536	6	1.3958	gi|1545805|dbj|BAA10929.1|	53.9	9e-12	cytochrome P450 like_TBP [Nicotiana tabacum]	--	--	--	--	--	--	--	--	--	--	--	--	--	--	-	-	-
Unigene0000408	598	7	0.6352	2	0.1603	gi|508698774|gb|EOX90670.1|	177	1e-43	Kinase superfamily protein, 32 [Theobroma cacao]	sp|Q8H186|Y3545_ARATH	154	4e-37	Probable receptor-like protein kinase At3g55450 OS=Arabidopsis thaliana GN=At3g55450 PE=1 SV=1	--	--	--	--	--	--	--	--	--	--	-	-	-
Unigene0000409	315	6	1.0335	2	0.3043	--	--	--	--	--	--	--	--	--	--	--	--	--	--	--	--	--	--	-	-	-
Unigene0000410	425	27	3.4471	0	0	--	--	--	--	--	--	--	--	--	--	--	--	--	--	--	--	--	--	-	-	-
Unigene0000411	241	3	0.6754	4	0.7954	--	--	--	--	--	--	--	--	--	--	--	--	--	--	--	--	--	--	-	-	-
Unigene0000412	422	10	1.2858	3	0.3407	gi|508778024|gb|EOY25280.1|	220	7e-57	DNA-methyltransferase CMT2 [Theobroma cacao]	sp|Q94F87|CMT2_ARATH	185	9e-47	DNA (cytosine-5)-methyltransferase CMT2 OS=Arabidopsis thaliana GN=CMT2 PE=2 SV=3	--	--	--	--	--	K00558	1e-60	230	rcu:RCOM_0868250	DNA (cytosine-5-)-methyltransferase [EC:2.1.1.37]	-	-	-
Unigene0000413	242	6	1.3453	4	0.7921	gi|470145375|ref|XP_004308315.1|	111	6e-24	PREDICTED: pentatricopeptide repeat-containing protein At4g01030, mitochondrial-like [Fragaria vesca subsp. vesca]	sp|Q9SV26|PP297_ARATH	90.9	2e-18	Pentatricopeptide repeat-containing protein At4g01030, mitochondrial OS=Arabidopsis thaliana GN=PCMP-H65 PE=3 SV=2	--	--	--	--	--	--	--	--	--	--	-	-	-
Unigene0000414	236	2	0.4598	0	0	gi|508713450|gb|EOY05347.1|	62.8	2e-09	F-box family protein [Theobroma cacao]	--	--	--	--	--	--	--	--	--	--	--	--	--	--	-	-	-
Unigene0000415	277	4	0.7835	2	0.346	--	--	--	--	--	--	--	--	--	--	--	--	--	--	--	--	--	--	-	-	-
Unigene0000416	253	5	1.0723	1	0.1894	--	--	--	--	--	--	--	--	--	--	--	--	--	--	--	--	--	--	-	-	-
Unigene0000417	230	4	0.9437	0	0	--	--	--	--	--	--	--	--	--	--	--	--	--	--	--	--	--	--	-	-	-
Unigene0000418	204	4	1.0639	1	0.2349	--	--	--	--	--	--	--	--	--	--	--	--	--	--	--	--	--	--	-	-	-
Unigene0000419	202	3	0.8058	1	0.2372	--	--	--	--	--	--	--	--	--	--	--	--	--	--	--	--	--	--	-	-	-
Unigene0000420	231	5	1.1745	2	0.4149	gi|508725310|gb|EOY17207.1|	51.2	7e-06	DNAJ heat shock N-terminal domain-containing protein isoform 3 [Theobroma cacao]	--	--	--	--	--	--	--	--	--	--	--	--	--	--	-	-	-
Unigene0000421	210	2	0.5168	4	0.9128	gi|508780668|gb|EOY27924.1|	92.4	3e-18	AAA-type ATPase family protein isoform 3 [Theobroma cacao]	--	--	--	--	--	--	--	--	--	--	--	--	--	--	-	-	-
Unigene0000422	204	5	1.3299	2	0.4698	--	--	--	--	--	--	--	--	--	--	--	--	--	--	--	--	--	--	-	-	-
Unigene0000423	268	9	1.8222	3	0.5364	--	--	--	--	--	--	--	--	--	--	--	--	--	--	--	--	--	--	-	-	-
Unigene0000424	259	6	1.257	2	0.37	--	--	--	--	--	--	--	--	--	--	--	--	--	--	--	--	--	--	-	-	-
Unigene0000425	768	28	1.9782	8	0.4992	gi|508727954|gb|EOY19851.1|	59.7	4e-12	Zinc finger, CCHC-type-like protein [Theobroma cacao]	--	--	--	--	--	--	--	--	--	--	--	--	--	--	-	-	-
Unigene0000426	204	3	0.7979	0	0	--	--	--	--	--	--	--	--	--	--	--	--	--	--	--	--	--	--	-	-	-
Unigene0000427	230	12	2.831	0	0	--	--	--	--	--	--	--	--	--	--	--	--	--	--	--	--	--	--	-	-	-
Unigene0000428	558	19	1.8476	4	0.3435	gi|470125069|ref|XP_004298529.1|	219	2e-56	PREDICTED: pentatricopeptide repeat-containing protein At5g61990, mitochondrial-like [Fragaria vesca subsp. vesca]	sp|Q9FIT7|PP442_ARATH	118	2e-26	Pentatricopeptide repeat-containing protein At5g61990, mitochondrial OS=Arabidopsis thaliana GN=At5g61990 PE=2 SV=1	--	--	--	--	--	--	--	--	--	--	-	-	-
Unigene0000429	499	15	1.6311	7	0.6722	--	--	--	--	--	--	--	--	--	--	--	--	--	--	--	--	--	--	-	-	-
Unigene0000430	513	20	2.1154	8	0.7473	--	--	--	--	--	--	--	--	--	--	--	--	--	--	--	--	--	--	-	-	-
Unigene0000431	313	5	0.8668	0	0	--	--	--	--	sp|Q8MP30|Y7791_DICDI	48.5	6e-09	Uncharacterized histidine-rich protein DDB_G0274557 OS=Dictyostelium discoideum GN=DDB_G0274557 PE=4 SV=1	--	--	--	--	--	--	--	--	--	--	-	-	-
Unigene0000432	379	17	2.4338	1	0.1264	--	--	--	--	--	--	--	--	--	--	--	--	--	--	--	--	--	--	-	-	-
Unigene0000433	236	3	0.6897	1	0.2031	--	--	--	--	--	--	--	--	--	--	--	--	--	--	--	--	--	--	-	-	-
Unigene0000434	379	9	1.2885	5	0.6322	--	--	--	--	--	--	--	--	--	--	--	--	--	--	--	--	--	--	-	-	-
Unigene0000435	262	6	1.2426	0	0	--	--	--	--	--	--	--	--	--	--	--	--	--	--	--	--	--	--	-	-	-
Unigene0000436	206	5	1.317	0	0	--	--	--	--	--	--	--	--	--	--	--	--	--	--	--	--	--	--	-	-	-
Unigene0000437	215	2	0.5047	1	0.2229	gi|470111923|ref|XP_004292190.1|	97.8	6e-20	PREDICTED: pentatricopeptide repeat-containing protein At3g22470, mitochondrial-like [Fragaria vesca subsp. vesca]	sp|Q9FLL3|PP412_ARATH	72.8	6e-13	Pentatricopeptide repeat-containing protein At5g41170, mitochondrial OS=Arabidopsis thaliana GN=At5g41170 PE=2 SV=1	--	--	--	--	--	--	--	--	--	--	-	-	-
Unigene0000438	319	7	1.1907	4	0.6009	gi|225447699|ref|XP_002277219.1|	82	4e-15	PREDICTED: G-type lectin S-receptor-like serine/threonine-protein kinase At2g19130 isoform 1 [Vitis vinifera]	sp|O64477|Y2913_ARATH	50.4	3e-06	G-type lectin S-receptor-like serine/threonine-protein kinase At2g19130 OS=Arabidopsis thaliana GN=At2g19130 PE=2 SV=1	--	--	--	--	--	--	--	--	--	--	-	-	-
Unigene0000439	450	10	1.2058	9	0.9584	gi|225447699|ref|XP_002277219.1|	210	7e-54	PREDICTED: G-type lectin S-receptor-like serine/threonine-protein kinase At2g19130 isoform 1 [Vitis vinifera]	sp|O64477|Y2913_ARATH	174	2e-43	G-type lectin S-receptor-like serine/threonine-protein kinase At2g19130 OS=Arabidopsis thaliana GN=At2g19130 PE=2 SV=1	--	--	--	--	--	--	--	--	--	--	-	-	-
Unigene0000440	412	12	1.5804	0	0	gi|460376962|ref|XP_004234265.1|	86.7	1e-16	PREDICTED: LOW QUALITY PROTEIN: G-type lectin S-receptor-like serine/threonine-protein kinase RKS1-like [Solanum lycopersicum]	sp|Q9ZR08|Y4230_ARATH	76.6	5e-14	G-type lectin S-receptor-like serine/threonine-protein kinase At4g03230 OS=Arabidopsis thaliana GN=At4g03230 PE=3 SV=3	--	--	--	--	--	--	--	--	--	--	-	-	-
Unigene0000441	279	8	1.5558	7	1.2023	gi|359491427|ref|XP_002275530.2|	160	6e-39	PREDICTED: carbon catabolite repressor protein 4 homolog 3-like [Vitis vinifera]	sp|Q9LS39|CCR4C_ARATH	139	4e-33	Carbon catabolite repressor protein 4 homolog 3 OS=Arabidopsis thaliana GN=CCR4-3 PE=2 SV=2	--	--	--	--	--	--	--	--	--	--	-	-	-
Unigene0000442	235	9	2.078	4	0.8157	gi|502139767|ref|XP_004503894.1|	132	2e-30	PREDICTED: fatty acid amide hydrolase-like isoform X2 [Cicer arietinum]	sp|Q7XJJ7|FAAH_ARATH	65.9	8e-11	Fatty acid amide hydrolase OS=Arabidopsis thaliana GN=FAAH PE=1 SV=1	--	--	--	--	--	--	--	--	--	--	-	-	-
Unigene0000443	358	13	1.9703	7	0.937	gi|225451112|ref|XP_002267420.1|	182	2e-45	PREDICTED: protein BONZAI 3-like [Vitis vinifera]	sp|Q5XQC7|BON3_ARATH	168	9e-42	Protein BONZAI 3 OS=Arabidopsis thaliana GN=BON3 PE=1 SV=1	--	--	--	--	--	--	--	--	--	--	-	-	-
Unigene0000444	677	22	1.7633	5	0.3539	gi|225457899|ref|XP_002279381.1|	284	1e-75	PREDICTED: GDSL esterase/lipase EXL3 [Vitis vinifera]	sp|Q94CH6|EXL3_ARATH	225	2e-58	GDSL esterase/lipase EXL3 OS=Arabidopsis thaliana GN=EXL3 PE=2 SV=1	all3634	58.9	7e-09	COG3240	Phospholipase/lecithinase/hemolysin	--	--	--	--	--	-	-	-
Unigene0000445	346	10	1.5682	5	0.6925	gi|359492276|ref|XP_003634393.1|	105	3e-22	PREDICTED: GDSL esterase/lipase EXL3-like [Vitis vinifera]	sp|Q94CH6|EXL3_ARATH	105	9e-23	GDSL esterase/lipase EXL3 OS=Arabidopsis thaliana GN=EXL3 PE=2 SV=1	--	--	--	--	--	--	--	--	--	--	-	-	-
Unigene0000446	440	15	1.8498	3	0.3267	gi|508705988|gb|EOX97884.1|	87	1e-16	MATE efflux family protein 4 isoform 4, partial [Theobroma cacao]	sp|Q8W4G3|MATE4_ARATH	74.3	3e-13	MATE efflux family protein 4, chloroplastic OS=Arabidopsis thaliana GN=DTX46 PE=2 SV=1	--	--	--	--	--	--	--	--	--	--	-	-	-
Unigene0000447	474	20	2.2895	0	0	gi|508717912|gb|EOY09809.1|	189	2e-47	Translation protein SH3-like family protein [Theobroma cacao]	sp|Q95WA0|RL26_LITLI	225	1e-58	60S ribosomal protein L26 OS=Littorina littorea GN=RPL26 PE=2 SV=1	SPBC29B5.03c	152	2e-37	COG0198	Ribosomal protein L24	K02898	5e-48	189	rcu:RCOM_0580190	large subunit ribosomal protein L26e	-	-	-
Unigene0000448	297	5	0.9135	2	0.3227	--	--	--	--	--	--	--	--	--	--	--	--	--	--	--	--	--	--	-	-	-
Unigene0000449	202	4	1.0745	3	0.7117	--	--	--	--	--	--	--	--	--	--	--	--	--	--	--	--	--	--	-	-	-
Unigene0000450	223	4	0.9733	4	0.8596	gi|470144241|ref|XP_004307769.1|	86.3	2e-16	PREDICTED: LRR receptor-like serine/threonine-protein kinase GSO1-like [Fragaria vesca subsp. vesca]	--	--	--	--	--	--	--	--	--	--	--	--	--	--	-	-	-
Unigene0000451	257	5	1.0556	2	0.3729	gi|470104618|ref|XP_004288695.1|	155	2e-37	PREDICTED: DNA mismatch repair protein MSH7-like [Fragaria vesca subsp. vesca]	sp|Q9SMV7|MSH7_ARATH	145	1e-34	DNA mismatch repair protein MSH7 OS=Arabidopsis thaliana GN=MSH7 PE=1 SV=1	PA3620	95.9	2e-20	COG0249	Mismatch repair ATPase (MutS family)	--	--	--	--	--	-	-	-
Unigene0000452	279	2	0.389	0	0	--	--	--	--	--	--	--	--	--	--	--	--	--	--	--	--	--	--	-	-	-
Unigene0000453	219	7	1.7343	1	0.2188	--	--	--	--	--	--	--	--	--	--	--	--	--	--	--	--	--	--	-	-	-
Unigene0000454	215	3	0.7571	1	0.2229	--	--	--	--	--	--	--	--	--	--	--	--	--	--	--	--	--	--	-	-	-
Unigene0000455	446	16	1.9466	2	0.2149	--	--	--	--	--	--	--	--	--	--	--	--	--	--	--	--	--	--	-	-	-
Unigene0000456	271	6	1.2013	3	0.5305	--	--	--	--	--	--	--	--	--	--	--	--	--	--	--	--	--	--	-	-	-
Unigene0000457	501	11	1.1913	5	0.4783	--	--	--	--	--	--	--	--	--	--	--	--	--	--	--	--	--	--	-	-	-
Unigene0000458	243	6	1.3398	5	0.986	--	--	--	--	--	--	--	--	--	--	--	--	--	--	--	--	--	--	-	-	-
Unigene0000459	452	13	1.5606	4	0.4241	gi|359487624|ref|XP_002279606.2|	145	4e-34	PREDICTED: ATP-dependent DNA helicase Q-like SIM-like [Vitis vinifera]	sp|Q9FT69|RQSIM_ARATH	81.6	2e-15	ATP-dependent DNA helicase Q-like SIM OS=Arabidopsis thaliana GN=RECQSIM PE=2 SV=1	--	--	--	--	--	--	--	--	--	--	-	-	-
Unigene0000460	214	3	0.7607	1	0.2239	--	--	--	--	--	--	--	--	--	--	--	--	--	--	--	--	--	--	-	-	-
Unigene0000461	244	4	0.8895	3	0.5892	--	--	--	--	--	--	--	--	--	--	--	--	--	--	--	--	--	--	-	-	-
Unigene0000462	211	2	0.5143	0	0	--	--	--	--	--	--	--	--	--	--	--	--	--	--	--	--	--	--	-	-	-
Unigene0000463	316	3	0.5151	2	0.3033	gi|508782021|gb|EOY29277.1|	45.4	2e-07	PAB-dependent poly(A)-specific ribonuclease subunit PAN3 [Theobroma cacao]	--	--	--	--	--	--	--	--	--	--	--	--	--	--	-	-	-
Unigene0000464	348	13	2.027	9	1.2393	--	--	--	--	--	--	--	--	--	--	--	--	--	--	--	--	--	--	-	-	-
Unigene0000465	472	18	2.0692	6	0.6092	gi|359486075|ref|XP_002273047.2|	141	6e-33	PREDICTED: TMV resistance protein N-like [Vitis vinifera]	sp|Q9SZ67|WRK19_ARATH	99.8	7e-21	Probable WRKY transcription factor 19 OS=Arabidopsis thaliana GN=WRKY19 PE=2 SV=1	--	--	--	--	--	--	--	--	--	--	-	-	-
Unigene0000466	294	2	0.3691	1	0.163	--	--	--	--	--	--	--	--	--	--	--	--	--	--	--	--	--	--	-	-	-
Unigene0000467	248	2	0.4376	1	0.1932	--	--	--	--	--	--	--	--	--	--	--	--	--	--	--	--	--	--	-	-	-
Unigene0000468	221	6	1.4731	5	1.0842	--	--	--	--	--	--	--	--	--	--	--	--	--	--	--	--	--	--	-	-	-
Unigene0000469	215	3	0.7571	2	0.4458	--	--	--	--	--	--	--	--	--	--	--	--	--	--	--	--	--	--	-	-	-
Unigene0000470	237	3	0.6868	0	0	gi|357436123|ref|XP_003588337.1|	70.1	1e-11	Ribosomal protein S10 [Medicago truncatula]	--	--	--	--	--	--	--	--	--	--	--	--	--	--	-	-	-
Unigene0000471	233	8	1.863	2	0.4113	--	--	--	--	--	--	--	--	--	--	--	--	--	--	--	--	--	--	-	-	-
Unigene0000472	258	4	0.8412	1	0.1857	--	--	--	--	--	--	--	--	--	--	--	--	--	--	--	--	--	--	-	-	-
Unigene0000473	213	6	1.5285	2	0.45	gi|508725321|gb|EOY17218.1|	62.4	3e-09	Erythroid differentiation-related factor 1 [Theobroma cacao]	--	--	--	--	--	--	--	--	--	--	--	--	--	--	-	-	-
Unigene0000474	300	4	0.7235	0	0	--	--	--	--	--	--	--	--	--	--	--	--	--	--	--	--	--	--	-	-	-
Unigene0000475	257	3	0.6334	1	0.1865	gi|124359549|gb|ABD28670.2|	52	4e-06	RNA-directed DNA polymerase (Reverse transcriptase) [Medicago truncatula]	--	--	--	--	--	--	--	--	--	--	--	--	--	--	-	-	-
Unigene0000476	236	3	0.6897	1	0.2031	gi|359484014|ref|XP_002272664.2|	68.2	6e-11	PREDICTED: probable LRR receptor-like serine/threonine-protein kinase At1g56140 [Vitis vinifera]	--	--	--	--	--	--	--	--	--	--	--	--	--	--	-	-	-
Unigene0000477	234	3	0.6956	3	0.6144	gi|449503265|ref|XP_004161916.1|	109	2e-23	PREDICTED: uncharacterized LOC101205603, partial [Cucumis sativus]	--	--	--	--	--	--	--	--	--	--	--	--	--	--	-	-	-
Unigene0000478	206	8	2.1072	6	1.3958	--	--	--	--	--	--	--	--	--	--	--	--	--	--	--	--	--	--	-	-	-
Unigene0000479	210	6	1.5503	0	0	gi|224092109|ref|XP_002309476.1|	92	4e-18	predicted protein [Populus trichocarpa]	--	--	--	--	--	--	--	--	--	--	--	--	--	--	-	-	-
Unigene0000480	250	4	0.8682	2	0.3834	--	--	--	--	--	--	--	--	--	--	--	--	--	--	--	--	--	--	-	-	-
Unigene0000481	228	10	2.3798	4	0.8407	--	--	--	--	--	--	--	--	--	--	--	--	--	--	--	--	--	--	-	-	-
Unigene0000482	225	6	1.4469	3	0.6389	--	--	--	--	--	--	--	--	--	--	--	--	--	--	--	--	--	--	-	-	-
Unigene0000483	207	4	1.0485	0	0	--	--	--	--	--	--	--	--	--	--	--	--	--	--	--	--	--	--	-	-	-
Unigene0000484	491	13	1.4366	7	0.6832	gi|224122712|ref|XP_002318907.1|	174	5e-43	cc-nbs-lrr resistance protein [Populus trichocarpa]	sp|Q7XBQ9|RGA2_SOLBU	87	5e-17	Disease resistance protein RGA2 OS=Solanum bulbocastanum GN=RGA2 PE=1 SV=1	--	--	--	--	--	--	--	--	--	--	-	-	-
Unigene0000485	211	10	2.5716	3	0.6813	--	--	--	--	--	--	--	--	--	--	--	--	--	--	--	--	--	--	-	-	-
Unigene0000486	265	8	1.638	4	0.7233	--	--	--	--	--	--	--	--	--	--	--	--	--	--	--	--	--	--	-	-	-
Unigene0000487	330	9	1.4798	1	0.1452	--	--	--	--	--	--	--	--	--	--	--	--	--	--	--	--	--	--	-	-	-
Unigene0000488	428	10	1.2678	1	0.112	--	--	--	--	--	--	--	--	--	--	--	--	--	--	--	--	--	--	-	-	-
Unigene0000489	263	6	1.2379	1	0.1822	gi|502148906|ref|XP_004507316.1|	127	1e-28	PREDICTED: beta-glucosidase 12-like [Cicer arietinum]	sp|P26205|BGLT_TRIRP	122	6e-28	Cyanogenic beta-glucosidase (Fragment) OS=Trifolium repens GN=LI PE=1 SV=1	CAC0385	82.4	2e-16	COG2723	Beta-glucosidase/6-phospho-beta-glucosidase/beta-galactosidase	--	--	--	--	--	-	-	-
Unigene0000490	357	16	2.4318	7	0.9396	gi|60417424|emb|CAI47559.1|	160	8e-39	alpha galactosidase [Coffea arabica]	sp|Q42656|AGAL_COFAR	150	3e-36	Alpha-galactosidase OS=Coffea arabica PE=1 SV=1	--	--	--	--	--	K07407	5e-36	149	rcu:RCOM_0612700	alpha-galactosidase [EC:3.2.1.22]	-	-	-
Unigene0000491	478	12	1.3622	8	0.802	--	--	--	--	--	--	--	--	--	--	--	--	--	--	--	--	--	--	-	-	-
Unigene0000492	654	30	2.489	10	0.7327	gi|470120908|ref|XP_004296529.1|	192	4e-48	PREDICTED: cysteine-rich repeat secretory protein 3-like [Fragaria vesca subsp. vesca]	sp|Q6E263|CRR39_ARATH	180	6e-45	Cysteine-rich repeat secretory protein 39 OS=Arabidopsis thaliana GN=CRRSP39 PE=2 SV=2	--	--	--	--	--	--	--	--	--	--	-	-	-
Unigene0000493	502	16	1.7294	0	0	--	--	--	--	--	--	--	--	--	--	--	--	--	--	--	--	--	--	-	-	-
Unigene0000494	208	7	1.8261	4	0.9216	gi|225425162|ref|XP_002263688.1|	70.5	1e-11	PREDICTED: somatic embryogenesis receptor kinase 1 [Vitis vinifera]	--	--	--	--	--	--	--	--	--	--	--	--	--	--	-	-	-
Unigene0000495	264	8	1.6442	5	0.9076	--	--	--	--	--	--	--	--	--	--	--	--	--	--	--	--	--	--	-	-	-
Unigene0000496	202	3	0.8058	3	0.7117	--	--	--	--	--	--	--	--	--	--	--	--	--	--	--	--	--	--	-	-	-
Unigene0000497	399	13	1.7679	0	0	gi|301120388|ref|XP_002907921.1|	162	2e-39	polyadenylate-binding protein 1-B [Phytophthora infestans T30-4]	sp|Q13310|PABP4_HUMAN	220	2e-57	Polyadenylate-binding protein 4 OS=Homo sapiens GN=PABPC4 PE=1 SV=1	SPAC1610.03c	71.2	4e-13	COG0724	RNA-binding proteins (RRM domain)	K13126	3e-39	159	ppp:PHYPADRAFT_170712	polyadenylate-binding protein	-	-	-
Unigene0000498	486	20	2.2329	0	0	gi|357145576|ref|XP_003573691.1|	191	5e-48	PREDICTED: polyadenylate-binding protein 2-like [Brachypodium distachyon]	sp|P21187|PABP_DROME	259	4e-69	Polyadenylate-binding protein OS=Drosophila melanogaster GN=pAbp PE=1 SV=3	SPAC140.02	63.5	2e-10	COG0724	RNA-binding proteins (RRM domain)	K13126	3e-48	190	osa:4345242	polyadenylate-binding protein	-	-	-
Unigene0000499	234	10	2.3188	5	1.024	gi|42573586|ref|NP_974889.1|	75.5	4e-13	proteasome component (PCI) domain-containing protein [Arabidopsis thaliana]	--	--	--	--	--	--	--	--	--	K03039	6e-14	75.5	ath:AT5G45620	26S proteasome regulatory subunit N9	-	-	-
Unigene0000500	219	3	0.7433	1	0.2188	--	--	--	--	--	--	--	--	--	--	--	--	--	--	--	--	--	--	-	-	-
Unigene0000501	303	6	1.0745	4	0.6326	gi|225442667|ref|XP_002284745.1|	119	2e-26	PREDICTED: MAR-binding filament-like protein 1-1-like [Vitis vinifera]	sp|Q9LW85|MFP1_ARATH	109	6e-24	MAR-binding filament-like protein 1 OS=Arabidopsis thaliana GN=MFP1 PE=1 SV=2	TM1182	47.8	5e-06	COG1196	Chromosome segregation ATPases	--	--	--	--	--	-	-	-
Unigene0000502	275	7	1.3812	6	1.0455	gi|470138439|ref|XP_004304964.1|	169	1e-41	PREDICTED: ABC transporter B family member 15-like [Fragaria vesca subsp. vesca]	sp|Q9LHD1|AB15B_ARATH	167	3e-41	ABC transporter B family member 15 OS=Arabidopsis thaliana GN=ABCB15 PE=1 SV=1	BH0713	55.1	3e-08	COG1132	ABC-type multidrug transport system, ATPase and permease components	--	--	--	--	--	-	-	-
Unigene0000503	653	15	1.2464	2	0.1468	gi|508727890|gb|EOY19787.1|	206	3e-52	Cytochrome P450 [Theobroma cacao]	sp|P24465|C71A1_PERAE	171	5e-42	Cytochrome P450 71A1 OS=Persea americana GN=CYP71A1 PE=1 SV=2	slr0574	60.1	3e-09	COG2124	Cytochrome P450	--	--	--	--	--	-	-	-
Unigene0000504	242	4	0.8969	0	0	gi|326523605|dbj|BAJ92973.1|	94	9e-19	predicted protein [Hordeum vulgare subsp. vulgare]	sp|Q9GPH3|ATFC_BOMMO	99	8e-21	Activating transcription factor of chaperone OS=Bombyx mori GN=ATFC PE=2 SV=1	--	--	--	--	--	--	--	--	--	--	-	-	-
Unigene0000505	389	3	0.4185	1	0.1232	gi|225458341|ref|XP_002281648.1|	104	5e-22	PREDICTED: cytochrome P450 734A1 [Vitis vinifera]	sp|Q8LIF2|C7345_ORYSJ	68.2	2e-11	Cytochrome P450 734A5 OS=Oryza sativa subsp. japonica GN=CYP734A5 PE=2 SV=1	--	--	--	--	--	--	--	--	--	--	-	-	-
Unigene0000506	243	6	1.3398	1	0.1972	--	--	--	--	--	--	--	--	--	--	--	--	--	--	--	--	--	--	-	-	-
Unigene0000507	213	5	1.2737	5	1.1249	--	--	--	--	--	--	--	--	--	--	--	--	--	--	--	--	--	--	-	-	-
Unigene0000508	313	6	1.0401	2	0.3062	gi|508718778|gb|EOY10675.1|	192	3e-48	Pyruvate kinase family protein [Theobroma cacao]	sp|Q42954|KPYC_TOBAC	180	3e-45	Pyruvate kinase, cytosolic isozyme OS=Nicotiana tabacum PE=2 SV=1	VC0485	89.7	1e-18	COG0469	Pyruvate kinase	K00873	1e-48	190	rcu:RCOM_1122030	pyruvate kinase [EC:2.7.1.40]	-	-	-
Unigene0000509	414	14	1.8349	2	0.2315	gi|508783378|gb|EOY30634.1|	244	6e-64	Iq-domain 31 [Theobroma cacao]	--	--	--	--	--	--	--	--	--	--	--	--	--	--	-	-	-
Unigene0000510	305	5	0.8895	0	0	gi|449456927|ref|XP_004146200.1|	122	3e-27	PREDICTED: transcription factor bHLH157-like [Cucumis sativus]	sp|Q7XJU0|LHWL2_ARATH	82.4	8e-16	Transcription factor bHLH157 OS=Arabidopsis thaliana GN=BHLH157 PE=2 SV=1	--	--	--	--	--	--	--	--	--	--	-	-	-
Unigene0000511	211	7	1.8001	1	0.2271	gi|502116126|ref|XP_004495317.1|	82	4e-15	PREDICTED: ethylene-responsive transcription factor ERF096-like [Cicer arietinum]	sp|Q9LSX0|ERF96_ARATH	71.2	2e-12	Ethylene-responsive transcription factor ERF096 OS=Arabidopsis thaliana GN=ERF096 PE=2 SV=1	--	--	--	--	--	--	--	--	--	--	-	-	-
Unigene0000512	285	5	0.9519	3	0.5044	--	--	--	--	--	--	--	--	--	--	--	--	--	--	--	--	--	--	-	-	-
Unigene0000513	273	3	0.5963	1	0.1755	--	--	--	--	--	--	--	--	--	--	--	--	--	--	--	--	--	--	-	-	-
Unigene0000514	206	3	0.7902	1	0.2326	--	--	--	--	--	--	--	--	--	--	--	--	--	--	--	--	--	--	-	-	-
Unigene0000515	246	5	1.1028	7	1.3636	--	--	--	--	--	--	--	--	--	--	--	--	--	--	--	--	--	--	-	-	-
Unigene0000516	210	4	1.0335	0	0	--	--	--	--	--	--	--	--	--	--	--	--	--	--	--	--	--	--	-	-	-
Unigene0000517	268	7	1.4172	3	0.5364	gi|224062173|ref|XP_002300789.1|	97.1	1e-19	cytochrome P450 [Populus trichocarpa]	sp|P98188|C94A2_VICSA	80.5	3e-15	Cytochrome P450 94A2 OS=Vicia sativa GN=CYP94A2 PE=2 SV=1	--	--	--	--	--	--	--	--	--	--	-	-	-
Unigene0000518	238	4	0.9119	0	0	gi|508725219|gb|EOY17116.1|	119	3e-26	Cysteine-rich RLK (RECEPTOR-like protein kinase) 8 [Theobroma cacao]	sp|P10978|POLX_TOBAC	65.5	1e-10	Retrovirus-related Pol polyprotein from transposon TNT 1-94 OS=Nicotiana tabacum PE=2 SV=1	--	--	--	--	--	--	--	--	--	--	-	-	-
Unigene0000519	233	3	0.6986	0	0	gi|508700003|gb|EOX91899.1|	67	1e-10	Methylmalonate-semialdehyde dehydrogenase [Theobroma cacao]	--	--	--	--	--	--	--	--	--	K00140	2e-09	60.5	rcu:RCOM_0818840	methylmalonate-semialdehyde dehydrogenase [EC:1.2.1.27]	-	-	-
Unigene0000520	238	4	0.9119	0	0	--	--	--	--	--	--	--	--	--	--	--	--	--	--	--	--	--	--	-	-	-
Unigene0000521	810	17	1.1388	5	0.2958	gi|470106550|ref|XP_004289631.1|	271	1e-71	PREDICTED: CASP-like protein Os03g0767900-like [Fragaria vesca subsp. vesca]	sp|Q10EJ2|CSPLU_ORYSJ	214	6e-55	CASP-like protein Os03g0767900 OS=Oryza sativa subsp. japonica GN=Os03g0767900 PE=2 SV=1	--	--	--	--	--	--	--	--	--	--	-	-	-
Unigene0000522	491	20	2.2102	10	0.976	gi|508786787|gb|EOY34043.1|	55.8	4e-07	Fasciclin-like arabinogalactan family protein [Theobroma cacao]	--	--	--	--	--	--	--	--	--	--	--	--	--	--	-	-	-
Unigene0000523	222	3	0.7332	0	0	--	--	--	--	--	--	--	--	--	--	--	--	--	--	--	--	--	--	-	-	-
Unigene0000524	315	6	1.0335	1	0.1521	--	--	--	--	--	--	--	--	--	--	--	--	--	--	--	--	--	--	-	-	-
Unigene0000525	406	16	2.1383	3	0.3541	gi|508779608|gb|EOY26864.1|	174	4e-43	NDH-dependent cyclic electron flow 1 isoform 3 [Theobroma cacao]	--	--	--	--	asl0884	47.4	7e-06	COG0633	Ferredoxin	--	--	--	--	--	-	-	-
Unigene0000526	287	6	1.1344	1	0.167	gi|449516266|ref|XP_004165168.1|	178	4e-44	PREDICTED: arginine decarboxylase-like [Cucumis sativus]	sp|P21885|SPEA_BACSU	78.2	2e-14	Arginine decarboxylase OS=Bacillus subtilis (strain 168) GN=speA PE=1 SV=2	all4887	110	5e-25	COG1982	Arginine/lysine/ornithine decarboxylases	--	--	--	--	--	-	-	-
Unigene0000527	284	10	1.9106	1	0.1687	gi|334186339|ref|NP_192232.5|	96.3	2e-19	G-type lectin S-receptor-like serine/threonine-protein kinase [Arabidopsis thaliana]	sp|Q9ZR08|Y4230_ARATH	96.3	5e-20	G-type lectin S-receptor-like serine/threonine-protein kinase At4g03230 OS=Arabidopsis thaliana GN=At4g03230 PE=3 SV=3	--	--	--	--	--	--	--	--	--	--	-	-	-
Unigene0000528	400	16	2.1704	6	0.7188	gi|449493195|ref|XP_004159218.1|	200	7e-51	PREDICTED: G-type lectin S-receptor-like serine/threonine-protein kinase At4g03230-like, partial [Cucumis sativus]	sp|Q9ZR08|Y4230_ARATH	186	4e-47	G-type lectin S-receptor-like serine/threonine-protein kinase At4g03230 OS=Arabidopsis thaliana GN=At4g03230 PE=3 SV=3	BH2504_1	71.2	5e-13	COG0515	Serine/threonine protein kinase	--	--	--	--	--	-	-	-
Unigene0000529	557	15	1.4612	11	0.9464	gi|508724194|gb|EOY16091.1|	71.6	9e-12	Uncharacterized protein TCM_034969 [Theobroma cacao]	--	--	--	--	--	--	--	--	--	--	--	--	--	--	-	-	-
Unigene0000530	211	3	0.7715	1	0.2271	--	--	--	--	--	--	--	--	--	--	--	--	--	--	--	--	--	--	-	-	-
Unigene0000531	433	11	1.3784	5	0.5534	--	--	--	--	--	--	--	--	--	--	--	--	--	--	--	--	--	--	-	-	-
Unigene0000532	232	5	1.1694	2	0.4131	gi|449488669|ref|XP_004158137.1|	81.6	5e-15	PREDICTED: uncharacterized LOC101210685 [Cucumis sativus]	--	--	--	--	--	--	--	--	--	--	--	--	--	--	-	-	-
Unigene0000533	506	14	1.5013	2	0.1894	gi|508773566|gb|EOY20822.1|	219	2e-56	Ferric reduction oxidase 8 isoform 1 [Theobroma cacao]	sp|Q8VY13|FRO8_ARATH	191	2e-48	Ferric reduction oxidase 8, mitochondrial OS=Arabidopsis thaliana GN=FRO8 PE=2 SV=1	--	--	--	--	--	--	--	--	--	--	-	-	-
Unigene0000534	220	3	0.7399	2	0.4356	--	--	--	--	--	--	--	--	--	--	--	--	--	--	--	--	--	--	-	-	-
Unigene0000535	295	4	0.7357	1	0.1624	--	--	--	--	--	--	--	--	--	--	--	--	--	--	--	--	--	--	-	-	-
Unigene0000536	870	27	1.6839	6	0.3305	gi|508725219|gb|EOY17116.1|	211	2e-53	Cysteine-rich RLK (RECEPTOR-like protein kinase) 8 [Theobroma cacao]	sp|P04146|COPIA_DROME	136	2e-31	Copia protein OS=Drosophila melanogaster GN=GIP PE=1 SV=3	--	--	--	--	--	--	--	--	--	--	-	-	-
Unigene0000537	286	9	1.7075	0	0	gi|460365128|ref|XP_004228456.1|	69.3	2e-11	PREDICTED: 60S acidic ribosomal protein P2B-like [Solanum lycopersicum]	sp|P02399|RLA2_ARTSA	79	9e-15	60S acidic ribosomal protein P2 OS=Artemia salina PE=1 SV=1	SPAC1071.08	62.4	2e-10	COG2058	Ribosomal protein L12E/L44/L45/RPP1/RPP2	K02943	1e-11	67.8	rcu:RCOM_0792560	large subunit ribosomal protein LP2	-	-	-
Unigene0000538	230	6	1.4155	3	0.6251	--	--	--	--	--	--	--	--	--	--	--	--	--	--	--	--	--	--	-	-	-
Unigene0000539	226	6	1.4405	2	0.4241	--	--	--	--	--	--	--	--	--	--	--	--	--	--	--	--	--	--	-	-	-
Unigene0000540	238	4	0.9119	0	0	gi|508705851|gb|EOX97747.1|	88.2	5e-17	Amidase family protein [Theobroma cacao]	--	--	--	--	--	--	--	--	--	--	--	--	--	--	-	-	-
Unigene0000541	233	6	1.3973	0	0	gi|508718575|gb|EOY10472.1|	132	2e-30	Amidase family protein isoform 4 [Theobroma cacao]	sp|Q3ISR6|GATA_NATPD	60.5	3e-09	Glutamyl-tRNA(Gln) amidotransferase subunit A OS=Natronomonas pharaonis (strain DSM 2160 / ATCC 35678) GN=gatA PE=3 SV=1	SPAC869.01	74.3	5e-14	COG0154	Asp-tRNAAsn/Glu-tRNAGln amidotransferase A subunit and related amidases	--	--	--	--	--	-	-	-
Unigene0000542	209	6	1.5577	0	0	gi|475620019|gb|EMT30964.1|	67.4	9e-11	Beta-ureidopropionase [Aegilops tauschii]	sp|Q9UBR1|BUP1_HUMAN	55.5	1e-07	Beta-ureidopropionase OS=Homo sapiens GN=UPB1 PE=1 SV=1	--	--	--	--	--	K01431	5e-11	65.9	ppp:PHYPADRAFT_213956	beta-ureidopropionase [EC:3.5.1.6]	-	-	-
Unigene0000543	544	19	1.8951	9	0.7928	gi|508721519|gb|EOY13416.1|	68.6	7e-11	Uncharacterized protein TCM_031987 [Theobroma cacao]	--	--	--	--	--	--	--	--	--	--	--	--	--	--	-	-	-
Unigene0000544	326	5	0.8322	7	1.029	--	--	--	--	--	--	--	--	--	--	--	--	--	--	--	--	--	--	-	-	-
Unigene0000545	262	4	0.8284	5	0.9145	--	--	--	--	--	--	--	--	--	--	--	--	--	--	--	--	--	--	-	-	-
Unigene0000546	203	0	0	0	0	gi|359490156|ref|XP_003634044.1|	68.6	4e-11	PREDICTED: receptor-like protein 12-like [Vitis vinifera]	--	--	--	--	--	--	--	--	--	--	--	--	--	--	-	-	-
Unigene0000547	293	9	1.6667	0	0	--	--	--	--	--	--	--	--	--	--	--	--	--	--	--	--	--	--	-	-	-
Unigene0000548	352	15	2.3122	2	0.2723	gi|508712712|gb|EOY04609.1|	93.6	1e-18	Actin-binding FH2 family protein isoform 1 [Theobroma cacao]	sp|O22824|FH2_ARATH	65.5	1e-10	Formin-like protein 2 OS=Arabidopsis thaliana GN=FH2 PE=3 SV=1	Rv3876	50.1	1e-06	COG0455	ATPases involved in chromosome partitioning	--	--	--	--	--	-	-	-
Unigene0000549	286	8	1.5178	4	0.6702	gi|5668803|gb|AAD46029.1|AC007519_14	143	1e-33	F16N3.14 [Arabidopsis thaliana]	sp|P0C7R1|PPR74_ARATH	143	3e-34	Pentatricopeptide repeat-containing protein At1g47580, chloroplastic OS=Arabidopsis thaliana GN=PCMP-H50 PE=2 SV=1	--	--	--	--	--	--	--	--	--	--	-	-	-
Unigene0000550	221	5	1.2276	1	0.2168	gi|514790871|ref|XP_004972184.1|	62	4e-09	PREDICTED: LOW QUALITY PROTEIN: pentatricopeptide repeat-containing protein At2g33760-like [Setaria italica]	sp|P0C7R1|PPR74_ARATH	60.8	3e-09	Pentatricopeptide repeat-containing protein At1g47580, chloroplastic OS=Arabidopsis thaliana GN=PCMP-H50 PE=2 SV=1	--	--	--	--	--	--	--	--	--	--	-	-	-
Unigene0000551	243	5	1.1165	3	0.5916	--	--	--	--	--	--	--	--	--	--	--	--	--	--	--	--	--	--	-	-	-
Unigene0000552	351	15	2.3188	6	0.8192	gi|357441701|ref|XP_003591128.1|	47.8	1e-11	PsbP-like protein [Medicago truncatula]	--	--	--	--	--	--	--	--	--	--	--	--	--	--	-	-	-
Unigene0000553	458	6	0.7108	1	0.1046	--	--	--	--	--	--	--	--	--	--	--	--	--	--	--	--	--	--	-	-	-
Unigene0000554	278	4	0.7807	1	0.1724	--	--	--	--	--	--	--	--	--	--	--	--	--	--	--	--	--	--	-	-	-
Unigene0000555	213	9	2.2927	3	0.6749	--	--	--	--	--	--	--	--	--	--	--	--	--	--	--	--	--	--	-	-	-
Unigene0000556	773	25	1.7549	8	0.4959	gi|470113208|ref|XP_004292817.1|	291	1e-77	PREDICTED: pentatricopeptide repeat-containing protein At2g04860-like [Fragaria vesca subsp. vesca]	sp|Q9SJ73|PP148_ARATH	269	2e-71	Pentatricopeptide repeat-containing protein At2g04860 OS=Arabidopsis thaliana GN=PCMP-E74 PE=2 SV=3	--	--	--	--	--	--	--	--	--	--	-	-	-
Unigene0000557	439	14	1.7304	10	1.0916	gi|297794721|ref|XP_002865245.1|	60.8	9e-09	predicted protein [Arabidopsis lyrata subsp. lyrata]	--	--	--	--	--	--	--	--	--	--	--	--	--	--	-	-	-
Unigene0000558	208	5	1.3043	2	0.4608	gi|371940440|dbj|BAL45642.1|	110	7e-24	heat shock protein 60 [Ulva pertusa]	sp|Q5B041|HSP60_EMENI	123	3e-28	Heat shock protein 60 OS=Emericella nidulans (strain FGSC A4 / ATCC 38163 / CBS 112.46 / NRRL 194 / M139) GN=hsp60 PE=1 SV=1	SPAC12G12.04	120	5e-28	COG0459	Chaperonin GroEL (HSP60 family)	K04077	2e-23	107	cre:CHLREDRAFT_115081	chaperonin GroEL	-	-	-
Unigene0000559	464	11	1.2863	7	0.7229	gi|224084862|ref|XP_002307427.1|	219	2e-56	AP2/ERF domain-containing transcription factor [Populus trichocarpa]	sp|Q9LPE8|ERF14_ARATH	159	7e-39	Ethylene-responsive transcription factor ERF014 OS=Arabidopsis thaliana GN=ERF014 PE=2 SV=1	--	--	--	--	--	--	--	--	--	--	-	-	-
Unigene0000560	301	9	1.6224	1	0.1592	gi|449476894|ref|XP_004154868.1|	56.6	2e-07	PREDICTED: zinc finger protein MAGPIE-like [Cucumis sativus]	--	--	--	--	--	--	--	--	--	--	--	--	--	--	-	-	-
Unigene0000561	239	3	0.6811	0	0	--	--	--	--	--	--	--	--	--	--	--	--	--	--	--	--	--	--	-	-	-
Unigene0000562	221	6	1.4731	2	0.4337	--	--	--	--	--	--	--	--	--	--	--	--	--	--	--	--	--	--	-	-	-
Unigene0000563	214	7	1.7749	5	1.1196	--	--	--	--	--	--	--	--	--	--	--	--	--	--	--	--	--	--	-	-	-
Unigene0000564	223	3	0.73	0	0	gi|356505182|ref|XP_003521371.1|	72	4e-12	PREDICTED: 60S ribosomal protein L4-1-like [Glycine max]	sp|P09180|RL4_DROME	101	2e-21	60S ribosomal protein L4 OS=Drosophila melanogaster GN=RpL4 PE=2 SV=2	SPBC1711.06	49.3	2e-06	COG0088	Ribosomal protein L4	K02930	6e-12	68.9	zma:100191314	large subunit ribosomal protein L4e	-	-	-
Unigene0000565	205	2	0.5294	0	0	gi|308812566|ref|XP_003083590.1|	108	4e-23	Ribosomal protein RPL1/RPL2/RL4L4 (ISS) [Ostreococcus tauri]	sp|P09180|RL4_DROME	113	4e-25	60S ribosomal protein L4 OS=Drosophila melanogaster GN=RpL4 PE=2 SV=2	SPBP8B7.03c	104	4e-23	COG0088	Ribosomal protein L4	K02930	2e-24	110	olu:OSTLU_13310	large subunit ribosomal protein L4e	-	-	-
Unigene0000566	220	3	0.7399	0	0	gi|159483259|ref|XP_001699678.1|	55.1	5e-07	proline-glycine-tyrosine rich protein [Chlamydomonas reinhardtii]	sp|P13238|VTU2_DROME	53.5	4e-07	Vitelline membrane protein Vm26Ab OS=Drosophila melanogaster GN=Vm26Ab PE=1 SV=2	--	--	--	--	--	--	--	--	--	--	-	-	-
Unigene0000567	538	14	1.412	2	0.1781	--	--	--	--	--	--	--	--	--	--	--	--	--	--	--	--	--	--	-	-	-
Unigene0000568	238	2	0.456	0	0	--	--	--	--	--	--	--	--	--	--	--	--	--	--	--	--	--	--	-	-	-
Unigene0000569	742	1	0.0731	2	0.1292	--	--	--	--	--	--	--	--	--	--	--	--	--	--	--	--	--	--	-	-	-
Unigene0000570	203	5	1.3365	1	0.2361	--	--	--	--	--	--	--	--	--	--	--	--	--	--	--	--	--	--	-	-	-
Unigene0000571	276	7	1.3762	4	0.6945	--	--	--	--	--	--	--	--	--	--	--	--	--	--	--	--	--	--	-	-	-
Unigene0000572	402	10	1.3498	0	0	--	--	--	--	--	--	--	--	--	--	--	--	--	--	--	--	--	--	-	-	-
Unigene0000573	275	9	1.7758	2	0.3485	gi|508783013|gb|EOY30269.1|	156	1e-37	Membrane lipoprotein [Theobroma cacao]	--	--	--	--	--	--	--	--	--	--	--	--	--	--	-	-	-
Unigene0000574	369	7	1.0293	0	0	--	--	--	--	--	--	--	--	--	--	--	--	--	--	--	--	--	--	-	-	-
Unigene0000575	272	4	0.7979	2	0.3524	--	--	--	--	--	--	--	--	--	--	--	--	--	--	--	--	--	--	-	-	-
Unigene0000576	345	9	1.4155	2	0.2778	gi|511348575|ref|YP_008081501.1|	229	2e-59	Ycf2 (chloroplast) [Trochodendron aralioides]	sp|Q09MB4|YCF2_CITSI	229	5e-60	Protein ycf2 OS=Citrus sinensis GN=ycf2-A PE=3 SV=1	--	--	--	--	--	--	--	--	--	--	-	-	-
Unigene0000577	233	4	0.9315	1	0.2057	gi|340806764|gb|AEK71416.1|	157	7e-38	hypothetical chloroplast RF2 [Schinus terebinthifolius]	sp|Q09MB4|YCF2_CITSI	157	2e-38	Protein ycf2 OS=Citrus sinensis GN=ycf2-A PE=3 SV=1	--	--	--	--	--	--	--	--	--	--	-	-	-
Unigene0000578	237	2	0.4579	2	0.4044	gi|225462663|ref|XP_002266509.1|	68.2	6e-11	PREDICTED: protein timeless homolog [Vitis vinifera]	--	--	--	--	--	--	--	--	--	K03155	1e-11	68.2	vvi:100246656	timeless	-	-	-
Unigene0000579	287	5	0.9453	1	0.167	gi|225464091|ref|XP_002269380.1|	147	5e-35	PREDICTED: root phototropism protein 3 [Vitis vinifera]	sp|Q9FMF5|RPT3_ARATH	136	5e-32	Root phototropism protein 3 OS=Arabidopsis thaliana GN=RPT3 PE=1 SV=2	--	--	--	--	--	--	--	--	--	--	-	-	-
Unigene0000580	268	4	0.8099	2	0.3576	gi|18394775|ref|NP_564095.1|	132	2e-30	NAD(P)-binding Rossmann-fold superfamily protein [Arabidopsis thaliana]	--	--	--	--	CC1055	70.1	9e-13	COG0451	Nucleoside-diphosphate-sugar epimerases	--	--	--	--	--	-	-	-
Unigene0000581	501	19	2.0578	5	0.4783	--	--	--	--	--	--	--	--	--	--	--	--	--	--	--	--	--	--	-	-	-
Unigene0000582	264	3	0.6166	2	0.363	--	--	--	--	--	--	--	--	--	--	--	--	--	--	--	--	--	--	-	-	-
Unigene0000583	536	19	1.9234	19	1.6987	--	--	--	--	--	--	--	--	--	--	--	--	--	--	--	--	--	--	-	-	-
Unigene0000584	315	9	1.5503	4	0.6085	--	--	--	--	--	--	--	--	--	--	--	--	--	--	--	--	--	--	-	-	-
Unigene0000585	232	5	1.1694	4	0.8262	--	--	--	--	--	--	--	--	--	--	--	--	--	--	--	--	--	--	-	-	-
Unigene0000586	480	30	3.3913	7	0.6988	--	--	--	--	--	--	--	--	--	--	--	--	--	--	--	--	--	--	-	-	-
Unigene0000587	274	10	1.9803	4	0.6996	--	--	--	--	--	--	--	--	--	--	--	--	--	--	--	--	--	--	-	-	-
Unigene0000588	716	40	3.0313	6	0.4016	gi|529156871|gb|AGS55458.1|	330	2e-89	cytochrome c oxidase subunit 1 (mitochondrion) [Achlya hypogyna]	sp|B0FWC7|COX1_AEDAE	344	4e-94	Cytochrome c oxidase subunit 1 OS=Aedes aegypti GN=mt:CoI PE=2 SV=2	RC0553	273	2e-73	COG0843	Heme/copper-type cytochrome/quinol oxidases, subunit 1	K02256	5e-88	323	sbi:SobioMp23	cytochrome c oxidase subunit I [EC:1.9.3.1]	-	-	-
Unigene0000589	202	3	0.8058	1	0.2372	--	--	--	--	--	--	--	--	--	--	--	--	--	--	--	--	--	--	-	-	-
Unigene0000590	585	26	2.4116	7	0.5734	--	--	--	--	--	--	--	--	--	--	--	--	--	--	--	--	--	--	-	-	-
Unigene0000591	263	6	1.2379	1	0.1822	--	--	--	--	--	--	--	--	--	--	--	--	--	--	--	--	--	--	-	-	-
Unigene0000592	212	5	1.2797	1	0.226	gi|356527947|ref|XP_003532567.1|	80.9	8e-15	PREDICTED: G-type lectin S-receptor-like serine/threonine-protein kinase At1g11410-like [Glycine max]	sp|Q9SXB8|Y1133_ARATH	75.1	1e-13	G-type lectin S-receptor-like serine/threonine-protein kinase At1g11330 OS=Arabidopsis thaliana GN=At1g11330 PE=1 SV=3	--	--	--	--	--	--	--	--	--	--	-	-	-
Unigene0000593	201	7	1.8897	1	0.2384	gi|359496527|ref|XP_003635257.1|	52.8	2e-06	PREDICTED: G-type lectin S-receptor-like serine/threonine-protein kinase At1g11330-like [Vitis vinifera]	--	--	--	--	--	--	--	--	--	--	--	--	--	--	-	-	-
Unigene0000594	203	3	0.8019	3	0.7082	--	--	--	--	--	--	--	--	--	--	--	--	--	--	--	--	--	--	-	-	-
Unigene0000595	308	8	1.4094	3	0.4668	--	--	--	--	--	--	--	--	--	--	--	--	--	--	--	--	--	--	-	-	-
Unigene0000596	202	6	1.6117	1	0.2372	gi|470105215|ref|XP_004288982.1|	90.9	8e-18	PREDICTED: ankyrin repeat-containing protein At3g12360-like [Fragaria vesca subsp. vesca]	--	--	--	--	--	--	--	--	--	--	--	--	--	--	-	-	-
Unigene0000597	392	10	1.3842	2	0.2445	gi|508783015|gb|EOY30271.1|	90.1	1e-17	Ankyrin repeat-containing-like protein [Theobroma cacao]	--	--	--	--	--	--	--	--	--	--	--	--	--	--	-	-	-
Unigene0000598	205	2	0.5294	1	0.2338	gi|357513591|ref|XP_003627084.1|	66.2	2e-10	Receptor-like protein kinase [Medicago truncatula]	sp|C0LGD9|Y1756_ARATH	64.7	2e-10	Probable LRR receptor-like serine/threonine-protein kinase At1g07560 OS=Arabidopsis thaliana GN=At1g07560 PE=2 SV=1	--	--	--	--	--	--	--	--	--	--	-	-	-
Unigene0000599	243	7	1.5631	2	0.3944	--	--	--	--	--	--	--	--	--	--	--	--	--	--	--	--	--	--	-	-	-
Unigene0000600	328	10	1.6543	3	0.4383	--	--	--	--	--	--	--	--	--	--	--	--	--	--	--	--	--	--	-	-	-
Unigene0000601	227	9	2.1513	5	1.0555	gi|357498183|ref|XP_003619380.1|	98.2	5e-20	Receptor-like protein kinase [Medicago truncatula]	sp|Q9SSL9|PEPR1_ARATH	59.3	8e-09	Leucine-rich repeat receptor-like protein kinase PEPR1 OS=Arabidopsis thaliana GN=PEPR1 PE=1 SV=1	--	--	--	--	--	--	--	--	--	--	-	-	-
Unigene0000602	223	3	0.73	4	0.8596	--	--	--	--	--	--	--	--	--	--	--	--	--	--	--	--	--	--	-	-	-
Unigene0000603	287	6	1.1344	1	0.167	gi|357485471|ref|XP_003613023.1|	43.1	1e-07	Translation initiation factor eIF-2B subunit beta [Medicago truncatula]	--	--	--	--	--	--	--	--	--	K03754	7e-08	41.6	vvi:100256712	translation initiation factor eIF-2B subunit beta	-	-	-
Unigene0000604	417	14	1.8217	4	0.4597	gi|115434250|ref|NP_001041883.1|	55.1	3e-11	Os01g0123000 [Oryza sativa Japonica Group]	--	--	--	--	--	--	--	--	--	--	--	--	--	--	-	-	-
Unigene0000605	215	5	1.2619	4	0.8916	--	--	--	--	--	--	--	--	--	--	--	--	--	--	--	--	--	--	-	-	-
Unigene0000606	889	16	0.9766	9	0.4851	gi|359488327|ref|XP_003633742.1|	61.6	2e-08	PREDICTED: LOW QUALITY PROTEIN: auxin transport protein BIG-like [Vitis vinifera]	--	--	--	--	--	--	--	--	--	--	--	--	--	--	-	-	-
Unigene0000607	239	7	1.5892	3	0.6015	--	--	--	--	--	--	--	--	--	--	--	--	--	--	--	--	--	--	-	-	-
Unigene0000608	206	6	1.5804	9	2.0936	--	--	--	--	--	--	--	--	--	--	--	--	--	--	--	--	--	--	-	-	-
Unigene0000609	279	7	1.3614	4	0.687	gi|154240639|dbj|BAF74636.1|	57.8	8e-08	hydroxyphenylpyruvate dioxygenase [Coptis japonica var. dissecta]	sp|O23920|HPPD_DAUCA	54.3	2e-07	4-hydroxyphenylpyruvate dioxygenase OS=Daucus carota PE=2 SV=1	--	--	--	--	--	K00457	9e-08	55.1	vvi:100248785	4-hydroxyphenylpyruvate dioxygenase [EC:1.13.11.27]	-	-	-
Unigene0000610	286	9	1.7075	2	0.3351	gi|449438230|ref|XP_004136892.1|	92.8	2e-18	PREDICTED: periaxin-like [Cucumis sativus]	sp|Q7A3J7|FNBA_STAAN	60.5	3e-09	Fibronectin-binding protein A OS=Staphylococcus aureus (strain N315) GN=fnbA PE=3 SV=1	XF0818	47.4	6e-06	COG2730	Endoglucanase	--	--	--	--	--	-	-	-
Unigene0000611	900	8	0.4823	3	0.1597	--	--	--	--	--	--	--	--	--	--	--	--	--	--	--	--	--	--	-	-	-
Unigene0000612	301	3	0.5408	2	0.3184	gi|470143224|ref|XP_004307281.1|	58.2	6e-08	PREDICTED: protein ECERIFERUM 1-like [Fragaria vesca subsp. vesca]	sp|F4IR05|CERL2_ARATH	56.6	5e-08	Protein CER1-like 2 OS=Arabidopsis thaliana GN=At2g37700 PE=2 SV=1	--	--	--	--	--	--	--	--	--	--	-	-	-
Unigene0000613	417	19	2.4723	6	0.6895	--	--	--	--	--	--	--	--	--	--	--	--	--	--	--	--	--	--	-	-	-
Unigene0000614	283	10	1.9173	0	0	--	--	--	--	--	--	--	--	--	--	--	--	--	--	--	--	--	--	-	-	-
Unigene0000615	204	9	2.3938	18	4.2283	gi|508704262|gb|EOX96158.1|	62	4e-09	Early nodulin-like protein 18 isoform 2 [Theobroma cacao]	--	--	--	--	--	--	--	--	--	--	--	--	--	--	-	-	-
Unigene0000616	452	19	2.2808	2	0.212	--	--	--	--	--	--	--	--	--	--	--	--	--	--	--	--	--	--	-	-	-
Unigene0000617	232	4	0.9355	5	1.0328	gi|508716442|gb|EOY08339.1|	124	5e-28	TTG1-like protein [Theobroma cacao]	sp|Q38960|LWD2_ARATH	80.5	3e-15	WD repeat-containing protein LWD2 OS=Arabidopsis thaliana GN=LWD2 PE=2 SV=1	--	--	--	--	--	K11805	2e-16	83.6	vvi:100241251	WD repeat-containing protein 68	-	-	-
Unigene0000618	344	12	1.8928	3	0.4179	gi|449483703|ref|XP_004156665.1|	92.4	3e-18	PREDICTED: probable LRR receptor-like serine/threonine-protein kinase At3g47570-like [Cucumis sativus]	sp|C0LGP4|Y3475_ARATH	67.4	3e-11	Probable LRR receptor-like serine/threonine-protein kinase At3g47570 OS=Arabidopsis thaliana GN=At3g47570 PE=1 SV=1	--	--	--	--	--	--	--	--	--	--	-	-	-
Unigene0000619	486	15	1.6747	3	0.2958	gi|346455971|gb|AEO31477.1|	316	1e-85	WRKY transcription factor 14-1 [Dimocarpus longan]	sp|O64747|WRK35_ARATH	220	4e-57	Probable WRKY transcription factor 35 OS=Arabidopsis thaliana GN=WRKY35 PE=2 SV=1	--	--	--	--	--	--	--	--	--	--	-	-	-
Unigene0000620	323	8	1.3439	1	0.1484	--	--	--	--	--	--	--	--	--	--	--	--	--	--	--	--	--	--	-	-	-
Unigene0000621	411	12	1.5842	4	0.4664	--	--	--	--	--	--	--	--	--	--	--	--	--	--	--	--	--	--	-	-	-
Unigene0000622	228	5	1.1899	1	0.2102	--	--	--	--	--	--	--	--	--	--	--	--	--	--	--	--	--	--	-	-	-
Unigene0000623	309	7	1.2292	2	0.3102	--	--	--	--	--	--	--	--	--	--	--	--	--	--	--	--	--	--	-	-	-
Unigene0000624	330	6	0.9865	10	1.4521	gi|225461130|ref|XP_002279972.1|	65.9	3e-10	PREDICTED: disease resistance protein At4g27190 [Vitis vinifera]	--	--	--	--	--	--	--	--	--	--	--	--	--	--	-	-	-
Unigene0000625	541	26	2.6077	5	0.4429	gi|508703578|gb|EOX95474.1|	61.2	1e-08	Phytochrome interacting factor 3, putative [Theobroma cacao]	--	--	--	--	--	--	--	--	--	--	--	--	--	--	-	-	-
Unigene0000626	229	2	0.4739	0	0	--	--	--	--	--	--	--	--	--	--	--	--	--	--	--	--	--	--	-	-	-
Unigene0000627	264	2	0.4111	2	0.363	--	--	--	--	--	--	--	--	--	--	--	--	--	--	--	--	--	--	-	-	-
Unigene0000628	238	7	1.5959	0	0	--	--	--	--	sp|P67805|GSTT1_DROSI	106	4e-23	Glutathione S-transferase 1-1 OS=Drosophila simulans GN=GstD1 PE=2 SV=2	--	--	--	--	--	--	--	--	--	--	-	-	-
Unigene0000629	205	7	1.8528	0	0	--	--	--	--	--	--	--	--	--	--	--	--	--	--	--	--	--	--	-	-	-
Unigene0000630	306	10	1.7732	0	0	--	--	--	--	--	--	--	--	--	--	--	--	--	--	--	--	--	--	-	-	-
Unigene0000631	354	8	1.2262	4	0.5415	gi|470111121|ref|XP_004291800.1|	189	2e-47	PREDICTED: ADP,ATP carrier protein, mitochondrial-like [Fragaria vesca subsp. vesca]	sp|P31691|ADT_ORYSJ	186	4e-47	ADP,ATP carrier protein, mitochondrial OS=Oryza sativa subsp. japonica GN=Os02g0718900 PE=2 SV=1	--	--	--	--	--	K05863	3e-47	186	osa:4330539	solute carrier family 25 (mitochondrial adenine nucleotide translocator), member 4/5/6/31	-	-	-
Unigene0000632	429	8	1.0118	3	0.3351	gi|514822423|ref|XP_004985876.1|	224	6e-58	PREDICTED: ADP,ATP carrier protein, mitochondrial-like [Setaria italica]	sp|P27080|ADT_CHLRE	223	2e-58	ADP,ATP carrier protein OS=Chlamydomonas reinhardtii GN=ABT PE=1 SV=1	--	--	--	--	--	K05863	1e-59	227	ppp:PHYPADRAFT_147904	solute carrier family 25 (mitochondrial adenine nucleotide translocator), member 4/5/6/31	-	-	-
Unigene0000633	222	7	1.7109	3	0.6476	--	--	--	--	--	--	--	--	--	--	--	--	--	--	--	--	--	--	-	-	-
Unigene0000634	425	11	1.4044	0	0	--	--	--	--	sp|Q64425|LIPP_MYOCO	112	8e-25	Pancreatic triacylglycerol lipase (Fragment) OS=Myocastor coypus GN=PNLIP PE=2 SV=1	--	--	--	--	--	--	--	--	--	--	-	-	-
Unigene0000635	278	5	0.9759	0	0	--	--	--	--	sp|Q5BKQ4|LIPR1_MOUSE	92.4	8e-19	Inactive pancreatic lipase-related protein 1 OS=Mus musculus GN=Pnliprp1 PE=2 SV=2	--	--	--	--	--	--	--	--	--	--	-	-	-
Unigene0000636	203	11	2.9402	4	0.9443	--	--	--	--	--	--	--	--	--	--	--	--	--	--	--	--	--	--	-	-	-
Unigene0000637	215	5	1.2619	4	0.8916	--	--	--	--	--	--	--	--	--	--	--	--	--	--	--	--	--	--	-	-	-
Unigene0000638	212	3	0.7678	0	0	gi|508723617|gb|EOY15514.1|	124	7e-28	Rhamnogalacturonate lyase family protein [Theobroma cacao]	--	--	--	--	--	--	--	--	--	--	--	--	--	--	-	GO:0005488//binding;GO:0003824//catalytic activity	GO:0016020//membrane
Unigene0000639	207	3	0.7864	0	0	--	--	--	--	--	--	--	--	--	--	--	--	--	--	--	--	--	--	-	-	-
Unigene0000640	202	6	1.6117	0	0	gi|33341543|gb|AAQ15192.1|AF365880_1	90.5	1e-17	resistance protein [Vitis vinifera]	sp|Q7XBQ9|RGA2_SOLBU	63.5	4e-10	Disease resistance protein RGA2 OS=Solanum bulbocastanum GN=RGA2 PE=1 SV=1	--	--	--	--	--	--	--	--	--	--	-	-	-
Unigene0000641	212	3	0.7678	0	0	gi|33341543|gb|AAQ15192.1|AF365880_1	96.3	2e-19	resistance protein [Vitis vinifera]	sp|Q7XBQ9|RGA2_SOLBU	73.9	3e-13	Disease resistance protein RGA2 OS=Solanum bulbocastanum GN=RGA2 PE=1 SV=1	--	--	--	--	--	--	--	--	--	--	GO:0006950//response to stress	GO:0016791//phosphatase activity;GO:0032559	-
Unigene0000642	633	18	1.5429	5	0.3785	gi|224111284|ref|XP_002332949.1|	97.1	5e-34	cc-nbs-lrr resistance protein [Populus trichocarpa]	--	--	--	--	--	--	--	--	--	--	--	--	--	--	-	GO:0016787//hydrolase activity;GO:0000166//nucleotide binding	-
Unigene0000643	235	5	1.1545	1	0.2039	gi|149786550|gb|ABR29794.1|	53.9	1e-06	CC-NBS-LRR protein [Solanum tuberosum]	--	--	--	--	--	--	--	--	--	--	--	--	--	--	-	-	-
Unigene0000644	219	5	1.2388	4	0.8753	--	--	--	--	--	--	--	--	--	--	--	--	--	--	--	--	--	--	-	-	-
Unigene0000645	232	4	0.9355	3	0.6197	gi|508780792|gb|EOY28048.1|	130	7e-30	Alpha/beta-Hydrolases superfamily protein [Theobroma cacao]	sp|O49523|DSEL_ARATH	116	5e-26	Phospholipase A1-IIgamma OS=Arabidopsis thaliana GN=DSEL PE=1 SV=1	sll0482	48.9	2e-06	COG3675	Predicted lipase	--	--	--	--	--	GO:0044238//primary metabolic process	GO:0016298//lipase activity	-
Unigene0000646	245	5	1.1074	0	0	gi|357463267|ref|XP_003601915.1|	126	1e-28	Glucan 1,3-beta-glucosidase [Medicago truncatula]	--	--	--	--	--	--	--	--	--	--	--	--	--	--	GO:0044238//primary metabolic process	GO:0016798//hydrolase activity, acting on glycosyl bonds;GO:0003779//actin binding;GO:0043167//ion binding	-
Unigene0000647	262	2	0.4142	0	0	--	--	--	--	--	--	--	--	--	--	--	--	--	--	--	--	--	--	-	-	-
Unigene0000648	549	15	1.4825	6	0.5237	--	--	--	--	--	--	--	--	--	--	--	--	--	--	--	--	--	--	-	-	-
Unigene0000649	214	3	0.7607	2	0.4479	gi|508782397|gb|EOY29653.1|	123	1e-27	Helicases,ATP-dependent helicases,nucleic acid binding,ATP binding,DNA-directed DNA polymerases,DNA binding [Theobroma cacao]	sp|O75417|DPOLQ_HUMAN	69.3	7e-12	DNA polymerase theta OS=Homo sapiens GN=POLQ PE=1 SV=2	BB0548_2	60.1	1e-09	COG0749	DNA polymerase I - 3'-5' exonuclease and polymerase domains	K02349	4e-26	115	rcu:RCOM_0803260	DNA polymerase theta subunit [EC:2.7.7.7]	GO:0006259//DNA metabolic process;GO:0060255;GO:0009639//response to red or far red light	GO:0003676//nucleic acid binding;GO:0042623//ATPase activity, coupled;GO:0034061;GO:0032559	GO:0043231//intracellular membrane-bounded organelle
Unigene0000650	204	2	0.532	0	0	--	--	--	--	--	--	--	--	--	--	--	--	--	--	--	--	--	--	-	-	-
Unigene0000651	402	5	0.6749	4	0.4768	gi|359496519|ref|XP_002263029.2|	120	3e-28	PREDICTED: G-type lectin S-receptor-like serine/threonine-protein kinase At1g11330-like [Vitis vinifera]	sp|Q9SXB4|Y1130_ARATH	92	8e-20	G-type lectin S-receptor-like serine/threonine-protein kinase At1g11300 OS=Arabidopsis thaliana GN=At1g11300 PE=2 SV=1	--	--	--	--	--	--	--	--	--	--	GO:0009987//cellular process	GO:0005488//binding;GO:0016772//transferase activity, transferring phosphorus-containing groups	-
Unigene0000652	215	3	0.7571	0	0	gi|359482729|ref|XP_002274489.2|	99	3e-20	PREDICTED: LOW QUALITY PROTEIN: midasin-like [Vitis vinifera]	--	--	--	--	--	--	--	--	--	K14572	7e-22	102	pop:POPTR_782171	midasin	GO:0010468//regulation of gene expression;GO:0009207;GO:0065003	GO:0017111//nucleoside-triphosphatase activity;GO:0005515//protein binding;GO:0032559	GO:0009526//plastid envelope
Unigene0000653	235	5	1.1545	1	0.2039	gi|460386911|ref|XP_004239137.1|	122	3e-27	PREDICTED: GDSL esterase/lipase At3g26430-like [Solanum lycopersicum]	sp|Q9LIN2|GDL53_ARATH	100	2e-21	GDSL esterase/lipase At3g26430 OS=Arabidopsis thaliana GN=At3g26430 PE=2 SV=1	--	--	--	--	--	--	--	--	--	--	GO:0044238//primary metabolic process	GO:0015928//fucosidase activity	GO:0005618//cell wall
Unigene0000654	231	5	1.1745	0	0	gi|508708764|gb|EOY00661.1|	111	4e-24	GDSL-like Lipase/Acylhydrolase superfamily protein [Theobroma cacao]	sp|Q7Y1X1|EST_HEVBR	96.3	6e-20	Esterase OS=Hevea brasiliensis PE=1 SV=1	--	--	--	--	--	--	--	--	--	--	GO:0044238//primary metabolic process	GO:0015928//fucosidase activity	GO:0005618//cell wall
Unigene0000655	244	5	1.1119	0	0	gi|225460157|ref|XP_002276248.1|	120	1e-26	PREDICTED: TMV resistance protein N-like [Vitis vinifera]	sp|Q40392|TMVRN_NICGU	100	3e-21	TMV resistance protein N OS=Nicotiana glutinosa GN=N PE=1 SV=1	--	--	--	--	--	--	--	--	--	--	GO:0006950//response to stress;GO:0050794//regulation of cellular process	GO:0032559	GO:0044464//cell part
Unigene0000656	238	4	0.9119	1	0.2013	--	--	--	--	--	--	--	--	--	--	--	--	--	--	--	--	--	--	-	-	-
Unigene0000657	218	3	0.7467	1	0.2198	--	--	--	--	--	--	--	--	--	--	--	--	--	--	--	--	--	--	-	-	-
Unigene0000658	424	10	1.2797	4	0.4521	--	--	--	--	--	--	--	--	--	--	--	--	--	--	--	--	--	--	-	-	-
Unigene0000659	270	4	0.8039	3	0.5325	--	--	--	--	--	--	--	--	--	--	--	--	--	--	--	--	--	--	-	-	-
Unigene0000660	267	3	0.6097	3	0.5384	--	--	--	--	--	--	--	--	--	--	--	--	--	--	--	--	--	--	-	-	-
Unigene0000661	257	5	1.0556	3	0.5594	gi|508704183|gb|EOX96079.1|	90.1	1e-17	Cytochrome P450 87A3 [Theobroma cacao]	sp|Q8L7D5|THAH_ARATH	89	9e-18	Cytochrome P450 708A2 OS=Arabidopsis thaliana GN=CYP708A2 PE=2 SV=3	--	--	--	--	--	--	--	--	--	--	GO:0010683;GO:0048513//organ development	GO:0004497//monooxygenase activity;GO:0005506//iron ion binding	GO:0043231//intracellular membrane-bounded organelle
Unigene0000662	447	10	1.2139	3	0.3216	--	--	--	--	--	--	--	--	--	--	--	--	--	--	--	--	--	--	-	-	-
Unigene0000663	313	7	1.2135	3	0.4593	--	--	--	--	--	--	--	--	--	--	--	--	--	--	--	--	--	--	-	-	-
Unigene0000664	320	9	1.5261	1	0.1498	gi|301121610|ref|XP_002908532.1|	186	2e-46	60S ribosomal protein L23 [Phytophthora infestans T30-4]	sp|Q9GNE2|RL23_AEDAE	199	5e-51	60S ribosomal protein L23 OS=Aedes aegypti GN=RpL23-A PE=2 SV=1	YER117w	174	3e-44	COG0093	Ribosomal protein L14	K02894	2e-48	190	ppp:PHYPADRAFT_197002	large subunit ribosomal protein L23e	GO:0034645//cellular macromolecule biosynthetic process	GO:0005198//structural molecule activity	GO:0015934//large ribosomal subunit
Unigene0000665	228	3	0.7139	0	0	--	--	--	--	--	--	--	--	--	--	--	--	--	--	--	--	--	--	-	-	-
Unigene0000666	251	5	1.0809	2	0.3818	--	--	--	--	--	--	--	--	--	--	--	--	--	--	--	--	--	--	-	-	-
Unigene0000667	245	6	1.3288	8	1.5648	gi|225463151|ref|XP_002266966.1|	153	1e-36	PREDICTED: anaphase-promoting complex subunit 8 [Vitis vinifera]	sp|Q9STS3|CDC23_ARATH	136	5e-32	Anaphase-promoting complex subunit 8 OS=Arabidopsis thaliana GN=APC8 PE=1 SV=1	--	--	--	--	--	K03355	3e-37	153	vvi:100249407	anaphase-promoting complex subunit 8	GO:0080134//regulation of response to stress;GO:0007088//regulation of mitosis	GO:0005488//binding	GO:0000152//nuclear ubiquitin ligase complex
Unigene0000668	240	11	2.4869	1	0.1997	--	--	--	--	--	--	--	--	--	--	--	--	--	--	--	--	--	--	-	-	-
Unigene0000669	227	4	0.9561	2	0.4222	--	--	--	--	--	--	--	--	--	--	--	--	--	--	--	--	--	--	-	-	-
Unigene0000670	210	3	0.7751	2	0.4564	--	--	--	--	--	--	--	--	--	--	--	--	--	--	--	--	--	--	-	-	-
Unigene0000671	202	5	1.3431	1	0.2372	--	--	--	--	--	--	--	--	--	--	--	--	--	--	--	--	--	--	-	-	-
Unigene0000672	281	5	0.9655	0	0	gi|301101339|ref|XP_002899758.1|	107	6e-23	creatine kinase, mitochondrial precursor [Phytophthora infestans T30-4]	sp|Q9U9J4|KARG_CARMA	194	1e-49	Arginine kinase OS=Carcinus maenas PE=2 SV=1	CAC3190	59.3	2e-09	COG3869	Arginine kinase	K00933	1e-48	191	zma:100273160	creatine kinase [EC:2.7.3.2]	GO:0006796//phosphate-containing compound metabolic process	GO:0016772//transferase activity, transferring phosphorus-containing groups;GO:0032559	-
Unigene0000673	600	26	2.3513	9	0.7188	gi|508708218|gb|EOY00115.1|	137	2e-31	Copper-binding periplasmic protein [Theobroma cacao]	--	--	--	--	--	--	--	--	--	--	--	--	--	--	-	-	-
Unigene0000674	286	5	0.9486	3	0.5027	--	--	--	--	--	--	--	--	--	--	--	--	--	--	--	--	--	--	-	-	-
Unigene0000675	225	4	0.9646	1	0.213	gi|470114883|ref|XP_004293637.1|	83.6	1e-15	PREDICTED: heavy metal-associated isoprenylated plant protein 26-like [Fragaria vesca subsp. vesca]	--	--	--	--	--	--	--	--	--	--	--	--	--	--	GO:0006812//cation transport	GO:0043169//cation binding	-
Unigene0000676	230	4	0.9437	3	0.6251	--	--	--	--	--	--	--	--	--	--	--	--	--	--	--	--	--	--	-	-	-
Unigene0000677	234	4	0.9275	2	0.4096	--	--	--	--	--	--	--	--	--	--	--	--	--	--	--	--	--	--	-	-	-
Unigene0000678	214	6	1.5213	2	0.4479	gi|356541123|ref|XP_003539032.1|	97.8	6e-20	PREDICTED: serine/threonine-protein kinase SMG1 [Glycine max]	--	--	--	--	--	--	--	--	--	K08873	1e-23	107	rcu:RCOM_0938990	PI-3-kinase-related kinase SMG-1	GO:0006796//phosphate-containing compound metabolic process;GO:0007165//signal transduction	GO:0004673//protein histidine kinase activity;GO:0032559	-
Unigene0000679	340	5	0.7979	0	0	gi|147767633|emb|CAN68990.1|	81.6	5e-15	hypothetical protein VITISV_015170 [Vitis vinifera]	--	--	--	--	--	--	--	--	--	--	--	--	--	--	-	GO:0005488//binding	-
Unigene0000680	244	4	0.8895	1	0.1964	--	--	--	--	--	--	--	--	--	--	--	--	--	--	--	--	--	--	-	-	-
Unigene0000681	220	5	1.2332	0	0	gi|470139497|ref|XP_004305484.1|	129	2e-29	PREDICTED: ethylene-responsive transcription factor ERF003-like [Fragaria vesca subsp. vesca]	sp|Q94AW5|ERF03_ARATH	129	8e-30	Ethylene-responsive transcription factor ERF003 OS=Arabidopsis thaliana GN=ERF003 PE=2 SV=1	--	--	--	--	--	--	--	--	--	--	GO:0000160//two-component signal transduction system (phosphorelay);GO:0010468//regulation of gene expression;GO:0032774;GO:0003006//developmental process involved in reproduction;GO:0006950//response to stress	GO:0003676//nucleic acid binding;GO:0001071//nucleic acid binding transcription factor activity	GO:0043231//intracellular membrane-bounded organelle
Unigene0000682	246	7	1.544	0	0	--	--	--	--	--	--	--	--	--	--	--	--	--	--	--	--	--	--	-	-	-
Unigene0000683	227	7	1.6732	2	0.4222	--	--	--	--	--	--	--	--	--	--	--	--	--	--	--	--	--	--	-	-	-
Unigene0000684	328	8	1.3234	2	0.2922	--	--	--	--	--	--	--	--	--	--	--	--	--	--	--	--	--	--	-	-	-
Unigene0000685	209	3	0.7789	2	0.4586	--	--	--	--	--	--	--	--	--	--	--	--	--	K00688	9e-06	48.5	zma:100285259	starch phosphorylase [EC:2.4.1.1]	-	-	-
Unigene0000686	295	7	1.2875	2	0.3249	gi|359473235|ref|XP_003631274.1|	158	3e-38	PREDICTED: pentatricopeptide repeat-containing protein At1g74600, chloroplastic-like [Vitis vinifera]	sp|Q9FG85|PP415_ARATH	110	4e-24	Pentatricopeptide repeat-containing protein At5g43790 OS=Arabidopsis thaliana GN=PCMP-E30 PE=2 SV=1	--	--	--	--	--	--	--	--	--	--	GO:0044238//primary metabolic process;GO:0045229//external encapsulating structure organization	GO:0004553//hydrolase activity, hydrolyzing O-glycosyl compounds	-
Unigene0000687	216	3	0.7536	0	0	gi|359473235|ref|XP_003631274.1|	107	1e-22	PREDICTED: pentatricopeptide repeat-containing protein At1g74600, chloroplastic-like [Vitis vinifera]	sp|Q9LZ19|PP364_ARATH	53.1	5e-07	Pentatricopeptide repeat-containing protein At5g04780 OS=Arabidopsis thaliana GN=PCMP-H16 PE=2 SV=2	--	--	--	--	--	--	--	--	--	--	GO:0044238//primary metabolic process;GO:0045229//external encapsulating structure organization	GO:0004553//hydrolase activity, hydrolyzing O-glycosyl compounds	-
Unigene0000688	241	4	0.9006	0	0	gi|225447374|ref|XP_002281003.1|	131	4e-30	PREDICTED: beta-amylase [Vitis vinifera]	sp|P93594|AMYB_WHEAT	121	2e-27	Beta-amylase OS=Triticum aestivum GN=BMY1 PE=2 SV=1	--	--	--	--	--	--	--	--	--	--	GO:0005976//polysaccharide metabolic process	GO:0043167//ion binding;GO:0016160//amylase activity	-
Unigene0000689	221	6	1.4731	1	0.2168	gi|359480461|ref|XP_002268207.2|	77.8	7e-14	PREDICTED: probable disease resistance protein At5g66900-like [Vitis vinifera]	sp|Q9FKZ0|DRL43_ARATH	67.8	2e-11	Probable disease resistance protein At5g66910 OS=Arabidopsis thaliana GN=At5g66910 PE=2 SV=1	--	--	--	--	--	--	--	--	--	--	-	GO:0032559	-
Unigene0000690	257	6	1.2668	0	0	--	--	--	--	--	--	--	--	--	--	--	--	--	--	--	--	--	--	-	-	-
Unigene0000691	207	3	0.7864	0	0	--	--	--	--	--	--	--	--	--	--	--	--	--	--	--	--	--	--	-	-	-
Unigene0000692	213	4	1.019	4	0.8999	--	--	--	--	--	--	--	--	--	--	--	--	--	--	--	--	--	--	-	-	-
Unigene0000693	357	7	1.0639	0	0	--	--	--	--	--	--	--	--	--	--	--	--	--	--	--	--	--	--	-	-	-
Unigene0000694	332	6	0.9806	1	0.1443	--	--	--	--	--	--	--	--	--	--	--	--	--	--	--	--	--	--	-	-	-
Unigene0000695	265	3	0.6143	3	0.5425	--	--	--	--	--	--	--	--	--	--	--	--	--	--	--	--	--	--	-	-	-
Unigene0000696	206	4	1.0536	2	0.4653	--	--	--	--	--	--	--	--	--	--	--	--	--	--	--	--	--	--	-	-	-
Unigene0000697	206	5	1.317	1	0.2326	gi|225458657|ref|XP_002282856.1|	86.7	2e-16	PREDICTED: subtilisin-like protease-like [Vitis vinifera]	--	--	--	--	--	--	--	--	--	--	--	--	--	--	GO:0019538//protein metabolic process;GO:0044092//negative regulation of molecular function	GO:0005515//protein binding;GO:0004175//endopeptidase activity	-
Unigene0000698	488	17	1.8902	11	1.0802	gi|508722352|gb|EOY14249.1|	290	7e-78	RNA-directed DNA polymerase [Theobroma cacao]	--	--	--	--	--	--	--	--	--	--	--	--	--	--	GO:0006396//RNA processing;GO:0006260//DNA replication	GO:0003676//nucleic acid binding;GO:0034061	-
Unigene0000699	360	9	1.3565	2	0.2662	gi|508719590|gb|EOY11487.1|	220	9e-57	Heat shock protein 70 (Hsp 70) family protein [Theobroma cacao]	sp|Q8H1B3|MD37B_ARATH	213	2e-55	Probable mediator of RNA polymerase II transcription subunit 37b OS=Arabidopsis thaliana GN=MED37B PE=1 SV=1	YER103w	179	1e-45	COG0443	Molecular chaperone	K09490	8e-55	211	pop:POPTR_711719	heat shock 70kDa protein 5	GO:0043161//proteasomal ubiquitin-dependent protein catabolic process;GO:0000741//karyogamy;GO:0006950//response to stress;GO:0000904//cell morphogenesis involved in differentiation	GO:0032559	GO:0044432//endoplasmic reticulum part;GO:0030312//external encapsulating structure;GO:0009536//plastid;GO:0031090//organelle membrane
Unigene0000700	203	3	0.8019	2	0.4721	--	--	--	--	--	--	--	--	--	--	--	--	--	--	--	--	--	--	-	-	-
Unigene0000701	423	17	2.1807	3	0.3399	--	--	--	--	--	--	--	--	--	--	--	--	--	--	--	--	--	--	-	-	-
Unigene0000702	236	6	1.3795	3	0.6092	--	--	--	--	--	--	--	--	--	--	--	--	--	--	--	--	--	--	-	-	-
Unigene0000703	201	5	1.3498	1	0.2384	--	--	--	--	--	--	--	--	--	--	--	--	--	--	--	--	--	--	-	-	-
Unigene0000704	239	3	0.6811	2	0.401	--	--	--	--	--	--	--	--	--	--	--	--	--	--	--	--	--	--	-	-	-
Unigene0000705	248	5	1.094	0	0	--	--	--	--	--	--	--	--	--	--	--	--	--	--	--	--	--	--	-	-	-
Unigene0000706	246	6	1.3234	2	0.3896	--	--	--	--	--	--	--	--	--	--	--	--	--	--	--	--	--	--	-	-	-
Unigene0000707	276	9	1.7694	0	0	gi|297800598|ref|XP_002868183.1|	83.6	1e-15	monooxygenase [Arabidopsis lyrata subsp. lyrata]	--	--	--	--	--	--	--	--	--	--	--	--	--	--	GO:0051707//response to other organism	-	GO:0043231//intracellular membrane-bounded organelle
Unigene0000708	202	3	0.8058	1	0.2372	--	--	--	--	--	--	--	--	--	--	--	--	--	--	--	--	--	--	-	-	-
Unigene0000709	361	6	0.9018	3	0.3982	--	--	--	--	--	--	--	--	--	--	--	--	--	--	--	--	--	--	-	-	-
Unigene0000710	355	7	1.0699	2	0.27	--	--	--	--	--	--	--	--	--	--	--	--	--	--	--	--	--	--	-	-	-
Unigene0000711	214	4	1.0142	0	0	--	--	--	--	sp|O60356|NUPR1_HUMAN	49.7	6e-06	Nuclear protein 1 OS=Homo sapiens GN=NUPR1 PE=1 SV=1	--	--	--	--	--	--	--	--	--	--	-	-	-
Unigene0000712	217	4	1.0002	2	0.4417	--	--	--	--	--	--	--	--	--	--	--	--	--	--	--	--	--	--	-	-	-
Unigene0000713	589	12	1.1055	0	0	gi|359479981|ref|XP_002273663.2|	230	1e-59	PREDICTED: cytochrome P450 734A6 [Vitis vinifera]	sp|Q9FF18|C7351_ARATH	160	5e-39	Cytokinin hydroxylase OS=Arabidopsis thaliana GN=CYP735A1 PE=1 SV=1	AGc2890	80.5	2e-15	COG2124	Cytochrome P450	--	--	--	--	--	-	GO:0016491//oxidoreductase activity;GO:0005506//iron ion binding	-
Unigene0000714	213	4	1.019	0	0	gi|449491110|ref|XP_004158803.1|	53.9	1e-06	PREDICTED: LOW QUALITY PROTEIN: uncharacterized LOC101220341 [Cucumis sativus]	--	--	--	--	--	--	--	--	--	--	--	--	--	--	-	-	-
Unigene0000715	233	8	1.863	4	0.8227	gi|470122967|ref|XP_004297508.1|	138	3e-32	PREDICTED: NAC transcription factor 29-like [Fragaria vesca subsp. vesca]	sp|Q8H4S4|NAC10_ORYSJ	88.6	1e-17	NAC transcription factor ONAC010 OS=Oryza sativa subsp. japonica GN=ONAC010 PE=2 SV=1	--	--	--	--	--	--	--	--	--	--	GO:0010468//regulation of gene expression;GO:0010087//phloem or xylem histogenesis	GO:0003676//nucleic acid binding	-
Unigene0000716	251	6	1.2971	3	0.5728	gi|508702425|gb|EOX94321.1|	125	2e-28	Vacuolar protein sorting-associated protein YPR157W [Theobroma cacao]	--	--	--	--	--	--	--	--	--	--	--	--	--	--	-	-	-
Unigene0000717	452	9	1.0804	3	0.3181	--	--	--	--	--	--	--	--	--	--	--	--	--	--	--	--	--	--	-	-	-
Unigene0000718	221	3	0.7366	1	0.2168	--	--	--	--	--	--	--	--	--	--	--	--	--	--	--	--	--	--	-	-	-
Unigene0000719	226	4	0.9604	4	0.8482	--	--	--	--	--	--	--	--	--	--	--	--	--	--	--	--	--	--	-	-	-
Unigene0000720	448	10	1.2112	5	0.5348	gi|87241454|gb|ABD33312.1|	160	1e-38	GCN5-related N-acetyltransferase; BRCT [Medicago truncatula]	--	--	--	--	--	--	--	--	--	--	--	--	--	--	GO:0006259//DNA metabolic process	GO:0005488//binding;GO:0016407//acetyltransferase activity	GO:0044464//cell part
Unigene0000721	213	2	0.5095	0	0	--	--	--	--	--	--	--	--	--	--	--	--	--	--	--	--	--	--	-	-	-
Unigene0000722	201	6	1.6197	1	0.2384	--	--	--	--	--	--	--	--	--	--	--	--	--	--	--	--	--	--	-	-	-
Unigene0000723	269	6	1.2103	1	0.1781	--	--	--	--	--	--	--	--	--	--	--	--	--	--	--	--	--	--	-	-	-
Unigene0000724	241	7	1.576	1	0.1988	gi|224096333|ref|XP_002310605.1|	77	1e-13	cytochrome P450 [Populus trichocarpa]	sp|P98188|C94A2_VICSA	55.1	1e-07	Cytochrome P450 94A2 OS=Vicia sativa GN=CYP94A2 PE=2 SV=1	--	--	--	--	--	--	--	--	--	--	-	GO:0046872//metal ion binding;GO:0016491//oxidoreductase activity	-
Unigene0000725	206	8	2.1072	6	1.3958	--	--	--	--	--	--	--	--	--	--	--	--	--	--	--	--	--	--	-	-	-
Unigene0000726	205	4	1.0587	1	0.2338	--	--	--	--	--	--	--	--	--	--	--	--	--	--	--	--	--	--	-	-	-
Unigene0000727	238	5	1.1399	0	0	gi|115452955|ref|NP_001050078.1|	100	1e-20	Os03g0343500 [Oryza sativa Japonica Group]	sp|Q90YU6|RL22_ICTPU	109	5e-24	60S ribosomal protein L22 OS=Ictalurus punctatus GN=rpl22 PE=2 SV=3	--	--	--	--	--	K02891	3e-21	100	zma:100192778	large subunit ribosomal protein L22e	GO:0034645//cellular macromolecule biosynthetic process	GO:0005198//structural molecule activity	GO:0015934//large ribosomal subunit;GO:0016020//membrane
Unigene0000728	229	3	0.7108	1	0.2093	gi|449501472|ref|XP_004161377.1|	80.9	8e-15	PREDICTED: uncharacterized LOC101220895 [Cucumis sativus]	--	--	--	--	--	--	--	--	--	--	--	--	--	--	-	GO:0004672//protein kinase activity	-
Unigene0000729	222	4	0.9777	3	0.6476	--	--	--	--	--	--	--	--	--	--	--	--	--	--	--	--	--	--	-	-	-
Unigene0000730	224	0	0	1	0.2139	--	--	--	--	--	--	--	--	--	--	--	--	--	--	--	--	--	--	-	-	-
Unigene0000731	307	6	1.0605	2	0.3122	--	--	--	--	--	--	--	--	--	--	--	--	--	--	--	--	--	--	-	-	-
Unigene0000732	202	4	1.0745	5	1.1862	--	--	--	--	--	--	--	--	--	--	--	--	--	--	--	--	--	--	-	-	-
Unigene0000733	230	5	1.1796	0	0	--	--	--	--	--	--	--	--	--	--	--	--	--	--	--	--	--	--	-	-	-
Unigene0000734	237	4	0.9158	2	0.4044	--	--	--	--	--	--	--	--	--	--	--	--	--	--	--	--	--	--	-	-	-
Unigene0000735	257	6	1.2668	0	0	gi|508785039|gb|EOY32295.1|	127	1e-28	ACD1-like [Theobroma cacao]	sp|Q8W496|PTC52_ARATH	96.3	5e-20	Protochlorophyllide-dependent translocon component 52, chloroplastic OS=Arabidopsis thaliana GN=PTC52 PE=2 SV=1	--	--	--	--	--	--	--	--	--	--	GO:0008152//metabolic process	GO:0016703;GO:0043169//cation binding;GO:0051536//iron-sulfur cluster binding	GO:0009536//plastid
Unigene0000736	308	9	1.5855	3	0.4668	--	--	--	--	--	--	--	--	--	--	--	--	--	--	--	--	--	--	-	-	-
Unigene0000737	204	5	1.3299	2	0.4698	--	--	--	--	--	--	--	--	--	--	--	--	--	--	--	--	--	--	-	-	-
Unigene0000738	218	4	0.9956	0	0	--	--	--	--	--	--	--	--	--	--	--	--	--	--	--	--	--	--	-	-	-
Unigene0000739	213	9	2.2927	1	0.225	gi|359474320|ref|XP_002270938.2|	64.7	6e-10	PREDICTED: pentatricopeptide repeat-containing protein At4g22760-like [Vitis vinifera]	sp|Q9SY02|PP301_ARATH	60.1	4e-09	Pentatricopeptide repeat-containing protein At4g02750 OS=Arabidopsis thaliana GN=PCMP-H24 PE=3 SV=1	--	--	--	--	--	--	--	--	--	--	-	-	-
Unigene0000740	255	7	1.4895	4	0.7517	gi|15222662|ref|NP_176613.1|	127	1e-28	pentatricopeptide repeat-containing protein [Arabidopsis thaliana]	sp|Q9STE1|PP333_ARATH	91.3	2e-18	Pentatricopeptide repeat-containing protein At4g21300 OS=Arabidopsis thaliana GN=PCMP-E36 PE=3 SV=1	--	--	--	--	--	--	--	--	--	--	-	-	-
Unigene0000741	338	13	2.0869	0	0	gi|38325811|gb|AAR17078.1|	176	2e-43	heat shock protein 70-1 [Nicotiana tabacum]	sp|O93866|HSP70_TRIRU	199	4e-51	Heat shock 70 kDa protein OS=Trichophyton rubrum GN=HSP70 PE=2 SV=1	SPAC13G7.02c	157	6e-39	COG0443	Molecular chaperone	K03283	2e-29	126	rcu:RCOM_1442270	heat shock 70kDa protein 1/8	GO:0050896//response to stimulus	GO:0032559	-
Unigene0000742	274	7	1.3862	2	0.3498	--	--	--	--	--	--	--	--	--	--	--	--	--	--	--	--	--	--	-	-	-
Unigene0000743	339	12	1.9207	2	0.2827	gi|460402797|ref|XP_004246897.1|	112	3e-24	PREDICTED: UPF0481 protein At3g47200-like [Solanum lycopersicum]	sp|Q9SD53|Y3720_ARATH	64.3	2e-10	UPF0481 protein At3g47200 OS=Arabidopsis thaliana GN=At3g47200 PE=1 SV=1	--	--	--	--	--	--	--	--	--	--	-	-	-
Unigene0000744	253	0	0	0	0	gi|470149251|ref|XP_004310153.1|	138	3e-32	PREDICTED: flavonol synthase/flavanone 3-hydroxylase-like [Fragaria vesca subsp. vesca]	sp|Q9C899|F6H2_ARATH	71.2	2e-12	Feruloyl CoA ortho-hydroxylase 2 OS=Arabidopsis thaliana GN=F6'H2 PE=1 SV=1	PA0147	48.9	2e-06	COG3491	Isopenicillin N synthase and related dioxygenases	--	--	--	--	--	GO:0008152//metabolic process	GO:0016705//oxidoreductase activity, acting on paired donors, with incorporation or reduction of molecular oxygen	-
Unigene0000745	215	4	1.0095	3	0.6687	--	--	--	--	--	--	--	--	--	--	--	--	--	--	--	--	--	--	-	-	-
Unigene0000746	215	4	1.0095	2	0.4458	--	--	--	--	--	--	--	--	--	--	--	--	--	--	--	--	--	--	-	-	-
Unigene0000747	263	5	1.0316	0	0	gi|2564066|dbj|BAA22940.1|	100	8e-21	LEDI-3 protein [Lithospermum erythrorhizon]	sp|P25349|YCP4_YEAST	90.5	3e-18	Flavoprotein-like protein YCP4 OS=Saccharomyces cerevisiae (strain ATCC 204508 / S288c) GN=YCP4 PE=1 SV=1	YCR004c	90.5	7e-19	COG0655	Multimeric flavodoxin WrbA	K03809	2e-20	97.1	vcn:VOLCADRAFT_108932	Trp repressor binding protein	GO:0008152//metabolic process	GO:0016491//oxidoreductase activity	GO:0043229//intracellular organelle;GO:0016020//membrane
Unigene0000748	300	8	1.4469	3	0.4792	--	--	--	--	--	--	--	--	--	--	--	--	--	--	--	--	--	--	-	-	-
Unigene0000749	423	12	1.5393	6	0.6797	gi|79514788|ref|NP_197171.2|	123	1e-27	origin recognition complex subunit 3 [Arabidopsis thaliana]	--	--	--	--	--	--	--	--	--	K02605	4e-33	139	pop:POPTR_894882	origin recognition complex subunit 3	-	-	GO:0043231//intracellular membrane-bounded organelle
Unigene0000750	540	22	2.2106	6	0.5325	gi|224121570|ref|XP_002330733.1|	46.6	2e-07	predicted protein [Populus trichocarpa]	--	--	--	--	--	--	--	--	--	K11755	4e-08	46.6	pop:POPTR_837290	phosphoribosyl-ATP pyrophosphohydrolase / phosphoribosyl-AMP cyclohydrolase [EC:3.6.1.31 3.5.4.19]	-	-	-
Unigene0000751	226	3	0.7203	5	1.0602	--	--	--	--	--	--	--	--	--	--	--	--	--	--	--	--	--	--	-	-	-
Unigene0000752	241	4	0.9006	1	0.1988	--	--	--	--	--	--	--	--	--	--	--	--	--	--	--	--	--	--	-	-	-
Unigene0000753	277	9	1.763	2	0.346	gi|460377464|ref|XP_004234513.1|	87.4	9e-17	PREDICTED: probable serine/threonine-protein kinase Cx32, chloroplastic-like [Solanum lycopersicum]	sp|P27450|CX32_ARATH	66.2	6e-11	Probable serine/threonine-protein kinase Cx32, chloroplastic OS=Arabidopsis thaliana GN=At4g35600 PE=1 SV=2	--	--	--	--	--	--	--	--	--	--	GO:0006464//protein modification process;GO:0006796//phosphate-containing compound metabolic process	GO:0004672//protein kinase activity;GO:0032559	GO:0016020//membrane
Unigene0000754	217	4	1.0002	1	0.2208	gi|356540872|ref|XP_003538908.1|	85.5	3e-16	PREDICTED: LOW QUALITY PROTEIN: probable serine/threonine-protein kinase Cx32, chloroplastic-like [Glycine max]	sp|P27450|CX32_ARATH	80.1	4e-15	Probable serine/threonine-protein kinase Cx32, chloroplastic OS=Arabidopsis thaliana GN=At4g35600 PE=1 SV=2	--	--	--	--	--	--	--	--	--	--	GO:0044237//cellular metabolic process	GO:0016301//kinase activity;GO:0000166//nucleotide binding	-
Unigene0000755	310	3	0.5251	1	0.1546	gi|508703762|gb|EOX95658.1|	129	4e-34	Transducin/WD40 repeat superfamily protein isoform 1 [Theobroma cacao]	sp|O60136|YNS5_SCHPO	75.9	8e-14	Uncharacterized WD repeat-containing protein C18H10.05 OS=Schizosaccharomyces pombe (strain 972 / ATCC 24843) GN=SPBC18H10.05 PE=4 SV=1	--	--	--	--	--	--	--	--	--	--	-	-	-
Unigene0000756	290	1	0.1871	0	0	--	--	--	--	--	--	--	--	--	--	--	--	--	--	--	--	--	--	-	-	-
Unigene0000757	225	4	0.9646	2	0.426	gi|449016797|dbj|BAM80199.1|	88.6	4e-17	60S ribosomal protein L19 [Cyanidioschyzon merolae strain 10D]	sp|P0CX83|RL19B_YEAST	95.5	1e-19	60S ribosomal protein L19-B OS=Saccharomyces cerevisiae (strain ATCC 204508 / S288c) GN=RPL19B PE=1 SV=1	YBR084c-a	95.5	2e-20	COG2147	Ribosomal protein L19E	K02885	4e-34	142	zma:100501852	large subunit ribosomal protein L19e	GO:0034645//cellular macromolecule biosynthetic process	GO:0005198//structural molecule activity	GO:0005840//ribosome;GO:0016020//membrane;GO:0044446//intracellular organelle part
Unigene0000758	207	5	1.3106	2	0.463	gi|45826061|gb|AAS77675.1|	55.8	3e-07	resistance protein [Quercus suber]	--	--	--	--	--	--	--	--	--	--	--	--	--	--	-	-	-
Unigene0000759	288	9	1.6956	4	0.6656	--	--	--	--	--	--	--	--	--	--	--	--	--	--	--	--	--	--	-	-	-
Unigene0000760	241	6	1.3509	3	0.5965	--	--	--	--	--	--	--	--	--	--	--	--	--	--	--	--	--	--	-	-	-
Unigene0000761	233	4	0.9315	5	1.0283	gi|359497392|ref|XP_002276304.2|	60.5	1e-08	PREDICTED: transcription factor bHLH25-like, partial [Vitis vinifera]	--	--	--	--	--	--	--	--	--	--	--	--	--	--	-	-	-
Unigene0000762	206	5	1.317	3	0.6979	gi|470103767|ref|XP_004288301.1|	58.9	3e-08	PREDICTED: transcription factor bHLH25-like [Fragaria vesca subsp. vesca]	--	--	--	--	--	--	--	--	--	--	--	--	--	--	-	-	-
Unigene0000763	378	11	1.579	1	0.1268	--	--	--	--	--	--	--	--	--	--	--	--	--	--	--	--	--	--	-	-	-
Unigene0000764	294	5	0.9228	1	0.163	--	--	--	--	--	--	--	--	--	--	--	--	--	--	--	--	--	--	-	-	-
Unigene0000765	221	7	1.7186	6	1.301	--	--	--	--	--	--	--	--	--	--	--	--	--	--	--	--	--	--	-	-	-
Unigene0000766	224	8	1.9379	4	0.8557	--	--	--	--	--	--	--	--	--	--	--	--	--	--	--	--	--	--	-	-	-
Unigene0000767	211	3	0.7715	2	0.4542	--	--	--	--	--	--	--	--	--	--	--	--	--	--	--	--	--	--	-	-	-
Unigene0000768	283	4	0.7669	0	0	gi|452819751|gb|EME26804.1|	146	2e-34	60S ribosomal protein L3 isoform 2 [Galdieria sulphuraria]	sp|P59671|RL3_NEUCR	172	6e-43	60S ribosomal protein L3 OS=Neurospora crassa (strain ATCC 24698 / 74-OR23-1A / CBS 708.71 / DSM 1257 / FGSC 987) GN=rpl-3 PE=3 SV=1	SPAPB8E5.06c	154	3e-38	COG0087	Ribosomal protein L3	K02925	5e-32	135	rcu:RCOM_0759150	large subunit ribosomal protein L3e	GO:0034645//cellular macromolecule biosynthetic process	GO:0005198//structural molecule activity	GO:0043231//intracellular membrane-bounded organelle;GO:0015934//large ribosomal subunit;GO:0016020//membrane;GO:0030312//external encapsulating structure
Unigene0000769	302	6	1.078	1	0.1587	--	--	--	--	--	--	--	--	--	--	--	--	--	--	--	--	--	--	-	-	-
Unigene0000770	257	6	1.2668	0	0	gi|105922499|gb|ABF81420.1|	60.8	1e-14	NBS type disease resistance protein [Populus trichocarpa]	--	--	--	--	--	--	--	--	--	--	--	--	--	--	-	GO:0016787//hydrolase activity	-
Unigene0000771	358	9	1.3641	7	0.937	--	--	--	--	--	--	--	--	--	--	--	--	--	--	--	--	--	--	-	-	-
Unigene0000772	201	5	1.3498	1	0.2384	--	--	--	--	--	--	--	--	--	--	--	--	--	--	--	--	--	--	-	-	-
Unigene0000773	231	3	0.7047	0	0	--	--	--	--	--	--	--	--	--	--	--	--	--	--	--	--	--	--	-	-	-
Unigene0000774	205	5	1.3234	0	0	gi|508783431|gb|EOY30687.1|	95.9	2e-19	Tetratricopeptide repeat-like superfamily protein [Theobroma cacao]	sp|Q9SY02|PP301_ARATH	67.8	2e-11	Pentatricopeptide repeat-containing protein At4g02750 OS=Arabidopsis thaliana GN=PCMP-H24 PE=3 SV=1	--	--	--	--	--	--	--	--	--	--	-	-	-
Unigene0000775	791	26	1.7835	4	0.2423	gi|356525661|ref|XP_003531442.1|	392	1e-108	PREDICTED: ADP,ATP carrier protein 1, mitochondrial-like [Glycine max]	sp|P02723|ADT_NEUCR	435	2e-121	ADP,ATP carrier protein OS=Neurospora crassa (strain ATCC 24698 / 74-OR23-1A / CBS 708.71 / DSM 1257 / FGSC 987) GN=acp PE=3 SV=1	--	--	--	--	--	K05863	3e-107	387	ppp:PHYPADRAFT_154659	solute carrier family 25 (mitochondrial adenine nucleotide translocator), member 4/5/6/31	-	-	-
Unigene0000776	215	3	0.7571	1	0.2229	--	--	--	--	--	--	--	--	--	--	--	--	--	--	--	--	--	--	-	-	-
Unigene0000777	213	4	1.019	0	0	--	--	--	--	--	--	--	--	--	--	--	--	--	--	--	--	--	--	-	-	-
Unigene0000778	204	4	1.0639	2	0.4698	--	--	--	--	--	--	--	--	--	--	--	--	--	--	--	--	--	--	-	-	-
Unigene0000779	209	5	1.2981	3	0.6879	--	--	--	--	--	--	--	--	--	--	--	--	--	--	--	--	--	--	-	-	-
Unigene0000780	379	12	1.718	5	0.6322	gi|225434137|ref|XP_002274786.1|	59.7	1e-12	PREDICTED: ion channel CASTOR-like [Vitis vinifera]	sp|Q5H8A6|CASTO_LOTJA	57	2e-11	Ion channel CASTOR OS=Lotus japonicus GN=CASTOR PE=1 SV=1	--	--	--	--	--	--	--	--	--	--	-	-	-
Unigene0000781	506	14	1.5013	4	0.3788	--	--	--	--	--	--	--	--	--	--	--	--	--	--	--	--	--	--	-	-	-
Unigene0000782	335	8	1.2958	1	0.143	gi|357468861|ref|XP_003604715.1|	109	2e-23	Receptor-like protein kinase [Medicago truncatula]	sp|C0LGF5|Y1341_ARATH	62	1e-09	Probable LRR receptor-like serine/threonine-protein kinase At1g34110 OS=Arabidopsis thaliana GN=At1g34110 PE=2 SV=2	--	--	--	--	--	--	--	--	--	--	-	-	-
Unigene0000783	476	17	1.9379	7	0.7047	--	--	--	--	--	--	--	--	--	--	--	--	--	--	--	--	--	--	-	-	-
Unigene0000784	318	15	2.5594	0	0	gi|193875680|gb|ACF24476.1|	182	2e-45	70 kDa heat shock protein [Goniomonas truncata]	sp|Q9U639|HSP7D_MANSE	213	2e-55	Heat shock 70 kDa protein cognate 4 OS=Manduca sexta PE=2 SV=1	SPAC13G7.02c	164	4e-41	COG0443	Molecular chaperone	K03283	8e-42	168	rcu:RCOM_1442280	heat shock 70kDa protein 1/8	GO:0008152//metabolic process;GO:0050896//response to stimulus	GO:0016628//oxidoreductase activity, acting on the CH-CH group of donors, NAD or NADP as acceptor;GO:0032559	-
Unigene0000785	210	4	1.0335	0	0	--	--	--	--	--	--	--	--	--	--	--	--	--	--	--	--	--	--	-	-	-
Unigene0000786	277	6	1.1753	4	0.692	--	--	--	--	--	--	--	--	--	--	--	--	--	--	--	--	--	--	-	-	-
Unigene0000787	236	4	0.9197	0	0	--	--	--	--	--	--	--	--	--	--	--	--	--	--	--	--	--	--	-	-	-
Unigene0000788	232	4	0.9355	5	1.0328	gi|460411288|ref|XP_004251045.1|	133	1e-30	PREDICTED: pentatricopeptide repeat-containing protein At2g27610-like [Solanum lycopersicum]	sp|Q9ZUW3|PP172_ARATH	129	5e-30	Pentatricopeptide repeat-containing protein At2g27610 OS=Arabidopsis thaliana GN=PCMP-H60 PE=2 SV=1	--	--	--	--	--	--	--	--	--	--	-	-	-
Unigene0000789	367	1	0.1478	0	0	gi|449513241|ref|XP_004164272.1|	112	6e-39	PREDICTED: solute carrier family 40 member 2-like [Cucumis sativus]	sp|O80905|S40A1_ARATH	105	1e-34	Solute carrier family 40 member 1 OS=Arabidopsis thaliana GN=IREG1 PE=3 SV=1	--	--	--	--	--	K14685	2e-37	108	rcu:RCOM_0850060	solute carrier family 40 (iron-regulated transporter), member 1	GO:0006826//iron ion transport	GO:0022890//inorganic cation transmembrane transporter activity	GO:0031224//intrinsic to membrane
Unigene0000790	380	21	2.9986	10	1.2611	gi|302594417|gb|ADL59398.1|	70.5	1e-11	EDNR2GH8 protein [Solanum x edinense]	sp|Q9M667|RPP13_ARATH	62.4	9e-10	Disease resistance protein RPP13 OS=Arabidopsis thaliana GN=RPP13 PE=2 SV=2	--	--	--	--	--	--	--	--	--	--	-	-	-
Unigene0000791	219	5	1.2388	7	1.5317	--	--	--	--	--	--	--	--	--	--	--	--	--	--	--	--	--	--	-	-	-
Unigene0000792	583	10	0.9307	1	0.0822	gi|15242391|ref|NP_197082.1|	117	1e-25	pollen Ole e 1 allergen and extensin family protein [Arabidopsis thaliana]	sp|Q9LK03|PERK2_ARATH	102	2e-21	Proline-rich receptor-like protein kinase PERK2 OS=Arabidopsis thaliana GN=PERK2 PE=2 SV=3	YPO2725	72	6e-13	COG3501	Uncharacterized protein conserved in bacteria	--	--	--	--	--	-	-	-
Unigene0000793	533	19	1.9342	0	0	gi|159463258|ref|XP_001689859.1|	236	1e-61	ribosomal protein L5, component of cytosolic 80S ribosome and 60S large subunit [Chlamydomonas reinhardtii]	sp|O76190|RL5_BOMMO	355	9e-98	60S ribosomal protein L5 OS=Bombyx mori GN=RpL5 PE=2 SV=1	YPL131w	227	1e-59	COG0256	Ribosomal protein L18	K02932	3e-62	236	cre:CHLREDRAFT_183782	large subunit ribosomal protein L5e	GO:0003002//regionalization;GO:0034645//cellular macromolecule biosynthetic process;GO:0009887//organ morphogenesis	GO:0019843//rRNA binding;GO:0005198//structural molecule activity	GO:0009536//plastid;GO:0015934//large ribosomal subunit;GO:0016020//membrane
Unigene0000794	279	4	0.7779	3	0.5153	gi|502138262|ref|XP_004503342.1|	126	2e-28	PREDICTED: MACPF domain-containing protein At1g14780-like [Cicer arietinum]	sp|Q8L612|MACP1_ARATH	94.4	2e-19	MACPF domain-containing protein At1g14780 OS=Arabidopsis thaliana GN=At1g14780 PE=2 SV=1	--	--	--	--	--	--	--	--	--	--	-	-	-
Unigene0000795	240	3	0.6783	0	0	--	--	--	--	--	--	--	--	--	--	--	--	--	--	--	--	--	--	-	-	-
Unigene0000796	225	4	0.9646	2	0.426	gi|15242811|ref|NP_195981.1|	85.1	4e-16	GDSL esterase/lipase [Arabidopsis thaliana]	sp|Q9LZS7|GDL71_ARATH	85.1	1e-16	GDSL esterase/lipase At5g03610 OS=Arabidopsis thaliana GN=At5g03610 PE=2 SV=1	--	--	--	--	--	--	--	--	--	--	-	GO:0016787//hydrolase activity	-
Unigene0000797	208	3	0.7826	1	0.2304	gi|470129094|ref|XP_004300463.1|	122	2e-27	PREDICTED: probable beta-D-xylosidase 2-like [Fragaria vesca subsp. vesca]	sp|Q94KD8|BXL2_ARATH	114	2e-25	Probable beta-D-xylosidase 2 OS=Arabidopsis thaliana GN=BXL2 PE=2 SV=1	--	--	--	--	--	K05349	2e-26	117	rcu:RCOM_1347430	beta-glucosidase [EC:3.2.1.21]	GO:0044238//primary metabolic process;GO:0003006//developmental process involved in reproduction	GO:0015926//glucosidase activity	GO:0005576//extracellular region;GO:0005618//cell wall
Unigene0000798	208	2	0.5217	4	0.9216	gi|470122115|ref|XP_004297095.1|	71.2	7e-12	PREDICTED: phosphate transporter PHO1 homolog 3-like [Fragaria vesca subsp. vesca]	sp|Q6R8G7|PHO13_ARATH	67.4	3e-11	Phosphate transporter PHO1 homolog 3 OS=Arabidopsis thaliana GN=PHO1;H3 PE=2 SV=2	--	--	--	--	--	--	--	--	--	--	-	-	GO:0031224//intrinsic to membrane
Unigene0000799	205	4	1.0587	6	1.4026	gi|508786888|gb|EOY34144.1|	54.3	8e-07	Tyrosine phosphatase-like member B isoform 1 [Theobroma cacao]	--	--	--	--	--	--	--	--	--	--	--	--	--	--	-	-	-
Unigene0000800	229	3	0.7108	0	0	--	--	--	--	--	--	--	--	--	--	--	--	--	--	--	--	--	--	-	-	-
Unigene0000801	413	17	2.2335	4	0.4641	gi|507106560|emb|CDF40181.1|	202	1e-51	40S ribosomal protein S15a [Chondrus crispus]	sp|Q6XIM8|RS15A_DROYA	240	2e-63	40S ribosomal protein S15a OS=Drosophila yakuba GN=RpS15Aa PE=2 SV=3	YJL190c	202	2e-52	COG0096	Ribosomal protein S8	K02957	1e-51	200	zma:100280584	small subunit ribosomal protein S15Ae	GO:0034645//cellular macromolecule biosynthetic process	GO:0005198//structural molecule activity	GO:0031090//organelle membrane;GO:0015935//small ribosomal subunit;GO:0030312//external encapsulating structure
Unigene0000802	240	3	0.6783	4	0.7987	gi|359482848|ref|XP_002280211.2|	53.5	1e-06	PREDICTED: nucleosome assembly protein 1-like 1-like isoform 1 [Vitis vinifera]	--	--	--	--	--	--	--	--	--	K11279	8e-07	52	zma:542113	nucleosome assembly protein 1-like 1	-	-	-
Unigene0000803	205	3	0.7941	1	0.2338	--	--	--	--	--	--	--	--	--	--	--	--	--	--	--	--	--	--	-	-	-
Unigene0000804	204	1	0.266	0	0	--	--	--	--	--	--	--	--	--	--	--	--	--	--	--	--	--	--	-	-	-
Unigene0000805	372	12	1.7503	3	0.3865	--	--	--	--	--	--	--	--	--	--	--	--	--	--	--	--	--	--	-	-	-
Unigene0000806	238	5	1.1399	1	0.2013	--	--	--	--	--	--	--	--	--	--	--	--	--	--	--	--	--	--	-	-	-
Unigene0000807	467	13	1.5105	4	0.4105	--	--	--	--	--	--	--	--	--	--	--	--	--	--	--	--	--	--	-	-	-
Unigene0000808	204	3	0.7979	0	0	--	--	--	--	--	--	--	--	--	--	--	--	--	--	--	--	--	--	-	-	-
Unigene0000809	260	5	1.0435	0	0	gi|224126317|ref|XP_002319809.1|	84.3	7e-16	2-oxoglutarate-dependent dioxygenase [Populus trichocarpa]	sp|Q9C6I4|G2OX7_ARATH	56.6	5e-08	Gibberellin 2-beta-dioxygenase 7 OS=Arabidopsis thaliana GN=GA2OX7 PE=1 SV=1	--	--	--	--	--	--	--	--	--	--	GO:0008152//metabolic process	GO:0016706//oxidoreductase activity, acting on paired donors, with incorporation or reduction of molecular oxygen, 2-oxoglutarate as one donor, and incorporation of one atom each of oxygen into both donors	-
Unigene0000810	264	3	0.6166	1	0.1815	--	--	--	--	--	--	--	--	--	--	--	--	--	--	--	--	--	--	-	-	-
Unigene0000811	202	7	1.8803	0	0	--	--	--	--	--	--	--	--	--	--	--	--	--	--	--	--	--	--	-	-	-
Unigene0000812	235	5	1.1545	0	0	gi|359478699|ref|XP_002285143.2|	85.9	3e-16	PREDICTED: receptor-like protein kinase THESEUS 1-like [Vitis vinifera]	--	--	--	--	--	--	--	--	--	--	--	--	--	--	GO:0006796//phosphate-containing compound metabolic process;GO:0006464//protein modification process	GO:0016301//kinase activity;GO:0032559	-
Unigene0000813	306	5	0.8866	0	0	--	--	--	--	--	--	--	--	--	--	--	--	--	--	--	--	--	--	-	-	-
Unigene0000814	207	7	1.8349	0	0	gi|460381320|ref|XP_004236399.1|	67.8	7e-11	PREDICTED: MMS19 nucleotide excision repair protein homolog [Solanum lycopersicum]	--	--	--	--	--	--	--	--	--	K15075	2e-15	80.5	rcu:RCOM_1489430	DNA repair/transcription protein MET18/MMS19	-	-	-
Unigene0000815	293	1	0.1852	1	0.1636	--	--	--	--	--	--	--	--	--	--	--	--	--	--	--	--	--	--	-	-	-
Unigene0000816	202	3	0.8058	0	0	--	--	--	--	--	--	--	--	--	--	--	--	--	--	--	--	--	--	-	-	-
Unigene0000817	224	3	0.7267	3	0.6418	gi|470110689|ref|XP_004291604.1|	126	1e-28	PREDICTED: TGACG-sequence-specific DNA-binding protein TGA-2.1-like [Fragaria vesca subsp. vesca]	sp|Q41558|HBP1C_WHEAT	89.4	7e-18	Transcription factor HBP-1b(c1) (Fragment) OS=Triticum aestivum PE=1 SV=2	--	--	--	--	--	K14431	9e-29	124	pop:POPTR_1085955	transcription factor TGA	GO:0010468//regulation of gene expression	GO:0003677//DNA binding;GO:0001071//nucleic acid binding transcription factor activity;GO:0005515//protein binding	-
Unigene0000818	533	13	1.3234	5	0.4495	--	--	--	--	--	--	--	--	--	--	--	--	--	--	--	--	--	--	-	-	-
Unigene0000819	204	6	1.5959	1	0.2349	--	--	--	--	--	--	--	--	--	--	--	--	--	--	--	--	--	--	-	-	-
Unigene0000820	658	19	1.5668	7	0.5098	--	--	--	--	--	--	--	--	--	--	--	--	--	--	--	--	--	--	-	-	-
Unigene0000821	290	5	0.9355	1	0.1652	--	--	--	--	--	--	--	--	--	--	--	--	--	--	--	--	--	--	-	-	-
Unigene0000822	229	3	0.7108	0	0	--	--	--	--	--	--	--	--	--	--	--	--	--	--	--	--	--	--	-	-	-
Unigene0000823	248	4	0.8752	2	0.3865	--	--	--	--	--	--	--	--	--	--	--	--	--	--	--	--	--	--	-	-	-
Unigene0000824	435	9	1.1226	2	0.2203	gi|4680208|gb|AAD27571.1|AF114171_12	66.2	2e-10	polyprotein [Sorghum bicolor]	--	--	--	--	--	--	--	--	--	--	--	--	--	--	-	-	-
Unigene0000825	414	11	1.4417	2	0.2315	--	--	--	--	--	--	--	--	--	--	--	--	--	--	--	--	--	--	-	-	-
Unigene0000826	209	5	1.2981	3	0.6879	--	--	--	--	--	--	--	--	--	--	--	--	--	--	--	--	--	--	-	-	-
Unigene0000827	233	3	0.6986	1	0.2057	--	--	--	--	--	--	--	--	--	--	--	--	--	--	--	--	--	--	-	-	-
Unigene0000828	206	3	0.7902	1	0.2326	gi|359492582|ref|XP_002282968.2|	110	7e-24	PREDICTED: chromosome-associated kinesin KIF4A-like [Vitis vinifera]	--	--	--	--	--	--	--	--	--	K10395	1e-24	110	vvi:100255840	kinesin family member 4/7/21/27	GO:0006928//cellular component movement;GO:0030198//extracellular matrix organization	GO:0003774//motor activity;GO:0032559	GO:0043234//protein complex;GO:0044424//intracellular part
Unigene0000829	345	7	1.1009	1	0.1389	gi|508776872|gb|EOY24128.1|	157	5e-38	Pleckstrin (PH) domain-containing protein isoform 4 [Theobroma cacao]	--	--	--	--	--	--	--	--	--	--	--	--	--	--	GO:0033036	GO:0008289//lipid binding	GO:0005911//cell-cell junction;GO:0043231//intracellular membrane-bounded organelle
Unigene0000830	235	6	1.3854	2	0.4078	gi|359495610|ref|XP_003635037.1|	139	3e-32	PREDICTED: BTB/POZ domain-containing protein At5g47800-like [Vitis vinifera]	sp|Q9FIK1|Y5780_ARATH	127	3e-29	BTB/POZ domain-containing protein At5g47800 OS=Arabidopsis thaliana GN=At5g47800 PE=2 SV=1	--	--	--	--	--	--	--	--	--	--	GO:0050794//regulation of cellular process;GO:0009314//response to radiation	GO:0060089	-
Unigene0000831	223	4	0.9733	3	0.6447	--	--	--	--	--	--	--	--	--	--	--	--	--	--	--	--	--	--	-	-	-
Unigene0000832	201	5	1.3498	3	0.7152	gi|482559361|gb|EOA23552.1|	52.4	3e-06	hypothetical protein CARUB_v10016746mg [Capsella rubella]	--	--	--	--	--	--	--	--	--	--	--	--	--	--	-	-	-
Unigene0000833	204	3	0.7979	0	0	--	--	--	--	--	--	--	--	--	--	--	--	--	--	--	--	--	--	-	-	-
Unigene0000834	263	3	0.6189	1	0.1822	--	--	--	--	--	--	--	--	--	--	--	--	--	--	--	--	--	--	-	-	-
Unigene0000835	306	5	0.8866	2	0.3132	gi|474077455|gb|EMS54598.1|	63.5	1e-09	Transposon Ty3-G Gag-Pol polyprotein [Triticum urartu]	--	--	--	--	--	--	--	--	--	--	--	--	--	--	GO:0006259//DNA metabolic process	GO:0046872//metal ion binding;GO:0003676//nucleic acid binding	-
Unigene0000836	249	5	1.0896	2	0.3849	--	--	--	--	--	--	--	--	--	--	--	--	--	--	--	--	--	--	-	-	-
Unigene0000837	216	3	0.7536	0	0	gi|449500027|ref|XP_004160983.1|	123	1e-27	PREDICTED: uncharacterized LOC101218717 [Cucumis sativus]	sp|Q6RT24|CENPE_MOUSE	66.6	5e-11	Centromere-associated protein E OS=Mus musculus GN=Cenpe PE=1 SV=1	YPL155c	58.9	2e-09	COG5059	Kinesin-like protein	--	--	--	--	--	GO:0006928//cellular component movement	GO:0003774//motor activity;GO:0032559	GO:0043234//protein complex
Unigene0000838	240	5	1.1304	0	0	--	--	--	--	--	--	--	--	--	--	--	--	--	--	--	--	--	--	-	-	-
Unigene0000839	253	6	1.2868	2	0.3788	gi|470132222|ref|XP_004301984.1|	134	6e-31	PREDICTED: pentatricopeptide repeat-containing protein At5g64320, mitochondrial-like [Fragaria vesca subsp. vesca]	sp|Q76C99|RF1_ORYSI	66.2	6e-11	Protein Rf1, mitochondrial OS=Oryza sativa subsp. indica GN=Rf1 PE=2 SV=1	--	--	--	--	--	--	--	--	--	--	-	-	GO:0043231//intracellular membrane-bounded organelle
Unigene0000840	272	6	1.1969	2	0.3524	--	--	--	--	--	--	--	--	--	--	--	--	--	--	--	--	--	--	-	-	-
Unigene0000841	212	2	0.5119	0	0	gi|449525486|ref|XP_004169748.1|	59.7	2e-08	PREDICTED: uncharacterized LOC101213605 [Cucumis sativus]	--	--	--	--	--	--	--	--	--	--	--	--	--	--	-	-	-
Unigene0000842	222	3	0.7332	1	0.2159	gi|502129671|ref|XP_004500389.1|	68.2	2e-11	PREDICTED: 26S protease regulatory subunit 6B homolog isoform X1 [Cicer arietinum]	sp|P85200|PRS6B_HELAN	68.2	4e-12	26S protease regulatory subunit 6B homolog OS=Helianthus annuus PE=1 SV=1	ECU10g0130	47	2e-06	COG1222	ATP-dependent 26S proteasome regulatory subunit	K03063	3e-12	68.2	pop:POPTR_734681	26S proteasome regulatory subunit T3	GO:0009057//macromolecule catabolic process;GO:0019538//protein metabolic process	GO:0016462//pyrophosphatase activity;GO:0032559	GO:0043234//protein complex;GO:0030312//external encapsulating structure;GO:0044424//intracellular part
Unigene0000843	264	6	1.2332	1	0.1815	gi|147783806|emb|CAN74695.1|	50.8	9e-06	hypothetical protein VITISV_024648 [Vitis vinifera]	--	--	--	--	--	--	--	--	--	--	--	--	--	--	-	-	-
Unigene0000844	372	12	1.7503	8	1.0306	gi|225443339|ref|XP_002264125.1|	124	9e-28	PREDICTED: KH domain-containing protein At4g18375 [Vitis vinifera]	--	--	--	--	--	--	--	--	--	K13162	3e-10	63.2	sbi:SORBI_02g028920	poly(rC)-binding protein 2/3/4	-	-	-
Unigene0000845	236	3	0.6897	2	0.4061	--	--	--	--	--	--	--	--	--	--	--	--	--	--	--	--	--	--	-	-	-
Unigene0000846	246	4	0.8823	0	0	--	--	--	--	--	--	--	--	--	--	--	--	--	--	--	--	--	--	-	-	-
Unigene0000847	239	8	1.8162	1	0.2005	--	--	--	--	--	--	--	--	--	--	--	--	--	--	--	--	--	--	-	-	-
Unigene0000848	269	5	1.0086	3	0.5344	gi|514749659|ref|XP_004961913.1|	182	2e-45	PREDICTED: auxin transporter-like protein 2-like isoform X1 [Setaria italica]	sp|Q688J2|LAX2_ORYSJ	180	2e-45	Auxin transporter-like protein 2 OS=Oryza sativa subsp. japonica GN=Os05g0447200 PE=2 SV=1	--	--	--	--	--	K13946	2e-46	183	rcu:RCOM_0592670	auxin influx carrier (AUX1 LAX family)	GO:0048856//anatomical structure development	-	GO:0031224//intrinsic to membrane
Unigene0000849	329	8	1.3194	5	0.7283	gi|470136515|ref|XP_004304036.1|	63.5	1e-09	PREDICTED: kynurenine formamidase-like [Fragaria vesca subsp. vesca]	--	--	--	--	--	--	--	--	--	--	--	--	--	--	GO:0006970//response to osmotic stress	-	GO:0030312//external encapsulating structure;GO:0031410//cytoplasmic vesicle
Unigene0000850	217	3	0.7501	1	0.2208	gi|357488203|ref|XP_003614389.1|	57.8	7e-08	RRNA intron-encoded homing endonuclease [Medicago truncatula]	--	--	--	--	--	--	--	--	--	--	--	--	--	--	-	-	-
Unigene0000851	203	0	0	0	0	--	--	--	--	--	--	--	--	--	--	--	--	--	--	--	--	--	--	-	-	-
Unigene0000852	203	2	0.5346	4	0.9443	--	--	--	--	--	--	--	--	--	--	--	--	--	--	--	--	--	--	-	-	-
Unigene0000853	508	9	0.9613	1	0.0943	gi|508707184|gb|EOX99080.1|	121	8e-27	Beta-hydroxyisobutyryl-CoA hydrolase 1 [Theobroma cacao]	sp|Q6NMB0|HIBC3_ARATH	89.7	9e-18	Probable 3-hydroxyisobutyryl-CoA hydrolase 3 OS=Arabidopsis thaliana GN=At2g30660 PE=2 SV=1	BMEI1196	63.2	2e-10	COG1024	Enoyl-CoA hydratase/carnithine racemase	K05605	2e-30	131	pop:POPTR_787000	3-hydroxyisobutyryl-CoA hydrolase [EC:3.1.2.4]	-	GO:0003824//catalytic activity	-
Unigene0000854	356	7	1.0669	2	0.2692	gi|508702886|gb|EOX94782.1|	101	4e-21	FZO-like [Theobroma cacao]	--	--	--	--	--	--	--	--	--	--	--	--	--	--	GO:0009987//cellular process	-	GO:0009536//plastid
Unigene0000855	223	6	1.4599	0	0	--	--	--	--	--	--	--	--	--	--	--	--	--	--	--	--	--	--	-	-	-
Unigene0000856	501	7	0.7581	2	0.1913	--	--	--	--	--	--	--	--	--	--	--	--	--	--	--	--	--	--	-	-	-
Unigene0000857	269	8	1.6137	2	0.3563	gi|356516148|ref|XP_003526758.1|	84	1e-15	PREDICTED: 60S acidic ribosomal protein P1-1-like [Glycine max]	sp|P50344|RLA1_DAVTA	105	1e-22	60S acidic ribosomal protein P1 OS=Davidiella tassiana GN=CLAH12 PE=1 SV=1	SPAC644.15	92	2e-19	COG2058	Ribosomal protein L12E/L44/L45/RPP1/RPP2	K02942	2e-16	84	rcu:RCOM_0969300	large subunit ribosomal protein LP1	GO:0034645//cellular macromolecule biosynthetic process	GO:0005198//structural molecule activity	GO:0005840//ribosome;GO:0043231//intracellular membrane-bounded organelle;GO:0016020//membrane
Unigene0000858	236	4	0.9197	0	0	--	--	--	--	--	--	--	--	--	--	--	--	--	--	--	--	--	--	-	-	-
Unigene0000859	313	5	0.8668	2	0.3062	--	--	--	--	--	--	--	--	--	--	--	--	--	--	--	--	--	--	-	-	-
Unigene0000860	222	4	0.9777	0	0	--	--	--	--	--	--	--	--	--	--	--	--	--	--	--	--	--	--	-	-	-
Unigene0000861	269	6	1.2103	2	0.3563	gi|508778024|gb|EOY25280.1|	130	9e-30	DNA-methyltransferase CMT2 [Theobroma cacao]	sp|Q94F87|CMT2_ARATH	110	4e-24	DNA (cytosine-5)-methyltransferase CMT2 OS=Arabidopsis thaliana GN=CMT2 PE=2 SV=3	--	--	--	--	--	K00558	4e-27	119	rcu:RCOM_0868250	DNA (cytosine-5-)-methyltransferase [EC:2.1.1.37]	GO:0032776//DNA methylation on cytosine	GO:0008757//S-adenosylmethionine-dependent methyltransferase activity;GO:0003676//nucleic acid binding	GO:0043231//intracellular membrane-bounded organelle
Unigene0000862	228	5	1.1899	0	0	--	--	--	--	--	--	--	--	--	--	--	--	--	--	--	--	--	--	-	-	-
Unigene0000863	216	3	0.7536	0	0	--	--	--	--	--	--	--	--	--	--	--	--	--	--	--	--	--	--	-	-	-
Unigene0000864	310	5	0.8752	3	0.4638	gi|456723011|gb|AGG38119.1|	120	7e-27	maternal effect embryo arrest 66 protein [Dimocarpus longan]	sp|Q3E6P4|FB95_ARATH	103	3e-22	F-box protein At2g02240 OS=Arabidopsis thaliana GN=At2g02240 PE=2 SV=1	--	--	--	--	--	--	--	--	--	--	-	-	-
Unigene0000865	249	4	0.8716	2	0.3849	gi|449479933|ref|XP_004155750.1|	50.8	9e-06	PREDICTED: uncharacterized LOC101211160 [Cucumis sativus]	--	--	--	--	--	--	--	--	--	--	--	--	--	--	-	-	-
Unigene0000866	215	5	1.2619	2	0.4458	gi|508786293|gb|EOY33549.1|	83.2	2e-15	Stress responsive A/B Barrel Domain [Theobroma cacao]	sp|Q9FK81|Y5258_ARATH	72	1e-12	Uncharacterized protein At5g22580 OS=Arabidopsis thaliana GN=At5g22580 PE=1 SV=1	--	--	--	--	--	--	--	--	--	--	-	-	GO:0009536//plastid
Unigene0000867	242	6	1.3453	1	0.198	--	--	--	--	--	--	--	--	--	--	--	--	--	--	--	--	--	--	-	-	-
Unigene0000868	268	6	1.2148	1	0.1788	--	--	--	--	--	--	--	--	--	--	--	--	--	--	--	--	--	--	-	-	-
Unigene0000869	1042	37	1.9267	7	0.3219	--	--	--	--	--	--	--	--	--	--	--	--	--	--	--	--	--	--	-	-	-
Unigene0000870	235	5	1.1545	0	0	--	--	--	--	--	--	--	--	--	--	--	--	--	--	--	--	--	--	-	-	-
Unigene0000871	229	4	0.9478	4	0.837	--	--	--	--	--	--	--	--	--	--	--	--	--	--	--	--	--	--	-	-	-
Unigene0000872	218	3	0.7467	6	1.3189	gi|346456296|gb|AEO31510.1|	44.3	2e-07	WRKY transcription factor 46 [Dimocarpus longan]	--	--	--	--	--	--	--	--	--	--	--	--	--	--	-	-	-
Unigene0000873	243	6	1.3398	6	1.1832	gi|240255277|ref|NP_187084.6|	95.9	2e-19	FtsH extracellular protease family protein [Arabidopsis thaliana]	--	--	--	--	--	--	--	--	--	--	--	--	--	--	GO:0019538//protein metabolic process	GO:0017111//nucleoside-triphosphatase activity;GO:0004175//endopeptidase activity;GO:0032559	-
Unigene0000874	333	8	1.3035	2	0.2878	gi|147779660|emb|CAN64955.1|	68.2	2e-21	hypothetical protein VITISV_029829 [Vitis vinifera]	--	--	--	--	--	--	--	--	--	--	--	--	--	--	-	-	-
Unigene0000875	201	4	1.0798	1	0.2384	gi|502146600|ref|XP_004506524.1|	67	1e-10	PREDICTED: sugar transport protein 11-like [Cicer arietinum]	--	--	--	--	--	--	--	--	--	--	--	--	--	--	GO:0006259//DNA metabolic process	GO:0046914//transition metal ion binding;GO:0003676//nucleic acid binding	-
Unigene0000876	212	4	1.0238	0	0	--	--	--	--	--	--	--	--	--	--	--	--	--	--	--	--	--	--	-	-	-
Unigene0000877	315	1	0.1723	0	0	--	--	--	--	--	--	--	--	--	--	--	--	--	--	--	--	--	--	-	-	-
Unigene0000878	283	4	0.7669	0	0	gi|348690101|gb|EGZ29915.1|	52	4e-06	serine protease trypsin-like protein [Phytophthora sojae]	sp|Q00871|CTRB1_LITVA	62.8	7e-10	Chymotrypsin BI OS=Litopenaeus vannamei PE=1 SV=1	--	--	--	--	--	--	--	--	--	--	-	GO:0003824//catalytic activity	-
Unigene0000879	217	2	0.5001	0	0	--	--	--	--	--	--	--	--	--	--	--	--	--	--	--	--	--	--	-	-	-
Unigene0000880	220	6	1.4798	2	0.4356	--	--	--	--	--	--	--	--	--	--	--	--	--	--	--	--	--	--	-	-	-
Unigene0000881	209	3	0.7789	1	0.2293	--	--	--	--	--	--	--	--	--	--	--	--	--	--	--	--	--	--	-	-	-
Unigene0000882	483	7	0.7864	2	0.1984	gi|284026888|gb|ADB66335.1|	112	1e-28	CC-NBS-LRR protein [Quercus suber]	--	--	--	--	--	--	--	--	--	--	--	--	--	--	-	-	-
Unigene0000883	283	2	0.3835	3	0.508	gi|508704683|gb|EOX96579.1|	90.9	8e-18	NB-ARC domain-containing disease resistance-like protein isoform 1 [Theobroma cacao]	sp|Q7XBQ9|RGA2_SOLBU	57.8	2e-08	Disease resistance protein RGA2 OS=Solanum bulbocastanum GN=RGA2 PE=1 SV=1	--	--	--	--	--	--	--	--	--	--	-	-	-
Unigene0000884	267	7	1.4226	2	0.359	--	--	--	--	--	--	--	--	--	--	--	--	--	--	--	--	--	--	-	-	-
Unigene0000885	419	15	1.9425	2	0.2287	gi|502126996|ref|XP_004499522.1|	45.8	2e-08	PREDICTED: enzymatic polyprotein-like [Cicer arietinum]	--	--	--	--	--	--	--	--	--	--	--	--	--	--	-	-	-
Unigene0000886	204	4	1.0639	3	0.7047	--	--	--	--	--	--	--	--	--	--	--	--	--	--	--	--	--	--	-	-	-
Unigene0000887	222	3	0.7332	0	0	--	--	--	--	sp|P23811|SCTR_RAT	77.4	3e-14	Secretin receptor OS=Rattus norvegicus GN=Sctr PE=2 SV=1	--	--	--	--	--	--	--	--	--	--	-	-	-
Unigene0000888	218	6	1.4934	0	0	gi|502171814|ref|XP_004515107.1|	122	2e-27	PREDICTED: S-type anion channel SLAH3-like [Cicer arietinum]	sp|Q9FLV9|SLAH3_ARATH	108	1e-23	S-type anion channel SLAH3 OS=Arabidopsis thaliana GN=SLAH3 PE=1 SV=1	--	--	--	--	--	--	--	--	--	--	GO:0006810//transport;GO:0050801//ion homeostasis	-	GO:0031224//intrinsic to membrane
Unigene0000889	358	9	1.3641	6	0.8031	--	--	--	--	--	--	--	--	--	--	--	--	--	--	--	--	--	--	-	-	-
Unigene0000890	255	5	1.0639	4	0.7517	--	--	--	--	--	--	--	--	--	--	--	--	--	--	--	--	--	--	-	-	-
Unigene0000891	399	2	0.272	0	0	gi|359481267|ref|XP_002264433.2|	53.5	1e-06	PREDICTED: MATE efflux family protein 2, chloroplastic [Vitis vinifera]	sp|Q84K71|MATE2_ARATH	52	1e-06	MATE efflux family protein 2, chloroplastic OS=Arabidopsis thaliana GN=DTX44 PE=2 SV=1	--	--	--	--	--	--	--	--	--	--	GO:0015893//drug transport	GO:0015291//secondary active transmembrane transporter activity	-
Unigene0000892	501	4	0.4332	0	0	gi|359481267|ref|XP_002264433.2|	53.5	2e-06	PREDICTED: MATE efflux family protein 2, chloroplastic [Vitis vinifera]	sp|Q84K71|MATE2_ARATH	52	2e-06	MATE efflux family protein 2, chloroplastic OS=Arabidopsis thaliana GN=DTX44 PE=2 SV=1	--	--	--	--	--	--	--	--	--	--	GO:0015893//drug transport	GO:0015291//secondary active transmembrane transporter activity	-
Unigene0000893	210	0	0	0	0	--	--	--	--	--	--	--	--	--	--	--	--	--	--	--	--	--	--	-	-	-
Unigene0000894	358	10	1.5156	3	0.4016	--	--	--	--	--	--	--	--	--	--	--	--	--	--	--	--	--	--	-	-	-
Unigene0000895	204	5	1.3299	2	0.4698	gi|351724223|ref|NP_001237818.1|	120	1e-26	mitotic cyclin b1-type [Glycine max]	sp|O48790|CCB14_ARATH	99	8e-21	Cyclin-B1-4 OS=Arabidopsis thaliana GN=CYCB1-4 PE=2 SV=1	--	--	--	--	--	K05868	2e-24	110	pop:POPTR_804416	cyclin B	GO:0051726//regulation of cell cycle	GO:0019900//kinase binding	GO:0043231//intracellular membrane-bounded organelle
Unigene0000896	215	5	1.2619	1	0.2229	gi|460365172|ref|XP_004228478.1|	132	2e-30	PREDICTED: G2/mitotic-specific cyclin-2-like [Solanum lycopersicum]	sp|O48790|CCB14_ARATH	127	2e-29	Cyclin-B1-4 OS=Arabidopsis thaliana GN=CYCB1-4 PE=2 SV=1	SPBC582.03	65.5	2e-11	COG5024	Cyclin	K05868	3e-31	132	rcu:RCOM_0785250	cyclin B	GO:0051726//regulation of cell cycle	GO:0019887//protein kinase regulator activity;GO:0019900//kinase binding	GO:0043231//intracellular membrane-bounded organelle
Unigene0000897	210	3	0.7751	0	0	--	--	--	--	--	--	--	--	--	--	--	--	--	--	--	--	--	--	-	-	-
Unigene0000898	548	13	1.2872	7	0.6121	--	--	--	--	--	--	--	--	--	--	--	--	--	--	--	--	--	--	-	-	-
Unigene0000899	258	5	1.0516	2	0.3715	--	--	--	--	--	--	--	--	--	--	--	--	--	--	--	--	--	--	-	-	-
Unigene0000900	211	4	1.0286	2	0.4542	--	--	--	--	--	--	--	--	--	--	--	--	--	--	--	--	--	--	-	-	-
Unigene0000901	275	7	1.3812	1	0.1743	gi|284026888|gb|ADB66335.1|	77.8	7e-14	CC-NBS-LRR protein [Quercus suber]	--	--	--	--	--	--	--	--	--	--	--	--	--	--	-	-	-
Unigene0000902	236	5	1.1496	2	0.4061	gi|508727855|gb|EOY19752.1|	92	4e-18	CC-NBS-LRR protein [Theobroma cacao]	--	--	--	--	--	--	--	--	--	--	--	--	--	--	-	-	-
Unigene0000903	240	5	1.1304	0	0	gi|428169437|gb|EKX38371.1|	90.5	1e-17	small subunit ribosomal protein S7e_1, cytoplasmic [Guillardia theta CCMP2712]	sp|Q962S0|RS7_SPOFR	159	4e-39	40S ribosomal protein S7 OS=Spodoptera frugiperda GN=RpS7 PE=2 SV=1	--	--	--	--	--	K02993	1e-17	87.8	cre:CHLREDRAFT_179706	small subunit ribosomal protein S7e	-	-	-
Unigene0000904	211	4	1.0286	2	0.4542	--	--	--	--	--	--	--	--	--	--	--	--	--	--	--	--	--	--	-	-	-
Unigene0000905	277	6	1.1753	3	0.519	gi|462399443|gb|EMJ05111.1|	88.6	4e-17	hypothetical protein PRUPE_ppa016794mg, partial [Prunus persica]	--	--	--	--	--	--	--	--	--	--	--	--	--	--	-	-	-
Unigene0000906	273	8	1.59	3	0.5266	--	--	--	--	--	--	--	--	--	--	--	--	--	--	--	--	--	--	-	-	-
Unigene0000907	452	11	1.3205	2	0.212	--	--	--	--	--	--	--	--	--	--	--	--	--	K03238	9e-06	48.9	vvi:100263785	translation initiation factor 2 subunit 2	-	-	-
Unigene0000908	215	6	1.5142	3	0.6687	--	--	--	--	--	--	--	--	--	--	--	--	--	--	--	--	--	--	-	-	-
Unigene0000909	216	3	0.7536	1	0.2219	--	--	--	--	--	--	--	--	--	--	--	--	--	--	--	--	--	--	-	-	-
Unigene0000910	244	3	0.6671	5	0.982	--	--	--	--	--	--	--	--	--	--	--	--	--	--	--	--	--	--	-	-	-
Unigene0000911	357	6	0.9119	1	0.1342	gi|301105188|ref|XP_002901678.1|	105	3e-22	60S ribosomal protein L32-1 [Phytophthora infestans T30-4]	sp|Q7RXY1|RL32_NEUCR	142	7e-34	60S ribosomal protein L32 OS=Neurospora crassa (strain ATCC 24698 / 74-OR23-1A / CBS 708.71 / DSM 1257 / FGSC 987) GN=rpl-32 PE=3 SV=1	SPBC16C6.11	113	9e-26	COG1717	Ribosomal protein L32E	K02912	1e-21	100	vvi:100241158	large subunit ribosomal protein L32e	GO:0034645//cellular macromolecule biosynthetic process	GO:0046914//transition metal ion binding;GO:0003824//catalytic activity;GO:0005198//structural molecule activity	GO:0030529//ribonucleoprotein complex
Unigene0000912	222	4	0.9777	2	0.4317	--	--	--	--	--	--	--	--	--	--	--	--	--	--	--	--	--	--	-	-	-
Unigene0000913	258	8	1.6825	0	0	gi|159487539|ref|XP_001701780.1|	145	4e-34	ribosomal protein L15, component of cytosolic 80S ribosome and 60S large subunit [Chlamydomonas reinhardtii]	sp|Q9XYC2|RL15_ORCLI	165	1e-40	60S ribosomal protein L15 OS=Orconectes limosus GN=RPL15 PE=2 SV=3	YMR121c	140	4e-34	COG1632	Ribosomal protein L15E	K02877	7e-35	145	cre:CHLREDRAFT_76376	large subunit ribosomal protein L15e	GO:0034645//cellular macromolecule biosynthetic process	GO:0005198//structural molecule activity	GO:0043231//intracellular membrane-bounded organelle;GO:0015934//large ribosomal subunit;GO:0016020//membrane
Unigene0000914	252	7	1.5072	2	0.3803	--	--	--	--	--	--	--	--	--	--	--	--	--	--	--	--	--	--	-	-	-
Unigene0000915	211	5	1.2858	0	0	gi|460388794|ref|XP_004240049.1|	114	7e-25	PREDICTED: DNA repair protein RAD51 homolog 3-like [Solanum lycopersicum]	sp|Q8GXF0|RA51C_ARATH	114	2e-25	DNA repair protein RAD51 homolog 3 OS=Arabidopsis thaliana GN=RAD51C PE=1 SV=2	APE0119	67.8	5e-12	COG0468	RecA/RadA recombinase	K10870	6e-26	115	rcu:RCOM_1611350	RAD51-like protein 2	GO:0007126//meiosis;GO:0000725//recombinational repair	GO:0043566//structure-specific DNA binding;GO:0042623//ATPase activity, coupled;GO:0032559	-
Unigene0000916	207	5	1.3106	0	0	gi|508704352|gb|EOX96248.1|	118	5e-26	RAS associated with diabetes protein 51C [Theobroma cacao]	sp|Q8GXF0|RA51C_ARATH	100	2e-21	DNA repair protein RAD51 homolog 3 OS=Arabidopsis thaliana GN=RAD51C PE=1 SV=2	--	--	--	--	--	K10870	5e-24	108	rcu:RCOM_1611350	RAD51-like protein 2	GO:0007126//meiosis;GO:0000725//recombinational repair	GO:0043566//structure-specific DNA binding;GO:0042623//ATPase activity, coupled;GO:0032559	-
Unigene0000917	278	5	0.9759	0	0	--	--	--	--	--	--	--	--	--	--	--	--	--	--	--	--	--	--	-	-	-
Unigene0000918	217	3	0.7501	3	0.6625	gi|4996369|dbj|BAA78427.1|	65.5	4e-10	polyprotein [Arabidopsis thaliana]	sp|P92512|M710_ARATH	50.4	3e-06	Uncharacterized mitochondrial protein AtMg00710 OS=Arabidopsis thaliana GN=AtMg00710 PE=4 SV=1	--	--	--	--	--	K01514	6e-13	72.4	vvi:100257957	exopolyphosphatase [EC:3.6.1.11]	GO:0006259//DNA metabolic process	GO:0046914//transition metal ion binding;GO:0003676//nucleic acid binding;GO:0016772//transferase activity, transferring phosphorus-containing groups	-
Unigene0000919	399	5	0.68	0	0	--	--	--	--	--	--	--	--	--	--	--	--	--	--	--	--	--	--	-	-	-
Unigene0000920	255	3	0.6384	0	0	gi|15242937|ref|NP_197661.1|	73.6	1e-12	TIR-NBS-LRR class disease resistance protein [Arabidopsis thaliana]	sp|Q9FH83|WRK52_ARATH	53.5	4e-07	Probable WRKY transcription factor 52 OS=Arabidopsis thaliana GN=WRKY52 PE=2 SV=3	--	--	--	--	--	--	--	--	--	--	GO:0006950//response to stress	GO:0000166//nucleotide binding	-
Unigene0000921	448	10	1.2112	2	0.2139	--	--	--	--	--	--	--	--	--	--	--	--	--	--	--	--	--	--	-	-	-
Unigene0000922	425	13	1.6597	5	0.5638	--	--	--	--	--	--	--	--	--	--	--	--	--	--	--	--	--	--	-	-	-
Unigene0000923	229	4	0.9478	0	0	--	--	--	--	--	--	--	--	--	--	--	--	--	--	--	--	--	--	-	-	-
Unigene0000924	307	8	1.4139	1	0.1561	gi|297724159|ref|NP_001174443.1|	64.3	8e-10	Os05g0434000 [Oryza sativa Japonica Group]	--	--	--	--	--	--	--	--	--	--	--	--	--	--	-	GO:0003676//nucleic acid binding	-
Unigene0000925	210	3	0.7751	0	0	--	--	--	--	--	--	--	--	--	--	--	--	--	--	--	--	--	--	-	-	-
Unigene0000926	240	4	0.9043	1	0.1997	gi|359482115|ref|XP_003632713.1|	130	1e-29	PREDICTED: pentatricopeptide repeat-containing protein At4g13650-like [Vitis vinifera]	sp|Q9SVP7|PP307_ARATH	97.4	2e-20	Pentatricopeptide repeat-containing protein At4g13650 OS=Arabidopsis thaliana GN=PCMP-H42 PE=2 SV=2	--	--	--	--	--	--	--	--	--	--	-	-	-
Unigene0000927	244	4	0.8895	2	0.3928	--	--	--	--	--	--	--	--	--	--	--	--	--	--	--	--	--	--	-	-	-
Unigene0000928	260	5	1.0435	1	0.1843	--	--	--	--	--	--	--	--	--	--	--	--	--	--	--	--	--	--	-	-	-
Unigene0000929	293	9	1.6667	2	0.3271	--	--	--	--	--	--	--	--	--	--	--	--	--	--	--	--	--	--	-	-	-
Unigene0000930	316	6	1.0303	2	0.3033	--	--	--	--	--	--	--	--	--	--	--	--	--	--	--	--	--	--	-	-	-
Unigene0000931	216	6	1.5072	3	0.6656	gi|226347409|gb|ACO50115.1|	95.5	3e-19	elongation factor 1 alpha, partial [Peranema trichophorum]	sp|A5DPE3|EF1A_PICGU	140	3e-33	Elongation factor 1-alpha OS=Meyerozyma guilliermondii (strain ATCC 6260 / CBS 566 / DSM 6381 / JCM 1539 / NBRC 10279 / NRRL Y-324) GN=TEF1 PE=3 SV=2	YPR080w	132	2e-31	COG5256	Translation elongation factor EF-1alpha (GTPase)	K03231	1e-16	84.7	pop:POPTR_675976	elongation factor 1-alpha	GO:0034645//cellular macromolecule biosynthetic process;GO:0009207	GO:0017111//nucleoside-triphosphatase activity;GO:0008135//translation factor activity, nucleic acid binding;GO:0032561//guanyl ribonucleotide binding	GO:0044424//intracellular part
Unigene0000932	249	2	0.4358	1	0.1925	--	--	--	--	--	--	--	--	--	--	--	--	--	--	--	--	--	--	-	-	-
Unigene0000933	299	7	1.2703	6	0.9616	gi|508724704|gb|EOY16601.1|	94.4	7e-19	Peroxidase superfamily protein isoform 2, partial [Theobroma cacao]	sp|O80822|PER25_ARATH	88.6	1e-17	Peroxidase 25 OS=Arabidopsis thaliana GN=PER25 PE=2 SV=2	--	--	--	--	--	K00430	7e-18	88.6	ath:AT2G41480	peroxidase [EC:1.11.1.7]	GO:0008152//metabolic process;GO:0006950//response to stress	GO:0005506//iron ion binding;GO:0003824//catalytic activity;GO:0016209//antioxidant activity	-
Unigene0000934	209	3	0.7789	0	0	gi|470107555|ref|XP_004290110.1|	114	5e-25	PREDICTED: UDP-glycosyltransferase 74F2-like [Fragaria vesca subsp. vesca]	sp|Q9SYK9|U74E2_ARATH	89.7	5e-18	UDP-glycosyltransferase 74E2 OS=Arabidopsis thaliana GN=UGT74E2 PE=1 SV=1	--	--	--	--	--	K13691	3e-21	100	pop:POPTR_807713	pathogen-inducible salicylic acid glucosyltransferase [EC:2.4.1.-]	-	GO:0016758//transferase activity, transferring hexosyl groups	-
Unigene0000935	564	27	2.5976	0	0	gi|255966042|gb|ACU45306.1|	103	3e-21	calmodulin [Rhodomonas sp. CCMP768]	sp|Q1HPS0|MLR_BOMMO	285	1e-76	Myosin regulatory light chain 2 OS=Bombyx mori PE=1 SV=1	SPAC3A12.14	90.9	1e-18	COG5126	Ca2+-binding protein (EF-Hand superfamily)	K02183	1e-20	99	ota:Ot01g03840	calmodulin	-	-	-
Unigene0000936	205	5	1.3234	0	0	--	--	--	--	sp|Q1HPS0|MLR_BOMMO	87.4	3e-17	Myosin regulatory light chain 2 OS=Bombyx mori PE=1 SV=1	--	--	--	--	--	--	--	--	--	--	-	-	-
Unigene0000937	216	4	1.0048	4	0.8874	--	--	--	--	--	--	--	--	--	--	--	--	--	--	--	--	--	--	-	-	-
Unigene0000938	439	19	2.3484	3	0.3275	--	--	--	--	--	--	--	--	--	--	--	--	--	--	--	--	--	--	-	-	-
Unigene0000939	215	6	1.5142	0	0	--	--	--	--	--	--	--	--	--	--	--	--	--	--	--	--	--	--	-	-	-
Unigene0000940	297	7	1.2789	2	0.3227	--	--	--	--	--	--	--	--	--	--	--	--	--	--	--	--	--	--	-	-	-
Unigene0000941	226	5	1.2004	2	0.4241	--	--	--	--	--	--	--	--	--	--	--	--	--	--	--	--	--	--	-	-	-
Unigene0000942	265	6	1.2285	4	0.7233	gi|357454621|ref|XP_003597591.1|	48.9	6e-08	Tir-nbs-lrr resistance protein [Medicago truncatula]	--	--	--	--	--	--	--	--	--	--	--	--	--	--	GO:0050896//response to stimulus	GO:0016787//hydrolase activity	-
Unigene0000943	204	3	0.7979	0	0	gi|195618460|gb|ACG31060.1|	90.1	1e-17	40S ribosomal protein S26 [Zea mays]	sp|P62856|RS26_RAT	131	2e-30	40S ribosomal protein S26 OS=Rattus norvegicus GN=Rps26 PE=3 SV=3	SPAC1805.11c	88.2	3e-18	COG4830	Ribosomal protein S26	K02976	3e-18	89.7	ppp:PHYPADRAFT_199563	small subunit ribosomal protein S26e	GO:0009987//cellular process	-	GO:0015935//small ribosomal subunit
Unigene0000944	275	7	1.3812	0	0	gi|197312897|gb|ACH63229.1|	137	6e-32	14-3-3 protein [Rheum australe]	sp|Q99002|1433_TRIHA	158	1e-38	14-3-3 protein homolog OS=Trichoderma harzianum PE=2 SV=1	SPAC8E11.02c	144	5e-35	COG5040	14-3-3 family protein	--	--	--	--	--	GO:0006974//response to DNA damage stimulus;GO:0032770//positive regulation of monooxygenase activity;GO:0043401//steroid hormone mediated signaling pathway;GO:0010038//response to metal ion;GO:0006952//defense response	GO:0004620//phospholipase activity;GO:0032559;GO:0019899//enzyme binding	GO:0016020//membrane;GO:0005618//cell wall;GO:0005576//extracellular region;GO:0009532//plastid stroma;GO:0031967
Unigene0000945	290	8	1.4968	3	0.4957	--	--	--	--	--	--	--	--	--	--	--	--	--	--	--	--	--	--	-	-	-
Unigene0000946	202	4	1.0745	0	0	--	--	--	--	--	--	--	--	--	--	--	--	--	--	--	--	--	--	-	-	-
Unigene0000947	235	4	0.9236	2	0.4078	gi|508708888|gb|EOY00785.1|	65.9	3e-10	Uncharacterized protein isoform 2 [Theobroma cacao]	--	--	--	--	--	--	--	--	--	--	--	--	--	--	-	-	-
Unigene0000948	294	4	0.7382	0	0	--	--	--	--	--	--	--	--	--	--	--	--	--	--	--	--	--	--	-	-	-
Unigene0000949	239	5	1.1352	1	0.2005	gi|115455427|ref|NP_001051314.1|	126	2e-28	Os03g0756000 [Oryza sativa Japonica Group]	sp|Q962U0|RL13A_SPOFR	154	2e-37	60S ribosomal protein L13a OS=Spodoptera frugiperda GN=RpL13A PE=2 SV=1	YNL069c	116	9e-27	COG0102	Ribosomal protein L13	K02872	3e-29	126	osa:4334154	large subunit ribosomal protein L13Ae	GO:0034645//cellular macromolecule biosynthetic process	GO:0005198//structural molecule activity	GO:0015934//large ribosomal subunit;GO:0009536//plastid
Unigene0000950	262	6	1.2426	2	0.3658	--	--	--	--	--	--	--	--	--	--	--	--	--	--	--	--	--	--	-	-	-
Unigene0000951	204	3	0.7979	1	0.2349	--	--	--	--	--	--	--	--	--	--	--	--	--	--	--	--	--	--	-	-	-
Unigene0000952	250	0	0	1	0.1917	--	--	--	--	--	--	--	--	--	--	--	--	--	--	--	--	--	--	-	-	-
Unigene0000953	301	6	1.0816	9	1.4329	--	--	--	--	--	--	--	--	--	--	--	--	--	--	--	--	--	--	-	-	-
Unigene0000954	332	6	0.9806	2	0.2887	--	--	--	--	--	--	--	--	--	--	--	--	--	--	--	--	--	--	-	-	-
Unigene0000955	249	6	1.3075	4	0.7698	--	--	--	--	--	--	--	--	--	--	--	--	--	--	--	--	--	--	-	-	-
Unigene0000956	257	8	1.689	0	0	--	--	--	--	--	--	--	--	--	--	--	--	--	--	--	--	--	--	-	-	-
Unigene0000957	208	5	1.3043	3	0.6912	--	--	--	--	--	--	--	--	--	--	--	--	--	--	--	--	--	--	-	-	-
Unigene0000958	231	6	1.4094	3	0.6223	--	--	--	--	--	--	--	--	--	--	--	--	--	--	--	--	--	--	-	-	-
Unigene0000959	222	6	1.4665	2	0.4317	gi|359492423|ref|XP_002284303.2|	127	6e-29	PREDICTED: uncharacterized rhomboid protein AN10929-like [Vitis vinifera]	--	--	--	--	--	--	--	--	--	--	--	--	--	--	GO:0019538//protein metabolic process	GO:0004175//endopeptidase activity	GO:0031224//intrinsic to membrane
Unigene0000960	202	5	1.3431	1	0.2372	gi|475544067|gb|EMT10257.1|	117	6e-26	ATP-citrate synthase [Aegilops tauschii]	sp|Q2QZ86|ACLA2_ORYSJ	117	3e-26	ATP-citrate synthase alpha chain protein 2 OS=Oryza sativa subsp. japonica GN=ACLA-2 PE=2 SV=2	--	--	--	--	--	K01648	2e-26	117	rcu:RCOM_1436330	ATP citrate (pro-S)-lyase [EC:2.3.3.8]	-	GO:0004774//succinate-CoA ligase activity;GO:0032559	-
Unigene0000961	387	7	0.9815	3	0.3715	--	--	--	--	--	--	--	--	--	--	--	--	--	--	--	--	--	--	-	-	-
Unigene0000962	216	3	0.7536	3	0.6656	--	--	--	--	--	--	--	--	--	--	--	--	--	--	--	--	--	--	-	-	-
Unigene0000963	311	5	0.8724	4	0.6163	gi|508719414|gb|EOY11311.1|	143	1e-33	Recovery protein 3 isoform 3 [Theobroma cacao]	--	--	--	--	--	--	--	--	--	K02350	6e-36	148	vvi:100263126	DNA polymerase zeta subunit [EC:2.7.7.7]	-	-	-
Unigene0000964	241	4	0.9006	1	0.1988	--	--	--	--	--	--	--	--	--	--	--	--	--	--	--	--	--	--	-	-	-
Unigene0000965	224	4	0.9689	5	1.0697	--	--	--	--	--	--	--	--	--	--	--	--	--	--	--	--	--	--	-	-	-
Unigene0000966	222	5	1.2221	0	0	--	--	--	--	--	--	--	--	--	--	--	--	--	--	--	--	--	--	-	-	-
Unigene0000967	373	8	1.1638	0	0	--	--	--	--	--	--	--	--	--	--	--	--	--	--	--	--	--	--	-	-	-
Unigene0000968	216	3	0.7536	2	0.4437	gi|359495024|ref|XP_002267933.2|	51.6	5e-06	PREDICTED: putative disease resistance protein At3g14460-like [Vitis vinifera]	--	--	--	--	--	--	--	--	--	--	--	--	--	--	-	-	-
Unigene0000969	205	4	1.0587	1	0.2338	--	--	--	--	--	--	--	--	--	--	--	--	--	--	--	--	--	--	-	-	-
Unigene0000970	212	4	1.0238	0	0	gi|508778291|gb|EOY25547.1|	102	3e-21	Leucine-rich receptor-like protein kinase family protein [Theobroma cacao]	sp|C0LGQ9|Y4294_ARATH	63.5	4e-10	Probable LRR receptor-like serine/threonine-protein kinase At4g20940 OS=Arabidopsis thaliana GN=At4g20940 PE=1 SV=1	--	--	--	--	--	--	--	--	--	--	GO:0044238//primary metabolic process;GO:0034641//cellular nitrogen compound metabolic process;GO:0044281//small molecule metabolic process	GO:0016772//transferase activity, transferring phosphorus-containing groups;GO:0016616//oxidoreductase activity, acting on the CH-OH group of donors, NAD or NADP as acceptor;GO:0000166//nucleotide binding	GO:0016020//membrane
Unigene0000971	246	6	1.3234	2	0.3896	--	--	--	--	--	--	--	--	--	--	--	--	--	--	--	--	--	--	-	-	-
Unigene0000972	290	7	1.3097	0	0	gi|384247700|gb|EIE21186.1|	156	1e-37	ribosomal protein S1 [Coccomyxa subellipsoidea C-169]	sp|P23403|RS20_XENLA	166	3e-41	40S ribosomal protein S20 OS=Xenopus laevis GN=rps20 PE=1 SV=1	SPCC576.09	153	6e-38	COG0051	Ribosomal protein S10	K02969	2e-38	157	ppp:PHYPADRAFT_148072	small subunit ribosomal protein S20e	GO:0034645//cellular macromolecule biosynthetic process	GO:0003676//nucleic acid binding;GO:0005198//structural molecule activity	GO:0005911//cell-cell junction;GO:0015935//small ribosomal subunit;GO:0030312//external encapsulating structure
Unigene0000973	249	5	1.0896	0	0	gi|115471261|ref|NP_001059229.1|	104	7e-22	Os07g0229900 [Oryza sativa Japonica Group]	sp|P80455|RS12_DROME	123	4e-28	40S ribosomal protein S12 OS=Drosophila melanogaster GN=RpS12 PE=2 SV=2	SPBC1685.02c	88.6	3e-18	COG1358	Ribosomal protein HS6-type (S12/L30/L7a)	K02951	9e-24	108	ppp:PHYPADRAFT_142612	small subunit ribosomal protein S12e	GO:0034645//cellular macromolecule biosynthetic process;GO:0006970//response to osmotic stress;GO:0010038//response to metal ion	GO:0005198//structural molecule activity	GO:0043231//intracellular membrane-bounded organelle;GO:0015935//small ribosomal subunit
Unigene0000974	490	12	1.3288	9	0.8802	gi|508773493|gb|EOY20749.1|	229	2e-59	UDP-N-acetylglucosamine--N-acetylmuramyl- pyrophosphoryl-undecaprenol N-acetylglucosamine transferase isoform 3 [Theobroma cacao]	--	--	--	--	--	--	--	--	--	--	--	--	--	--	-	-	-
Unigene0000975	215	4	1.0095	2	0.4458	--	--	--	--	--	--	--	--	--	--	--	--	--	--	--	--	--	--	-	-	-
Unigene0000976	228	4	0.9519	1	0.2102	gi|225425850|ref|XP_002265789.1|	80.9	8e-15	PREDICTED: DNA polymerase alpha subunit B [Vitis vinifera]	--	--	--	--	--	--	--	--	--	K02321	8e-20	95.1	rcu:RCOM_1081910	DNA polymerase alpha subunit B	-	-	-
Unigene0000977	203	2	0.5346	2	0.4721	gi|508779348|gb|EOY26604.1|	119	2e-26	Pleiotropic drug resistance 12 [Theobroma cacao]	sp|Q0JLC5|PDR3_ORYSJ	116	5e-26	Pleiotropic drug resistance protein 3 OS=Oryza sativa subsp. japonica GN=PDR3 PE=2 SV=1	YDR406w_1	55.8	2e-08	COG1131	ABC-type multidrug transport system, ATPase component	--	--	--	--	--	GO:0009207;GO:0042221//response to chemical stimulus;GO:0046865//terpenoid transport;GO:0030001//metal ion transport	GO:0017111//nucleoside-triphosphatase activity;GO:0015604//organic phosphonate transmembrane transporter activity;GO:0032559	GO:0016020//membrane
Unigene0000978	285	5	0.9519	6	1.0089	--	--	--	--	--	--	--	--	--	--	--	--	--	--	--	--	--	--	-	-	-
Unigene0000979	252	4	0.8613	1	0.1902	gi|525507304|ref|NP_001267692.1|	37.4	1e-06	RNA-dependent RNA polymerase 1-like [Cucumis sativus]	--	--	--	--	--	--	--	--	--	--	--	--	--	--	-	-	-
Unigene0000980	282	5	0.9621	0	0	--	--	--	--	--	--	--	--	--	--	--	--	--	--	--	--	--	--	-	-	-
Unigene0000981	502	17	1.8375	9	0.8591	--	--	--	--	--	--	--	--	--	--	--	--	--	--	--	--	--	--	-	-	-
Unigene0000982	362	9	1.349	6	0.7943	--	--	--	--	--	--	--	--	--	--	--	--	--	--	--	--	--	--	-	-	-
Unigene0000983	241	5	1.1257	2	0.3977	gi|359481253|ref|XP_002266325.2|	107	1e-22	PREDICTED: PAN domain-containing protein At5g03700-like [Vitis vinifera]	--	--	--	--	--	--	--	--	--	--	--	--	--	--	-	GO:0030246//carbohydrate binding	-
Unigene0000984	300	8	1.4469	1	0.1597	gi|147787145|emb|CAN73484.1|	58.2	6e-08	hypothetical protein VITISV_029448 [Vitis vinifera]	--	--	--	--	--	--	--	--	--	--	--	--	--	--	GO:0006259//DNA metabolic process	GO:0005488//binding	-
Unigene0000985	212	3	0.7678	1	0.226	--	--	--	--	--	--	--	--	--	--	--	--	--	--	--	--	--	--	-	-	-
Unigene0000986	287	6	1.1344	0	0	--	--	--	--	--	--	--	--	--	--	--	--	--	--	--	--	--	--	-	-	-
Unigene0000987	271	7	1.4016	8	1.4146	gi|508709023|gb|EOY00920.1|	86.7	2e-16	Heavy metal transport/detoxification superfamily protein isoform 6 [Theobroma cacao]	--	--	--	--	--	--	--	--	--	--	--	--	--	--	-	-	-
Unigene0000988	216	7	1.7584	1	0.2219	gi|508723882|gb|EOY15779.1|	102	2e-21	Cytochrome P450 [Theobroma cacao]	sp|Q9FG65|C81D1_ARATH	72	1e-12	Cytochrome P450 81D1 OS=Arabidopsis thaliana GN=CYP81D1 PE=2 SV=1	--	--	--	--	--	--	--	--	--	--	GO:0008152//metabolic process	GO:0016709//oxidoreductase activity, acting on paired donors, with incorporation or reduction of molecular oxygen, NADH or NADPH as one donor, and incorporation of one atom of oxygen;GO:0005506//iron ion binding	-
Unigene0000989	269	6	1.2103	1	0.1781	gi|508784150|gb|EOY31406.1|	105	4e-22	Pleiotropic drug resistance 12 [Theobroma cacao]	sp|Q8GU92|PDR2_ORYSJ	103	5e-22	Probable pleiotropic drug resistance protein 2 OS=Oryza sativa subsp. japonica GN=PDR2 PE=3 SV=1	YDR406w_3	55.5	2e-08	COG1131	ABC-type multidrug transport system, ATPase component	--	--	--	--	--	GO:0009207;GO:0042221//response to chemical stimulus;GO:0046865//terpenoid transport;GO:0030001//metal ion transport	GO:0042626//ATPase activity, coupled to transmembrane movement of substances;GO:0015604//organic phosphonate transmembrane transporter activity;GO:0032559	-
Unigene0000990	208	3	0.7826	2	0.4608	--	--	--	--	--	--	--	--	--	--	--	--	--	--	--	--	--	--	-	-	-
Unigene0000991	550	14	1.3812	8	0.697	--	--	--	--	--	--	--	--	--	--	--	--	--	--	--	--	--	--	-	-	-
Unigene0000992	261	6	1.2474	3	0.5508	gi|508783847|gb|EOY31103.1|	52.8	2e-06	Thylakoid lumenal 16.5 kDa protein [Theobroma cacao]	--	--	--	--	--	--	--	--	--	--	--	--	--	--	-	-	-
Unigene0000993	214	4	1.0142	1	0.2239	gi|255544922|ref|XP_002513522.1|	82.8	2e-15	conserved hypothetical protein [Ricinus communis]	--	--	--	--	--	--	--	--	--	--	--	--	--	--	-	-	-
Unigene0000994	233	5	1.1644	2	0.4113	gi|359477252|ref|XP_003631953.1|	103	2e-21	PREDICTED: LOW QUALITY PROTEIN: Fanconi anemia group I protein-like [Vitis vinifera]	--	--	--	--	--	--	--	--	--	K10895	4e-18	89.4	pop:POPTR_768656	fanconi anemia group I protein	-	-	GO:0005911//cell-cell junction
Unigene0000995	447	11	1.3353	0	0	--	--	--	--	--	--	--	--	--	--	--	--	--	--	--	--	--	--	-	-	-
Unigene0000996	381	9	1.2817	4	0.5031	--	--	--	--	--	--	--	--	--	--	--	--	--	--	--	--	--	--	-	-	-
Unigene0000997	260	5	1.0435	0	0	gi|422292778|gb|EKU20080.1|	155	3e-37	F-type H+-transporting ATPase subunit beta, partial [Nannochloropsis gaditana CCMP526]	sp|Q07233|ATPB_SCHGA	171	2e-42	ATP synthase subunit beta, mitochondrial (Fragment) OS=Schizaphis graminum PE=1 SV=1	YJR121w	156	1e-38	COG0055	F0F1-type ATP synthase, beta subunit	K02133	2e-36	150	ath:AT5G08680	F-type H+-transporting ATPase subunit beta [EC:3.6.3.14]	GO:0015988//energy coupled proton transport, against electrochemical gradient;GO:0009207;GO:0006754//ATP biosynthetic process;GO:0010038//response to metal ion;GO:0006950//response to stress	GO:0046914//transition metal ion binding;GO:0019829//cation-transporting ATPase activity;GO:0015078//hydrogen ion transmembrane transporter activity;GO:0032559;GO:0008187//poly-pyrimidine tract binding;GO:0015662//ATPase activity, coupled to transmembrane movement of ions, phosphorylative mechanism	GO:0033178//proton-transporting two-sector ATPase complex, catalytic domain;GO:0044455;GO:0044434//chloroplast part;GO:0043232;GO:0009526//plastid envelope
Unigene0000998	331	7	1.1475	0	0	gi|159466892|ref|XP_001691632.1|	190	9e-48	beta subunit of mitochondrial ATP synthase [Chlamydomonas reinhardtii]	sp|Q05825|ATPB_DROME	208	1e-53	ATP synthase subunit beta, mitochondrial OS=Drosophila melanogaster GN=ATPsyn-beta PE=2 SV=3	Cj0107	173	6e-44	COG0055	F0F1-type ATP synthase, beta subunit	K02133	1e-48	190	vcn:VOLCADRAFT_80433	F-type H+-transporting ATPase subunit beta [EC:3.6.3.14]	GO:0015988//energy coupled proton transport, against electrochemical gradient;GO:0009207;GO:0006754//ATP biosynthetic process;GO:0010038//response to metal ion;GO:0006950//response to stress	GO:0046914//transition metal ion binding;GO:0019829//cation-transporting ATPase activity;GO:0015078//hydrogen ion transmembrane transporter activity;GO:0032559;GO:0008187//poly-pyrimidine tract binding;GO:0015662//ATPase activity, coupled to transmembrane movement of ions, phosphorylative mechanism	GO:0033178//proton-transporting two-sector ATPase complex, catalytic domain;GO:0044455;GO:0044434//chloroplast part;GO:0019866//organelle inner membrane;GO:0043232;GO:0009526//plastid envelope
Unigene0000999	363	11	1.6442	2	0.264	--	--	--	--	--	--	--	--	--	--	--	--	--	--	--	--	--	--	-	-	-
Unigene0001000	222	6	1.4665	1	0.2159	--	--	--	--	--	--	--	--	--	--	--	--	--	--	--	--	--	--	-	-	-
Unigene0001001	255	4	0.8511	1	0.1879	gi|359477316|ref|XP_002278812.2|	146	2e-34	PREDICTED: pyruvate, phosphate dikinase, chloroplastic-like [Vitis vinifera]	sp|Q42910|PPDK_MESCR	132	7e-31	Pyruvate, phosphate dikinase, chloroplastic OS=Mesembryanthemum crystallinum GN=PPD PE=2 SV=1	SMc00025	98.6	2e-21	COG0574	Phosphoenolpyruvate synthase/pyruvate phosphate dikinase	K01006	5e-35	145	vvi:100247690	pyruvate,orthophosphate dikinase [EC:2.7.9.1]	GO:0009314//response to radiation;GO:0006629//lipid metabolic process;GO:0005982//starch metabolic process;GO:0006796//phosphate-containing compound metabolic process	GO:0016781//phosphotransferase activity, paired acceptors;GO:0032559	GO:0009532//plastid stroma
Unigene0001002	251	4	0.8647	4	0.7637	gi|508723599|gb|EOY15496.1|	67.4	9e-11	Golgi-body localization protein domain isoform 4, partial [Theobroma cacao]	--	--	--	--	--	--	--	--	--	--	--	--	--	--	GO:0040007//growth;GO:0009725//response to hormone stimulus	-	GO:0016020//membrane
Unigene0001003	233	4	0.9315	0	0	--	--	--	--	--	--	--	--	--	--	--	--	--	--	--	--	--	--	-	-	-
Unigene0001004	263	6	1.2379	0	0	--	--	--	--	--	--	--	--	--	--	--	--	--	--	--	--	--	--	-	-	-
Unigene0001005	262	5	1.0355	3	0.5487	--	--	--	--	--	--	--	--	--	--	--	--	--	--	--	--	--	--	-	-	-
Unigene0001006	218	1	0.2489	1	0.2198	--	--	--	--	--	--	--	--	--	--	--	--	--	--	--	--	--	--	-	-	-
Unigene0001007	279	6	1.1669	3	0.5153	gi|502149624|ref|XP_004507603.1|	91.3	6e-18	PREDICTED: microtubule-associated protein 70-5-like [Cicer arietinum]	sp|Q8GYX3|MP705_ARATH	72.4	8e-13	Microtubule-associated protein 70-5 OS=Arabidopsis thaliana GN=MAP70.5 PE=1 SV=1	--	--	--	--	--	--	--	--	--	--	GO:0042546//cell wall biogenesis;GO:0003002//regionalization	-	-
Unigene0001008	217	2	0.5001	1	0.2208	gi|225469059|ref|XP_002267938.1|	76.3	2e-13	PREDICTED: microtubule-associated protein 70-5-like [Vitis vinifera]	sp|Q8GYX3|MP705_ARATH	50.8	3e-06	Microtubule-associated protein 70-5 OS=Arabidopsis thaliana GN=MAP70.5 PE=1 SV=1	--	--	--	--	--	--	--	--	--	--	-	-	-
Unigene0001009	260	4	0.8348	3	0.5529	gi|462416152|gb|EMJ20889.1|	96.3	2e-19	hypothetical protein PRUPE_ppa025671mg, partial [Prunus persica]	--	--	--	--	--	--	--	--	--	--	--	--	--	--	-	-	-
Unigene0001010	280	5	0.9689	3	0.5134	gi|508712516|gb|EOY04413.1|	171	6e-42	Leucine-rich repeat protein kinase family protein isoform 1 [Theobroma cacao]	sp|Q9C9Y8|Y3868_ARATH	163	3e-40	Probable inactive receptor kinase At3g08680 OS=Arabidopsis thaliana GN=At3g08680 PE=1 SV=1	--	--	--	--	--	--	--	--	--	--	GO:0006464//protein modification process;GO:0006796//phosphate-containing compound metabolic process	GO:0004672//protein kinase activity;GO:0032559	GO:0043231//intracellular membrane-bounded organelle;GO:0031224//intrinsic to membrane
Unigene0001011	550	18	1.7758	6	0.5228	--	--	--	--	--	--	--	--	--	--	--	--	--	--	--	--	--	--	-	-	-
Unigene0001012	236	6	1.3795	0	0	--	--	--	--	--	--	--	--	--	--	--	--	--	--	--	--	--	--	-	-	-
Unigene0001013	205	5	1.3234	0	0	gi|224136770|ref|XP_002322411.1|	58.9	3e-08	predicted protein [Populus trichocarpa]	--	--	--	--	--	--	--	--	--	--	--	--	--	--	-	GO:0003824//catalytic activity	-
Unigene0001014	209	3	0.7789	0	0	gi|449488669|ref|XP_004158137.1|	114	5e-25	PREDICTED: uncharacterized LOC101210685 [Cucumis sativus]	--	--	--	--	--	--	--	--	--	--	--	--	--	--	GO:0006259//DNA metabolic process	GO:0016830//carbon-carbon lyase activity	GO:0043231//intracellular membrane-bounded organelle
Unigene0001015	297	3	0.5481	1	0.1613	--	--	--	--	--	--	--	--	--	--	--	--	--	--	--	--	--	--	-	-	-
Unigene0001016	238	5	1.1399	9	1.8121	gi|470138582|ref|XP_004305034.1|	53.1	2e-06	PREDICTED: LOW QUALITY PROTEIN: sugar transporter ERD6-like [Fragaria vesca subsp. vesca]	--	--	--	--	--	--	--	--	--	--	--	--	--	--	-	-	-
Unigene0001017	220	5	1.2332	2	0.4356	--	--	--	--	--	--	--	--	--	--	--	--	--	--	--	--	--	--	-	-	-
Unigene0001018	244	4	0.8895	2	0.3928	--	--	--	--	--	--	--	--	--	--	--	--	--	--	--	--	--	--	-	-	-
Unigene0001019	932	38	2.2123	17	0.8741	gi|508707473|gb|EOX99369.1|	238	2e-61	F21B7.22 [Theobroma cacao]	--	--	--	--	--	--	--	--	--	--	--	--	--	--	-	-	-
Unigene0001020	353	10	1.5371	5	0.6788	gi|508707473|gb|EOX99369.1|	124	6e-28	F21B7.22 [Theobroma cacao]	--	--	--	--	--	--	--	--	--	--	--	--	--	--	-	-	-
Unigene0001021	388	2	0.2797	4	0.494	gi|224138516|ref|XP_002326622.1|	105	2e-22	predicted protein [Populus trichocarpa]	--	--	--	--	--	--	--	--	--	--	--	--	--	--	-	-	-
Unigene0001022	230	3	0.7077	0	0	--	--	--	--	--	--	--	--	--	--	--	--	--	--	--	--	--	--	-	-	-
Unigene0001023	240	3	0.6783	0	0	--	--	--	--	--	--	--	--	--	--	--	--	--	--	--	--	--	--	-	-	-
Unigene0001024	209	3	0.7789	1	0.2293	--	--	--	--	--	--	--	--	--	--	--	--	--	--	--	--	--	--	-	-	-
Unigene0001025	234	6	1.3913	1	0.2048	--	--	--	--	--	--	--	--	--	--	--	--	--	--	--	--	--	--	-	-	-
Unigene0001026	279	5	0.9724	2	0.3435	--	--	--	--	--	--	--	--	--	--	--	--	--	--	--	--	--	--	-	-	-
Unigene0001027	241	6	1.3509	1	0.1988	gi|412987775|emb|CCO19171.1|	52	4e-06	unnamed protein product [Bathycoccus prasinos]	sp|O15417|TNC18_HUMAN	49.7	6e-06	Trinucleotide repeat-containing gene 18 protein OS=Homo sapiens GN=TNRC18 PE=1 SV=3	XF1267	48.9	2e-06	COG5297	Cellobiohydrolase A (1,4-beta-cellobiosidase A)	--	--	--	--	--	-	-	-
Unigene0001028	236	5	1.1496	2	0.4061	--	--	--	--	--	--	--	--	--	--	--	--	--	--	--	--	--	--	-	-	-
Unigene0001029	214	3	0.7607	0	0	--	--	--	--	--	--	--	--	--	--	--	--	--	--	--	--	--	--	-	-	-
Unigene0001030	265	6	1.2285	4	0.7233	--	--	--	--	--	--	--	--	--	--	--	--	--	--	--	--	--	--	-	-	-
Unigene0001031	505	14	1.5042	4	0.3796	gi|449518645|ref|XP_004166347.1|	46.6	7e-07	PREDICTED: uncharacterized LOC101208571 [Cucumis sativus]	--	--	--	--	--	--	--	--	--	--	--	--	--	--	-	-	-
Unigene0001032	523	11	1.1412	1	0.0916	gi|359496902|ref|XP_003635365.1|	93.6	2e-18	PREDICTED: transcription factor bHLH36-like, partial [Vitis vinifera]	--	--	--	--	--	--	--	--	--	--	--	--	--	--	-	-	-
Unigene0001033	221	5	1.2276	2	0.4337	--	--	--	--	--	--	--	--	--	--	--	--	--	--	--	--	--	--	-	-	-
Unigene0001034	354	10	1.5328	3	0.4061	--	--	--	--	--	--	--	--	--	--	--	--	--	--	--	--	--	--	-	-	-
Unigene0001035	335	6	0.9718	3	0.4291	gi|307136083|gb|ADN33931.1|	98.6	4e-20	serine/threonine protein kinase [Cucumis melo subsp. melo]	--	--	--	--	--	--	--	--	--	--	--	--	--	--	GO:0006464//protein modification process;GO:0006796//phosphate-containing compound metabolic process	GO:0004672//protein kinase activity;GO:0032559	GO:0016020//membrane
Unigene0001036	207	3	0.7864	0	0	--	--	--	--	--	--	--	--	--	--	--	--	--	--	--	--	--	--	-	-	-
Unigene0001037	268	3	0.6074	1	0.1788	--	--	--	--	--	--	--	--	--	--	--	--	--	--	--	--	--	--	-	-	-
Unigene0001038	298	6	1.0925	0	0	gi|114216032|gb|ABI54627.1|	157	5e-38	ATPase alpha subunit [Klebsormidium flaccidum]	sp|Q5R546|ATPA_PONAB	178	1e-44	ATP synthase subunit alpha, mitochondrial OS=Pongo abelii GN=ATP5A1 PE=2 SV=1	SMc02499	158	2e-39	COG0056	F0F1-type ATP synthase, alpha subunit	K02132	4e-36	149	zma:100273100	F-type H+-transporting ATPase subunit alpha [EC:3.6.3.14]	GO:0006754//ATP biosynthetic process;GO:0015988//energy coupled proton transport, against electrochemical gradient	GO:0015078//hydrogen ion transmembrane transporter activity;GO:0019829//cation-transporting ATPase activity;GO:0032559	GO:0043231//intracellular membrane-bounded organelle;GO:0033178//proton-transporting two-sector ATPase complex, catalytic domain
Unigene0001039	224	4	0.9689	1	0.2139	--	--	--	--	--	--	--	--	--	--	--	--	--	--	--	--	--	--	-	-	-
Unigene0001040	207	3	0.7864	1	0.2315	--	--	--	--	--	--	--	--	--	--	--	--	--	--	--	--	--	--	-	-	-
Unigene0001041	252	4	0.8613	1	0.1902	--	--	--	--	--	--	--	--	--	--	--	--	--	--	--	--	--	--	-	-	-
Unigene0001042	275	6	1.1839	1	0.1743	--	--	--	--	--	--	--	--	--	--	--	--	--	--	--	--	--	--	-	-	-
Unigene0001043	233	3	0.6986	1	0.2057	--	--	--	--	--	--	--	--	--	--	--	--	--	--	--	--	--	--	-	-	-
Unigene0001044	441	13	1.5995	6	0.652	--	--	--	--	--	--	--	--	--	--	--	--	--	--	--	--	--	--	-	-	-
Unigene0001045	332	9	1.4709	2	0.2887	gi|225435590|ref|XP_002283233.1|	135	4e-31	PREDICTED: G-type lectin S-receptor-like serine/threonine-protein kinase RLK1-like [Vitis vinifera]	sp|Q39202|RLK1_ARATH	94.4	2e-19	G-type lectin S-receptor-like serine/threonine-protein kinase RLK1 OS=Arabidopsis thaliana GN=RLK1 PE=2 SV=2	--	--	--	--	--	--	--	--	--	--	-	GO:0005488//binding;GO:0004672//protein kinase activity	-
Unigene0001046	203	7	1.871	6	1.4164	--	--	--	--	--	--	--	--	--	--	--	--	--	--	--	--	--	--	-	-	-
Unigene0001047	267	6	1.2193	4	0.7179	--	--	--	--	--	--	--	--	--	--	--	--	--	--	--	--	--	--	-	-	-
Unigene0001048	320	5	0.8478	0	0	--	--	--	--	--	--	--	--	--	--	--	--	--	--	--	--	--	--	-	-	-
Unigene0001049	426	5	0.6369	0	0	--	--	--	--	--	--	--	--	--	--	--	--	--	--	--	--	--	--	-	-	-
Unigene0001050	354	5	0.7664	5	0.6768	gi|357436403|ref|XP_003588477.1|	52.8	2e-15	Appr-1-p processing enzyme family protein [Medicago truncatula]	--	--	--	--	--	--	--	--	--	--	--	--	--	--	-	-	-
Unigene0001051	229	5	1.1847	11	2.3019	--	--	--	--	--	--	--	--	--	--	--	--	--	--	--	--	--	--	-	-	-
Unigene0001052	202	3	0.8058	3	0.7117	--	--	--	--	--	--	--	--	--	--	--	--	--	--	--	--	--	--	-	-	-
Unigene0001053	340	7	1.1171	4	0.5638	--	--	--	--	--	--	--	--	--	--	--	--	--	--	--	--	--	--	-	-	-
Unigene0001054	372	5	0.7293	2	0.2576	--	--	--	--	--	--	--	--	--	--	--	--	--	--	--	--	--	--	-	-	-
Unigene0001055	241	4	0.9006	1	0.1988	gi|359476049|ref|XP_002281624.2|	88.2	5e-17	PREDICTED: LOW QUALITY PROTEIN: DNA polymerase theta-like [Vitis vinifera]	--	--	--	--	--	--	--	--	--	K02349	1e-17	88.2	vvi:100264582	DNA polymerase theta subunit [EC:2.7.7.7]	GO:0006259//DNA metabolic process;GO:0060255;GO:0009639//response to red or far red light	GO:0003676//nucleic acid binding;GO:0042623//ATPase activity, coupled;GO:0032559;GO:0034061	-
Unigene0001056	214	5	1.2678	4	0.8957	--	--	--	--	--	--	--	--	--	--	--	--	--	--	--	--	--	--	-	-	-
Unigene0001057	202	4	1.0745	0	0	gi|225430083|ref|XP_002284514.1|	75.9	3e-13	PREDICTED: bifunctional aspartate aminotransferase and glutamate/aspartate-prephenate aminotransferase [Vitis vinifera]	--	--	--	--	--	--	--	--	--	--	--	--	--	--	GO:0008152//metabolic process	GO:0048037//cofactor binding;GO:0016769//transferase activity, transferring nitrogenous groups	-
Unigene0001058	281	6	1.1586	3	0.5116	gi|225438311|ref|XP_002272735.1|	175	3e-43	PREDICTED: ammonium transporter 3 member 1-like [Vitis vinifera]	sp|Q851M9|AMT32_ORYSJ	167	2e-41	Ammonium transporter 3 member 2 OS=Oryza sativa subsp. japonica GN=AMT3-2 PE=2 SV=1	SSO1054	89.7	1e-18	COG0004	Ammonia permease	--	--	--	--	--	GO:0006259//DNA metabolic process;GO:0015696//ammonium transport	GO:0005488//binding;GO:0015101//organic cation transmembrane transporter activity	GO:0031224//intrinsic to membrane
Unigene0001059	206	4	1.0536	0	0	--	--	--	--	--	--	--	--	--	--	--	--	--	--	--	--	--	--	-	-	-
Unigene0001060	208	5	1.3043	2	0.4608	--	--	--	--	--	--	--	--	--	--	--	--	--	--	--	--	--	--	-	-	-
Unigene0001061	441	8	0.9843	4	0.4347	--	--	--	--	--	--	--	--	--	--	--	--	--	--	--	--	--	--	-	-	-
Unigene0001062	231	5	1.1745	1	0.2074	--	--	--	--	--	--	--	--	--	--	--	--	--	--	--	--	--	--	-	-	-
Unigene0001063	258	4	0.8412	2	0.3715	gi|502122755|ref|XP_004497885.1|	97.4	8e-20	PREDICTED: centromere-associated protein E-like [Cicer arietinum]	--	--	--	--	--	--	--	--	--	K11498	2e-19	94	vvi:100252135	centromeric protein E	-	-	-
Unigene0001064	220	5	1.2332	0	0	--	--	--	--	--	--	--	--	--	--	--	--	--	--	--	--	--	--	-	-	-
Unigene0001065	216	5	1.256	6	1.3311	gi|449496587|ref|XP_004160172.1|	94	9e-19	PREDICTED: uncharacterized LOC101211174 [Cucumis sativus]	--	--	--	--	--	--	--	--	--	--	--	--	--	--	GO:0016070//RNA metabolic process	-	GO:0044464//cell part
Unigene0001066	232	6	1.4033	0	0	--	--	--	--	--	--	--	--	--	--	--	--	--	--	--	--	--	--	-	-	-
Unigene0001067	232	5	1.1694	1	0.2066	--	--	--	--	--	--	--	--	--	--	--	--	--	--	--	--	--	--	-	-	-
Unigene0001068	500	15	1.6278	4	0.3834	--	--	--	--	--	--	--	--	--	--	--	--	--	--	--	--	--	--	-	-	-
Unigene0001069	233	4	0.9315	0	0	--	--	--	--	--	--	--	--	--	--	--	--	--	--	--	--	--	--	-	-	-
Unigene0001070	229	7	1.6586	2	0.4185	gi|40823465|gb|AAR92284.1|	110	7e-24	At1g73850 [Arabidopsis thaliana]	--	--	--	--	--	--	--	--	--	--	--	--	--	--	GO:0034645//cellular macromolecule biosynthetic process	GO:0005198//structural molecule activity	GO:0030529//ribonucleoprotein complex
Unigene0001071	226	7	1.6806	3	0.6361	--	--	--	--	--	--	--	--	--	--	--	--	--	--	--	--	--	--	-	-	-
Unigene0001072	446	10	1.2166	6	0.6447	--	--	--	--	--	--	--	--	--	--	--	--	--	--	--	--	--	--	-	-	-
Unigene0001073	321	9	1.5213	2	0.2986	--	--	--	--	--	--	--	--	--	--	--	--	--	--	--	--	--	--	-	-	-
Unigene0001074	280	5	0.9689	3	0.5134	--	--	--	--	--	--	--	--	--	--	--	--	--	--	--	--	--	--	-	-	-
Unigene0001075	210	3	0.7751	0	0	gi|310753567|gb|ADP20180.1|	68.2	6e-11	mutant gag-pol polyprotein [Pisum sativum]	--	--	--	--	--	--	--	--	--	--	--	--	--	--	GO:0006260//DNA replication	GO:0046914//transition metal ion binding;GO:0003676//nucleic acid binding;GO:0034061	-
Unigene0001076	235	3	0.6927	1	0.2039	gi|225435894|ref|XP_002266116.1|	160	6e-39	PREDICTED: transcription factor GAMYB-like [Vitis vinifera]	sp|Q0JIC2|GAM1_ORYSJ	144	2e-34	Transcription factor GAMYB OS=Oryza sativa subsp. japonica GN=GAM1 PE=2 SV=1	ECU11g1690	91.3	4e-19	COG5147	Myb superfamily proteins, including transcription factors and mRNA splicing factors	K09422	1e-39	160	vvi:100246221	myb proto-oncogene protein, plant	-	GO:0003676//nucleic acid binding	-
Unigene0001077	212	6	1.5357	2	0.4521	--	--	--	--	--	--	--	--	--	--	--	--	--	--	--	--	--	--	-	-	-
Unigene0001078	227	5	1.1952	1	0.2111	gi|502126388|ref|XP_004499289.1|	115	3e-25	PREDICTED: ABC transporter B family member 13-like [Cicer arietinum]	sp|Q9C7F8|AB13B_ARATH	95.1	1e-19	ABC transporter B family member 13 OS=Arabidopsis thaliana GN=ABCB13 PE=3 SV=1	FN0598	83.2	1e-16	COG1132	ABC-type multidrug transport system, ATPase and permease components	--	--	--	--	--	GO:0006810//transport;GO:0009207	GO:0042626//ATPase activity, coupled to transmembrane movement of substances;GO:0032559	GO:0031224//intrinsic to membrane
Unigene0001079	233	4	0.9315	0	0	--	--	--	--	--	--	--	--	--	--	--	--	--	--	--	--	--	--	-	-	-
Unigene0001080	520	13	1.3565	1	0.0922	gi|145350813|ref|XP_001419792.1|	171	6e-42	Ribosomal protein S9, component of cytosolic 80S ribosome and 40S small subunit [Ostreococcus lucimarinus CCE9901]	sp|P52810|RS9_PODAS	182	1e-45	40S ribosomal protein S9 OS=Podospora anserina GN=RPS9 PE=3 SV=1	SPAC24H6.07	166	2e-41	COG0522	Ribosomal protein S4 and related proteins	K02997	1e-42	171	olu:OSTLU_94716	small subunit ribosomal protein S9e	GO:0034645//cellular macromolecule biosynthetic process	GO:0003723//RNA binding;GO:0005198//structural molecule activity	GO:0016020//membrane;GO:0030312//external encapsulating structure;GO:0009536//plastid;GO:0044391
Unigene0001081	212	9	2.3035	0	0	--	--	--	--	--	--	--	--	--	--	--	--	--	--	--	--	--	--	-	-	-
Unigene0001082	312	8	1.3913	2	0.3072	gi|224132258|ref|XP_002328224.1|	89	3e-17	cc-nbs-lrr resistance protein [Populus trichocarpa]	--	--	--	--	--	--	--	--	--	--	--	--	--	--	-	-	-
Unigene0001083	220	3	0.7399	2	0.4356	--	--	--	--	--	--	--	--	--	--	--	--	--	--	--	--	--	--	-	-	-
Unigene0001084	213	4	1.019	0	0	--	--	--	--	--	--	--	--	--	--	--	--	--	--	--	--	--	--	-	-	-
Unigene0001085	250	6	1.3022	4	0.7667	--	--	--	--	--	--	--	--	--	--	--	--	--	--	--	--	--	--	-	-	-
Unigene0001086	321	7	1.1832	3	0.4479	gi|508775234|gb|EOY22490.1|	173	9e-43	Pyridoxal phosphate-dependent transferases superfamily protein [Theobroma cacao]	--	--	--	--	--	--	--	--	--	--	--	--	--	--	-	GO:0048037//cofactor binding	-
Unigene0001087	627	18	1.5577	4	0.3057	gi|393191329|gb|AFN06073.1|	180	8e-48	sieve element occlusion protein 2 [Nicotiana tabacum]	--	--	--	--	--	--	--	--	--	--	--	--	--	--	-	-	-
Unigene0001088	234	4	0.9275	1	0.2048	--	--	--	--	--	--	--	--	--	--	--	--	--	--	--	--	--	--	-	-	-
Unigene0001089	284	5	0.9553	2	0.3375	gi|470104667|ref|XP_004288719.1|	52.4	3e-06	PREDICTED: F-box/FBD/LRR-repeat protein At1g16930-like [Fragaria vesca subsp. vesca]	--	--	--	--	--	--	--	--	--	--	--	--	--	--	-	-	-
Unigene0001090	268	5	1.0123	0	0	gi|38325811|gb|AAR17078.1|	179	2e-44	heat shock protein 70-1 [Nicotiana tabacum]	sp|Q01233|HSP70_NEUCR	149	4e-36	Heat shock 70 kDa protein OS=Neurospora crassa (strain ATCC 24698 / 74-OR23-1A / CBS 708.71 / DSM 1257 / FGSC 987) GN=hsps-1 PE=2 SV=2	SPAC13G7.02c	115	1e-26	COG0443	Molecular chaperone	K03283	8e-22	101	osa:4334598	heat shock 70kDa protein 1/8	GO:0050896//response to stimulus	GO:0032559	-
Unigene0001091	248	4	0.8752	2	0.3865	--	--	--	--	--	--	--	--	--	--	--	--	--	--	--	--	--	--	-	-	-
Unigene0001092	287	8	1.5125	4	0.6679	gi|508721907|gb|EOY13804.1|	159	1e-38	Pentatricopeptide repeat (PPR) superfamily protein [Theobroma cacao]	sp|A3KPF8|PP131_ARATH	138	9e-33	Pentatricopeptide repeat-containing protein At1g79080, chloroplastic OS=Arabidopsis thaliana GN=At1g79080 PE=2 SV=1	--	--	--	--	--	--	--	--	--	--	-	-	-
Unigene0001093	201	5	1.3498	2	0.4768	--	--	--	--	--	--	--	--	--	--	--	--	--	--	--	--	--	--	-	-	-
Unigene0001094	231	4	0.9396	0	0	--	--	--	--	--	--	--	--	--	--	--	--	--	--	--	--	--	--	-	-	-
Unigene0001095	261	11	2.2868	2	0.3672	--	--	--	--	--	--	--	--	--	--	--	--	--	--	--	--	--	--	-	-	-
Unigene0001096	211	3	0.7715	3	0.6813	--	--	--	--	--	--	--	--	--	--	--	--	--	--	--	--	--	--	-	-	-
Unigene0001097	201	2	0.5399	0	0	--	--	--	--	--	--	--	--	--	--	--	--	--	--	--	--	--	--	-	-	-
Unigene0001098	386	4	0.5623	1	0.1241	--	--	--	--	--	--	--	--	--	--	--	--	--	--	--	--	--	--	-	-	-
Unigene0001099	209	4	1.0385	1	0.2293	gi|359473976|ref|XP_002272035.2|	57.4	1e-07	PREDICTED: ankyrin repeat domain-containing protein 17-like [Vitis vinifera]	--	--	--	--	--	--	--	--	--	--	--	--	--	--	-	-	-
Unigene0001100	605	12	1.0762	5	0.396	gi|225016150|gb|ACN78974.1|	96.7	3e-19	retrotransposon protein [Glycine max]	--	--	--	--	--	--	--	--	--	--	--	--	--	--	GO:0006259//DNA metabolic process;GO:0034645//cellular macromolecule biosynthetic process	GO:0003676//nucleic acid binding;GO:0003824//catalytic activity	-
Unigene0001101	349	11	1.7102	2	0.2746	--	--	--	--	--	--	--	--	--	--	--	--	--	--	--	--	--	--	-	-	-
Unigene0001102	217	3	0.7501	2	0.4417	--	--	--	--	--	--	--	--	--	--	--	--	--	--	--	--	--	--	-	-	-
Unigene0001103	247	1	0.2197	3	0.582	--	--	--	--	--	--	--	--	--	--	--	--	--	--	--	--	--	--	-	-	-
Unigene0001104	204	5	1.3299	1	0.2349	--	--	--	--	--	--	--	--	--	--	--	--	--	--	--	--	--	--	-	-	-
Unigene0001105	348	10	1.5592	4	0.5508	gi|508706835|gb|EOX98731.1|	186	1e-46	Minichromosome maintenance 9 isoform 2 [Theobroma cacao]	sp|F1N2W9|MCM9_BOVIN	60.8	3e-09	DNA helicase MCM9 OS=Bos taurus GN=MCM9 PE=3 SV=2	--	--	--	--	--	K10738	1e-47	187	rcu:RCOM_0821870	minichromosome maintenance protein 9	GO:0006259//DNA metabolic process	GO:0003676//nucleic acid binding;GO:0016462//pyrophosphatase activity;GO:0032559	-
Unigene0001106	202	4	1.0745	1	0.2372	gi|449479080|ref|XP_004155499.1|	80.9	8e-15	PREDICTED: DNA helicase MCM9-like [Cucumis sativus]	--	--	--	--	--	--	--	--	--	K10738	1e-12	71.2	rcu:RCOM_0821870	minichromosome maintenance protein 9	GO:0006259//DNA metabolic process	GO:0003676//nucleic acid binding;GO:0016462//pyrophosphatase activity;GO:0032559	-
Unigene0001107	270	7	1.4067	1	0.1775	gi|514730806|ref|XP_004957029.1|	61.6	5e-09	PREDICTED: zinc-binding alcohol dehydrogenase domain-containing protein 2-like [Setaria italica]	sp|O08699|PGDH_RAT	89.7	5e-18	15-hydroxyprostaglandin dehydrogenase [NAD(+)] OS=Rattus norvegicus GN=Hpgd PE=2 SV=2	lin2278	60.8	6e-10	COG1028	Dehydrogenases with different specificities (related to short-chain alcohol dehydrogenases)	K00069	3e-10	63.2	ppp:PHYPADRAFT_234045	15-hydroxyprostaglandin dehydrogenase (NAD) [EC:1.1.1.141]	-	-	-
Unigene0001108	245	4	0.8859	2	0.3912	gi|508716644|gb|EOY08541.1|	113	1e-24	Calcium dependent protein kinase 1 [Theobroma cacao]	sp|Q9SJ61|CDPKP_ARATH	99	8e-21	Calcium-dependent protein kinase 25 OS=Arabidopsis thaliana GN=CPK25 PE=2 SV=1	--	--	--	--	--	K13412	1e-24	111	rcu:RCOM_0422070	calcium-dependent protein kinase [EC:2.7.11.1]	GO:0006464//protein modification process;GO:0006796//phosphate-containing compound metabolic process	GO:0046872//metal ion binding;GO:0004674//protein serine/threonine kinase activity;GO:0032559	GO:0043231//intracellular membrane-bounded organelle;GO:0044444//cytoplasmic part
Unigene0001109	252	3	0.646	3	0.5705	--	--	--	--	--	--	--	--	--	--	--	--	--	--	--	--	--	--	-	-	-
Unigene0001110	264	6	1.2332	2	0.363	--	--	--	--	--	--	--	--	--	--	--	--	--	--	--	--	--	--	-	-	-
Unigene0001111	262	4	0.8284	4	0.7316	--	--	--	--	--	--	--	--	--	--	--	--	--	--	--	--	--	--	-	-	-
Unigene0001112	222	5	1.2221	3	0.6476	gi|255546355|ref|XP_002514237.1|	74.7	6e-13	conserved hypothetical protein [Ricinus communis]	--	--	--	--	--	--	--	--	--	--	--	--	--	--	GO:0009743//response to carbohydrate stimulus	-	GO:0043231//intracellular membrane-bounded organelle
Unigene0001113	226	5	1.2004	4	0.8482	gi|224132248|ref|XP_002321292.1|	60.1	1e-08	SET domain protein [Populus trichocarpa]	sp|Q9FNC7|SUVR2_ARATH	54.7	2e-07	Histone-lysine N-methyltransferase SUVR2 OS=Arabidopsis thaliana GN=SUVR2 PE=2 SV=2	--	--	--	--	--	--	--	--	--	--	GO:0016568//chromatin modification;GO:0032259//methylation	GO:0008168//methyltransferase activity	GO:0043232;GO:0009536//plastid
Unigene0001114	217	10	2.5005	2	0.4417	gi|470142898|ref|XP_004307127.1|	109	2e-23	PREDICTED: protochlorophyllide-dependent translocon component 52, chloroplastic-like [Fragaria vesca subsp. vesca]	sp|Q8W496|PTC52_ARATH	103	4e-22	Protochlorophyllide-dependent translocon component 52, chloroplastic OS=Arabidopsis thaliana GN=PTC52 PE=2 SV=1	--	--	--	--	--	--	--	--	--	--	GO:0008152//metabolic process	GO:0016703;GO:0043169//cation binding;GO:0051536//iron-sulfur cluster binding	GO:0009526//plastid envelope
Unigene0001115	280	7	1.3565	4	0.6846	--	--	--	--	--	--	--	--	--	--	--	--	--	--	--	--	--	--	-	-	-
Unigene0001116	206	4	1.0536	2	0.4653	--	--	--	--	--	--	--	--	--	--	--	--	--	--	--	--	--	--	-	-	-
Unigene0001117	201	3	0.8099	0	0	--	--	--	--	--	--	--	--	--	--	--	--	--	--	--	--	--	--	-	-	-
Unigene0001118	253	7	1.5013	1	0.1894	--	--	--	--	--	--	--	--	--	--	--	--	--	--	--	--	--	--	-	-	-
Unigene0001119	221	4	0.9821	2	0.4337	gi|530739209|gb|EQC37451.1|	68.6	4e-11	40S ribosomal protein S8 [Saprolegnia diclina VS20]	sp|Q9P7B2|RS8B_SCHPO	81.6	1e-15	40S ribosomal protein S8-B OS=Schizosaccharomyces pombe (strain 972 / ATCC 24843) GN=rps8b PE=1 SV=1	SPAC521.05	81.6	3e-16	COG2007	Ribosomal protein S8E	K02995	3e-09	60.1	cme:CMT159C	small subunit ribosomal protein S8e	GO:0034645//cellular macromolecule biosynthetic process	GO:0005198//structural molecule activity	GO:0030529//ribonucleoprotein complex
Unigene0001120	278	2	0.3904	1	0.1724	gi|449495187|ref|XP_004159759.1|	85.1	4e-16	PREDICTED: probable serine/threonine-protein kinase Cx32, chloroplastic-like [Cucumis sativus]	sp|Q06548|APK1A_ARATH	77	3e-14	Protein kinase APK1A, chloroplastic OS=Arabidopsis thaliana GN=APK1A PE=2 SV=1	--	--	--	--	--	--	--	--	--	--	GO:0006796//phosphate-containing compound metabolic process	GO:0004672//protein kinase activity;GO:0000166//nucleotide binding	-
Unigene0001121	245	2	0.4429	0	0	gi|449495187|ref|XP_004159759.1|	107	1e-22	PREDICTED: probable serine/threonine-protein kinase Cx32, chloroplastic-like [Cucumis sativus]	sp|Q06548|APK1A_ARATH	97.1	3e-20	Protein kinase APK1A, chloroplastic OS=Arabidopsis thaliana GN=APK1A PE=2 SV=1	--	--	--	--	--	--	--	--	--	--	GO:0006468//protein phosphorylation;GO:0051707//response to other organism	GO:0004672//protein kinase activity;GO:0000166//nucleotide binding	GO:0043231//intracellular membrane-bounded organelle
Unigene0001122	248	6	1.3127	1	0.1932	gi|508718037|gb|EOY09934.1|	63.5	1e-09	Phosphoprotein phosphatase [Theobroma cacao]	--	--	--	--	--	--	--	--	--	--	--	--	--	--	-	-	-
Unigene0001123	202	2	0.5372	0	0	--	--	--	--	--	--	--	--	--	--	--	--	--	--	--	--	--	--	-	-	-
Unigene0001124	418	4	0.5192	2	0.2293	--	--	--	--	--	--	--	--	--	--	--	--	--	--	--	--	--	--	-	-	-
Unigene0001125	201	3	0.8099	1	0.2384	--	--	--	--	--	--	--	--	--	--	--	--	--	--	--	--	--	--	-	-	-
Unigene0001126	739	42	3.0838	10	0.6485	gi|356506370|ref|XP_003521957.1|	302	6e-81	PREDICTED: probable LRR receptor-like serine/threonine-protein kinase At4g08850-like [Glycine max]	sp|Q8VZG8|Y4885_ARATH	248	3e-65	Probable LRR receptor-like serine/threonine-protein kinase At4g08850 OS=Arabidopsis thaliana GN=At4g08850 PE=1 SV=3	CAC0404_1	80.9	2e-15	COG0515	Serine/threonine protein kinase	--	--	--	--	--	GO:0006796//phosphate-containing compound metabolic process;GO:0006464//protein modification process	GO:0004672//protein kinase activity;GO:0032559	-
Unigene0001127	214	4	1.0142	2	0.4479	gi|225431699|ref|XP_002264607.1|	147	9e-35	PREDICTED: DNA topoisomerase 3-alpha [Vitis vinifera]	sp|O70157|TOP3A_MOUSE	75.5	1e-13	DNA topoisomerase 3-alpha OS=Mus musculus GN=Top3a PE=1 SV=1	ECU04g1070	73.2	1e-13	COG0550	Topoisomerase IA	K03165	8e-36	148	rcu:RCOM_1519060	DNA topoisomerase III [EC:5.99.1.2]	GO:0000280//nuclear division;GO:0032508//DNA duplex unwinding;GO:0051307//meiotic chromosome separation	GO:0046914//transition metal ion binding;GO:0003916//DNA topoisomerase activity	GO:0043232
Unigene0001128	434	21	2.6255	6	0.6625	gi|38345650|emb|CAE04414.2|	64.7	6e-10	OSJNBb0040D15.4 [Oryza sativa Japonica Group]	--	--	--	--	--	--	--	--	--	--	--	--	--	--	-	-	-
Unigene0001129	216	3	0.7536	1	0.2219	--	--	--	--	--	--	--	--	--	--	--	--	--	--	--	--	--	--	-	-	-
Unigene0001130	206	1	0.2634	0	0	--	--	--	--	--	--	--	--	--	--	--	--	--	--	--	--	--	--	-	-	-
Unigene0001131	787	28	1.9305	8	0.4871	gi|508723599|gb|EOY15496.1|	415	1e-115	Golgi-body localization protein domain isoform 4, partial [Theobroma cacao]	--	--	--	--	--	--	--	--	--	--	--	--	--	--	GO:0040007//growth;GO:0009725//response to hormone stimulus	-	GO:0016020//membrane
Unigene0001132	232	7	1.6372	2	0.4131	gi|359480846|ref|XP_002280702.2|	143	1e-33	PREDICTED: pentatricopeptide repeat-containing protein At2g22070-like [Vitis vinifera]	sp|Q9SHZ8|PP168_ARATH	142	7e-34	Pentatricopeptide repeat-containing protein At2g22070 OS=Arabidopsis thaliana GN=PCMP-H41 PE=3 SV=1	--	--	--	--	--	--	--	--	--	--	-	-	-
Unigene0001133	412	18	2.3706	3	0.3489	--	--	--	--	--	--	--	--	--	--	--	--	--	--	--	--	--	--	-	-	-
Unigene0001134	209	5	1.2981	2	0.4586	--	--	--	--	--	--	--	--	--	--	--	--	--	--	--	--	--	--	-	-	-
Unigene0001135	275	5	0.9865	3	0.5228	--	--	--	--	--	--	--	--	--	--	--	--	--	--	--	--	--	--	-	-	-
Unigene0001136	461	9	1.0593	6	0.6237	gi|356553651|ref|XP_003545167.1|	176	2e-43	PREDICTED: heat stress transcription factor B-4-like [Glycine max]	sp|Q7XHZ0|HFB4B_ORYSJ	125	8e-29	Heat stress transcription factor B-4b OS=Oryza sativa subsp. japonica GN=HSFB4B PE=2 SV=1	--	--	--	--	--	--	--	--	--	--	-	GO:0003677//DNA binding	-
Unigene0001137	238	4	0.9119	3	0.604	gi|356502004|ref|XP_003519812.1|	101	6e-21	PREDICTED: auxin-induced protein 5NG4-like [Glycine max]	sp|Q56X95|WTR23_ARATH	82.8	6e-16	WAT1-related protein At3g28130 OS=Arabidopsis thaliana GN=At3g28130 PE=2 SV=1	--	--	--	--	--	--	--	--	--	--	-	-	-
Unigene0001138	203	5	1.3365	1	0.2361	--	--	--	--	--	--	--	--	--	--	--	--	--	--	--	--	--	--	-	-	-
Unigene0001139	205	3	0.7941	2	0.4675	--	--	--	--	--	--	--	--	--	--	--	--	--	--	--	--	--	--	-	-	-
Unigene0001140	218	4	0.9956	0	0	--	--	--	--	--	--	--	--	--	--	--	--	--	--	--	--	--	--	-	-	-
Unigene0001141	202	2	0.5372	0	0	--	--	--	--	--	--	--	--	--	--	--	--	--	--	--	--	--	--	-	-	-
Unigene0001142	281	6	1.1586	4	0.6821	gi|508780061|gb|EOY27317.1|	55.1	5e-07	Nuclear pore complex protein Nup107 isoform 2, partial [Theobroma cacao]	--	--	--	--	--	--	--	--	--	K14301	1e-08	58.2	pop:POPTR_745842	nuclear pore complex protein Nup107	-	-	-
Unigene0001143	213	4	1.019	0	0	gi|297824471|ref|XP_002880118.1|	112	2e-24	glycosyl hydrolase family 1 protein [Arabidopsis lyrata subsp. lyrata]	sp|O64882|BGL17_ARATH	109	5e-24	Beta-glucosidase 17 OS=Arabidopsis thaliana GN=BGLU17 PE=2 SV=1	BS_yckE	77.8	4e-15	COG2723	Beta-glucosidase/6-phospho-beta-glucosidase/beta-galactosidase	K01188	7e-24	108	rcu:RCOM_0827440	beta-glucosidase [EC:3.2.1.21]	GO:0000904//cell morphogenesis involved in differentiation;GO:0044238//primary metabolic process	GO:0015926//glucosidase activity;GO:0043167//ion binding	GO:0005618//cell wall
Unigene0001144	219	3	0.7433	0	0	--	--	--	--	--	--	--	--	--	--	--	--	--	--	--	--	--	--	-	-	-
Unigene0001145	232	5	1.1694	0	0	--	--	--	--	--	--	--	--	--	--	--	--	--	--	--	--	--	--	-	-	-
Unigene0001146	344	9	1.4196	2	0.2786	--	--	--	--	--	--	--	--	--	--	--	--	--	--	--	--	--	--	-	-	-
Unigene0001147	363	7	1.0463	2	0.264	gi|359475149|ref|XP_003631601.1|	70.1	1e-11	PREDICTED: LOW QUALITY PROTEIN: cytochrome P450 82C2-like [Vitis vinifera]	sp|O49396|C82C3_ARATH	58.2	2e-08	Cytochrome P450 82C3 OS=Arabidopsis thaliana GN=CYP82C3 PE=2 SV=3	--	--	--	--	--	--	--	--	--	--	-	GO:0016491//oxidoreductase activity;GO:0005506//iron ion binding	-
Unigene0001148	208	3	0.7826	1	0.2304	--	--	--	--	--	--	--	--	--	--	--	--	--	--	--	--	--	--	-	-	-
Unigene0001149	225	3	0.7235	0	0	--	--	--	--	--	--	--	--	--	--	--	--	--	--	--	--	--	--	-	-	-
Unigene0001150	237	4	0.9158	3	0.6066	--	--	--	--	--	--	--	--	--	--	--	--	--	--	--	--	--	--	-	-	-
Unigene0001151	228	4	0.9519	3	0.6305	gi|508785420|gb|EOY32676.1|	82.4	3e-15	ARM repeat superfamily protein isoform 4 [Theobroma cacao]	--	--	--	--	--	--	--	--	--	--	--	--	--	--	-	-	GO:0031978
Unigene0001152	204	4	1.0639	0	0	--	--	--	--	--	--	--	--	--	--	--	--	--	--	--	--	--	--	-	-	-
Unigene0001153	319	6	1.0206	2	0.3004	gi|15220283|ref|NP_175198.1|	220	7e-57	Lysine histidine transporter-like 8 [Arabidopsis thaliana]	sp|Q9SX98|LHTL8_ARATH	220	2e-57	Lysine histidine transporter-like 8 OS=Arabidopsis thaliana GN=AATL1 PE=1 SV=1	--	--	--	--	--	--	--	--	--	--	-	GO:0005275//amine transmembrane transporter activity	GO:0031224//intrinsic to membrane
Unigene0001154	238	4	0.9119	0	0	--	--	--	--	--	--	--	--	--	--	--	--	--	--	--	--	--	--	-	-	-
Unigene0001155	215	4	1.0095	0	0	--	--	--	--	--	--	--	--	--	--	--	--	--	--	--	--	--	--	-	-	-
Unigene0001156	232	5	1.1694	0	0	--	--	--	--	--	--	--	--	--	--	--	--	--	--	--	--	--	--	-	-	-
Unigene0001157	206	4	1.0536	0	0	--	--	--	--	--	--	--	--	--	--	--	--	--	--	--	--	--	--	-	-	-
Unigene0001158	272	10	1.9949	9	1.5856	--	--	--	--	--	--	--	--	--	--	--	--	--	--	--	--	--	--	-	-	-
Unigene0001159	247	6	1.3181	4	0.776	--	--	--	--	--	--	--	--	--	--	--	--	--	--	--	--	--	--	-	-	-
Unigene0001160	428	7	0.8874	0	0	--	--	--	--	--	--	--	--	--	--	--	--	--	--	--	--	--	--	-	-	-
Unigene0001161	400	9	1.2209	2	0.2396	--	--	--	--	--	--	--	--	--	--	--	--	--	--	--	--	--	--	-	-	-
Unigene0001162	232	5	1.1694	0	0	--	--	--	--	--	--	--	--	--	--	--	--	--	--	--	--	--	--	-	-	-
Unigene0001163	333	5	0.8147	2	0.2878	--	--	--	--	--	--	--	--	--	--	--	--	--	--	--	--	--	--	-	-	-
Unigene0001164	209	4	1.0385	0	0	gi|508773683|gb|EOY20939.1|	102	3e-21	Duplicated homeodomain-like superfamily protein [Theobroma cacao]	sp|Q8S9H7|DIV_ANTMA	67	4e-11	Transcription factor DIVARICATA OS=Antirrhinum majus GN=DIVARICATA PE=2 SV=1	--	--	--	--	--	--	--	--	--	--	GO:0009725//response to hormone stimulus;GO:0006970//response to osmotic stress;GO:0010038//response to metal ion	GO:0003676//nucleic acid binding;GO:0001071//nucleic acid binding transcription factor activity	-
Unigene0001165	207	2	0.5243	0	0	--	--	--	--	--	--	--	--	--	--	--	--	--	--	--	--	--	--	-	-	-
Unigene0001166	206	4	1.0536	0	0	--	--	--	--	--	--	--	--	--	--	--	--	--	--	--	--	--	--	-	-	-
Unigene0001167	441	11	1.3534	2	0.2173	--	--	--	--	--	--	--	--	--	--	--	--	--	--	--	--	--	--	-	-	-
Unigene0001168	263	5	1.0316	2	0.3644	gi|508706571|gb|EOX98467.1|	168	3e-41	Glycosyl hydrolase family protein [Theobroma cacao]	sp|Q9LJN4|BXL5_ARATH	164	2e-40	Probable beta-D-xylosidase 5 OS=Arabidopsis thaliana GN=BXL5 PE=2 SV=2	XF0845	86.7	1e-17	COG1472	Beta-glucosidase-related glycosidases	--	--	--	--	--	GO:0045491	GO:0015926//glucosidase activity	GO:0005576//extracellular region;GO:0030312//external encapsulating structure
Unigene0001169	303	8	1.4326	4	0.6326	gi|357478237|ref|XP_003609404.1|	120	1e-26	Telomere-associated protein RIF1 [Medicago truncatula]	--	--	--	--	--	--	--	--	--	K11138	1e-32	137	vvi:100262751	telomere-associated protein RIF1	-	-	-
Unigene0001170	246	6	1.3234	1	0.1948	--	--	--	--	--	--	--	--	--	--	--	--	--	--	--	--	--	--	-	-	-
Unigene0001171	457	10	1.1873	1	0.1049	--	--	--	--	--	--	--	--	--	--	--	--	--	--	--	--	--	--	-	-	-
Unigene0001172	246	5	1.1028	0	0	gi|508776922|gb|EOY24178.1|	115	4e-25	TRNA/rRNA methyltransferase family protein isoform 2 [Theobroma cacao]	--	--	--	--	--	--	--	--	--	--	--	--	--	--	GO:0016070//RNA metabolic process	GO:0003676//nucleic acid binding;GO:0008168//methyltransferase activity	-
Unigene0001173	209	4	1.0385	2	0.4586	gi|508776922|gb|EOY24178.1|	112	3e-24	TRNA/rRNA methyltransferase family protein isoform 2 [Theobroma cacao]	--	--	--	--	--	--	--	--	--	--	--	--	--	--	GO:0009451//RNA modification	GO:0003676//nucleic acid binding;GO:0008168//methyltransferase activity	-
Unigene0001174	441	12	1.4765	8	0.8693	gi|462416528|gb|EMJ21265.1|	69.3	2e-11	hypothetical protein PRUPE_ppa025332mg [Prunus persica]	--	--	--	--	--	--	--	--	--	--	--	--	--	--	-	-	-
Unigene0001175	302	4	0.7187	0	0	--	--	--	--	--	--	--	--	--	--	--	--	--	--	--	--	--	--	-	-	-
Unigene0001176	560	12	1.1627	1	0.0856	--	--	--	--	--	--	--	--	--	--	--	--	--	--	--	--	--	--	-	-	-
Unigene0001177	205	2	0.5294	3	0.7013	gi|508718821|gb|EOY10718.1|	113	1e-24	Tryptophan/tyrosine permease [Theobroma cacao]	--	--	--	--	--	--	--	--	--	--	--	--	--	--	GO:0015837//amine transport	-	GO:0043231//intracellular membrane-bounded organelle
Unigene0001178	470	10	1.1545	5	0.5098	gi|508718821|gb|EOY10718.1|	258	4e-68	Tryptophan/tyrosine permease [Theobroma cacao]	--	--	--	--	--	--	--	--	--	--	--	--	--	--	GO:0015837//amine transport	-	GO:0043231//intracellular membrane-bounded organelle
Unigene0001179	207	4	1.0485	1	0.2315	--	--	--	--	--	--	--	--	--	--	--	--	--	--	--	--	--	--	-	-	-
Unigene0001180	212	3	0.7678	3	0.6781	gi|470114203|ref|XP_004293306.1|	127	1e-28	PREDICTED: peroxisomal membrane protein PMP22-like [Fragaria vesca subsp. vesca]	sp|Q9ZS51|PMP22_ARATH	95.5	9e-20	Peroxisomal membrane protein PMP22 OS=Arabidopsis thaliana GN=PMP22 PE=1 SV=1	--	--	--	--	--	--	--	--	--	--	-	-	GO:0044439;GO:0031224//intrinsic to membrane
Unigene0001181	219	4	0.9911	3	0.6565	gi|508781493|gb|EOY28749.1|	56.6	2e-07	Peroxisomal membrane 22 kDa family protein isoform 2 [Theobroma cacao]	--	--	--	--	--	--	--	--	--	--	--	--	--	--	-	-	-
Unigene0001182	316	6	1.0303	0	0	gi|87240897|gb|ABD32755.1|	87.4	9e-17	gag-pol polyprotein-related [Medicago truncatula]	--	--	--	--	--	--	--	--	--	--	--	--	--	--	GO:0006259//DNA metabolic process	GO:0003676//nucleic acid binding	-
Unigene0001183	203	4	1.0692	3	0.7082	--	--	--	--	--	--	--	--	--	--	--	--	--	--	--	--	--	--	-	-	-
Unigene0001184	267	9	1.829	1	0.1795	--	--	--	--	--	--	--	--	--	--	--	--	--	--	--	--	--	--	-	-	-
Unigene0001185	240	2	0.4522	1	0.1997	--	--	--	--	--	--	--	--	--	--	--	--	--	--	--	--	--	--	-	-	-
Unigene0001186	492	9	0.9926	5	0.487	gi|508704428|gb|EOX96324.1|	122	4e-27	Nucleotidyltransferase family protein isoform 11 [Theobroma cacao]	--	--	--	--	--	--	--	--	--	--	--	--	--	--	-	-	-
Unigene0001187	212	6	1.5357	3	0.6781	--	--	--	--	--	--	--	--	--	--	--	--	--	--	--	--	--	--	-	-	-
Unigene0001188	266	5	1.0199	1	0.1802	--	--	--	--	--	--	--	--	--	--	--	--	--	--	--	--	--	--	-	-	-
Unigene0001189	223	3	0.73	0	0	--	--	--	--	--	--	--	--	--	--	--	--	--	--	--	--	--	--	-	-	-
Unigene0001190	205	3	0.7941	0	0	gi|159489988|ref|XP_001702971.1|	80.9	8e-15	enolase [Chlamydomonas reinhardtii]	sp|Q7RV85|ENO_NEUCR	124	1e-28	Enolase OS=Neurospora crassa (strain ATCC 24698 / 74-OR23-1A / CBS 708.71 / DSM 1257 / FGSC 987) GN=NCU10042 PE=3 SV=1	YHR174w	85.9	2e-17	COG0148	Enolase	K01689	2e-15	80.9	cre:CHLREDRAFT_83064	enolase [EC:4.2.1.11]	GO:0009987//cellular process	GO:0016829//lyase activity	GO:0043231//intracellular membrane-bounded organelle
Unigene0001191	381	9	1.2817	1	0.1258	--	--	--	--	--	--	--	--	--	--	--	--	--	--	--	--	--	--	-	-	-
Unigene0001192	279	5	0.9724	2	0.3435	--	--	--	--	--	--	--	--	--	--	--	--	--	--	--	--	--	--	-	-	-
Unigene0001193	574	14	1.3234	0	0	gi|508727042|gb|EOY18939.1|	289	2e-77	Phosphorylase superfamily protein [Theobroma cacao]	sp|Q07469|BSPA_POPDE	109	1e-23	Bark storage protein A OS=Populus deltoides GN=BSPA PE=2 SV=1	CC2266	89.4	4e-18	COG0775	Nucleoside phosphorylase	--	--	--	--	--	GO:0006950//response to stress;GO:0055086//nucleobase-containing small molecule metabolic process	-	GO:0005618//cell wall
Unigene0001194	251	2	0.4324	1	0.1909	--	--	--	--	--	--	--	--	--	--	--	--	--	--	--	--	--	--	-	-	-
Unigene0001195	241	6	1.3509	3	0.5965	--	--	--	--	--	--	--	--	--	--	--	--	--	--	--	--	--	--	-	-	-
Unigene0001196	257	3	0.6334	4	0.7459	--	--	--	--	--	--	--	--	--	--	--	--	--	--	--	--	--	--	-	-	-
Unigene0001197	262	7	1.4497	3	0.5487	gi|449520323|ref|XP_004167183.1|	67	1e-10	PREDICTED: pentatricopeptide repeat-containing protein At3g22470, mitochondrial-like [Cucumis sativus]	--	--	--	--	--	--	--	--	--	--	--	--	--	--	-	-	-
Unigene0001198	218	4	0.9956	1	0.2198	--	--	--	--	--	--	--	--	--	--	--	--	--	--	--	--	--	--	-	-	-
Unigene0001199	216	1	0.2512	4	0.8874	--	--	--	--	--	--	--	--	--	--	--	--	--	--	--	--	--	--	-	-	-
Unigene0001200	210	3	0.7751	0	0	gi|225431571|ref|XP_002276322.1|	107	1e-22	PREDICTED: G-type lectin S-receptor-like serine/threonine-protein kinase RLK1-like [Vitis vinifera]	sp|Q39202|RLK1_ARATH	53.5	4e-07	G-type lectin S-receptor-like serine/threonine-protein kinase RLK1 OS=Arabidopsis thaliana GN=RLK1 PE=2 SV=2	--	--	--	--	--	--	--	--	--	--	GO:0006464//protein modification process;GO:0008037//cell recognition	GO:0030246//carbohydrate binding;GO:0004672//protein kinase activity;GO:0032559	-
Unigene0001201	229	6	1.4217	0	0	--	--	--	--	--	--	--	--	--	--	--	--	--	--	--	--	--	--	-	-	-
Unigene0001202	450	14	1.6881	3	0.3195	gi|449520367|ref|XP_004167205.1|	254	3e-67	PREDICTED: LOW QUALITY PROTEIN: uncharacterized LOC101212159 [Cucumis sativus]	--	--	--	--	--	--	--	--	--	--	--	--	--	--	-	GO:0005488//binding	GO:0043231//intracellular membrane-bounded organelle
Unigene0001203	209	3	0.7789	0	0	--	--	--	--	--	--	--	--	--	--	--	--	--	--	--	--	--	--	-	-	-
Unigene0001204	289	5	0.9388	3	0.4974	gi|460373049|ref|XP_004232335.1|	56.6	2e-07	PREDICTED: probable serine/threonine-protein kinase At1g18390-like [Solanum lycopersicum]	--	--	--	--	--	--	--	--	--	--	--	--	--	--	-	-	-
Unigene0001205	229	6	1.4217	1	0.2093	--	--	--	--	--	--	--	--	--	--	--	--	--	--	--	--	--	--	-	-	-
Unigene0001206	260	4	0.8348	4	0.7372	--	--	--	--	--	--	--	--	--	--	--	--	--	--	--	--	--	--	-	-	-
Unigene0001207	208	4	1.0435	1	0.2304	gi|357515045|ref|XP_003627811.1|	91.7	5e-18	Disease resistance protein RPM1 [Medicago truncatula]	sp|Q7XBQ9|RGA2_SOLBU	64.7	2e-10	Disease resistance protein RGA2 OS=Solanum bulbocastanum GN=RGA2 PE=1 SV=1	--	--	--	--	--	--	--	--	--	--	GO:0006950//response to stress	GO:0016791//phosphatase activity;GO:0032559	-
Unigene0001208	278	5	0.9759	0	0	gi|224011978|ref|XP_002294642.1|	101	5e-21	peroxidase/catalase [Thalassiosira pseudonana CCMP1335]	sp|A1DAL6|KATG_NEOFI	150	3e-36	Catalase-peroxidase OS=Neosartorya fischeri (strain ATCC 1020 / DSM 3700 / FGSC A1164 / NRRL 181) GN=katG PE=3 SV=1	XF2232	130	6e-31	COG0376	Catalase (peroxidase I)	K03782	1e-29	127	zma:100382662	catalase/peroxidase [EC:1.11.1.6 1.11.1.7]	GO:0008152//metabolic process;GO:0006950//response to stress	GO:0005506//iron ion binding;GO:0004601//peroxidase activity	-
Unigene0001209	244	4	0.8895	2	0.3928	gi|356511243|ref|XP_003524336.1|	152	2e-36	PREDICTED: potassium channel SKOR-like [Glycine max]	sp|Q9M8S6|SKOR_ARATH	147	2e-35	Potassium channel SKOR OS=Arabidopsis thaliana GN=SKOR PE=1 SV=1	--	--	--	--	--	--	--	--	--	--	GO:0009725//response to hormone stimulus;GO:0006950//response to stress;GO:0030001//metal ion transport	GO:0005249//voltage-gated potassium channel activity;GO:0004620//phospholipase activity	GO:0043231//intracellular membrane-bounded organelle;GO:0031224//intrinsic to membrane
Unigene0001210	456	11	1.3089	1	0.1051	--	--	--	--	--	--	--	--	--	--	--	--	--	--	--	--	--	--	-	-	-
Unigene0001211	204	2	0.532	0	0	--	--	--	--	--	--	--	--	--	--	--	--	--	--	--	--	--	--	-	-	-
Unigene0001212	270	5	1.0048	0	0	--	--	--	--	--	--	--	--	--	--	--	--	--	--	--	--	--	--	-	-	-
Unigene0001213	211	4	1.0286	1	0.2271	gi|508780207|gb|EOY27463.1|	107	1e-22	Potassium transporter 1 isoform 4 [Theobroma cacao]	sp|O22397|POT1_ARATH	97.4	2e-20	Potassium transporter 1 OS=Arabidopsis thaliana GN=POT1 PE=1 SV=2	--	--	--	--	--	K03549	9e-24	108	pop:POPTR_208054	KUP system potassium uptake protein	GO:0050896//response to stimulus;GO:0034220//ion transmembrane transport;GO:0009826//unidimensional cell growth	GO:0046873//metal ion transmembrane transporter activity	GO:0016020//membrane
Unigene0001214	222	5	1.2221	1	0.2159	gi|470115800|ref|XP_004294079.1|	126	2e-28	PREDICTED: probable potassium transporter 13-like [Fragaria vesca subsp. vesca]	sp|Q8H3P9|HAK7_ORYSJ	108	1e-23	Potassium transporter 7 OS=Oryza sativa subsp. japonica GN=HAK7 PE=2 SV=3	RSc1621	65.9	2e-11	COG3158	K+ transporter	K03549	7e-27	118	rcu:RCOM_1575520	KUP system potassium uptake protein	GO:0034220//ion transmembrane transport	GO:0046873//metal ion transmembrane transporter activity	-
Unigene0001215	240	5	1.1304	2	0.3993	gi|225445990|ref|XP_002267344.1|	101	5e-21	PREDICTED: RING-H2 finger protein ATL43-like [Vitis vinifera]	sp|Q5EAE9|ATL43_ARATH	78.6	1e-14	RING-H2 finger protein ATL43 OS=Arabidopsis thaliana GN=ATL43 PE=2 SV=2	--	--	--	--	--	--	--	--	--	--	-	GO:0046914//transition metal ion binding	-
Unigene0001216	408	9	1.1969	3	0.3524	--	--	--	--	--	--	--	--	--	--	--	--	--	--	--	--	--	--	-	-	-
Unigene0001217	218	3	0.7467	0	0	--	--	--	--	--	--	--	--	--	--	--	--	--	--	--	--	--	--	-	-	-
Unigene0001218	236	5	1.1496	1	0.2031	--	--	--	--	--	--	--	--	--	--	--	--	--	--	--	--	--	--	-	-	-
Unigene0001219	349	5	0.7774	1	0.1373	--	--	--	--	--	--	--	--	--	--	--	--	--	--	--	--	--	--	-	-	-
Unigene0001220	242	9	2.0179	2	0.396	--	--	--	--	--	--	--	--	--	--	--	--	--	--	--	--	--	--	-	-	-
Unigene0001221	254	7	1.4954	6	1.132	--	--	--	--	--	--	--	--	--	--	--	--	--	--	--	--	--	--	-	-	-
Unigene0001222	789	14	0.9628	1	0.0607	--	--	--	--	--	--	--	--	--	--	--	--	--	--	--	--	--	--	-	-	-
Unigene0001223	211	5	1.2858	5	1.1356	--	--	--	--	--	--	--	--	--	--	--	--	--	--	--	--	--	--	-	-	-
Unigene0001224	333	7	1.1406	0	0	gi|9280691|gb|AAF86560.1|AC069252_19	86.7	1e-16	F2E2.13 [Arabidopsis thaliana]	--	--	--	--	--	--	--	--	--	--	--	--	--	--	-	-	-
Unigene0001225	301	6	1.0816	1	0.1592	gi|508783378|gb|EOY30634.1|	164	4e-40	Iq-domain 31 [Theobroma cacao]	sp|Q8L4D8|IQD31_ARATH	70.9	2e-12	Protein IQ-DOMAIN 31 OS=Arabidopsis thaliana GN=IQD31 PE=1 SV=1	--	--	--	--	--	--	--	--	--	--	-	-	-
Unigene0001226	263	4	0.8253	0	0	--	--	--	--	--	--	--	--	--	--	--	--	--	--	--	--	--	--	-	-	-
Unigene0001227	275	5	0.9865	4	0.697	--	--	--	--	--	--	--	--	--	--	--	--	--	--	--	--	--	--	-	-	-
Unigene0001228	201	3	0.8099	0	0	gi|295424093|ref|NP_001171337.1|	83.6	1e-15	transcription factor BTF3b [Zea mays]	sp|Q5M8V0|BT3L4_XENTR	90.5	3e-18	Transcription factor BTF3 homolog 4 OS=Xenopus tropicalis GN=btf3l4 PE=2 SV=1	--	--	--	--	--	K01527	2e-16	83.6	zma:100422791	nascent polypeptide-associated complex subunit beta	GO:0006970//response to osmotic stress	-	-
Unigene0001229	386	9	1.2651	8	0.9932	--	--	--	--	--	--	--	--	--	--	--	--	--	--	--	--	--	--	-	-	-
Unigene0001230	270	8	1.6077	2	0.355	gi|9294245|dbj|BAB02147.1|	148	4e-35	TNP2-like transposon protein-like [Arabidopsis thaliana]	--	--	--	--	--	--	--	--	--	--	--	--	--	--	GO:0019538//protein metabolic process;GO:0006644//phospholipid metabolic process	GO:0046914//transition metal ion binding;GO:0016831//carboxy-lyase activity;GO:0070011	GO:0044464//cell part
Unigene0001231	388	8	1.1188	3	0.3705	gi|9294245|dbj|BAB02147.1|	64.7	6e-10	TNP2-like transposon protein-like [Arabidopsis thaliana]	--	--	--	--	--	--	--	--	--	--	--	--	--	--	-	-	-
Unigene0001232	210	4	1.0335	0	0	--	--	--	--	--	--	--	--	--	--	--	--	--	--	--	--	--	--	-	-	-
Unigene0001233	263	6	1.2379	2	0.3644	--	--	--	--	--	--	--	--	--	--	--	--	--	--	--	--	--	--	-	-	-
Unigene0001234	292	8	1.4866	1	0.1641	--	--	--	--	--	--	--	--	--	--	--	--	--	--	--	--	--	--	-	-	-
Unigene0001235	259	6	1.257	4	0.7401	gi|224142882|ref|XP_002324763.1|	101	6e-21	potassium efflux antiporter [Populus trichocarpa]	sp|Q9ZUN3|KEA4_ARATH	92.8	6e-19	K(+) efflux antiporter 4 OS=Arabidopsis thaliana GN=KEA4 PE=2 SV=2	--	--	--	--	--	--	--	--	--	--	GO:0006811//ion transport	GO:0015078//hydrogen ion transmembrane transporter activity	GO:0031224//intrinsic to membrane
Unigene0001236	242	5	1.1211	0	0	gi|449490509|ref|XP_004158626.1|	112	3e-24	PREDICTED: uncharacterized LOC101211501 [Cucumis sativus]	--	--	--	--	--	--	--	--	--	--	--	--	--	--	-	-	-
Unigene0001237	213	3	0.7642	2	0.45	--	--	--	--	--	--	--	--	--	--	--	--	--	--	--	--	--	--	-	-	-
Unigene0001238	436	11	1.3689	2	0.2198	--	--	--	--	--	--	--	--	--	--	--	--	--	--	--	--	--	--	-	-	-
Unigene0001239	315	6	1.0335	3	0.4564	--	--	--	--	--	--	--	--	--	--	--	--	--	--	--	--	--	--	-	-	-
Unigene0001240	224	3	0.7267	0	0	--	--	--	--	--	--	--	--	--	--	--	--	--	--	--	--	--	--	-	-	-
Unigene0001241	202	4	1.0745	1	0.2372	--	--	--	--	--	--	--	--	--	--	--	--	--	--	--	--	--	--	-	-	-
Unigene0001242	223	3	0.73	1	0.2149	--	--	--	--	--	--	--	--	--	--	--	--	--	--	--	--	--	--	-	-	-
Unigene0001243	355	9	1.3756	2	0.27	gi|359497021|ref|XP_002265622.2|	209	2e-53	PREDICTED: zeaxanthin epoxidase, chloroplastic-like [Vitis vinifera]	sp|Q9F131|3HBH1_PSEAC	52.4	9e-07	3-hydroxybenzoate 6-hydroxylase 1 OS=Pseudomonas alcaligenes GN=xlnD PE=1 SV=1	SMc02891	53.9	7e-08	COG0654	2-polyprenyl-6-methoxyphenol hydroxylase and related FAD-dependent oxidoreductases	--	--	--	--	--	GO:0008152//metabolic process	GO:0016709//oxidoreductase activity, acting on paired donors, with incorporation or reduction of molecular oxygen, NADH or NADPH as one donor, and incorporation of one atom of oxygen	-
Unigene0001244	220	2	0.4933	2	0.4356	--	--	--	--	--	--	--	--	--	--	--	--	--	--	--	--	--	--	-	-	-
Unigene0001245	259	6	1.257	1	0.185	--	--	--	--	--	--	--	--	--	--	--	--	--	--	--	--	--	--	-	-	-
Unigene0001246	335	7	1.1338	0	0	gi|508712516|gb|EOY04413.1|	132	2e-30	Leucine-rich repeat protein kinase family protein isoform 1 [Theobroma cacao]	sp|Q9C9Y8|Y3868_ARATH	111	2e-24	Probable inactive receptor kinase At3g08680 OS=Arabidopsis thaliana GN=At3g08680 PE=1 SV=1	--	--	--	--	--	--	--	--	--	--	GO:0006796//phosphate-containing compound metabolic process	GO:0004672//protein kinase activity;GO:0000166//nucleotide binding	GO:0016020//membrane;GO:0071944//cell periphery
Unigene0001247	262	6	1.2426	0	0	--	--	--	--	--	--	--	--	--	--	--	--	--	--	--	--	--	--	-	-	-
Unigene0001248	227	3	0.7171	2	0.4222	gi|225423589|ref|XP_002275605.1|	117	8e-26	PREDICTED: pentatricopeptide repeat-containing protein At4g20090-like [Vitis vinifera]	sp|O49436|PP327_ARATH	105	1e-22	Pentatricopeptide repeat-containing protein At4g20090 OS=Arabidopsis thaliana GN=EMB1025 PE=3 SV=1	--	--	--	--	--	--	--	--	--	--	GO:0003006//developmental process involved in reproduction	-	-
Unigene0001249	255	5	1.0639	1	0.1879	--	--	--	--	--	--	--	--	--	--	--	--	--	--	--	--	--	--	-	-	-
Unigene0001250	381	12	1.709	0	0	--	--	--	--	--	--	--	--	--	--	--	--	--	--	--	--	--	--	-	-	-
Unigene0001251	211	3	0.7715	2	0.4542	--	--	--	--	--	--	--	--	--	--	--	--	--	--	--	--	--	--	-	-	-
Unigene0001252	368	4	0.5898	0	0	gi|359484818|ref|XP_003633169.1|	92	4e-18	PREDICTED: autophagy-related protein 18-like [Vitis vinifera]	sp|Q8H1Q8|AT18B_ARATH	86.3	6e-17	Autophagy-related protein 18b OS=Arabidopsis thaliana GN=ATG18B PE=2 SV=2	--	--	--	--	--	--	--	--	--	--	-	-	-
Unigene0001253	736	0	0	0	0	gi|359484818|ref|XP_003633169.1|	208	1e-52	PREDICTED: autophagy-related protein 18-like [Vitis vinifera]	sp|Q8H1Q8|AT18B_ARATH	190	8e-48	Autophagy-related protein 18b OS=Arabidopsis thaliana GN=ATG18B PE=2 SV=2	--	--	--	--	--	--	--	--	--	--	-	-	-
Unigene0001254	503	0	0	0	0	gi|508784279|gb|EOY31535.1|	181	6e-45	Autophagy 18 B isoform 3 [Theobroma cacao]	sp|Q8H1Q8|AT18B_ARATH	166	5e-41	Autophagy-related protein 18b OS=Arabidopsis thaliana GN=ATG18B PE=2 SV=2	--	--	--	--	--	--	--	--	--	--	-	-	-
Unigene0001255	1405	0	0	0	0	gi|508784277|gb|EOY31533.1|	491	1e-137	Autophagy 18 B isoform 1 [Theobroma cacao]	sp|Q8H1Q8|AT18B_ARATH	471	8e-132	Autophagy-related protein 18b OS=Arabidopsis thaliana GN=ATG18B PE=2 SV=2	--	--	--	--	--	--	--	--	--	--	-	-	-
Unigene0001256	1520	0	0	0	0	gi|508784277|gb|EOY31533.1|	561	1e-158	Autophagy 18 B isoform 1 [Theobroma cacao]	sp|Q8H1Q8|AT18B_ARATH	533	1e-150	Autophagy-related protein 18b OS=Arabidopsis thaliana GN=ATG18B PE=2 SV=2	--	--	--	--	--	--	--	--	--	--	-	-	-
Unigene0001257	1585	0	0	0	0	gi|508784277|gb|EOY31533.1|	290	1e-153	Autophagy 18 B isoform 1 [Theobroma cacao]	sp|Q8H1Q8|AT18B_ARATH	286	1e-145	Autophagy-related protein 18b OS=Arabidopsis thaliana GN=ATG18B PE=2 SV=2	--	--	--	--	--	--	--	--	--	--	-	-	-
Unigene0001258	483	0	0	0	0	gi|508784279|gb|EOY31535.1|	159	2e-38	Autophagy 18 B isoform 3 [Theobroma cacao]	sp|Q8H1Q8|AT18B_ARATH	149	1e-35	Autophagy-related protein 18b OS=Arabidopsis thaliana GN=ATG18B PE=2 SV=2	--	--	--	--	--	--	--	--	--	--	-	-	-
Unigene0001259	506	2	0.2145	0	0	gi|508784279|gb|EOY31535.1|	124	1e-27	Autophagy 18 B isoform 3 [Theobroma cacao]	sp|Q8H1Q8|AT18B_ARATH	110	4e-24	Autophagy-related protein 18b OS=Arabidopsis thaliana GN=ATG18B PE=2 SV=2	--	--	--	--	--	--	--	--	--	--	-	-	-
Unigene0001260	851	0	0	0	0	gi|508784279|gb|EOY31535.1|	277	3e-73	Autophagy 18 B isoform 3 [Theobroma cacao]	sp|Q8H1Q8|AT18B_ARATH	253	1e-66	Autophagy-related protein 18b OS=Arabidopsis thaliana GN=ATG18B PE=2 SV=2	--	--	--	--	--	--	--	--	--	--	-	-	-
Unigene0001261	1853	0	0	0	0	gi|508784277|gb|EOY31533.1|	290	1e-132	Autophagy 18 B isoform 1 [Theobroma cacao]	sp|Q8H1Q8|AT18B_ARATH	286	1e-126	Autophagy-related protein 18b OS=Arabidopsis thaliana GN=ATG18B PE=2 SV=2	--	--	--	--	--	--	--	--	--	--	-	-	-
Unigene0001262	1968	0	0	0	0	gi|508784277|gb|EOY31533.1|	290	1e-153	Autophagy 18 B isoform 1 [Theobroma cacao]	sp|Q8H1Q8|AT18B_ARATH	286	2e-145	Autophagy-related protein 18b OS=Arabidopsis thaliana GN=ATG18B PE=2 SV=2	--	--	--	--	--	--	--	--	--	--	-	-	-
Unigene0001263	1903	0	0	0	0	gi|508784277|gb|EOY31533.1|	561	1e-158	Autophagy 18 B isoform 1 [Theobroma cacao]	sp|Q8H1Q8|AT18B_ARATH	533	1e-150	Autophagy-related protein 18b OS=Arabidopsis thaliana GN=ATG18B PE=2 SV=2	--	--	--	--	--	--	--	--	--	--	-	-	-
Unigene0001264	1788	0	0	0	0	gi|508784277|gb|EOY31533.1|	491	1e-137	Autophagy 18 B isoform 1 [Theobroma cacao]	sp|Q8H1Q8|AT18B_ARATH	471	1e-131	Autophagy-related protein 18b OS=Arabidopsis thaliana GN=ATG18B PE=2 SV=2	--	--	--	--	--	--	--	--	--	--	-	-	-
Unigene0001265	1470	0	0	0	0	gi|508784277|gb|EOY31533.1|	290	1e-132	Autophagy 18 B isoform 1 [Theobroma cacao]	sp|Q8H1Q8|AT18B_ARATH	286	9e-127	Autophagy-related protein 18b OS=Arabidopsis thaliana GN=ATG18B PE=2 SV=2	--	--	--	--	--	--	--	--	--	--	-	-	-
Unigene0001266	376	4	0.5772	1	0.1274	gi|449469901|ref|XP_004152657.1|	93.6	1e-18	PREDICTED: protein BASIC PENTACYSTEINE6-like [Cucumis sativus]	sp|Q8L999|BPC6_ARATH	84.7	2e-16	Protein BASIC PENTACYSTEINE6 OS=Arabidopsis thaliana GN=BPC6 PE=1 SV=1	--	--	--	--	--	--	--	--	--	--	GO:0009725//response to hormone stimulus;GO:0010468//regulation of gene expression;GO:0032774	GO:0042802//identical protein binding;GO:0001071//nucleic acid binding transcription factor activity	GO:0043231//intracellular membrane-bounded organelle;GO:0043232
Unigene0001267	363	9	1.3453	4	0.5281	--	--	--	--	--	--	--	--	--	--	--	--	--	--	--	--	--	--	-	-	-
Unigene0001268	2345	8	0.1851	7	0.143	gi|508781539|gb|EOY28795.1|	937	0	STRUBBELIG-receptor family 8 isoform 1 [Theobroma cacao]	sp|Q6R2J8|SRF8_ARATH	855	0	Protein STRUBBELIG-RECEPTOR FAMILY 8 OS=Arabidopsis thaliana GN=SRF8 PE=2 SV=1	slr0152	83.2	2e-15	COG0515	Serine/threonine protein kinase	--	--	--	--	--	GO:0006464//protein modification process;GO:0006796//phosphate-containing compound metabolic process	GO:0004674//protein serine/threonine kinase activity;GO:0032559	GO:0031224//intrinsic to membrane
Unigene0001269	3590	0	0	0	0	gi|149789414|gb|ABR29878.1|	1778	0	phosphoenolpyruvate carboxylase [Ricinus communis]	sp|Q02909|CAPP1_SOYBN	1712	0	Phosphoenolpyruvate carboxylase, housekeeping isozyme OS=Glycine max GN=PPC16 PE=1 SV=1	PA3687	655	0	COG2352	Phosphoenolpyruvate carboxylase	K01595	0	1788	rcu:RCOM_1177170	phosphoenolpyruvate carboxylase [EC:4.1.1.31]	GO:0071704;GO:0046356//acetyl-CoA catabolic process	GO:0004611//phosphoenolpyruvate carboxykinase activity;GO:0016628//oxidoreductase activity, acting on the CH-CH group of donors, NAD or NADP as acceptor	GO:0005576//extracellular region;GO:0016020//membrane;GO:0009536//plastid
Unigene0001270	3590	0	0	0	0	gi|508721356|gb|EOY13253.1|	1792	0	Phosphoenolpyruvate carboxylase 3 isoform 1 [Theobroma cacao]	sp|Q9FV65|CAPPC_FLATR	1753	0	Phosphoenolpyruvate carboxylase 2 OS=Flaveria trinervia GN=PPCC PE=1 SV=1	HI1636	665	0	COG2352	Phosphoenolpyruvate carboxylase	K01595	0	1796	rcu:RCOM_1177170	phosphoenolpyruvate carboxylase [EC:4.1.1.31]	GO:0071704;GO:0046356//acetyl-CoA catabolic process	GO:0004611//phosphoenolpyruvate carboxykinase activity;GO:0016628//oxidoreductase activity, acting on the CH-CH group of donors, NAD or NADP as acceptor	GO:0005576//extracellular region;GO:0016020//membrane;GO:0009536//plastid
Unigene0001271	3417	0	0	0	0	gi|149789414|gb|ABR29878.1|	1780	0	phosphoenolpyruvate carboxylase [Ricinus communis]	sp|Q02909|CAPP1_SOYBN	1727	0	Phosphoenolpyruvate carboxylase, housekeeping isozyme OS=Glycine max GN=PPC16 PE=1 SV=1	PA3687	657	0	COG2352	Phosphoenolpyruvate carboxylase	K01595	0	1790	rcu:RCOM_1177170	phosphoenolpyruvate carboxylase [EC:4.1.1.31]	GO:0071704;GO:0046356//acetyl-CoA catabolic process	GO:0004611//phosphoenolpyruvate carboxykinase activity;GO:0016628//oxidoreductase activity, acting on the CH-CH group of donors, NAD or NADP as acceptor	GO:0005576//extracellular region;GO:0016020//membrane;GO:0009536//plastid
Unigene0001272	3627	0	0	0	0	gi|149789414|gb|ABR29878.1|	1766	0	phosphoenolpyruvate carboxylase [Ricinus communis]	sp|Q02909|CAPP1_SOYBN	1717	0	Phosphoenolpyruvate carboxylase, housekeeping isozyme OS=Glycine max GN=PPC16 PE=1 SV=1	PA3687	659	0	COG2352	Phosphoenolpyruvate carboxylase	K01595	0	1776	rcu:RCOM_1177170	phosphoenolpyruvate carboxylase [EC:4.1.1.31]	GO:0071704;GO:0046356//acetyl-CoA catabolic process	GO:0004611//phosphoenolpyruvate carboxykinase activity;GO:0016628//oxidoreductase activity, acting on the CH-CH group of donors, NAD or NADP as acceptor	GO:0005576//extracellular region;GO:0016020//membrane;GO:0009536//plastid
Unigene0001273	3627	0	0	0	0	gi|149789409|gb|ABR29876.1|	1797	0	phosphoenolpyruvate carboxylase [Ricinus communis]	sp|Q9FV65|CAPPC_FLATR	1753	0	Phosphoenolpyruvate carboxylase 2 OS=Flaveria trinervia GN=PPCC PE=1 SV=1	PA3687	664	0	COG2352	Phosphoenolpyruvate carboxylase	K01595	0	1801	rcu:RCOM_0551460	phosphoenolpyruvate carboxylase [EC:4.1.1.31]	GO:0071704;GO:0046356//acetyl-CoA catabolic process	GO:0004611//phosphoenolpyruvate carboxykinase activity;GO:0016628//oxidoreductase activity, acting on the CH-CH group of donors, NAD or NADP as acceptor	GO:0005576//extracellular region;GO:0016020//membrane;GO:0009536//plastid
Unigene0001274	3454	0	0	0	0	gi|508721356|gb|EOY13253.1|	1774	0	Phosphoenolpyruvate carboxylase 3 isoform 1 [Theobroma cacao]	sp|Q02909|CAPP1_SOYBN	1732	0	Phosphoenolpyruvate carboxylase, housekeeping isozyme OS=Glycine max GN=PPC16 PE=1 SV=1	PA3687	660	0	COG2352	Phosphoenolpyruvate carboxylase	K01595	0	1778	rcu:RCOM_1177170	phosphoenolpyruvate carboxylase [EC:4.1.1.31]	GO:0071704;GO:0046356//acetyl-CoA catabolic process	GO:0004611//phosphoenolpyruvate carboxykinase activity;GO:0016628//oxidoreductase activity, acting on the CH-CH group of donors, NAD or NADP as acceptor	GO:0005576//extracellular region;GO:0016020//membrane;GO:0009536//plastid
Unigene0001275	1750	124	3.8447	162	4.4361	gi|356551604|ref|XP_003544164.1|	614	1e-174	PREDICTED: beta-1,3-galactosyltransferase 7-like [Glycine max]	sp|Q6NQB7|B3GT7_ARATH	558	4e-158	Beta-1,3-galactosyltransferase 7 OS=Arabidopsis thaliana GN=B3GALT7 PE=2 SV=1	--	--	--	--	--	--	--	--	--	--	-	-	-
Unigene0001276	818	2	0.1327	0	0	gi|502124044|ref|XP_004498360.1|	141	4e-41	PREDICTED: transcription initiation factor TFIID subunit 9-like [Cicer arietinum]	sp|Q8VI33|TAF9_MOUSE	99.4	3e-20	Transcription initiation factor TFIID subunit 9 OS=Mus musculus GN=Taf9 PE=2 SV=1	ECU01g1330	92.4	8e-19	COG5094	Transcription initiation factor TFIID, subunit TAF9 (also component of histone acetyltransferase SAGA)	K03133	1e-40	166	rcu:RCOM_0652310	transcription initiation factor TFIID subunit 9B	GO:0032774	GO:0003676//nucleic acid binding	GO:0005667//transcription factor complex
Unigene0001277	863	79	4.967	65	3.6093	gi|508779999|gb|EOY27255.1|	167	2e-40	TATA binding protein associated factor 21kDa subunit isoform 2 [Theobroma cacao]	sp|Q8VI33|TAF9_MOUSE	99.4	3e-20	Transcription initiation factor TFIID subunit 9 OS=Mus musculus GN=Taf9 PE=2 SV=1	ECU01g1330	92.4	9e-19	COG5094	Transcription initiation factor TFIID, subunit TAF9 (also component of histone acetyltransferase SAGA)	K03133	5e-41	167	rcu:RCOM_0652310	transcription initiation factor TFIID subunit 9B	GO:0032774	GO:0003676//nucleic acid binding	GO:0005667//transcription factor complex
Unigene0001278	205	3	0.7941	2	0.4675	--	--	--	--	--	--	--	--	--	--	--	--	--	--	--	--	--	--	-	-	-
Unigene0001279	739	20	1.4685	20	1.2969	gi|508779709|gb|EOY26965.1|	387	1e-106	6-phosphofructokinase 3 [Theobroma cacao]	sp|Q94AA4|K6PF3_ARATH	363	9e-100	6-phosphofructokinase 3 OS=Arabidopsis thaliana GN=PFK3 PE=1 SV=1	BB0727	181	9e-46	COG0205	6-phosphofructokinase	K00850	6e-106	383	rcu:RCOM_1048820	6-phosphofructokinase [EC:2.7.1.11]	-	-	-
Unigene0001280	1216	70	3.1235	54	2.1281	gi|225450115|ref|XP_002278849.1|	369	1e-101	PREDICTED: nuclear transcription factor Y subunit A-1-like [Vitis vinifera]	sp|Q9LXV5|NFYA1_ARATH	169	4e-41	Nuclear transcription factor Y subunit A-1 OS=Arabidopsis thaliana GN=NFYA1 PE=2 SV=1	SPBC725.11c	92.4	1e-18	COG5224	CCAAT-binding factor, subunit B	--	--	--	--	--	GO:0010468//regulation of gene expression	GO:0003676//nucleic acid binding;GO:0001071//nucleic acid binding transcription factor activity	GO:0005667//transcription factor complex
Unigene0001281	401	5	0.6766	4	0.478	gi|225424993|ref|XP_002266979.1|	152	3e-36	PREDICTED: chlorophyll(ide) b reductase NOL, chloroplastic [Vitis vinifera]	sp|Q84ST4|NOL_ORYSJ	140	3e-33	Chlorophyll(ide) b reductase NOL, chloroplastic OS=Oryza sativa subsp. japonica GN=NOL PE=1 SV=1	--	--	--	--	--	K13606	5e-37	152	vvi:100265035	chlorophyll(ide) b reductase [EC:1.1.1.294]	GO:0006787;GO:0044257//cellular protein catabolic process	GO:0036094;GO:0016616//oxidoreductase activity, acting on the CH-OH group of donors, NAD or NADP as acceptor	GO:0009536//plastid
Unigene0001282	1575	44	1.5158	3	0.0913	gi|508720050|gb|EOY11947.1|	565	1e-159	RING/U-box domain-containing protein isoform 2 [Theobroma cacao]	sp|Q93Z92|RING4_ARATH	130	3e-29	E3 ubiquitin-protein ligase At4g11680 OS=Arabidopsis thaliana GN=At4g11680 PE=2 SV=1	--	--	--	--	--	--	--	--	--	--	-	-	-
Unigene0001283	1022	24	1.2742	14	0.6565	gi|470147195|ref|XP_004309201.1|	340	3e-92	PREDICTED: prolyl 4-hydroxylase subunit alpha-2-like [Fragaria vesca subsp. vesca]	sp|P16924|P4HA1_CHICK	63.2	3e-09	Prolyl 4-hydroxylase subunit alpha-1 OS=Gallus gallus GN=P4HA1 PE=1 SV=1	--	--	--	--	--	K00472	3e-66	251	pop:POPTR_1105096	prolyl 4-hydroxylase [EC:1.14.11.2]	-	GO:0005488//binding;GO:0016706//oxidoreductase activity, acting on paired donors, with incorporation or reduction of molecular oxygen, 2-oxoglutarate as one donor, and incorporation of one atom each of oxygen into both donors	-
Unigene0001284	633	8	0.6858	6	0.4542	--	--	--	--	--	--	--	--	--	--	--	--	--	--	--	--	--	--	-	-	-
Unigene0001285	218	19	4.7291	10	2.1982	--	--	--	--	--	--	--	--	--	--	--	--	--	--	--	--	--	--	-	-	-
Unigene0001286	1264	7	0.3005	5	0.1896	gi|225453418|ref|XP_002274749.1|	387	1e-106	PREDICTED: protein ARABIDILLO 1-like [Vitis vinifera]	sp|O22161|ADLO1_ARATH	347	8e-95	Protein ARABIDILLO 1 OS=Arabidopsis thaliana GN=FBX5 PE=1 SV=1	--	--	--	--	--	--	--	--	--	--	GO:0048528//post-embryonic root development	GO:0005488//binding	GO:0043231//intracellular membrane-bounded organelle
Unigene0001287	301	2	0.3605	2	0.3184	gi|508709702|gb|EOY01599.1|	120	1e-26	ACT domain repeat 4 [Theobroma cacao]	--	--	--	--	--	--	--	--	--	--	--	--	--	--	GO:0009725//response to hormone stimulus	GO:0031406//carboxylic acid binding	-
Unigene0001288	306	7	1.2412	1	0.1566	--	--	--	--	--	--	--	--	--	--	--	--	--	--	--	--	--	--	-	-	-
Unigene0001289	1819	190	5.6676	289	7.6136	gi|508783146|gb|EOY30402.1|	613	1e-174	Casein kinase 1-like protein 2 isoform 1 [Theobroma cacao]	sp|P42158|KC1D_ARATH	483	2e-135	Casein kinase I isoform delta-like OS=Arabidopsis thaliana GN=At4g26100 PE=2 SV=2	CT301_1	54.7	5e-07	COG0515	Serine/threonine protein kinase	K02218	2e-175	615	rcu:RCOM_1047520	casein kinase 1 [EC:2.7.11.1]	-	-	-
Unigene0001290	933	228	13.2597	165	8.4748	gi|508719909|gb|EOY11806.1|	108	2e-22	UvrABC system protein C [Theobroma cacao]	--	--	--	--	--	--	--	--	--	--	--	--	--	--	-	-	-
Unigene0001291	1223	64	2.8395	44	1.7241	gi|508719909|gb|EOY11806.1|	108	3e-22	UvrABC system protein C [Theobroma cacao]	--	--	--	--	--	--	--	--	--	--	--	--	--	--	-	-	-
Unigene0001292	383	4	0.5667	2	0.2502	gi|508724752|gb|EOY16649.1|	95.1	4e-19	V(D)J recombination-activating protein 2 isoform 3 [Theobroma cacao]	--	--	--	--	--	--	--	--	--	--	--	--	--	--	-	-	-
Unigene0001293	1313	2	0.0827	0	0	gi|508709851|gb|EOY01748.1|	389	1e-107	WRKY DNA-binding protein 57 isoform 1 [Theobroma cacao]	sp|Q9C983|WRK57_ARATH	278	7e-74	Probable WRKY transcription factor 57 OS=Arabidopsis thaliana GN=WRKY57 PE=2 SV=1	--	--	--	--	--	--	--	--	--	--	GO:0010468//regulation of gene expression	GO:0003677//DNA binding;GO:0001071//nucleic acid binding transcription factor activity	-
Unigene0001294	1061	0	0	0	0	gi|508709851|gb|EOY01748.1|	289	9e-77	WRKY DNA-binding protein 57 isoform 1 [Theobroma cacao]	sp|Q9C983|WRK57_ARATH	219	4e-56	Probable WRKY transcription factor 57 OS=Arabidopsis thaliana GN=WRKY57 PE=2 SV=1	--	--	--	--	--	--	--	--	--	--	GO:0010468//regulation of gene expression	GO:0003677//DNA binding;GO:0001071//nucleic acid binding transcription factor activity	-
Unigene0001295	1042	0	0	0	0	gi|508709851|gb|EOY01748.1|	289	9e-77	WRKY DNA-binding protein 57 isoform 1 [Theobroma cacao]	sp|Q9C983|WRK57_ARATH	219	3e-56	Probable WRKY transcription factor 57 OS=Arabidopsis thaliana GN=WRKY57 PE=2 SV=1	--	--	--	--	--	--	--	--	--	--	GO:0010468//regulation of gene expression	GO:0003677//DNA binding;GO:0001071//nucleic acid binding transcription factor activity	-
Unigene0001296	1025	53	2.8056	27	1.2623	gi|526117425|ref|NP_001268019.1|	93.6	7e-18	acyl-CoA-binding domain-containing protein 3-like precursor [Vitis vinifera]	sp|Q9STX1|ACBP3_ARATH	52.8	4e-06	Acyl-CoA-binding domain-containing protein 3 OS=Arabidopsis thaliana GN=ACBP3 PE=1 SV=1	--	--	--	--	--	--	--	--	--	--	-	-	-
Unigene0001297	1923	321	9.0575	280	6.9776	gi|356535804|ref|XP_003536433.1|	990	0	PREDICTED: eukaryotic translation initiation factor 5B-like [Glycine max]	sp|Q10251|IF2P_SCHPO	615	5e-175	Eukaryotic translation initiation factor 5B OS=Schizosaccharomyces pombe (strain 972 / ATCC 24843) GN=SPAC56F8.03 PE=1 SV=1	SPAC56F8.03	615	1e-175	COG0532	Translation initiation factor 2 (IF-2; GTPase)	K03243	0	997	vvi:100242745	translation initiation factor 5B	GO:0009207	GO:0008135//translation factor activity, nucleic acid binding;GO:0032561//guanyl ribonucleotide binding;GO:0017111//nucleoside-triphosphatase activity	-
Unigene0001298	2180	0	0	0	0	gi|508781937|gb|EOY29193.1|	1034	0	Kinase superfamily protein isoform 1 [Theobroma cacao]	sp|Q8RWG1|Y4139_ARATH	1003	0	Uncharacterized aarF domain-containing protein kinase At4g31390, chloroplastic OS=Arabidopsis thaliana GN=At4g31390 PE=1 SV=1	all0592	504	2e-142	COG0661	Predicted unusual protein kinase	K08869	0	1010	osa:4350081	aarF domain-containing kinase	GO:0006464//protein modification process	GO:0016301//kinase activity;GO:0032559	GO:0043231//intracellular membrane-bounded organelle
Unigene0001299	2462	0	0	0	0	gi|359475997|ref|XP_002280681.2|	578	1e-163	PREDICTED: uncharacterized aarF domain-containing protein kinase At4g31390, chloroplastic-like [Vitis vinifera]	sp|Q8RWG1|Y4139_ARATH	563	2e-159	Uncharacterized aarF domain-containing protein kinase At4g31390, chloroplastic OS=Arabidopsis thaliana GN=At4g31390 PE=1 SV=1	all0592	287	7e-77	COG0661	Predicted unusual protein kinase	K08869	2e-160	566	osa:4350081	aarF domain-containing kinase	-	-	-
Unigene0001300	2446	0	0	0	0	gi|508781937|gb|EOY29193.1|	829	0	Kinase superfamily protein isoform 1 [Theobroma cacao]	sp|Q8RWG1|Y4139_ARATH	815	0	Uncharacterized aarF domain-containing protein kinase At4g31390, chloroplastic OS=Arabidopsis thaliana GN=At4g31390 PE=1 SV=1	all0592	444	3e-124	COG0661	Predicted unusual protein kinase	K08869	0	819	osa:4350081	aarF domain-containing kinase	GO:0006464//protein modification process	GO:0016301//kinase activity;GO:0032559	GO:0044434//chloroplast part
Unigene0001301	2219	0	0	0	0	gi|359475997|ref|XP_002280681.2|	578	1e-163	PREDICTED: uncharacterized aarF domain-containing protein kinase At4g31390, chloroplastic-like [Vitis vinifera]	sp|Q8RWG1|Y4139_ARATH	563	2e-159	Uncharacterized aarF domain-containing protein kinase At4g31390, chloroplastic OS=Arabidopsis thaliana GN=At4g31390 PE=1 SV=1	all0592	287	6e-77	COG0661	Predicted unusual protein kinase	K08869	2e-160	566	osa:4350081	aarF domain-containing kinase	-	-	-
Unigene0001302	2203	0	0	0	0	gi|508781937|gb|EOY29193.1|	829	0	Kinase superfamily protein isoform 1 [Theobroma cacao]	sp|Q8RWG1|Y4139_ARATH	815	0	Uncharacterized aarF domain-containing protein kinase At4g31390, chloroplastic OS=Arabidopsis thaliana GN=At4g31390 PE=1 SV=1	all0592	444	2e-124	COG0661	Predicted unusual protein kinase	K08869	0	819	osa:4350081	aarF domain-containing kinase	GO:0006464//protein modification process	GO:0016301//kinase activity;GO:0032559	GO:0044434//chloroplast part
Unigene0001303	2333	0	0	0	0	gi|359475997|ref|XP_002280681.2|	578	1e-163	PREDICTED: uncharacterized aarF domain-containing protein kinase At4g31390, chloroplastic-like [Vitis vinifera]	sp|Q8RWG1|Y4139_ARATH	563	2e-159	Uncharacterized aarF domain-containing protein kinase At4g31390, chloroplastic OS=Arabidopsis thaliana GN=At4g31390 PE=1 SV=1	all0592	287	6e-77	COG0661	Predicted unusual protein kinase	--	--	--	--	--	-	-	-
Unigene0001304	201	3	0.8099	0	0	--	--	--	--	--	--	--	--	--	--	--	--	--	--	--	--	--	--	-	-	-
Unigene0001305	1454	75	2.7988	101	3.3288	gi|470132734|ref|XP_004302231.1|	358	2e-97	PREDICTED: shikimate kinase 1, chloroplastic-like [Fragaria vesca subsp. vesca]	sp|Q9SJ05|SK1_ARATH	322	6e-87	Shikimate kinase 1, chloroplastic OS=Arabidopsis thaliana GN=SK1 PE=1 SV=2	sll1669	119	2e-26	COG0703	Shikimate kinase	K00891	4e-98	358	vvi:100262762	shikimate kinase [EC:2.7.1.71]	GO:0032787//monocarboxylic acid metabolic process	GO:0016301//kinase activity	GO:0009536//plastid
Unigene0001306	254	5	1.0681	3	0.566	--	--	--	--	--	--	--	--	--	--	--	--	--	--	--	--	--	--	-	-	-
Unigene0001307	259	4	0.838	2	0.37	--	--	--	--	--	--	--	--	--	--	--	--	--	--	--	--	--	--	-	-	-
Unigene0001308	201	6	1.6197	3	0.7152	gi|359477716|ref|XP_003632012.1|	107	8e-23	PREDICTED: 1-aminocyclopropane-1-carboxylate oxidase homolog 3 [Vitis vinifera]	sp|Q84MB3|ACCH1_ARATH	103	3e-22	1-aminocyclopropane-1-carboxylate oxidase homolog 1 OS=Arabidopsis thaliana GN=At1g06620 PE=2 SV=1	--	--	--	--	--	--	--	--	--	--	GO:0019758;GO:0010675	GO:0046914//transition metal ion binding;GO:0016706//oxidoreductase activity, acting on paired donors, with incorporation or reduction of molecular oxygen, 2-oxoglutarate as one donor, and incorporation of one atom each of oxygen into both donors	-
Unigene0001309	1143	90	4.2725	121	5.073	gi|508702278|gb|EOX94174.1|	293	5e-78	Cyclin-dependent kinase B1,2 [Theobroma cacao]	sp|Q2V419|CKB12_ARATH	278	5e-74	Cyclin-dependent kinase B1-2 OS=Arabidopsis thaliana GN=CDKB1-2 PE=1 SV=2	YBL016w	75.1	2e-13	COG0515	Serine/threonine protein kinase	--	--	--	--	--	GO:0048646//anatomical structure formation involved in morphogenesis;GO:0000902//cell morphogenesis;GO:0006796//phosphate-containing compound metabolic process;GO:0050794//regulation of cellular process;GO:0009793//embryo development ending in seed dormancy;GO:0006464//protein modification process	GO:0004674//protein serine/threonine kinase activity;GO:0005515//protein binding;GO:0032559	GO:0043231//intracellular membrane-bounded organelle;GO:0043234//protein complex
Unigene0001310	863	0	0	0	0	gi|508699906|gb|EOX91802.1|	182	7e-45	Transcription factor-like protein [Theobroma cacao]	sp|Q95WA4|SWP2_ENCIN	86.3	3e-16	Spore wall protein 2 OS=Encephalitozoon intestinalis GN=SWP2 PE=1 SV=1	YLR106c	77.8	2e-14	COG5271	AAA ATPase containing von Willebrand factor type A (vWA) domain	--	--	--	--	--	-	-	-
Unigene0001311	982	2	0.1105	0	0	gi|508699906|gb|EOX91802.1|	182	8e-45	Transcription factor-like protein [Theobroma cacao]	sp|Q95WA4|SWP2_ENCIN	86.3	3e-16	Spore wall protein 2 OS=Encephalitozoon intestinalis GN=SWP2 PE=1 SV=1	YLR106c	77.8	3e-14	COG5271	AAA ATPase containing von Willebrand factor type A (vWA) domain	--	--	--	--	--	-	-	-
Unigene0001312	742	11	0.8044	21	1.3563	gi|508703357|gb|EOX95253.1|	194	2e-48	WD40/YVTN repeat-like-containing domain,Bromodomain isoform 3, partial [Theobroma cacao]	sp|Q8VDD9|PHIP_MOUSE	53.1	2e-06	PH-interacting protein OS=Mus musculus GN=Phip PE=1 SV=2	--	--	--	--	--	K11798	1e-43	176	rcu:RCOM_1347210	bromodomain and WD repeat domain containing protein 1/3	-	-	-
Unigene0001313	2027	115	3.0784	97	2.2932	gi|508775444|gb|EOY22700.1|	885	0	Clp ATPase isoform 1 [Theobroma cacao]	sp|P42762|CLPD_ARATH	805	0	Chaperone protein ClpD, chloroplastic OS=Arabidopsis thaliana GN=CLPD PE=1 SV=1	alr2999	519	7e-147	COG0542	ATPases with chaperone activity, ATP-binding subunit	K03696	0	846	pop:POPTR_773307	ATP-dependent Clp protease ATP-binding subunit ClpC	GO:0051259//protein oligomerization;GO:0043170	GO:0042802//identical protein binding;GO:0017111//nucleoside-triphosphatase activity;GO:0032559	GO:0009526//plastid envelope;GO:0009532//plastid stroma
Unigene0001314	1495	64	2.3228	83	2.6605	gi|508777792|gb|EOY25048.1|	560	1e-158	Alpha/beta-Hydrolases superfamily protein isoform 1 [Theobroma cacao]	sp|Q680C0|GDL62_ARATH	477	9e-134	GDSL esterase/lipase At4g10955 OS=Arabidopsis thaliana GN=At4g10955 PE=2 SV=1	--	--	--	--	--	--	--	--	--	--	-	-	-
Unigene0001315	1389	71	2.7736	80	2.76	gi|508777792|gb|EOY25048.1|	516	1e-145	Alpha/beta-Hydrolases superfamily protein isoform 1 [Theobroma cacao]	sp|Q680C0|GDL62_ARATH	436	3e-121	GDSL esterase/lipase At4g10955 OS=Arabidopsis thaliana GN=At4g10955 PE=2 SV=1	--	--	--	--	--	--	--	--	--	--	-	-	-
Unigene0001316	3637	54	0.8056	39	0.5139	gi|508708545|gb|EOY00442.1|	1159	0	Splicing factor PWI domain-containing protein / RNA recognition motif-containing protein isoform 1 [Theobroma cacao]	sp|B2RY56|RBM25_MOUSE	296	1e-78	RNA-binding protein 25 OS=Mus musculus GN=Rbm25 PE=1 SV=2	YLR106c	68.6	8e-11	COG5271	AAA ATPase containing von Willebrand factor type A (vWA) domain	K12822	0	1150	pop:POPTR_822012	RNA-binding protein 25	GO:0006396//RNA processing	GO:0036094	-
Unigene0001317	1754	104	3.2173	107	2.9233	gi|508712036|gb|EOY03933.1|	711	0	Cytochrome P450, family 81, subfamily D, polypeptide 8 [Theobroma cacao]	sp|Q9FG65|C81D1_ARATH	588	6e-167	Cytochrome P450 81D1 OS=Arabidopsis thaliana GN=CYP81D1 PE=2 SV=1	BH0579	127	8e-29	COG2124	Cytochrome P450	--	--	--	--	--	GO:0052482;GO:0009628//response to abiotic stimulus;GO:0019761//glucosinolate biosynthetic process	GO:0016709//oxidoreductase activity, acting on paired donors, with incorporation or reduction of molecular oxygen, NADH or NADPH as one donor, and incorporation of one atom of oxygen;GO:0005506//iron ion binding	GO:0043231//intracellular membrane-bounded organelle;GO:0016020//membrane
Unigene0001318	1358	39	1.5583	27	0.9528	gi|508722906|gb|EOY14803.1|	569	1e-161	PfkB-like carbohydrate kinase family protein isoform 1 [Theobroma cacao]	sp|Q55480|YZ37_SYNY3	98.2	1e-19	Uncharacterized sugar kinase slr0537 OS=Synechocystis sp. (strain PCC 6803 / Kazusa) GN=slr0537 PE=3 SV=1	AGc118	137	3e-32	COG0524	Sugar kinases, ribokinase family	--	--	--	--	--	-	-	-
Unigene0001319	1742	179	5.5755	247	6.7948	gi|508706525|gb|EOX98421.1|	503	1e-172	Phosphatase 2C family protein [Theobroma cacao]	sp|O81760|P2C63_ARATH	454	1e-152	Probable protein phosphatase 2C 63 OS=Arabidopsis thaliana GN=At4g33920 PE=2 SV=1	SPCC1223.11	86.7	1e-16	COG0631	Serine/threonine protein phosphatase	--	--	--	--	--	-	-	-
Unigene0001320	2039	43	1.1443	13	0.3055	gi|508706525|gb|EOX98421.1|	363	9e-99	Phosphatase 2C family protein [Theobroma cacao]	sp|O81760|P2C63_ARATH	320	2e-86	Probable protein phosphatase 2C 63 OS=Arabidopsis thaliana GN=At4g33920 PE=2 SV=1	SPCC1223.11	55.1	5e-07	COG0631	Serine/threonine protein phosphatase	--	--	--	--	--	GO:0006464//protein modification process	GO:0046914//transition metal ion binding;GO:0004721//phosphoprotein phosphatase activity	GO:0043234//protein complex
Unigene0001321	1384	19	0.7449	9	0.3116	gi|6433834|emb|CAB60721.1|	530	1e-149	ACC synthase [Citrus sinensis]	sp|P31531|1A1C_SOYBN	487	8e-137	1-aminocyclopropane-1-carboxylate synthase OS=Glycine max GN=ACS1 PE=2 SV=1	BH1695	77	7e-14	COG0436	Aspartate/tyrosine/aromatic aminotransferase	K01762	2e-139	496	rcu:RCOM_1688460	1-aminocyclopropane-1-carboxylate synthase [EC:4.4.1.14]	-	-	-
Unigene0001322	1384	349	13.6827	364	12.6035	gi|508776934|gb|EOY24190.1|	442	1e-123	CLP protease R subunit 4 isoform 1 [Theobroma cacao]	sp|Q8LB10|CLPR4_ARATH	422	4e-117	ATP-dependent Clp protease proteolytic subunit-related protein 4, chloroplastic OS=Arabidopsis thaliana GN=CLPR4 PE=1 SV=1	all4358	224	2e-58	COG0740	Protease subunit of ATP-dependent Clp proteases	K01358	3e-124	445	pop:POPTR_580163	ATP-dependent Clp protease, protease subunit [EC:3.4.21.92]	-	-	GO:0009532//plastid stroma
Unigene0001323	788	5	0.3443	2	0.1216	--	--	--	--	--	--	--	--	--	--	--	--	--	--	--	--	--	--	-	-	-
Unigene0001324	430	26	3.2808	6	0.6687	gi|460402006|ref|XP_004246506.1|	65.5	4e-10	PREDICTED: F-box/FBD/LRR-repeat protein At5g56420-like [Solanum lycopersicum]	sp|Q1PE04|FBL25_ARATH	55.5	1e-07	F-box/LRR-repeat protein 25 OS=Arabidopsis thaliana GN=FBL25 PE=2 SV=1	--	--	--	--	--	--	--	--	--	--	-	-	-
Unigene0001325	274	6	1.1882	3	0.5247	--	--	--	--	--	--	--	--	--	--	--	--	--	--	--	--	--	--	-	-	-
Unigene0001326	224	12	2.9068	4	0.8557	--	--	--	--	--	--	--	--	--	--	--	--	--	--	--	--	--	--	-	-	-
Unigene0001327	423	15	1.9241	5	0.5664	--	--	--	--	--	--	--	--	--	--	--	--	--	--	--	--	--	--	-	-	-
Unigene0001328	1594	101	3.4381	94	2.8259	gi|502091969|ref|XP_004489681.1|	286	1e-75	PREDICTED: double-stranded RNA-binding protein 1-like [Cicer arietinum]	sp|Q8H1D4|DRB4_ARATH	192	5e-48	Double-stranded RNA-binding protein 4 OS=Arabidopsis thaliana GN=DBR4 PE=1 SV=1	--	--	--	--	--	--	--	--	--	--	GO:0050896//response to stimulus;GO:0016441//posttranscriptional gene silencing	GO:0003723//RNA binding	GO:0005622//intracellular
Unigene0001329	201	4	1.0798	2	0.4768	--	--	--	--	--	--	--	--	--	--	--	--	--	--	--	--	--	--	-	-	-
Unigene0001330	213	18	4.5854	19	4.2746	--	--	--	--	--	--	--	--	--	--	--	--	--	--	--	--	--	--	-	-	-
Unigene0001331	327	60	9.956	62	9.0859	gi|356541960|ref|XP_003539440.1|	109	2e-23	PREDICTED: LOW QUALITY PROTEIN: uncharacterized isomerase BH0283-like [Glycine max]	sp|Q9KG32|Y283_BACHD	75.9	8e-14	Uncharacterized isomerase BH0283 OS=Bacillus halodurans (strain ATCC BAA-125 / DSM 18197 / FERM 7344 / JCM 9153 / C-125) GN=BH0283 PE=3 SV=1	BH0283	75.9	2e-14	COG0384	Predicted epimerase, PhzC/PhzF homolog	K06998	1e-24	110	rcu:RCOM_0558850		GO:0008152//metabolic process	GO:0003824//catalytic activity	-
Unigene0001332	2795	285	5.5328	275	4.7149	gi|508703229|gb|EOX95125.1|	1404	0	Exocyst complex component sec15B isoform 1 [Theobroma cacao]	sp|Q9LXX6|EXOC6_ARATH	793	0	Probable exocyst complex component 6 OS=Arabidopsis thaliana GN=At3g56640 PE=3 SV=2	--	--	--	--	--	--	--	--	--	--	GO:0032501//multicellular organismal process;GO:0048278//vesicle docking;GO:0000904//cell morphogenesis involved in differentiation	-	GO:0043234//protein complex;GO:0044444//cytoplasmic part;GO:0016020//membrane
Unigene0001333	265	6	1.2285	3	0.5425	--	--	--	--	--	--	--	--	--	--	--	--	--	--	--	--	--	--	-	-	-
Unigene0001334	259	8	1.676	1	0.185	gi|451798992|gb|AGF69194.1|	58.9	3e-08	disease resistance protein At3g14460-like protein 1 [Vitis labrusca]	--	--	--	--	--	--	--	--	--	--	--	--	--	--	-	-	-
Unigene0001335	358	60	9.0939	47	6.2913	--	--	--	--	--	--	--	--	--	--	--	--	--	--	--	--	--	--	-	-	-
Unigene0001336	680	24	1.9151	6	0.4228	gi|225448685|ref|XP_002280352.1|	144	2e-33	PREDICTED: macro domain-containing protein VPA0103 [Vitis vinifera]	sp|Q8RB30|Y995_THETN	76.3	2e-13	Macro domain-containing protein TTE0995 OS=Thermoanaerobacter tengcongensis (strain DSM 15242 / JCM 11007 / NBRC 100824 / MB4) GN=TTE0995 PE=4 SV=1	RSc0334	67	3e-11	COG2110	Predicted phosphatase homologous to the C-terminal domain of histone macroH2A1	--	--	--	--	--	-	GO:0034062//RNA polymerase activity	-
Unigene0001337	2398	146	3.3036	138	2.7577	gi|508705337|gb|EOX97233.1|	1024	0	RING/U-box superfamily protein isoform 1 [Theobroma cacao]	sp|Q949V6|ARI1_ARATH	890	0	Probable E3 ubiquitin-protein ligase ARI1 OS=Arabidopsis thaliana GN=ARI1 PE=2 SV=1	--	--	--	--	--	K11968	0	1041	rcu:RCOM_0938350	ariadne-1	-	GO:0046914//transition metal ion binding	-
Unigene0001338	201	36	9.7182	34	8.106	--	--	--	--	--	--	--	--	--	--	--	--	--	--	--	--	--	--	-	-	-
Unigene0001339	2786	289	5.6286	132	2.2705	gi|224125028|ref|XP_002329873.1|	848	0	GRAS family transcription factor [Populus trichocarpa]	sp|O81316|SCL6_ARATH	374	2e-102	Scarecrow-like protein 6 OS=Arabidopsis thaliana GN=SCL6 PE=1 SV=1	--	--	--	--	--	--	--	--	--	--	GO:0010467//gene expression;GO:0032774	-	-
Unigene0001340	2061	7	0.1843	2	0.0465	gi|508704400|gb|EOX96296.1|	764	0	GRAS family transcription factor [Theobroma cacao]	sp|O81316|SCL6_ARATH	436	3e-121	Scarecrow-like protein 6 OS=Arabidopsis thaliana GN=SCL6 PE=1 SV=1	--	--	--	--	--	--	--	--	--	--	GO:0010467//gene expression;GO:0032774	-	-
Unigene0001341	2404	12	0.2708	14	0.2791	gi|508779908|gb|EOY27164.1|	820	0	Dihydrolipoamide acetyltransferase, long form protein isoform 1 [Theobroma cacao]	sp|Q8RWN9|OPD22_ARATH	770	0	Dihydrolipoyllysine-residue acetyltransferase component 2 of pyruvate dehydrogenase complex, mitochondrial OS=Arabidopsis thaliana GN=At3g13930 PE=1 SV=2	SPCC794.07	380	8e-105	COG0508	Pyruvate/2-oxoglutarate dehydrogenase complex, dihydrolipoamide acyltransferase (E2) component, and related enzymes	K00627	0	847	rcu:RCOM_0654800	pyruvate dehydrogenase E2 component (dihydrolipoamide acetyltransferase) [EC:2.3.1.12]	GO:0032787//monocarboxylic acid metabolic process	GO:0046914//transition metal ion binding;GO:0016418	GO:0009526//plastid envelope;GO:0043234//protein complex
Unigene0001342	731	35	2.598	22	1.4422	gi|459354682|gb|AGG55717.1|	92	1e-17	cyclin-dependent protein kinase inhibitor Siamese [Gossypium arboreum]	sp|Q9SGE2|SMR2_ARATH	55.8	3e-07	Cyclin-dependent protein kinase inhibitor SMR2 OS=Arabidopsis thaliana GN=SMR2 PE=1 SV=1	--	--	--	--	--	--	--	--	--	--	-	-	-
Unigene0001343	762	23	1.6378	10	0.6289	gi|449516481|ref|XP_004165275.1|	94	3e-18	PREDICTED: auxin response factor 9-like, partial [Cucumis sativus]	sp|Q8L7G0|ARFA_ARATH	90.1	1e-17	Auxin response factor 1 OS=Arabidopsis thaliana GN=ARF1 PE=1 SV=2	--	--	--	--	--	K14486	9e-20	97.1	rcu:RCOM_0496620	auxin response factor	GO:0010038//response to metal ion;GO:0009725//response to hormone stimulus;GO:0006355//regulation of transcription, DNA-dependent;GO:0010260//organ senescence	GO:0003676//nucleic acid binding;GO:0060229//lipase activator activity;GO:0001071//nucleic acid binding transcription factor activity;GO:0032561//guanyl ribonucleotide binding	GO:0043231//intracellular membrane-bounded organelle;GO:0044444//cytoplasmic part
Unigene0001344	267	11	2.2354	2	0.359	--	--	--	--	--	--	--	--	--	--	--	--	--	--	--	--	--	--	-	-	-
Unigene0001345	214	4	1.0142	1	0.2239	--	--	--	--	--	--	--	--	--	--	--	--	--	--	--	--	--	--	-	-	-
Unigene0001346	2486	38	0.8294	14	0.2699	gi|359485493|ref|XP_003633282.1|	900	0	PREDICTED: cellulose synthase-like protein H1-like isoform 2 [Vitis vinifera]	sp|O80891|CSLB4_ARATH	740	0	Cellulose synthase-like protein B4 OS=Arabidopsis thaliana GN=CSLB4 PE=3 SV=1	alr3757	80.9	1e-14	COG1215	Glycosyltransferases, probably involved in cell wall biogenesis	--	--	--	--	--	GO:0009987//cellular process	GO:0016757//transferase activity, transferring glycosyl groups	GO:0016020//membrane
Unigene0001347	1241	0	0	0	0	gi|502139359|ref|XP_004503738.1|	222	1e-56	PREDICTED: translation initiation factor IF-2-like [Cicer arietinum]	sp|A0LXQ1|IF2_GRAFK	58.5	1e-07	Translation initiation factor IF-2 OS=Gramella forsetii (strain KT0803) GN=infB PE=3 SV=1	--	--	--	--	--	--	--	--	--	--	-	GO:0046872//metal ion binding	GO:0016020//membrane
Unigene0001348	1463	78	2.8929	42	1.3757	gi|502139359|ref|XP_004503738.1|	366	1e-100	PREDICTED: translation initiation factor IF-2-like [Cicer arietinum]	sp|O77788|NFM_BOVIN	70.9	2e-11	Neurofilament medium polypeptide OS=Bos taurus GN=NEFM PE=1 SV=3	MA1299	50.1	1e-05	COG0630	Type IV secretory pathway, VirB11 components, and related ATPases involved in archaeal flagella biosynthesis	--	--	--	--	--	GO:0006875//cellular metal ion homeostasis	GO:0046872//metal ion binding	GO:0016020//membrane
Unigene0001349	763	0	0	0	0	gi|502139359|ref|XP_004503738.1|	187	3e-46	PREDICTED: translation initiation factor IF-2-like [Cicer arietinum]	sp|Q9SZN7|HIP26_ARATH	54.7	7e-07	Heavy metal-associated isoprenylated plant protein 26 OS=Arabidopsis thaliana GN=HIPP26 PE=1 SV=1	--	--	--	--	--	--	--	--	--	--	GO:0006875//cellular metal ion homeostasis	GO:0046872//metal ion binding	GO:0016020//membrane
Unigene0001350	1122	70	3.3852	104	4.4419	gi|502139359|ref|XP_004503738.1|	163	8e-39	PREDICTED: translation initiation factor IF-2-like [Cicer arietinum]	sp|Q9SZN7|HIP26_ARATH	55.8	6e-07	Heavy metal-associated isoprenylated plant protein 26 OS=Arabidopsis thaliana GN=HIPP26 PE=1 SV=1	--	--	--	--	--	--	--	--	--	--	-	-	-
Unigene0001351	1084	2	0.1001	1	0.0442	gi|502139359|ref|XP_004503738.1|	197	4e-49	PREDICTED: translation initiation factor IF-2-like [Cicer arietinum]	sp|Q9SZN7|HIP26_ARATH	56.2	4e-07	Heavy metal-associated isoprenylated plant protein 26 OS=Arabidopsis thaliana GN=HIPP26 PE=1 SV=1	--	--	--	--	--	--	--	--	--	--	-	GO:0046872//metal ion binding	GO:0016020//membrane
Unigene0001352	935	0	0	0	0	gi|502139359|ref|XP_004503738.1|	195	1e-48	PREDICTED: translation initiation factor IF-2-like [Cicer arietinum]	sp|Q9SZN7|HIP26_ARATH	54.7	1e-06	Heavy metal-associated isoprenylated plant protein 26 OS=Arabidopsis thaliana GN=HIPP26 PE=1 SV=1	--	--	--	--	--	--	--	--	--	--	-	GO:0046872//metal ion binding	GO:0016020//membrane
Unigene0001353	982	0	0	0	0	gi|502139359|ref|XP_004503738.1|	244	2e-63	PREDICTED: translation initiation factor IF-2-like [Cicer arietinum]	sp|A0LXQ1|IF2_GRAFK	54.7	1e-06	Translation initiation factor IF-2 OS=Gramella forsetii (strain KT0803) GN=infB PE=3 SV=1	--	--	--	--	--	--	--	--	--	--	-	GO:0046872//metal ion binding	GO:0016020//membrane
Unigene0001354	863	0	0	1	0.0555	gi|502139359|ref|XP_004503738.1|	185	1e-45	PREDICTED: translation initiation factor IF-2-like [Cicer arietinum]	sp|Q9SZN7|HIP26_ARATH	54.7	8e-07	Heavy metal-associated isoprenylated plant protein 26 OS=Arabidopsis thaliana GN=HIPP26 PE=1 SV=1	--	--	--	--	--	--	--	--	--	--	-	GO:0046872//metal ion binding	GO:0016020//membrane
Unigene0001355	227	8	1.9123	5	1.0555	--	--	--	--	--	--	--	--	--	--	--	--	--	--	--	--	--	--	-	-	-
Unigene0001356	855	9	0.5712	4	0.2242	--	--	--	--	--	--	--	--	--	--	--	--	--	--	--	--	--	--	-	-	-
Unigene0001357	249	9	1.9612	4	0.7698	gi|359479743|ref|XP_002269370.2|	113	1e-24	PREDICTED: peroxisome biogenesis protein 6-like [Vitis vinifera]	sp|Q8RY16|PEX6_ARATH	80.5	3e-15	Peroxisome biogenesis protein 6 OS=Arabidopsis thaliana GN=PEX6 PE=1 SV=1	--	--	--	--	--	K13339	2e-25	113	vvi:100259587	peroxin-6	GO:0009987//cellular process	GO:0042623//ATPase activity, coupled;GO:0032559	-
Unigene0001358	210	4	1.0335	1	0.2282	--	--	--	--	--	--	--	--	--	--	--	--	--	--	--	--	--	--	-	-	-
Unigene0001359	218	9	2.2401	6	1.3189	--	--	--	--	--	--	--	--	--	--	--	--	--	--	--	--	--	--	-	-	-
Unigene0001360	640	62	5.2565	49	3.6689	gi|449463416|ref|XP_004149430.1|	191	8e-48	PREDICTED: auxilin-related protein 2-like [Cucumis sativus]	sp|Q9SU08|AUXI1_ARATH	185	2e-46	Auxilin-related protein 1 OS=Arabidopsis thaliana GN=At4g12780 PE=1 SV=2	--	--	--	--	--	--	--	--	--	--	-	GO:0005515//protein binding	GO:0044444//cytoplasmic part;GO:0016020//membrane
Unigene0001361	1724	85	2.6752	60	1.6678	gi|357463147|ref|XP_003601855.1|	390	1e-107	Myosin-like protein [Medicago truncatula]	sp|P10587|MYH11_CHICK	85.9	9e-16	Myosin-11 OS=Gallus gallus GN=MYH11 PE=1 SV=4	aq_1006	73.2	1e-12	COG0419	ATPase involved in DNA repair	--	--	--	--	--	-	-	-
Unigene0001362	1060	0	0	0	0	gi|449515532|ref|XP_004164803.1|	316	7e-85	PREDICTED: conserved oligomeric Golgi complex subunit 2-like, partial [Cucumis sativus]	sp|Q921L5|COG2_MOUSE	85.5	6e-16	Conserved oligomeric Golgi complex subunit 2 OS=Mus musculus GN=Cog2 PE=2 SV=2	--	--	--	--	--	--	--	--	--	--	GO:0006810//transport;GO:0006996//organelle organization	-	GO:0044444//cytoplasmic part;GO:0043231//intracellular membrane-bounded organelle
Unigene0001363	2819	0	0	0	0	gi|508787291|gb|EOY34547.1|	628	1e-178	F2P16.20-like protein isoform 3, partial [Theobroma cacao]	sp|Q5I0E6|RPAP2_RAT	65.9	2e-09	RNA polymerase II subunit B1 CTD phosphatase Rpap2 OS=Rattus norvegicus GN=Rpap2 PE=2 SV=1	--	--	--	--	--	--	--	--	--	--	-	-	-
Unigene0001364	1811	158	4.7339	158	4.1808	gi|508711253|gb|EOY03150.1|	699	0	PRP38 family protein isoform 1 [Theobroma cacao]	sp|Q6AXY7|PR38B_RAT	253	3e-66	Pre-mRNA-splicing factor 38B OS=Rattus norvegicus GN=Prpf38b PE=2 SV=1	SMc00062	59.3	2e-08	COG4991	Uncharacterized protein with a bacterial SH3 domain homologue	K12850	0	704	vvi:100267328	pre-mRNA-splicing factor 38B	GO:0006970//response to osmotic stress	-	-
Unigene0001365	2436	120	2.6729	104	2.0459	gi|508724810|gb|EOY16707.1|	726	0	Duplicated homeodomain-like superfamily protein isoform 1 [Theobroma cacao]	sp|Q39117|TGT2_ARATH	473	3e-132	Trihelix transcription factor GT-2 OS=Arabidopsis thaliana GN=GT-2 PE=2 SV=1	CC0042	55.1	6e-07	COG0532	Translation initiation factor 2 (IF-2; GTPase)	--	--	--	--	--	-	-	-
Unigene0001366	222	4	0.9777	1	0.2159	--	--	--	--	--	--	--	--	--	--	--	--	--	--	--	--	--	--	-	-	-
Unigene0001367	303	14	2.5071	15	2.3723	gi|302826567|ref|XP_002994726.1|	81.3	6e-15	hypothetical protein SELMODRAFT_139061 [Selaginella moellendorffii]	--	--	--	--	--	--	--	--	--	--	--	--	--	--	-	-	-
Unigene0001368	282	99	19.0488	34	5.7777	gi|357488225|ref|XP_003614400.1|	62	4e-09	Cytochrome P450 likeTBP [Medicago truncatula]	--	--	--	--	--	--	--	--	--	--	--	--	--	--	-	-	-
Unigene0001369	875	10	0.6201	4	0.2191	--	--	--	--	--	--	--	--	--	--	--	--	--	--	--	--	--	--	-	-	-
Unigene0001370	1394	317	12.3389	115	3.9533	gi|459021879|gb|AGG39700.1|	106	2e-21	bZIP transcription factor bZIP8 [Camellia sinensis]	sp|Q9M7Q4|AI5L5_ARATH	81.3	2e-14	ABSCISIC ACID-INSENSITIVE 5-like protein 5 OS=Arabidopsis thaliana GN=ABF2 PE=1 SV=1	--	--	--	--	--	K14432	4e-21	102	pop:POPTR_551849	ABA responsive element binding factor	GO:0009757//hexose mediated signaling;GO:0010468//regulation of gene expression;GO:0006970//response to osmotic stress;GO:0009755//hormone-mediated signaling pathway	GO:0001071//nucleic acid binding transcription factor activity;GO:0003677//DNA binding;GO:0005515//protein binding	GO:0043231//intracellular membrane-bounded organelle
Unigene0001371	325	10	1.6695	3	0.4423	gi|224119844|ref|XP_002318176.1|	52.8	2e-06	AP2/ERF domain-containing transcription factor [Populus trichocarpa]	--	--	--	--	--	--	--	--	--	--	--	--	--	--	-	-	-
Unigene0001372	426	1	0.1274	5	0.5625	gi|225456495|ref|XP_002280924.1|	54.3	8e-07	PREDICTED: ethylene-responsive transcription factor ERF114-like [Vitis vinifera]	--	--	--	--	--	--	--	--	--	--	--	--	--	--	GO:0010468//regulation of gene expression;GO:0032774	GO:0003676//nucleic acid binding;GO:0001071//nucleic acid binding transcription factor activity	GO:0043231//intracellular membrane-bounded organelle
Unigene0001373	230	44	10.3802	55	11.4593	gi|449503281|ref|XP_004161924.1|	54.3	8e-07	PREDICTED: ubiquitin-like domain-containing CTD phosphatase-like [Cucumis sativus]	--	--	--	--	--	--	--	--	--	--	--	--	--	--	-	GO:0016791//phosphatase activity	GO:0043231//intracellular membrane-bounded organelle
Unigene0001374	1640	0	0	0	0	gi|470105862|ref|XP_004289297.1|	310	5e-83	PREDICTED: RING-H2 finger protein ATL52-like [Fragaria vesca subsp. vesca]	sp|Q9LX93|ATL55_ARATH	158	1e-37	E3 ubiquitin-protein ligase RING1 OS=Arabidopsis thaliana GN=ATL55 PE=1 SV=1	ECU07g0330	62	3e-09	COG5540	RING-finger-containing ubiquitin ligase	--	--	--	--	--	-	-	-
Unigene0001375	633	17	1.4572	21	1.5898	gi|359497260|ref|XP_002263978.2|	107	2e-22	PREDICTED: GTP-binding protein At3g49725, chloroplastic-like, partial [Vitis vinifera]	sp|Q0WTB4|Y3725_ARATH	76.3	2e-13	GTP-binding protein At3g49725, chloroplastic OS=Arabidopsis thaliana GN=At3g49725 PE=2 SV=2	--	--	--	--	--	--	--	--	--	--	-	-	-
Unigene0001376	2042	95	2.5243	54	1.2673	gi|460404924|ref|XP_004247928.1|	581	1e-164	PREDICTED: probable methyltransferase PMT8-like [Solanum lycopersicum]	sp|Q7XI08|XB34_ORYSJ	477	1e-133	Probable E3 ubiquitin-protein ligase XBOS34 OS=Oryza sativa subsp. japonica GN=XBOS34 PE=2 SV=1	RSc0781	62	4e-09	COG0666	FOG: Ankyrin repeat	--	--	--	--	--	-	-	-
Unigene0001377	1991	52	1.4171	48	1.1553	gi|460404924|ref|XP_004247928.1|	565	1e-159	PREDICTED: probable methyltransferase PMT8-like [Solanum lycopersicum]	sp|Q7XI08|XB34_ORYSJ	488	5e-137	Probable E3 ubiquitin-protein ligase XBOS34 OS=Oryza sativa subsp. japonica GN=XBOS34 PE=2 SV=1	RSc0781	62	4e-09	COG0666	FOG: Ankyrin repeat	--	--	--	--	--	-	GO:0046872//metal ion binding	-
Unigene0001378	3285	487	8.0441	474	6.9146	gi|508780430|gb|EOY27686.1|	1439	0	Cullin-4B isoform 1 [Theobroma cacao]	sp|Q8LGH4|CUL4_ARATH	1251	0	Cullin-4 OS=Arabidopsis thaliana GN=CUL4 PE=1 SV=1	SPAC3A11.08	410	1e-113	COG5647	Cullin, a subunit of E3 ubiquitin ligase	K10609	0	1410	vvi:100233055	cullin 4	GO:0019941//modification-dependent protein catabolic process	GO:0044389	GO:0000151//ubiquitin ligase complex
Unigene0001379	766	4	0.2833	3	0.1877	gi|508713811|gb|EOY05708.1|	239	4e-62	17.6 kDa class II heat shock protein [Theobroma cacao]	--	--	--	--	--	--	--	--	--	--	--	--	--	--	-	-	GO:0031090//organelle membrane
Unigene0001380	320	14	2.3739	12	1.797	gi|460369620|ref|XP_004230655.1|	97.8	7e-20	PREDICTED: probable S-acyltransferase At2g14255-like isoform 2 [Solanum lycopersicum]	sp|Q3EC11|ZDHC2_ARATH	78.2	2e-14	Probable S-acyltransferase At2g14255 OS=Arabidopsis thaliana GN=At2g14255 PE=2 SV=2	--	--	--	--	--	--	--	--	--	--	GO:0008152//metabolic process	GO:0016628//oxidoreductase activity, acting on the CH-CH group of donors, NAD or NADP as acceptor;GO:0046914//transition metal ion binding	-
Unigene0001381	1812	37	1.108	46	1.2165	gi|495025961|gb|AGL39712.1|	73.6	2e-11	NAC transcription factor 056 [Jatropha curcas]	sp|Q5A2K0|NST1_CANAL	64.3	3e-09	Stress response protein NST1 OS=Candida albicans (strain SC5314 / ATCC MYA-2876) GN=NST1 PE=3 SV=1	MJ1322	60.5	1e-08	COG0419	ATPase involved in DNA repair	--	--	--	--	--	-	-	-
Unigene0001382	349	6	0.9328	0	0	gi|356463712|gb|AET08894.1|	87.4	9e-17	metacaspase 9 [Aegilops tauschii]	sp|Q7XJE6|MCA1_ARATH	81.6	1e-15	Metacaspase-1 OS=Arabidopsis thaliana GN=AMC1 PE=1 SV=1	--	--	--	--	--	--	--	--	--	--	GO:0043068//positive regulation of programmed cell death	-	-
Unigene0001383	1171	167	7.7382	126	5.1563	gi|508775455|gb|EOY22711.1|	475	1e-132	Metacaspase 1 isoform 1 [Theobroma cacao]	sp|Q7XJE6|MCA1_ARATH	434	8e-121	Metacaspase-1 OS=Arabidopsis thaliana GN=AMC1 PE=1 SV=1	--	--	--	--	--	--	--	--	--	--	-	-	-
Unigene0001384	1636	57	1.8905	22	0.6444	--	--	--	--	--	--	--	--	--	--	--	--	--	--	--	--	--	--	-	-	-
Unigene0001385	221	5	1.2276	3	0.6505	--	--	--	--	--	--	--	--	--	--	--	--	--	--	--	--	--	--	-	-	-
Unigene0001386	1008	57	3.0683	16	0.7606	gi|17063176|gb|AAL32983.1|	88.2	3e-16	SYNC1 protein [Arabidopsis thaliana]	--	--	--	--	--	--	--	--	--	--	--	--	--	--	-	-	-
Unigene0001387	1270	0	0	0	0	gi|225424504|ref|XP_002285219.1|	349	1e-94	PREDICTED: probable NAD(P)H-dependent oxidoreductase 1 [Vitis vinifera]	sp|Q9SQ64|COR2_PAPSO	305	6e-82	Non-functional NADPH-dependent codeinone reductase 2 OS=Papaver somniferum GN=COR2 PE=1 SV=1	slr0942	182	1e-45	COG0656	Aldo/keto reductases, related to diketogulonate reductase	--	--	--	--	--	GO:0008152//metabolic process;GO:0000041//transition metal ion transport	GO:0016747//transferase activity, transferring acyl groups other than amino-acyl groups	-
Unigene0001388	1188	0	0	1	0.0403	gi|225424504|ref|XP_002285219.1|	349	9e-95	PREDICTED: probable NAD(P)H-dependent oxidoreductase 1 [Vitis vinifera]	sp|Q9SQ64|COR2_PAPSO	305	6e-82	Non-functional NADPH-dependent codeinone reductase 2 OS=Papaver somniferum GN=COR2 PE=1 SV=1	slr0942	182	1e-45	COG0656	Aldo/keto reductases, related to diketogulonate reductase	--	--	--	--	--	GO:0008152//metabolic process;GO:0000041//transition metal ion transport	GO:0016747//transferase activity, transferring acyl groups other than amino-acyl groups	-
Unigene0001389	1122	0	0	0	0	gi|225424504|ref|XP_002285219.1|	349	8e-95	PREDICTED: probable NAD(P)H-dependent oxidoreductase 1 [Vitis vinifera]	sp|Q9SQ64|COR2_PAPSO	305	5e-82	Non-functional NADPH-dependent codeinone reductase 2 OS=Papaver somniferum GN=COR2 PE=1 SV=1	slr0942	182	1e-45	COG0656	Aldo/keto reductases, related to diketogulonate reductase	--	--	--	--	--	GO:0008152//metabolic process;GO:0000041//transition metal ion transport	GO:0016747//transferase activity, transferring acyl groups other than amino-acyl groups	-
Unigene0001390	219	3	0.7433	0	0	--	--	--	--	--	--	--	--	--	--	--	--	--	--	--	--	--	--	-	-	-
Unigene0001391	905	0	0	0	0	--	--	--	--	--	--	--	--	--	--	--	--	--	--	--	--	--	--	-	-	-
Unigene0001392	1150	0	0	0	0	gi|297597398|ref|NP_001043923.2|	62.8	2e-08	Os01g0689600 [Oryza sativa Japonica Group]	--	--	--	--	--	--	--	--	--	--	--	--	--	--	-	-	-
Unigene0001393	539	7	0.7047	4	0.3556	gi|297597398|ref|NP_001043923.2|	62.8	4e-09	Os01g0689600 [Oryza sativa Japonica Group]	--	--	--	--	--	--	--	--	--	--	--	--	--	--	-	-	-
Unigene0001394	4069	331	4.4139	384	4.5224	gi|359475506|ref|XP_002271289.2|	659	0	PREDICTED: proline iminopeptidase [Vitis vinifera]	sp|P93732|PIP_ARATH	588	1e-166	Proline iminopeptidase OS=Arabidopsis thaliana GN=PIP PE=2 SV=3	BMEI1608	369	3e-101	COG0596	Predicted hydrolases or acyltransferases (alpha/beta hydrolase superfamily)	K01259	0	639	rcu:RCOM_1381370	proline iminopeptidase [EC:3.4.11.5]	GO:0019538//protein metabolic process	GO:0008238//exopeptidase activity	GO:0044424//intracellular part
Unigene0001395	1922	155	4.3758	181	4.5128	gi|11066213|gb|AAG28503.1|AF196966_1	513	1e-144	hexokinase [Citrus sinensis]	sp|Q9SEK3|HXK1_SPIOL	473	2e-132	Hexokinase-1 OS=Spinacia oleracea GN=HXK1 PE=2 SV=1	SPAC24H6.04	185	3e-46	COG5026	Hexokinase	K00844	1e-140	500	pop:POPTR_825877	hexokinase [EC:2.7.1.1]	-	-	-
Unigene0001396	222	3	0.7332	0	0	--	--	--	--	--	--	--	--	--	--	--	--	--	--	--	--	--	--	-	-	-
Unigene0001397	2339	90	2.0878	68	1.3932	gi|224080379|ref|XP_002306118.1|	956	0	dihydrofolate reductase-thymidylate synthase [Populus trichocarpa]	sp|P51820|DRTS_SOYBN	894	0	Bifunctional dihydrofolate reductase-thymidylate synthase OS=Glycine max PE=1 SV=1	SPAC15E1.04_2	343	8e-94	COG0207	Thymidylate synthase	K13998	0	956	pop:POPTR_648629	dihydrofolate reductase / thymidylate synthase [EC:1.5.1.3 2.1.1.45]	GO:0009177;GO:0006544//glycine metabolic process	GO:0042083//5,10-methylenetetrahydrofolate-dependent methyltransferase activity;GO:0016646//oxidoreductase activity, acting on the CH-NH group of donors, NAD or NADP as acceptor	-
Unigene0001398	727	186	13.8823	201	13.2491	gi|508780415|gb|EOY27671.1|	313	3e-84	Aldolase-type TIM barrel family protein isoform 1 [Theobroma cacao]	sp|Q9LRR9|GLO1_ARATH	303	8e-82	Peroxisomal (S)-2-hydroxy-acid oxidase GLO1 OS=Arabidopsis thaliana GN=GLO1 PE=1 SV=1	all0170	162	7e-40	COG1304	L-lactate dehydrogenase (FMN-dependent) and related alpha-hydroxy acid dehydrogenases	K11517	7e-85	313	rcu:RCOM_0631490	(S)-2-hydroxy-acid oxidase [EC:1.1.3.15]	GO:0008152//metabolic process	GO:0003973//(S)-2-hydroxy-acid oxidase activity;GO:0000166//nucleotide binding	GO:0005911//cell-cell junction;GO:0005840//ribosome;GO:0009532//plastid stroma;GO:0005576//extracellular region;GO:0042579//microbody
Unigene0001399	1716	16	0.5059	26	0.7261	gi|366984550|gb|AEX09184.1|	676	0	glycolate oxidase [Gossypium hirsutum]	sp|P05414|GOX_SPIOL	652	0	Peroxisomal (S)-2-hydroxy-acid oxidase OS=Spinacia oleracea PE=1 SV=1	all0170	342	2e-93	COG1304	L-lactate dehydrogenase (FMN-dependent) and related alpha-hydroxy acid dehydrogenases	K11517	0	667	rcu:RCOM_0631490	(S)-2-hydroxy-acid oxidase [EC:1.1.3.15]	GO:0008152//metabolic process	GO:0003973//(S)-2-hydroxy-acid oxidase activity;GO:0000166//nucleotide binding	GO:0005840//ribosome;GO:0009532//plastid stroma;GO:0005576//extracellular region;GO:0042579//microbody
Unigene0001400	1719	0	0	0	0	gi|366984550|gb|AEX09184.1|	675	0	glycolate oxidase [Gossypium hirsutum]	sp|P05414|GOX_SPIOL	652	0	Peroxisomal (S)-2-hydroxy-acid oxidase OS=Spinacia oleracea PE=1 SV=1	all0170	342	2e-93	COG1304	L-lactate dehydrogenase (FMN-dependent) and related alpha-hydroxy acid dehydrogenases	K11517	0	667	rcu:RCOM_0631490	(S)-2-hydroxy-acid oxidase [EC:1.1.3.15]	GO:0008152//metabolic process	GO:0003973//(S)-2-hydroxy-acid oxidase activity;GO:0000166//nucleotide binding	GO:0005840//ribosome;GO:0009532//plastid stroma;GO:0005576//extracellular region;GO:0042579//microbody
Unigene0001401	311	16	2.7915	6	0.9245	--	--	--	--	--	--	--	--	--	--	--	--	--	--	--	--	--	--	-	-	-
Unigene0001402	408	0	0	0	0	--	--	--	--	--	--	--	--	--	--	--	--	--	--	--	--	--	--	-	-	-
Unigene0001403	269	9	1.8154	1	0.1781	--	--	--	--	--	--	--	--	--	--	--	--	--	--	--	--	--	--	-	-	-
Unigene0001404	1040	343	17.8954	399	18.385	gi|508727492|gb|EOY19389.1|	346	6e-94	Glutathione S-transferase 2 isoform 3 [Theobroma cacao]	sp|P57108|GSTZ_EUPES	323	2e-87	Glutathione S-transferase zeta class OS=Euphorbia esula PE=2 SV=1	VC1347	157	2e-38	COG0625	Glutathione S-transferase	K01800	5e-93	340	vvi:100252270	maleylacetoacetate isomerase [EC:5.2.1.2]	GO:0006520//cellular amino acid metabolic process	GO:0016859//cis-trans isomerase activity	GO:0044424//intracellular part
Unigene0001405	2350	167	3.8559	134	2.7325	gi|508779421|gb|EOY26677.1|	822	0	UDP-Glycosyltransferase superfamily protein isoform 1 [Theobroma cacao]	--	--	--	--	--	--	--	--	--	--	--	--	--	--	GO:0008152//metabolic process	GO:0016740//transferase activity	GO:0043231//intracellular membrane-bounded organelle
Unigene0001406	608	17	1.5171	14	1.1034	gi|508779422|gb|EOY26678.1|	128	1e-28	UDP-Glycosyltransferase superfamily protein isoform 2 [Theobroma cacao]	--	--	--	--	STM0721	48.5	8e-06	COG0438	Glycosyltransferase	--	--	--	--	--	GO:0008152//metabolic process	GO:0016740//transferase activity	GO:0043231//intracellular membrane-bounded organelle
Unigene0001407	1140	51	2.4274	38	1.5974	gi|470132650|ref|XP_004302191.1|	476	1e-133	PREDICTED: dehydrogenase/reductase SDR family member 7-like [Fragaria vesca subsp. vesca]	sp|Q9Y394|DHRS7_HUMAN	168	6e-41	Dehydrogenase/reductase SDR family member 7 OS=Homo sapiens GN=DHRS7 PE=1 SV=1	BS_yqjQ	127	3e-29	COG0300	Short-chain dehydrogenases of various substrate specificities	--	--	--	--	--	-	-	-
Unigene0001408	370	0	0	0	0	gi|449503195|ref|XP_004161881.1|	53.5	1e-06	PREDICTED: proline synthase co-transcribed bacterial homolog protein-like [Cucumis sativus]	--	--	--	--	--	--	--	--	--	K06997	5e-07	52.8	rcu:RCOM_0903650		-	-	-
Unigene0001409	1072	6	0.3037	2	0.0894	gi|508720374|gb|EOY12271.1|	412	1e-114	Pyridoxal phosphate-dependent enzyme, YBL036C type isoform 1 [Theobroma cacao]	sp|O94903|PROSC_HUMAN	219	2e-56	Proline synthase co-transcribed bacterial homolog protein OS=Homo sapiens GN=PROSC PE=1 SV=1	VC0461	157	3e-38	COG0325	Predicted enzyme with a TIM-barrel fold	K06997	3e-117	421	rcu:RCOM_0752450		-	-	-
Unigene0001410	477	0	0	2	0.2009	gi|449503195|ref|XP_004161881.1|	53.5	2e-06	PREDICTED: proline synthase co-transcribed bacterial homolog protein-like [Cucumis sativus]	--	--	--	--	--	--	--	--	--	K06997	7e-07	52.8	rcu:RCOM_0903650		-	-	-
Unigene0001411	515	5	0.5268	0	0	gi|359479583|ref|XP_002275680.2|	180	1e-44	PREDICTED: pentatricopeptide repeat-containing protein At3g22470, mitochondrial-like [Vitis vinifera]	sp|Q3ECK2|PPR92_ARATH	150	3e-36	Pentatricopeptide repeat-containing protein At1g62680, mitochondrial OS=Arabidopsis thaliana GN=At1g62680 PE=2 SV=2	--	--	--	--	--	--	--	--	--	--	-	-	-
Unigene0001412	236	5	1.1496	4	0.8122	gi|449520323|ref|XP_004167183.1|	115	4e-25	PREDICTED: pentatricopeptide repeat-containing protein At3g22470, mitochondrial-like [Cucumis sativus]	sp|Q76C99|RF1_ORYSI	82.4	8e-16	Protein Rf1, mitochondrial OS=Oryza sativa subsp. indica GN=Rf1 PE=2 SV=1	--	--	--	--	--	--	--	--	--	--	-	-	-
Unigene0001413	322	8	1.3481	5	0.7441	gi|470111923|ref|XP_004292190.1|	138	3e-32	PREDICTED: pentatricopeptide repeat-containing protein At3g22470, mitochondrial-like [Fragaria vesca subsp. vesca]	sp|Q9ASZ8|PPR37_ARATH	87	3e-17	Pentatricopeptide repeat-containing protein At1g12620 OS=Arabidopsis thaliana GN=At1g12620 PE=2 SV=1	--	--	--	--	--	--	--	--	--	--	-	-	-
Unigene0001414	1528	139	4.936	133	4.1711	gi|502162551|ref|XP_004512539.1|	189	5e-77	PREDICTED: protein SPT2 homolog [Cicer arietinum]	sp|Q8IMP6|SPT2_DROME	58.5	1e-07	Protein SPT2 homolog OS=Drosophila melanogaster GN=CG5815 PE=1 SV=1	--	--	--	--	--	K15193	7e-109	280	pop:POPTR_820110	protein SPT2	-	-	-
Unigene0001415	2641	192	3.9447	144	2.6129	gi|52207936|emb|CAE47098.1|	1209	0	ABC transporter [Populus tremula x Populus tremuloides]	sp|Q9M1H3|AB4F_ARATH	1167	0	ABC transporter F family member 4 OS=Arabidopsis thaliana GN=ABCF4 PE=2 SV=1	SPBC29A3.09c	416	1e-115	COG0488	ATPase components of ABC transporters with duplicated ATPase domains	K06184	0	1206	vvi:100241016	ATP-binding cassette, sub-family F, member 1	GO:0009207	GO:0017111//nucleoside-triphosphatase activity;GO:0015604//organic phosphonate transmembrane transporter activity;GO:0032559	-
Unigene0001416	1847	326	9.5771	349	9.0549	gi|508773582|gb|EOY20838.1|	843	0	Histone deacetylase 6 isoform 1 [Theobroma cacao]	sp|Q9FML2|HDA6_ARATH	761	0	Histone deacetylase 6 OS=Arabidopsis thaliana GN=HDA6 PE=1 SV=1	YNL330c	531	2e-150	COG0123	Deacetylases, including yeast histone deacetylase and acetoin utilization protein	K06067	0	831	vvi:100244903	histone deacetylase 1/2 [EC:3.5.1.98]	GO:0048609//multicellular organismal reproductive process;GO:0006476//protein deacetylation;GO:0010608//posttranscriptional regulation of gene expression;GO:0009725//response to hormone stimulus;GO:0006970//response to osmotic stress;GO:0032774;GO:0006325//chromatin organization;GO:0003006//developmental process involved in reproduction	GO:0005488//binding;GO:0017136//NAD-dependent histone deacetylase activity	GO:0009526//plastid envelope
Unigene0001417	515	13	1.3697	2	0.1861	gi|5302802|emb|CAB46043.1|	156	2e-37	retrotransposon like protein [Arabidopsis thaliana]	sp|P92519|M810_ARATH	110	5e-24	Uncharacterized mitochondrial protein AtMg00810 OS=Arabidopsis thaliana GN=AtMg00810 PE=4 SV=1	--	--	--	--	--	--	--	--	--	--	GO:0009987//cellular process	GO:0005216//ion channel activity;GO:0005488//binding	GO:0044424//intracellular part
Unigene0001418	2716	110	2.1976	83	1.4644	gi|508773445|gb|EOY20701.1|	1151	0	Tetratricopeptide repeat-like superfamily protein isoform 1 [Theobroma cacao]	sp|A0JM23|NPHP3_XENTR	86.3	1e-15	Nephrocystin-3 OS=Xenopus tropicalis GN=nphp3 PE=2 SV=2	MA0188	104	7e-22	COG0457	FOG: TPR repeat	--	--	--	--	--	-	-	-
Unigene0001419	1034	53	2.7812	48	2.2246	gi|449510882|ref|XP_004163798.1|	152	2e-35	PREDICTED: uncharacterized LOC101208020 [Cucumis sativus]	--	--	--	--	--	--	--	--	--	--	--	--	--	--	-	-	-
Unigene0001420	226	3	0.7203	1	0.212	--	--	--	--	--	--	--	--	--	--	--	--	--	--	--	--	--	--	-	-	-
Unigene0001421	204	45	11.9692	38	8.9264	gi|6573710|gb|AAF17630.1|AC009978_6	102	2e-21	T23E18.19 [Arabidopsis thaliana]	sp|Q6NPN9|DWA2_ARATH	102	6e-22	WD repeat-containing protein DWA2 OS=Arabidopsis thaliana GN=DWA2 PE=1 SV=1	--	--	--	--	--	--	--	--	--	--	GO:0032446//protein modification by small protein conjugation;GO:0009787//regulation of abscisic acid mediated signaling pathway	GO:0005488//binding	GO:0031461//cullin-RING ubiquitin ligase complex;GO:0043231//intracellular membrane-bounded organelle
Unigene0001422	371	8	1.17	1	0.1292	--	--	--	--	--	--	--	--	--	--	--	--	--	--	--	--	--	--	-	-	-
Unigene0001423	1136	92	4.3943	54	2.2779	gi|449519557|ref|XP_004166801.1|	219	1e-55	PREDICTED: uncharacterized LOC101208223 [Cucumis sativus]	--	--	--	--	--	--	--	--	--	--	--	--	--	--	-	-	-
Unigene0001424	215	3	0.7571	5	1.1144	--	--	--	--	--	--	--	--	--	--	--	--	--	--	--	--	--	--	-	-	-
Unigene0001425	1821	75	2.2348	34	0.8947	gi|508717576|gb|EOY09473.1|	509	1e-143	Emsy N Terminus/ plant Tudor-like domains-containing protein isoform 1 [Theobroma cacao]	--	--	--	--	--	--	--	--	--	--	--	--	--	--	-	-	-
Unigene0001426	1899	0	0	0	0	gi|449526634|ref|XP_004170318.1|	441	1e-138	PREDICTED: uncharacterized LOC101207419 [Cucumis sativus]	--	--	--	--	--	--	--	--	--	--	--	--	--	--	-	-	-
Unigene0001427	262	0	0	0	0	gi|79597803|ref|NP_850678.2|	97.8	6e-20	PAP/OAS1 substrate-binding domain superfamily [Arabidopsis thaliana]	--	--	--	--	--	--	--	--	--	--	--	--	--	--	-	GO:0016772//transferase activity, transferring phosphorus-containing groups	-
Unigene0001428	1713	0	0	0	0	gi|449526634|ref|XP_004170318.1|	550	1e-171	PREDICTED: uncharacterized LOC101207419 [Cucumis sativus]	--	--	--	--	--	--	--	--	--	--	--	--	--	--	-	-	-
Unigene0001429	3125	0	0	0	0	gi|449526634|ref|XP_004170318.1|	441	0	PREDICTED: uncharacterized LOC101207419 [Cucumis sativus]	--	--	--	--	--	--	--	--	--	--	--	--	--	--	-	-	-
Unigene0001430	267	5	1.0161	1	0.1795	--	--	--	--	--	--	--	--	--	--	--	--	--	--	--	--	--	--	-	-	-
Unigene0001431	1199	2	0.0905	2	0.0799	gi|512772659|gb|AGO05995.1|	356	7e-97	bZIP transcription factor family protein 11 [Camellia sinensis]	sp|Q04088|POF21_ARATH	261	7e-69	Probable transcription factor PosF21 OS=Arabidopsis thaliana GN=POSF21 PE=2 SV=1	--	--	--	--	--	--	--	--	--	--	-	GO:0005488//binding;GO:0001071//nucleic acid binding transcription factor activity	-
Unigene0001432	234	6	1.3913	1	0.2048	--	--	--	--	--	--	--	--	--	--	--	--	--	--	--	--	--	--	-	-	-
Unigene0001433	2542	1140	24.3338	795	14.9871	gi|225434879|ref|XP_002283212.1|	332	4e-89	PREDICTED: E3 ubiquitin-protein ligase RING1-like [Vitis vinifera]	sp|Q8L9T5|ATL2_ARATH	258	2e-67	RING-H2 finger protein ATL2 OS=Arabidopsis thaliana GN=ATL2 PE=2 SV=2	ECU07g0330	59.3	3e-08	COG5540	RING-finger-containing ubiquitin ligase	--	--	--	--	--	GO:0009743//response to carbohydrate stimulus	-	-
Unigene0001434	411	301	39.738	611	71.24	--	--	--	--	--	--	--	--	--	--	--	--	--	--	--	--	--	--	-	-	-
Unigene0001435	1509	2	0.0719	0	0	gi|359474781|ref|XP_002280163.2|	412	1e-114	PREDICTED: protein BCCIP homolog [Vitis vinifera]	sp|O64885|BCCIP_ARATH	347	1e-94	Protein BCCIP homolog OS=Arabidopsis thaliana GN=At2g44510 PE=1 SV=2	--	--	--	--	--	--	--	--	--	--	-	-	-
Unigene0001436	1637	0	0	0	0	gi|359474781|ref|XP_002280163.2|	412	1e-113	PREDICTED: protein BCCIP homolog [Vitis vinifera]	sp|O64885|BCCIP_ARATH	347	1e-94	Protein BCCIP homolog OS=Arabidopsis thaliana GN=At2g44510 PE=1 SV=2	--	--	--	--	--	--	--	--	--	--	-	-	-
Unigene0001437	1469	2	0.0739	2	0.0652	gi|359474781|ref|XP_002280163.2|	412	1e-114	PREDICTED: protein BCCIP homolog [Vitis vinifera]	sp|O64885|BCCIP_ARATH	347	1e-94	Protein BCCIP homolog OS=Arabidopsis thaliana GN=At2g44510 PE=1 SV=2	--	--	--	--	--	--	--	--	--	--	-	-	-
Unigene0001438	1430	0	0	0	0	gi|359474781|ref|XP_002280163.2|	412	1e-114	PREDICTED: protein BCCIP homolog [Vitis vinifera]	sp|O64885|BCCIP_ARATH	347	1e-94	Protein BCCIP homolog OS=Arabidopsis thaliana GN=At2g44510 PE=1 SV=2	--	--	--	--	--	--	--	--	--	--	-	-	-
Unigene0001439	1262	0	0	0	0	gi|359474781|ref|XP_002280163.2|	412	1e-114	PREDICTED: protein BCCIP homolog [Vitis vinifera]	sp|O64885|BCCIP_ARATH	347	8e-95	Protein BCCIP homolog OS=Arabidopsis thaliana GN=At2g44510 PE=1 SV=2	--	--	--	--	--	--	--	--	--	--	-	-	-
Unigene0001440	1577	0	0	0	0	gi|359474781|ref|XP_002280163.2|	412	1e-114	PREDICTED: protein BCCIP homolog [Vitis vinifera]	sp|O64885|BCCIP_ARATH	347	1e-94	Protein BCCIP homolog OS=Arabidopsis thaliana GN=At2g44510 PE=1 SV=2	--	--	--	--	--	--	--	--	--	--	-	-	-
Unigene0001441	1370	0	0	0	0	gi|359474781|ref|XP_002280163.2|	412	1e-114	PREDICTED: protein BCCIP homolog [Vitis vinifera]	sp|O64885|BCCIP_ARATH	347	9e-95	Protein BCCIP homolog OS=Arabidopsis thaliana GN=At2g44510 PE=1 SV=2	--	--	--	--	--	--	--	--	--	--	-	-	-
Unigene0001442	1189	25	1.1409	15	0.6046	gi|508714596|gb|EOY06493.1|	401	1e-110	S-adenosyl-L-methionine-dependent methyltransferases superfamily protein [Theobroma cacao]	sp|Q9Y5N5|HEMK2_HUMAN	164	9e-40	HemK methyltransferase family member 2 OS=Homo sapiens GN=N6AMT1 PE=1 SV=3	SPAC323.05c	102	1e-21	COG2890	Methylase of polypeptide chain release factors	--	--	--	--	--	GO:0008152//metabolic process	GO:0005488//binding;GO:0016741	-
Unigene0001443	220	6	1.4798	1	0.2178	gi|508782571|gb|EOY29827.1|	113	1e-24	Tetratricopeptide repeat-like superfamily protein isoform 5 [Theobroma cacao]	--	--	--	--	--	--	--	--	--	--	--	--	--	--	-	-	-
Unigene0001444	825	89	5.8535	75	4.3564	gi|508719981|gb|EOY11878.1|	177	3e-43	Cation exchanger 2 isoform 2 [Theobroma cacao]	sp|Q8L783|CAX5_ARATH	134	6e-31	Vacuolar cation/proton exchanger 5 OS=Arabidopsis thaliana GN=CAX5 PE=2 SV=1	SPCC1795.02c	49.3	8e-06	COG0387	Ca2+/H+ antiporter	K07300	5e-34	144	vvi:100249832	Ca2+:H+ antiporter	GO:0070838//divalent metal ion transport;GO:0000041//transition metal ion transport	GO:0015368//calcium:cation antiporter activity	GO:0005774//vacuolar membrane
Unigene0001445	1557	0	0	0	0	gi|470108262|ref|XP_004290441.1|	634	1e-180	PREDICTED: alpha-galactosidase-like [Fragaria vesca subsp. vesca]	sp|Q42656|AGAL_COFAR	523	2e-147	Alpha-galactosidase OS=Coffea arabica PE=1 SV=1	--	--	--	--	--	K07407	3e-178	624	rcu:RCOM_1454590	alpha-galactosidase [EC:3.2.1.22]	-	-	-
Unigene0001446	1714	0	0	0	0	gi|508723588|gb|EOY15485.1|	573	1e-162	ZIM-like 1 isoform 1 [Theobroma cacao]	sp|Q8GXL7|GAT24_ARATH	221	1e-56	GATA transcription factor 24 OS=Arabidopsis thaliana GN=GATA24 PE=2 SV=2	--	--	--	--	--	--	--	--	--	--	-	-	-
Unigene0001447	1628	20	0.6666	24	0.7065	gi|508723588|gb|EOY15485.1|	573	1e-162	ZIM-like 1 isoform 1 [Theobroma cacao]	sp|Q8GXL7|GAT24_ARATH	221	1e-56	GATA transcription factor 24 OS=Arabidopsis thaliana GN=GATA24 PE=2 SV=2	--	--	--	--	--	--	--	--	--	--	-	-	-
Unigene0001448	1425	18	0.6854	0	0	gi|225463420|ref|XP_002272204.1|	412	1e-114	PREDICTED: probable purine permease 10-like [Vitis vinifera]	sp|O49726|PUP9_ARATH	378	5e-104	Probable purine permease 9 OS=Arabidopsis thaliana GN=PUP9 PE=2 SV=2	YML038c	50.4	7e-06	COG0697	Permeases of the drug/metabolite transporter (DMT) superfamily	--	--	--	--	--	-	-	-
Unigene0001449	218	7	1.7423	9	1.9784	--	--	--	--	--	--	--	--	--	--	--	--	--	--	--	--	--	--	-	-	-
Unigene0001450	1377	147	5.7925	135	4.6981	gi|470108150|ref|XP_004290393.1|	439	1e-122	PREDICTED: B3 domain-containing transcription factor VRN1-like [Fragaria vesca subsp. vesca]	sp|Q8L3W1|VRN1_ARATH	418	6e-116	B3 domain-containing transcription factor VRN1 OS=Arabidopsis thaliana GN=VRN1 PE=1 SV=1	--	--	--	--	--	--	--	--	--	--	-	-	-
Unigene0001451	957	482	27.3285	509	25.4877	gi|514745652|ref|XP_004960932.1|	161	2e-38	PREDICTED: titin-like [Setaria italica]	--	--	--	--	--	--	--	--	--	--	--	--	--	--	GO:0044237//cellular metabolic process	GO:0046914//transition metal ion binding;GO:0003676//nucleic acid binding;GO:0005515//protein binding	GO:0009521;GO:0031224//intrinsic to membrane
Unigene0001452	206	5	1.317	2	0.4653	--	--	--	--	--	--	--	--	--	--	--	--	--	--	--	--	--	--	-	-	-
Unigene0001453	255	6	1.2767	2	0.3759	--	--	--	--	--	--	--	--	--	--	--	--	--	--	--	--	--	--	-	-	-
Unigene0001454	1466	12	0.4441	0	0	gi|508726533|gb|EOY18430.1|	500	1e-140	RNA-binding family protein with retrovirus zinc finger-like domain isoform 1 [Theobroma cacao]	sp|Q8VYA5|RSZ33_ARATH	349	3e-95	Serine/arginine-rich splicing factor RS2Z33 OS=Arabidopsis thaliana GN=RS2Z33 PE=1 SV=1	SPAC16.02c	80.5	7e-15	COG0724	RNA-binding proteins (RRM domain)	K12896	2e-141	502	vvi:100251921	splicing factor, arginine/serine-rich 7	-	-	-
Unigene0001455	1670	8	0.2599	6	0.1722	gi|508726533|gb|EOY18430.1|	440	1e-122	RNA-binding family protein with retrovirus zinc finger-like domain isoform 1 [Theobroma cacao]	sp|Q8VYA5|RSZ33_ARATH	288	9e-77	Serine/arginine-rich splicing factor RS2Z33 OS=Arabidopsis thaliana GN=RS2Z33 PE=1 SV=1	SPAC16.02c	58.2	4e-08	COG0724	RNA-binding proteins (RRM domain)	K12896	4e-122	438	vvi:100251921	splicing factor, arginine/serine-rich 7	-	GO:0046872//metal ion binding	GO:0043231//intracellular membrane-bounded organelle
Unigene0001456	452	1	0.12	0	0	gi|449451689|ref|XP_004143594.1|	97.1	1e-19	PREDICTED: serine/arginine-rich splicing factor RS2Z32-like isoform 1 [Cucumis sativus]	sp|Q8VYA5|RSZ33_ARATH	91.7	2e-18	Serine/arginine-rich splicing factor RS2Z33 OS=Arabidopsis thaliana GN=RS2Z33 PE=1 SV=1	--	--	--	--	--	K12896	4e-19	93.2	vvi:100251921	splicing factor, arginine/serine-rich 7	-	GO:0036094;GO:0046914//transition metal ion binding	-
Unigene0001457	477	102	11.6028	83	8.3384	gi|449451689|ref|XP_004143594.1|	97.1	1e-19	PREDICTED: serine/arginine-rich splicing factor RS2Z32-like isoform 1 [Cucumis sativus]	sp|Q8VYA5|RSZ33_ARATH	91.7	2e-18	Serine/arginine-rich splicing factor RS2Z33 OS=Arabidopsis thaliana GN=RS2Z33 PE=1 SV=1	--	--	--	--	--	K12896	5e-19	93.2	vvi:100251921	splicing factor, arginine/serine-rich 7	-	GO:0036094;GO:0046914//transition metal ion binding	-
Unigene0001458	311	8	1.3958	3	0.4623	--	--	--	--	--	--	--	--	--	--	--	--	--	--	--	--	--	--	-	-	-
Unigene0001459	441	12	1.4765	10	1.0866	gi|484847896|gb|AGK62447.1|	123	1e-27	cycloartenol synthase [Panax quinquefolius]	sp|O82139|CAS1_PANGI	124	2e-28	Cycloartenol Synthase OS=Panax ginseng GN=OSCPNX1 PE=1 SV=1	--	--	--	--	--	K01853	5e-26	115	ath:AT2G07050	cycloartenol synthase [EC:5.4.99.8]	GO:0016104//triterpenoid biosynthetic process;GO:0009668;GO:0048229//gametophyte development;GO:0006355//regulation of transcription, DNA-dependent	GO:0031559//oxidosqualene cyclase activity	GO:0043231//intracellular membrane-bounded organelle
Unigene0001460	1128	16	0.7696	18	0.7647	gi|15231059|ref|NP_190752.1|	410	1e-113	acyl-coenzyme A oxidase 4 [Arabidopsis thaliana]	sp|Q96329|ACOX4_ARATH	410	1e-113	Acyl-coenzyme A oxidase 4, peroxisomal OS=Arabidopsis thaliana GN=ACX4 PE=1 SV=1	DR0551	192	7e-49	COG1960	Acyl-CoA dehydrogenases	K00232	8e-114	410	ath:AT3G51840	acyl-CoA oxidase [EC:1.3.3.6]	-	-	-
Unigene0001461	202	6	1.6117	2	0.4745	gi|358349482|ref|XP_003638765.1|	49.3	6e-08	Regulator of nonsense transcripts-like protein [Medicago truncatula]	--	--	--	--	--	--	--	--	--	--	--	--	--	--	-	GO:0005488//binding	-
Unigene0001462	219	2	0.4955	0	0	--	--	--	--	--	--	--	--	--	--	--	--	--	--	--	--	--	--	-	-	-
Unigene0001463	551	26	2.5604	10	0.8697	gi|359480441|ref|XP_003632462.1|	126	3e-28	PREDICTED: upstream activation factor subunit spp27-like [Vitis vinifera]	sp|Q19753|YU0O_CAEEL	50.1	9e-06	Uncharacterized protein F23B12.7 OS=Caenorhabditis elegans GN=F23B12.7 PE=3 SV=1	--	--	--	--	--	--	--	--	--	--	-	-	-
Unigene0001464	1226	16	0.7081	9	0.3518	gi|502160961|ref|XP_004511971.1|	355	1e-96	PREDICTED: upstream activation factor subunit spp27-like [Cicer arietinum]	sp|O74503|UAF30_SCHPO	95.9	5e-19	Upstream activation factor subunit spp27 OS=Schizosaccharomyces pombe (strain 972 / ATCC 24843) GN=spp27 PE=1 SV=1	SPCC285.17	95.9	1e-19	COG5531	SWIB-domain-containing proteins implicated in chromatin remodeling	--	--	--	--	--	-	-	-
Unigene0001465	1874	116	3.3587	85	2.1736	gi|508724297|gb|EOY16194.1|	764	0	SET domain protein isoform 2 [Theobroma cacao]	sp|Q7XJS0|ASHR1_ARATH	658	0	Histone-lysine N-methyltransferase ASHR1 OS=Arabidopsis thaliana GN=ASHR1 PE=2 SV=2	SPBP8B7.07c	119	2e-26	COG2940	Proteins containing SET domain	K11426	0	791	rcu:RCOM_1032380	SET and MYND domain-containing protein	GO:0008152//metabolic process	GO:0016741;GO:0046914//transition metal ion binding	-
Unigene0001466	773	8	0.5616	1	0.062	gi|470143039|ref|XP_004307195.1|	266	4e-70	PREDICTED: THO complex subunit 1-like [Fragaria vesca subsp. vesca]	--	--	--	--	--	--	--	--	--	K12878	2e-70	265	rcu:RCOM_1264550	THO complex subunit 1	GO:0006952//defense response;GO:0006405//RNA export from nucleus;GO:0030422//production of siRNA involved in RNA interference	-	GO:0043231//intracellular membrane-bounded organelle
Unigene0001467	269	9	1.8154	2	0.3563	gi|357518875|ref|XP_003629726.1|	58.5	4e-08	Pheophorbide a oxygenase [Medicago truncatula]	sp|Q8W496|PTC52_ARATH	53.9	3e-07	Protochlorophyllide-dependent translocon component 52, chloroplastic OS=Arabidopsis thaliana GN=PTC52 PE=2 SV=1	--	--	--	--	--	--	--	--	--	--	-	-	-
Unigene0001468	289	11	2.0653	1	0.1658	gi|359478456|ref|XP_002283592.2|	156	2e-37	PREDICTED: protochlorophyllide-dependent translocon component 52, chloroplastic-like [Vitis vinifera]	sp|Q8W496|PTC52_ARATH	134	2e-31	Protochlorophyllide-dependent translocon component 52, chloroplastic OS=Arabidopsis thaliana GN=PTC52 PE=2 SV=1	alr4354	64.7	4e-11	COG4638	Phenylpropionate dioxygenase and related ring-hydroxylating dioxygenases, large terminal subunit	--	--	--	--	--	GO:0008152//metabolic process	GO:0016703;GO:0043169//cation binding;GO:0051536//iron-sulfur cluster binding	GO:0009526//plastid envelope
Unigene0001469	433	13	1.6291	8	0.8854	gi|508785039|gb|EOY32295.1|	170	1e-41	ACD1-like [Theobroma cacao]	sp|Q8W496|PTC52_ARATH	139	6e-33	Protochlorophyllide-dependent translocon component 52, chloroplastic OS=Arabidopsis thaliana GN=PTC52 PE=2 SV=1	alr4354	48.1	5e-06	COG4638	Phenylpropionate dioxygenase and related ring-hydroxylating dioxygenases, large terminal subunit	--	--	--	--	--	-	GO:0005488//binding	GO:0009526//plastid envelope
Unigene0001470	708	20	1.5328	4	0.2707	gi|508785039|gb|EOY32295.1|	310	2e-83	ACD1-like [Theobroma cacao]	sp|Q8W496|PTC52_ARATH	282	1e-75	Protochlorophyllide-dependent translocon component 52, chloroplastic OS=Arabidopsis thaliana GN=PTC52 PE=2 SV=1	alr4354	85.5	8e-17	COG4638	Phenylpropionate dioxygenase and related ring-hydroxylating dioxygenases, large terminal subunit	--	--	--	--	--	-	GO:0016491//oxidoreductase activity;GO:0051536//iron-sulfur cluster binding	GO:0009526//plastid envelope
Unigene0001471	1089	13	0.6477	14	0.6161	--	--	--	--	--	--	--	--	--	--	--	--	--	--	--	--	--	--	-	-	-
Unigene0001472	329	5	0.8246	1	0.1457	--	--	--	--	--	--	--	--	--	--	--	--	--	--	--	--	--	--	-	-	-
Unigene0001473	210	3	0.7751	1	0.2282	--	--	--	--	--	--	--	--	--	--	--	--	--	--	--	--	--	--	-	-	-
Unigene0001474	279	9	1.7503	3	0.5153	--	--	--	--	--	--	--	--	--	--	--	--	--	--	--	--	--	--	-	-	-
Unigene0001475	209	5	1.2981	2	0.4586	gi|224132258|ref|XP_002328224.1|	50.8	8e-10	cc-nbs-lrr resistance protein [Populus trichocarpa]	--	--	--	--	--	--	--	--	--	--	--	--	--	--	-	GO:0016787//hydrolase activity	-
Unigene0001476	741	6	0.4394	0	0	gi|449523141|ref|XP_004168583.1|	58.9	1e-07	PREDICTED: uncharacterized LOC101219428 [Cucumis sativus]	sp|Q8MP30|Y7791_DICDI	56.6	2e-07	Uncharacterized histidine-rich protein DDB_G0274557 OS=Dictyostelium discoideum GN=DDB_G0274557 PE=4 SV=1	--	--	--	--	--	--	--	--	--	--	-	-	-
Unigene0001477	948	25	1.4309	11	0.556	gi|224132258|ref|XP_002328224.1|	310	2e-83	cc-nbs-lrr resistance protein [Populus trichocarpa]	sp|Q7XBQ9|RGA2_SOLBU	226	2e-58	Disease resistance protein RGA2 OS=Solanum bulbocastanum GN=RGA2 PE=1 SV=1	--	--	--	--	--	--	--	--	--	--	-	-	-
Unigene0001478	735	1	0.0738	0	0	gi|449523141|ref|XP_004168583.1|	66.2	7e-10	PREDICTED: uncharacterized LOC101219428 [Cucumis sativus]	sp|Q8MP30|Y7791_DICDI	53.9	1e-06	Uncharacterized histidine-rich protein DDB_G0274557 OS=Dictyostelium discoideum GN=DDB_G0274557 PE=4 SV=1	--	--	--	--	--	--	--	--	--	--	-	-	-
Unigene0001479	1107	11	0.5392	4	0.1732	gi|284026888|gb|ADB66335.1|	369	1e-101	CC-NBS-LRR protein [Quercus suber]	sp|Q7XBQ9|RGA2_SOLBU	219	3e-56	Disease resistance protein RGA2 OS=Solanum bulbocastanum GN=RGA2 PE=1 SV=1	--	--	--	--	--	--	--	--	--	--	-	-	-
Unigene0001480	831	0	0	0	0	gi|449523141|ref|XP_004168583.1|	66.2	9e-10	PREDICTED: uncharacterized LOC101219428 [Cucumis sativus]	sp|Q8MP30|Y7791_DICDI	53.9	1e-06	Uncharacterized histidine-rich protein DDB_G0274557 OS=Dictyostelium discoideum GN=DDB_G0274557 PE=4 SV=1	--	--	--	--	--	--	--	--	--	--	-	-	-
Unigene0001481	1739	0	0	0	0	gi|508786368|gb|EOY33624.1|	584	1e-165	Argonaute protein group [Theobroma cacao]	sp|Q9SJK3|AGO5_ARATH	506	2e-142	Protein argonaute 5 OS=Arabidopsis thaliana GN=AGO5 PE=1 SV=2	--	--	--	--	--	K11596	1e-142	506	ath:AT2G27880	argonaute	-	-	-
Unigene0001482	3060	0	0	0	0	gi|359479401|ref|XP_002271699.2|	1302	0	PREDICTED: LOW QUALITY PROTEIN: protein argonaute 5-like [Vitis vinifera]	sp|Q9SJK3|AGO5_ARATH	1146	0	Protein argonaute 5 OS=Arabidopsis thaliana GN=AGO5 PE=1 SV=2	--	--	--	--	--	K11596	0	1146	ath:AT2G27880	argonaute	GO:0007126//meiosis;GO:0070076//histone lysine demethylation;GO:0032502//developmental process	GO:0008135//translation factor activity, nucleic acid binding	GO:0030874//nucleolar chromatin
Unigene0001483	907	0	0	0	0	gi|21322711|emb|CAD22154.1|	350	6e-96	pherophorin-dz1 protein [Volvox carteri f. nagariensis]	sp|P27483|GRP1_ARATH	298	5e-80	Glycine-rich cell wall structural protein OS=Arabidopsis thaliana GN=At3g17050 PE=4 SV=2	XF0818	176	4e-44	COG2730	Endoglucanase	--	--	--	--	--	-	-	GO:0031410//cytoplasmic vesicle
Unigene0001484	1752	0	0	0	0	gi|508786368|gb|EOY33624.1|	607	1e-172	Argonaute protein group [Theobroma cacao]	sp|Q9SJK3|AGO5_ARATH	529	3e-149	Protein argonaute 5 OS=Arabidopsis thaliana GN=AGO5 PE=1 SV=2	--	--	--	--	--	K11596	2e-149	529	ath:AT2G27880	argonaute	-	-	-
Unigene0001485	2104	225	5.8025	244	5.5574	gi|317106757|dbj|BAJ53251.1|	525	1e-155	JHL25H03.15 [Jatropha curcas]	sp|Q8BU03|PWP2_MOUSE	287	3e-76	Periodic tryptophan protein 2 homolog OS=Mus musculus GN=Pwp2 PE=1 SV=1	all0283_3	88.6	1e-18	COG2319	FOG: WD40 repeat	K14558	3e-158	529	pop:POPTR_817077	periodic tryptophan protein 2	-	-	-
Unigene0001486	3255	732	12.2023	963	14.1775	gi|508784631|gb|EOY31887.1|	1230	0	P450 reductase 2 [Theobroma cacao]	sp|Q05001|NCPR_CATRO	1117	0	NADPH--cytochrome P450 reductase OS=Catharanthus roseus GN=CPR PE=2 SV=1	SPBC365.17	281	5e-75	COG0369	Sulfite reductase, alpha subunit (flavoprotein)	K00327	0	1191	vvi:100240979	NADPH-ferrihemoprotein reductase [EC:1.6.2.4]	GO:0006725//cellular aromatic compound metabolic process	GO:0046914//transition metal ion binding;GO:0016653//oxidoreductase activity, acting on NADH or NADPH, heme protein as acceptor;GO:0000166//nucleotide binding	GO:0031090//organelle membrane;GO:0043231//intracellular membrane-bounded organelle
Unigene0001487	759	3136	224.19	4784	302.047	gi|18394220|ref|NP_563969.1|	120	4e-26	translation machinery associated protein TMA7 [Arabidopsis thaliana]	sp|Q60QR6|TMA7_CAEBR	77	1e-13	Translation machinery-associated protein 7 homolog OS=Caenorhabditis briggsae GN=CBG21705 PE=3 SV=1	--	--	--	--	--	--	--	--	--	--	-	-	GO:0016020//membrane
Unigene0001488	2156	0	0	0	0	gi|508776675|gb|EOY23931.1|	577	0	No lysine kinase 10 isoform 1 [Theobroma cacao]	sp|Q944Q0|WNK8_ARATH	474	6e-136	Serine/threonine-protein kinase WNK8 OS=Arabidopsis thaliana GN=WNK8 PE=1 SV=1	YAR019c	94.7	6e-19	COG0515	Serine/threonine protein kinase	--	--	--	--	--	GO:0050896//response to stimulus;GO:0006468//protein phosphorylation;GO:0009791//post-embryonic development;GO:0050794//regulation of cellular process;GO:0048608//reproductive structure development	GO:0004674//protein serine/threonine kinase activity	-
Unigene0001489	2194	0	0	6	0.1311	gi|508776675|gb|EOY23931.1|	624	0	No lysine kinase 10 isoform 1 [Theobroma cacao]	sp|Q944Q0|WNK8_ARATH	525	6e-148	Serine/threonine-protein kinase WNK8 OS=Arabidopsis thaliana GN=WNK8 PE=1 SV=1	YAR019c	104	6e-22	COG0515	Serine/threonine protein kinase	--	--	--	--	--	GO:0050896//response to stimulus;GO:0006468//protein phosphorylation;GO:0009791//post-embryonic development;GO:0050794//regulation of cellular process;GO:0048608//reproductive structure development	GO:0004674//protein serine/threonine kinase activity	-
Unigene0001490	2792	46	0.894	34	0.5836	gi|356558067|ref|XP_003547330.1|	676	0	PREDICTED: protein KRI1 homolog [Glycine max]	sp|Q6DRJ4|KRI1_DANRE	278	2e-73	Protein KRI1 homolog OS=Danio rerio GN=kri1 PE=2 SV=1	aq_1006	72	5e-12	COG0419	ATPase involved in DNA repair	K14786	0	717	pop:POPTR_826683	protein KRI1	-	-	-
Unigene0001491	229	2	0.4739	5	1.0463	--	--	--	--	--	--	--	--	--	--	--	--	--	--	--	--	--	--	-	-	-
Unigene0001492	222	3	0.7332	1	0.2159	--	--	--	--	--	--	--	--	--	--	--	--	--	--	--	--	--	--	-	-	-
Unigene0001493	246	16	3.5291	9	1.7532	gi|470111849|ref|XP_004292155.1|	123	1e-27	PREDICTED: TMV resistance protein N-like [Fragaria vesca subsp. vesca]	sp|Q40392|TMVRN_NICGU	93.6	4e-19	TMV resistance protein N OS=Nicotiana glutinosa GN=N PE=1 SV=1	--	--	--	--	--	--	--	--	--	--	GO:0006950//response to stress;GO:0050794//regulation of cellular process	GO:0032559	GO:0044464//cell part
Unigene0001494	545	28	2.7877	17	1.4948	gi|392522154|gb|AFM77946.1|	235	3e-61	NBS-LRR disease resistance protein NBS17, partial [Dimocarpus longan]	sp|Q40392|TMVRN_NICGU	125	2e-28	TMV resistance protein N OS=Nicotiana glutinosa GN=N PE=1 SV=1	--	--	--	--	--	--	--	--	--	--	GO:0050896//response to stimulus	GO:0032559	-
Unigene0001495	507	9	0.9632	5	0.4726	--	--	--	--	--	--	--	--	--	--	--	--	--	--	--	--	--	--	-	-	-
Unigene0001496	264	4	0.8221	3	0.5446	--	--	--	--	--	--	--	--	--	--	--	--	--	--	--	--	--	--	-	-	-
Unigene0001497	210	7	1.8087	2	0.4564	gi|359478621|ref|XP_002274420.2|	125	3e-28	PREDICTED: UDP-glycosyltransferase 87A2-like [Vitis vinifera]	sp|O64733|U87A2_ARATH	102	8e-22	UDP-glycosyltransferase 87A2 OS=Arabidopsis thaliana GN=UGT87A2 PE=2 SV=1	--	--	--	--	--	--	--	--	--	--	-	GO:0035251//UDP-glucosyltransferase activity	-
Unigene0001498	240	12	2.713	1	0.1997	gi|359478621|ref|XP_002274420.2|	103	2e-21	PREDICTED: UDP-glycosyltransferase 87A2-like [Vitis vinifera]	sp|O64732|U87A1_ARATH	72.4	8e-13	UDP-glycosyltransferase 87A1 OS=Arabidopsis thaliana GN=UGT87A1 PE=2 SV=1	--	--	--	--	--	--	--	--	--	--	-	GO:0035251//UDP-glucosyltransferase activity	-
Unigene0001499	2313	15	0.3519	1	0.0207	gi|359478519|ref|XP_002274566.2|	550	1e-155	PREDICTED: UDP-glycosyltransferase 87A2-like [Vitis vinifera]	sp|O64733|U87A2_ARATH	437	1e-121	UDP-glycosyltransferase 87A2 OS=Arabidopsis thaliana GN=UGT87A2 PE=2 SV=1	--	--	--	--	--	--	--	--	--	--	-	-	-
Unigene0001500	489	251	27.8513	152	14.8957	--	--	--	--	--	--	--	--	--	--	--	--	--	--	--	--	--	--	-	-	-
Unigene0001501	226	2	0.4802	0	0	--	--	--	--	--	--	--	--	--	--	--	--	--	--	--	--	--	--	-	-	-
Unigene0001502	279	5	0.9724	2	0.3435	--	--	--	--	--	--	--	--	--	--	--	--	--	--	--	--	--	--	-	-	-
Unigene0001503	786	16	1.1045	8	0.4877	gi|449525323|ref|XP_004169667.1|	151	2e-35	PREDICTED: trihelix transcription factor GT-2-like [Cucumis sativus]	sp|Q39117|TGT2_ARATH	97.8	7e-20	Trihelix transcription factor GT-2 OS=Arabidopsis thaliana GN=GT-2 PE=2 SV=1	--	--	--	--	--	--	--	--	--	--	-	-	-
Unigene0001504	684	3822	303.191	1997	139.909	gi|7024451|dbj|BAA92156.1|	213	3e-54	glycine-rich RNA-binding protein [Citrus unshiu]	sp|Q03250|RBG7_ARATH	186	2e-46	Glycine-rich RNA-binding protein 7 OS=Arabidopsis thaliana GN=RBG7 PE=1 SV=1	XF0818	73.2	4e-13	COG2730	Endoglucanase	K13195	1e-49	195	pop:POPTR_712972	cold-inducible RNA-binding protein	GO:0006952//defense response;GO:0016070//RNA metabolic process;GO:0010038//response to metal ion;GO:0009725//response to hormone stimulus;GO:0048511//rhythmic process;GO:0006405//RNA export from nucleus;GO:0006970//response to osmotic stress;GO:0032392//DNA geometric change;GO:0050794//regulation of cellular process;GO:0003006//developmental process involved in reproduction	GO:0036094;GO:0043566//structure-specific DNA binding	GO:0030312//external encapsulating structure;GO:0009536//plastid;GO:0043232;GO:0042579//microbody;GO:0016020//membrane
Unigene0001505	1209	40	1.7952	14	0.5549	gi|508777325|gb|EOY24581.1|	256	1e-66	Non-yellowing 1 isoform 1 [Theobroma cacao]	--	--	--	--	--	--	--	--	--	--	--	--	--	--	-	-	-
Unigene0001506	279	4	0.7779	2	0.3435	--	--	--	--	--	--	--	--	--	--	--	--	--	--	--	--	--	--	-	-	-
Unigene0001507	1134	0	0	0	0	--	--	--	--	--	--	--	--	--	--	--	--	--	--	--	--	--	--	-	-	-
Unigene0001508	1181	10	0.4594	1	0.0406	--	--	--	--	--	--	--	--	--	--	--	--	--	--	--	--	--	--	-	-	-
Unigene0001509	346	0	0	1	0.1385	--	--	--	--	--	--	--	--	--	--	--	--	--	--	--	--	--	--	-	-	-
Unigene0001510	753	4	0.2882	0	0	--	--	--	--	--	--	--	--	--	--	--	--	--	--	--	--	--	--	-	-	-
Unigene0001511	562	12	1.1586	1	0.0853	--	--	--	--	--	--	--	--	--	--	--	--	--	--	--	--	--	--	-	-	-
Unigene0001512	678	6	0.4802	0	0	--	--	--	--	--	--	--	--	--	--	--	--	--	--	--	--	--	--	-	-	-
Unigene0001513	1319	19	0.7816	12	0.436	gi|508784370|gb|EOY31626.1|	430	1e-119	Cyclic nucleotide-gated channel 17 isoform 2 [Theobroma cacao]	sp|Q8L7Z0|CNG17_ARATH	383	2e-105	Probable cyclic nucleotide-gated ion channel 17 OS=Arabidopsis thaliana GN=CNGC17 PE=2 SV=1	--	--	--	--	--	--	--	--	--	--	-	-	-
Unigene0001514	251	8	1.7294	2	0.3818	--	--	--	--	--	--	--	--	--	--	--	--	--	--	--	--	--	--	-	-	-
Unigene0001515	956	29	1.646	26	1.3033	gi|449498859|ref|XP_004160654.1|	63.5	7e-09	PREDICTED: uncharacterized LOC101213851 [Cucumis sativus]	--	--	--	--	--	--	--	--	--	--	--	--	--	--	-	-	-
Unigene0001516	394	8	1.1017	3	0.3649	gi|357515439|ref|XP_003628008.1|	65.1	5e-10	HAT family dimerization domain containing protein [Medicago truncatula]	--	--	--	--	--	--	--	--	--	--	--	--	--	--	-	GO:0005488//binding	-
Unigene0001517	297	8	1.4616	2	0.3227	--	--	--	--	--	--	--	--	--	--	--	--	--	--	--	--	--	--	-	-	-
Unigene0001518	368	1	0.1474	0	0	--	--	--	--	--	--	--	--	--	--	--	--	--	--	--	--	--	--	-	-	-
Unigene0001519	638	31	2.6365	1	0.0751	--	--	--	--	--	--	--	--	--	--	--	--	--	--	--	--	--	--	-	-	-
Unigene0001520	224	3	0.7267	2	0.4279	--	--	--	--	--	--	--	--	--	--	--	--	--	--	--	--	--	--	-	-	-
Unigene0001521	236	0	0	0	0	--	--	--	--	--	--	--	--	--	--	--	--	--	--	--	--	--	--	-	-	-
Unigene0001522	278	4	0.7807	2	0.3448	gi|224113515|ref|XP_002316517.1|	88.2	5e-17	DNA glycosylase [Populus trichocarpa]	sp|Q8LK56|DME_ARATH	81.3	2e-15	Transcriptional activator DEMETER OS=Arabidopsis thaliana GN=DME PE=1 SV=2	--	--	--	--	--	--	--	--	--	--	GO:0006305;GO:0040029//regulation of gene expression, epigenetic;GO:0003006//developmental process involved in reproduction	GO:0016835//carbon-oxygen lyase activity;GO:0016799//hydrolase activity, hydrolyzing N-glycosyl compounds	GO:0043076
Unigene0001523	430	11	1.3881	3	0.3343	--	--	--	--	--	--	--	--	--	--	--	--	--	--	--	--	--	--	-	-	-
Unigene0001524	1995	47	1.2783	71	1.7055	gi|508783635|gb|EOY30891.1|	848	0	DNAJ heat shock N-terminal domain-containing protein isoform 1 [Theobroma cacao]	sp|F4IVL6|GRV2_ARATH	738	0	DnaJ homolog subfamily C GRV2 OS=Arabidopsis thaliana GN=GRV2 PE=1 SV=1	slr0599	55.5	3e-07	COG0515	Serine/threonine protein kinase	K09533	0	841	vvi:100262770	DnaJ homolog subfamily C member 13	GO:0006605//protein targeting;GO:0009657//plastid organization;GO:0009630//gravitropism;GO:0003006//developmental process involved in reproduction;GO:0006950//response to stress	GO:0005515//protein binding	GO:0005768//endosome;GO:0031090//organelle membrane;GO:0044431//Golgi apparatus part;GO:0042598//vesicular fraction
Unigene0001525	824	44	2.8974	14	0.8142	gi|482679560|gb|AGK29988.1|	349	4e-95	3-ketoacyl-CoA synthase 1 [Gossypium raimondii]	sp|Q9FG87|KCS19_ARATH	295	3e-79	3-ketoacyl-CoA synthase 19 OS=Arabidopsis thaliana GN=KCS19 PE=2 SV=1	--	--	--	--	--	--	--	--	--	--	GO:0009314//response to radiation;GO:0006950//response to stress;GO:0006631//fatty acid metabolic process	GO:0004312//fatty acid synthase activity	-
Unigene0001526	289	9	1.6898	1	0.1658	gi|482679560|gb|AGK29988.1|	172	2e-42	3-ketoacyl-CoA synthase 1 [Gossypium raimondii]	sp|Q5XEP9|KCS17_ARATH	165	7e-41	3-ketoacyl-CoA synthase 17 OS=Arabidopsis thaliana GN=KCS17 PE=2 SV=2	--	--	--	--	--	--	--	--	--	--	GO:0009314//response to radiation;GO:0006950//response to stress;GO:0006631//fatty acid metabolic process	GO:0004312//fatty acid synthase activity	-
Unigene0001527	508	40	4.2725	10	0.9433	gi|508699707|gb|EOX91603.1|	216	2e-55	Transducin family protein / WD-40 repeat family protein isoform 2 [Theobroma cacao]	--	--	--	--	--	--	--	--	--	--	--	--	--	--	-	-	-
Unigene0001528	1271	69	2.9457	40	1.5081	gi|359481536|ref|XP_002276374.2|	516	1e-145	PREDICTED: extended synaptotagmin-2-like [Vitis vinifera]	sp|Q7XA06|SYT3_ARATH	442	3e-123	Synaptotagmin-3 OS=Arabidopsis thaliana GN=SYT3 PE=2 SV=1	YNL087w	99	2e-20	COG5038	Ca2+-dependent lipid-binding protein, contains C2 domain	--	--	--	--	--	-	-	-
Unigene0001529	749	18	1.304	9	0.5758	gi|359489796|ref|XP_003633980.1|	86.3	7e-16	PREDICTED: disease susceptibility protein LOV1-like [Vitis vinifera]	sp|P59584|RP8HA_ARATH	65.9	3e-10	Disease resistance protein RPH8A OS=Arabidopsis thaliana GN=RPH8A PE=2 SV=1	--	--	--	--	--	--	--	--	--	--	-	-	-
Unigene0001530	592	43	3.9412	17	1.3761	gi|227438185|gb|ACP30582.1|	138	7e-32	disease resistance protein [Brassica rapa subsp. pekinensis]	sp|Q9M667|RPP13_ARATH	127	7e-29	Disease resistance protein RPP13 OS=Arabidopsis thaliana GN=RPP13 PE=2 SV=2	--	--	--	--	--	--	--	--	--	--	-	-	-
Unigene0001531	2624	20	0.4136	6	0.1096	gi|449455188|ref|XP_004145335.1|	662	0	PREDICTED: uncharacterized LOC101207144 [Cucumis sativus]	sp|Q55AX2|DOT1L_DICDI	67.8	4e-10	Histone-lysine N-methyltransferase, H3 lysine-79 specific OS=Dictyostelium discoideum GN=dotA PE=2 SV=2	aq_629	61.2	9e-09	COG1196	Chromosome segregation ATPases	--	--	--	--	--	-	-	-
Unigene0001532	2279	1	0.0238	2	0.0421	gi|508711132|gb|EOY03029.1|	834	0	Eukaryotic release factor 1-3 [Theobroma cacao]	sp|P35614|ERF1Z_ARATH	797	0	Eukaryotic peptide chain release factor subunit 1-3 OS=Arabidopsis thaliana GN=ERF1-3 PE=2 SV=1	YBR143c	587	4e-167	COG1503	Peptide chain release factor 1 (eRF1)	K03265	0	823	pop:POPTR_732023	peptide chain release factor subunit 1	GO:0043624//cellular protein complex disassembly	GO:0003747//translation release factor activity	GO:0016020//membrane;GO:0044424//intracellular part
Unigene0001533	1945	174	4.8541	10	0.2464	gi|374087946|gb|AEY82696.1|	722	0	(3S)-linalool/(E)-nerolidol synthase [Vitis vinifera]	sp|P0CV95|NES2_FRAAN	661	0	(3S,6E)-nerolidol synthase 2, chloroplastic/mitochondrial OS=Fragaria ananassa PE=1 SV=1	--	--	--	--	--	K15086	0	719	vvi:100256887	(3S)-linalool synthase [EC:4.2.3.25]	GO:0043692	GO:0046872//metal ion binding;GO:0016838//carbon-oxygen lyase activity, acting on phosphates	-
Unigene0001534	774	12	0.8412	10	0.6191	gi|508708231|gb|EOY00128.1|	418	1e-116	Endonuclease 2, 2 isoform 1 [Theobroma cacao]	sp|Q9C9G4|ENDO2_ARATH	390	4e-108	Endonuclease 2 OS=Arabidopsis thaliana GN=ENDO2 PE=2 SV=1	--	--	--	--	--	--	--	--	--	--	GO:0006259//DNA metabolic process	GO:0005488//binding;GO:0004518//nuclease activity	-
Unigene0001535	389	5	0.6974	0	0	gi|470126169|ref|XP_004299065.1|	177	6e-44	PREDICTED: endonuclease 2-like [Fragaria vesca subsp. vesca]	sp|Q9C9G4|ENDO2_ARATH	166	4e-41	Endonuclease 2 OS=Arabidopsis thaliana GN=ENDO2 PE=2 SV=1	--	--	--	--	--	--	--	--	--	--	GO:0006259//DNA metabolic process	GO:0004520//endodeoxyribonuclease activity;GO:0005488//binding	-
Unigene0001536	205	5	1.3234	4	0.935	gi|449434608|ref|XP_004135088.1|	97.4	9e-20	PREDICTED: endonuclease 2-like [Cucumis sativus]	sp|Q9C9G4|ENDO2_ARATH	80.9	2e-15	Endonuclease 2 OS=Arabidopsis thaliana GN=ENDO2 PE=2 SV=1	--	--	--	--	--	--	--	--	--	--	GO:0006259//DNA metabolic process	GO:0004520//endodeoxyribonuclease activity;GO:0005488//binding	-
Unigene0001537	1365	9	0.3578	20	0.7021	gi|526117956|ref|NP_001267901.1|	384	1e-105	calcineurin B-like protein 01 [Vitis vinifera]	sp|O81445|CNBL1_ARATH	366	2e-100	Calcineurin B-like protein 1 OS=Arabidopsis thaliana GN=CBL1 PE=1 SV=3	YKL190w	79.3	1e-14	COG5126	Ca2+-binding protein (EF-Hand superfamily)	K06268	5e-106	384	vvi:100260894	protein phosphatase 3, regulatory subunit	-	-	-
Unigene0001538	264	5	1.0277	1	0.1815	--	--	--	--	--	--	--	--	--	--	--	--	--	--	--	--	--	--	-	-	-
Unigene0001539	1444	28	1.0521	54	1.7921	gi|526117956|ref|NP_001267901.1|	384	1e-105	calcineurin B-like protein 01 [Vitis vinifera]	sp|O81445|CNBL1_ARATH	366	2e-100	Calcineurin B-like protein 1 OS=Arabidopsis thaliana GN=CBL1 PE=1 SV=3	YKL190w	79.3	2e-14	COG5126	Ca2+-binding protein (EF-Hand superfamily)	K06268	5e-106	384	vvi:100260894	protein phosphatase 3, regulatory subunit	-	-	-
Unigene0001540	477	0	0	0	0	--	--	--	--	--	--	--	--	--	--	--	--	--	--	--	--	--	--	-	-	-
Unigene0001541	1960	6	0.1661	15	0.3667	gi|1087073|gb|AAB34987.1|	708	0	calmodulin-binding heat-shock protein [Nicotiana tabacum]	sp|Q91WC9|DGLB_MOUSE	59.3	1e-07	Sn1-specific diacylglycerol lipase beta OS=Mus musculus GN=Daglb PE=1 SV=2	--	--	--	--	--	--	--	--	--	--	GO:0006629//lipid metabolic process	GO:0005515//protein binding;GO:0052689;GO:0016298//lipase activity	GO:0016020//membrane
Unigene0001542	259	9	1.8855	5	0.9251	gi|297837107|ref|XP_002886435.1|	63.2	2e-09	hypothetical protein ARALYDRAFT_338073 [Arabidopsis lyrata subsp. lyrata]	--	--	--	--	--	--	--	--	--	--	--	--	--	--	-	-	-
Unigene0001543	344	10	1.5773	8	1.1144	--	--	--	--	--	--	--	--	--	--	--	--	--	--	--	--	--	--	-	-	-
Unigene0001544	360	10	1.5072	6	0.7987	--	--	--	--	--	--	--	--	--	--	--	--	--	--	--	--	--	--	-	-	-
Unigene0001545	496	35	3.8288	7	0.6763	gi|508727853|gb|EOY19750.1|	67	2e-10	NB-ARC domain-containing disease resistance protein [Theobroma cacao]	--	--	--	--	--	--	--	--	--	--	--	--	--	--	-	GO:0003824//catalytic activity	-
Unigene0001546	1310	109	4.5148	156	5.7066	gi|118481297|gb|ABK92592.1|	194	7e-58	unknown [Populus trichocarpa]	--	--	--	--	--	--	--	--	--	--	--	--	--	--	-	GO:0046914//transition metal ion binding	-
Unigene0001547	782	325	22.5506	150	9.192	gi|460374869|ref|XP_004233231.1|	229	7e-59	PREDICTED: protein PHLOEM PROTEIN 2-LIKE A1-like [Solanum lycopersicum]	sp|O81865|P2A01_ARATH	176	1e-43	Protein PHLOEM PROTEIN 2-LIKE A1 OS=Arabidopsis thaliana GN=PP2A1 PE=2 SV=1	--	--	--	--	--	--	--	--	--	--	GO:0051707//response to other organism	GO:0001948//glycoprotein binding	-
Unigene0001548	338	6	0.9632	3	0.4253	--	--	--	--	--	--	--	--	--	--	--	--	--	K12604	4e-06	49.7	pop:POPTR_816550	CCR4-NOT transcription complex subunit 1	-	-	-
Unigene0001549	2471	10	0.2196	8	0.1551	gi|470142543|ref|XP_004306964.1|	1089	0	PREDICTED: CCR4-NOT transcription complex subunit 1-like [Fragaria vesca subsp. vesca]	sp|A1A5H6|CNOT1_DANRE	209	6e-53	CCR4-NOT transcription complex subunit 1 OS=Danio rerio GN=cnot1 PE=2 SV=1	SPAC20G8.06	114	6e-25	COG5103	Cell division control protein, negative regulator of transcription	K12604	0	1095	pop:POPTR_816550	CCR4-NOT transcription complex subunit 1	-	-	-
Unigene0001550	249	27	5.8836	23	4.4264	gi|79325179|ref|NP_001031674.1|	94.4	7e-19	plastid transcriptionally active 9 [Arabidopsis thaliana]	sp|Q8GXH3|OSB2_ARATH	94.4	2e-19	Protein OSB2, chloroplastic OS=Arabidopsis thaliana GN=OSB2 PE=1 SV=2	--	--	--	--	--	--	--	--	--	--	-	-	GO:0000229
Unigene0001551	1746	10	0.3108	16	0.4391	gi|115463661|ref|NP_001055430.1|	475	1e-132	Os05g0388600 [Oryza sativa Japonica Group]	sp|Q00939|FOXG1_RAT	39.3	7e-07	Forkhead box protein G1 OS=Rattus norvegicus GN=Foxg1 PE=2 SV=1	--	--	--	--	--	--	--	--	--	--	-	-	-
Unigene0001552	3462	347	5.4386	305	4.2218	gi|470127954|ref|XP_004299922.1|	763	0	PREDICTED: U-box domain-containing protein 16-like [Fragaria vesca subsp. vesca]	sp|Q9LZW3|PUB16_ARATH	655	0	U-box domain-containing protein 16 OS=Arabidopsis thaliana GN=PUB16 PE=2 SV=1	--	--	--	--	--	--	--	--	--	--	GO:0032446//protein modification by small protein conjugation	GO:0019787//small conjugating protein ligase activity	GO:0043234//protein complex
Unigene0001553	527	35	3.6036	12	1.0912	--	--	--	--	--	--	--	--	--	--	--	--	--	--	--	--	--	--	-	-	-
Unigene0001554	2043	24	0.6374	20	0.4691	gi|442803250|gb|AGC78985.1|	193	2e-47	hypothetical protein (mitochondrion) [Vicia faba]	--	--	--	--	--	--	--	--	--	--	--	--	--	--	-	-	GO:0043231//intracellular membrane-bounded organelle
Unigene0001555	1683	108	3.4819	84	2.3918	gi|357516417|ref|XP_003628497.1|	116	2e-24	NADH dehydrogenase subunit F [Medicago truncatula]	sp|P08834|NU1M_CITLA	61.6	2e-08	NADH-ubiquinone oxidoreductase chain 1 OS=Citrullus lanatus GN=ND1 PE=2 SV=1	--	--	--	--	--	--	--	--	--	--	GO:0022904//respiratory electron transport chain	GO:0050136//NADH dehydrogenase (quinone) activity	GO:0043231//intracellular membrane-bounded organelle;GO:0031224//intrinsic to membrane
Unigene0001556	834	0	0	0	0	gi|357436123|ref|XP_003588337.1|	276	3e-73	Ribosomal protein S10 [Medicago truncatula]	sp|P08834|NU1M_CITLA	53.1	2e-07	NADH-ubiquinone oxidoreductase chain 1 OS=Citrullus lanatus GN=ND1 PE=2 SV=1	--	--	--	--	--	--	--	--	--	--	GO:0015988//energy coupled proton transport, against electrochemical gradient;GO:0022900//electron transport chain;GO:0006754//ATP biosynthetic process;GO:0034645//cellular macromolecule biosynthetic process	GO:0005198//structural molecule activity;GO:0019829//cation-transporting ATPase activity;GO:0015078//hydrogen ion transmembrane transporter activity;GO:0032559;GO:0005506//iron ion binding;GO:0015002//heme-copper terminal oxidase activity;GO:0050136//NADH dehydrogenase (quinone) activity	GO:0043231//intracellular membrane-bounded organelle;GO:0033178//proton-transporting two-sector ATPase complex, catalytic domain;GO:0031224//intrinsic to membrane;GO:0030529//ribonucleoprotein complex
Unigene0001557	1873	0	0	0	0	gi|442803250|gb|AGC78985.1|	193	1e-47	hypothetical protein (mitochondrion) [Vicia faba]	--	--	--	--	--	--	--	--	--	--	--	--	--	--	-	-	GO:0043231//intracellular membrane-bounded organelle
Unigene0001558	825	84	5.5247	54	3.1366	--	--	--	--	--	--	--	--	--	--	--	--	--	--	--	--	--	--	-	-	-
Unigene0001559	230	1	0.2359	3	0.6251	--	--	--	--	--	--	--	--	--	--	--	--	--	--	--	--	--	--	-	-	-
Unigene0001560	1636	1564	51.8722	1462	42.8242	gi|508782424|gb|EOY29680.1|	744	0	Aspartate aminotransferase 3 [Theobroma cacao]	sp|P28734|AATC_DAUCA	721	0	Aspartate aminotransferase, cytoplasmic OS=Daucus carota PE=2 SV=1	SPBC725.01	384	3e-106	COG1448	Aspartate/tyrosine/aromatic aminotransferase	K00813	0	743	pop:POPTR_835881	aspartate aminotransferase [EC:2.6.1.1]	GO:0009078//pyruvate family amino acid metabolic process;GO:0009066//aspartate family amino acid metabolic process;GO:0046356//acetyl-CoA catabolic process	GO:0046914//transition metal ion binding;GO:0070546;GO:0048037//cofactor binding	GO:0044444//cytoplasmic part;GO:0016020//membrane;GO:0030312//external encapsulating structure
Unigene0001561	1589	0	0	0	0	gi|508782424|gb|EOY29680.1|	790	0	Aspartate aminotransferase 3 [Theobroma cacao]	sp|P46644|AAT3_ARATH	758	0	Aspartate aminotransferase, chloroplastic OS=Arabidopsis thaliana GN=ASP3 PE=2 SV=1	SPBC725.01	388	1e-107	COG1448	Aspartate/tyrosine/aromatic aminotransferase	K00813	0	768	rcu:RCOM_0802970	aspartate aminotransferase [EC:2.6.1.1]	GO:0009078//pyruvate family amino acid metabolic process;GO:0046356//acetyl-CoA catabolic process;GO:0009066//aspartate family amino acid metabolic process;GO:0010260//organ senescence	GO:0070546;GO:0046914//transition metal ion binding;GO:0048037//cofactor binding	GO:0030312//external encapsulating structure;GO:0042579//microbody;GO:0016020//membrane
Unigene0001562	582	34	3.1698	8	0.6587	gi|225434544|ref|XP_002276936.1|	89.7	4e-17	PREDICTED: probable protein phosphatase 2C 25 isoform 1 [Vitis vinifera]	sp|Q8RX37|P2C02_ARATH	76.3	1e-13	Probable protein phosphatase 2C 2 OS=Arabidopsis thaliana GN=At1g07160 PE=2 SV=1	--	--	--	--	--	--	--	--	--	--	GO:0006464//protein modification process;GO:0009755//hormone-mediated signaling pathway	GO:0043169//cation binding;GO:0004721//phosphoprotein phosphatase activity	GO:0043234//protein complex;GO:0043231//intracellular membrane-bounded organelle
Unigene0001563	240	34	7.6869	23	4.5924	--	--	--	--	--	--	--	--	--	--	--	--	--	--	--	--	--	--	-	-	-
Unigene0001564	2028	0	0	0	0	gi|470110165|ref|XP_004291357.1|	895	0	PREDICTED: tubulin beta-1 chain-like [Fragaria vesca subsp. vesca]	sp|Q9ZPP0|TBB1_ELEIN	877	0	Tubulin beta-1 chain OS=Eleusine indica GN=TUBB1 PE=2 SV=1	ECU03g0820i	713	0	COG5023	Tubulin	K07375	0	895	vvi:100259087	tubulin beta	GO:0009314//response to radiation;GO:0010038//response to metal ion;GO:0000902//cell morphogenesis;GO:0043623//cellular protein complex assembly;GO:0009207;GO:0006928//cellular component movement	GO:0017111//nucleoside-triphosphatase activity;GO:0032561//guanyl ribonucleotide binding	GO:0043234//protein complex;GO:0030312//external encapsulating structure;GO:0009536//plastid;GO:0043232;GO:0016020//membrane
Unigene0001565	1950	0	0	0	0	gi|502080159|ref|XP_004486478.1|	892	0	PREDICTED: tubulin beta-3 chain-like [Cicer arietinum]	sp|Q40665|TBB3_ORYSJ	886	0	Tubulin beta-3 chain OS=Oryza sativa subsp. japonica GN=TUBB3 PE=1 SV=2	ECU03g0820i	710	0	COG5023	Tubulin	K07375	0	891	pop:POPTR_582598	tubulin beta	GO:0010038//response to metal ion;GO:0043623//cellular protein complex assembly;GO:0009207;GO:0006928//cellular component movement	GO:0017111//nucleoside-triphosphatase activity;GO:0032561//guanyl ribonucleotide binding	GO:0043234//protein complex;GO:0030312//external encapsulating structure;GO:0009536//plastid;GO:0043232;GO:0016020//membrane
Unigene0001566	1870	0	0	0	0	gi|153799899|gb|ABS50668.1|	892	0	beta-tubulin [Eucalyptus grandis]	sp|Q9ZPP0|TBB1_ELEIN	884	0	Tubulin beta-1 chain OS=Eleusine indica GN=TUBB1 PE=2 SV=1	ECU03g0820i	717	0	COG5023	Tubulin	K07375	0	885	rcu:RCOM_1336530	tubulin beta	GO:0010038//response to metal ion;GO:0043623//cellular protein complex assembly;GO:0009207;GO:0006928//cellular component movement	GO:0017111//nucleoside-triphosphatase activity;GO:0032561//guanyl ribonucleotide binding	GO:0043234//protein complex;GO:0030312//external encapsulating structure;GO:0009536//plastid;GO:0043232;GO:0016020//membrane
Unigene0001567	1794	1626	49.179	2753	73.5374	gi|514783235|ref|XP_004970293.1|	886	0	PREDICTED: LOW QUALITY PROTEIN: tubulin beta-4 chain-like [Setaria italica]	sp|Q8H7U1|TBB2_ORYSJ	883	0	Tubulin beta-2 chain OS=Oryza sativa subsp. japonica GN=TUBB2 PE=2 SV=1	ECU03g0820i	715	0	COG5023	Tubulin	K07375	0	886	rcu:RCOM_1686370	tubulin beta	GO:0043623//cellular protein complex assembly;GO:0009207;GO:0006970//response to osmotic stress;GO:0006928//cellular component movement	GO:0017111//nucleoside-triphosphatase activity;GO:0032561//guanyl ribonucleotide binding	GO:0043234//protein complex;GO:0043232
Unigene0001568	1792	0	0	0	0	gi|502080159|ref|XP_004486478.1|	901	0	PREDICTED: tubulin beta-3 chain-like [Cicer arietinum]	sp|Q40665|TBB3_ORYSJ	891	0	Tubulin beta-3 chain OS=Oryza sativa subsp. japonica GN=TUBB3 PE=1 SV=2	ECU03g0820i	714	0	COG5023	Tubulin	K07375	0	894	rcu:RCOM_1336530	tubulin beta	GO:0010038//response to metal ion;GO:0043623//cellular protein complex assembly;GO:0009207;GO:0006928//cellular component movement	GO:0017111//nucleoside-triphosphatase activity;GO:0032561//guanyl ribonucleotide binding	GO:0043234//protein complex;GO:0030312//external encapsulating structure;GO:0009536//plastid;GO:0043232;GO:0016020//membrane
Unigene0001569	1126	171	8.2402	97	4.1282	gi|508700091|gb|EOX91987.1|	557	1e-157	MATE efflux family protein [Theobroma cacao]	sp|Q9LYT3|TT12_ARATH	239	3e-62	Protein TRANSPARENT TESTA 12 OS=Arabidopsis thaliana GN=TT12 PE=2 SV=1	SPCC4B3.13	101	3e-21	COG0534	Na+-driven multidrug efflux pump	--	--	--	--	--	-	-	-
Unigene0001570	553	0	0	0	0	gi|449448456|ref|XP_004141982.1|	75.1	8e-13	PREDICTED: pentatricopeptide repeat-containing protein At5g67570, chloroplastic-like [Cucumis sativus]	sp|Q9FJW6|PP451_ARATH	70.1	9e-12	Pentatricopeptide repeat-containing protein At5g67570, chloroplastic OS=Arabidopsis thaliana GN=DG1 PE=1 SV=2	--	--	--	--	--	--	--	--	--	--	GO:0009987//cellular process	GO:0000166//nucleotide binding	GO:0009536//plastid
Unigene0001571	967	4	0.2244	6	0.2973	gi|334188692|ref|NP_201558.3|	336	4e-91	pentatricopeptide repeat-containing protein delayed greening 1 [Arabidopsis thaliana]	sp|Q9FJW6|PP451_ARATH	336	1e-91	Pentatricopeptide repeat-containing protein At5g67570, chloroplastic OS=Arabidopsis thaliana GN=DG1 PE=1 SV=2	--	--	--	--	--	--	--	--	--	--	GO:0009987//cellular process	GO:0000166//nucleotide binding	GO:0009536//plastid
Unigene0001572	647	14	1.1741	13	0.9629	gi|334188692|ref|NP_201558.3|	88.6	2e-31	pentatricopeptide repeat-containing protein delayed greening 1 [Arabidopsis thaliana]	sp|Q9FJW6|PP451_ARATH	88.6	6e-32	Pentatricopeptide repeat-containing protein At5g67570, chloroplastic OS=Arabidopsis thaliana GN=DG1 PE=1 SV=2	--	--	--	--	--	--	--	--	--	--	GO:0009987//cellular process	GO:0000166//nucleotide binding	GO:0009536//plastid
Unigene0001573	1280	27	1.1446	24	0.8985	gi|508785470|gb|EOY32726.1|	554	1e-156	Set1/Ash2 histone methyltransferase complex subunit ASH2 [Theobroma cacao]	sp|Q9UBL3|ASH2L_HUMAN	172	4e-42	Set1/Ash2 histone methyltransferase complex subunit ASH2 OS=Homo sapiens GN=ASH2L PE=1 SV=1	--	--	--	--	--	K14964	2e-155	548	rcu:RCOM_1578640	Set1/Ash2 histone methyltransferase complex subunit ASH2	-	-	-
Unigene0001574	528	0	0	0	0	gi|225466255|ref|XP_002268353.1|	136	2e-31	PREDICTED: uncharacterized aarF domain-containing protein kinase 1-like [Vitis vinifera]	sp|Q9D0L4|ADCK1_MOUSE	75.5	2e-13	Uncharacterized aarF domain-containing protein kinase 1 OS=Mus musculus GN=Adck1 PE=2 SV=1	SPBC15C4.02	55.5	5e-08	COG0661	Predicted unusual protein kinase	K08869	1e-33	142	rcu:RCOM_0113190	aarF domain-containing kinase	-	GO:0016772//transferase activity, transferring phosphorus-containing groups	-
Unigene0001575	1107	0	0	0	0	gi|225466255|ref|XP_002268353.1|	86.7	4e-25	PREDICTED: uncharacterized aarF domain-containing protein kinase 1-like [Vitis vinifera]	sp|Q6YS30|RH5_ORYSJ	76.3	4e-13	DEAD-box ATP-dependent RNA helicase 5 OS=Oryza sativa subsp. japonica GN=Os07g0301200 PE=2 SV=1	mll0224	58.5	2e-08	COG0513	Superfamily II DNA and RNA helicases	K08869	4e-26	85.5	pop:POPTR_714306	aarF domain-containing kinase	-	GO:0016772//transferase activity, transferring phosphorus-containing groups	-
Unigene0001576	873	0	0	0	0	gi|225466255|ref|XP_002268353.1|	129	8e-49	PREDICTED: uncharacterized aarF domain-containing protein kinase 1-like [Vitis vinifera]	sp|Q86TW2|ADCK1_HUMAN	76.3	7e-21	Uncharacterized aarF domain-containing protein kinase 1 OS=Homo sapiens GN=ADCK1 PE=2 SV=2	sll0095	71.2	4e-19	COG0661	Predicted unusual protein kinase	K08869	2e-49	129	vvi:100244438	aarF domain-containing kinase	GO:0006796//phosphate-containing compound metabolic process	GO:0016301//kinase activity	-
Unigene0001577	1217	0	0	0	0	gi|225466255|ref|XP_002268353.1|	86.7	5e-25	PREDICTED: uncharacterized aarF domain-containing protein kinase 1-like [Vitis vinifera]	sp|Q6YS30|RH5_ORYSJ	76.3	4e-13	DEAD-box ATP-dependent RNA helicase 5 OS=Oryza sativa subsp. japonica GN=Os07g0301200 PE=2 SV=1	mll0224	58.5	2e-08	COG0513	Superfamily II DNA and RNA helicases	K08869	5e-26	85.5	pop:POPTR_714306	aarF domain-containing kinase	-	GO:0016772//transferase activity, transferring phosphorus-containing groups	-
Unigene0001578	2105	21	0.5413	13	0.2959	gi|225439404|ref|XP_002263705.1|	240	9e-62	PREDICTED: transcription factor TGA4-like [Vitis vinifera]	sp|Q39163|TGA5_ARATH	89.7	8e-17	Transcription factor TGA5 OS=Arabidopsis thaliana GN=TGA5 PE=1 SV=2	Rv3876	62	4e-09	COG0455	ATPases involved in chromosome partitioning	--	--	--	--	--	-	-	-
Unigene0001579	896	0	0	0	0	gi|225466255|ref|XP_002268353.1|	112	1e-23	PREDICTED: uncharacterized aarF domain-containing protein kinase 1-like [Vitis vinifera]	sp|Q54P00|ABKD_DICDI	45.4	4e-10	Probable serine/threonine-protein kinase abkD OS=Dictyostelium discoideum GN=abkD PE=2 SV=1	MTH1645	54.7	2e-07	COG0661	Predicted unusual protein kinase	K08869	3e-24	112	vvi:100244438	aarF domain-containing kinase	-	-	-
Unigene0001580	453	24	2.8747	11	1.1636	gi|351725777|ref|NP_001237872.1|	60.5	1e-10	DEAD-box RNA helicase [Glycine max]	sp|Q9C551|RH5_ARATH	64.3	3e-10	DEAD-box ATP-dependent RNA helicase 5 OS=Arabidopsis thaliana GN=RH5 PE=1 SV=1	--	--	--	--	--	K14811	5e-11	66.2	rcu:RCOM_1316940	ATP-dependent RNA helicase DBP3 [EC:3.6.4.13]	-	GO:0042623//ATPase activity, coupled;GO:0000166//nucleotide binding	GO:0044444//cytoplasmic part
Unigene0001581	426	4	0.5095	0	0	gi|15222526|ref|NP_174479.1|	61.6	5e-09	stress response suppressor 1 [Arabidopsis thaliana]	sp|Q9C551|RH5_ARATH	61.6	2e-09	DEAD-box ATP-dependent RNA helicase 5 OS=Arabidopsis thaliana GN=RH5 PE=1 SV=1	--	--	--	--	--	K14811	1e-09	61.6	rcu:RCOM_1316940	ATP-dependent RNA helicase DBP3 [EC:3.6.4.13]	-	GO:0005488//binding;GO:0042623//ATPase activity, coupled	GO:0044444//cytoplasmic part
Unigene0001582	923	0	0	0	0	gi|225466255|ref|XP_002268353.1|	112	2e-23	PREDICTED: uncharacterized aarF domain-containing protein kinase 1-like [Vitis vinifera]	sp|Q9SE83|DRP2A_ARATH	103	2e-21	Dynamin-2A OS=Arabidopsis thaliana GN=DRP2A PE=1 SV=2	MTH1645	54.7	2e-07	COG0661	Predicted unusual protein kinase	K08869	3e-24	112	vvi:100244438	aarF domain-containing kinase	GO:0009725//response to hormone stimulus;GO:0006892//post-Golgi vesicle-mediated transport;GO:0009207;GO:0006897//endocytosis	GO:0017111//nucleoside-triphosphatase activity;GO:0008289//lipid binding;GO:0032561//guanyl ribonucleotide binding;GO:0005515//protein binding	GO:0030139//endocytic vesicle;GO:0016020//membrane
Unigene0001583	1194	0	0	0	0	gi|225466255|ref|XP_002268353.1|	95.1	7e-38	PREDICTED: uncharacterized aarF domain-containing protein kinase 1-like [Vitis vinifera]	sp|Q3MIX3|ADCK5_HUMAN	55.5	3e-14	Uncharacterized aarF domain-containing protein kinase 5 OS=Homo sapiens GN=ADCK5 PE=2 SV=2	MA1861	52.8	4e-14	COG0661	Predicted unusual protein kinase	K08869	1e-38	96.7	pop:POPTR_714306	aarF domain-containing kinase	GO:0006796//phosphate-containing compound metabolic process	GO:0016301//kinase activity	-
Unigene0001584	1328	0	0	0	0	gi|225466255|ref|XP_002268353.1|	263	3e-77	PREDICTED: uncharacterized aarF domain-containing protein kinase 1-like [Vitis vinifera]	sp|Q9D0L4|ADCK1_MOUSE	134	1e-30	Uncharacterized aarF domain-containing protein kinase 1 OS=Mus musculus GN=Adck1 PE=2 SV=1	SPBC15C4.02	90.9	5e-18	COG0661	Predicted unusual protein kinase	K08869	5e-80	266	rcu:RCOM_0113190	aarF domain-containing kinase	GO:0006464//protein modification process	GO:0016301//kinase activity;GO:0032559	-
Unigene0001585	1506	0	0	0	0	gi|225466255|ref|XP_002268353.1|	288	2e-76	PREDICTED: uncharacterized aarF domain-containing protein kinase 1-like [Vitis vinifera]	sp|Q9D0L4|ADCK1_MOUSE	138	1e-31	Uncharacterized aarF domain-containing protein kinase 1 OS=Mus musculus GN=Adck1 PE=2 SV=1	YLR253w	75.1	8e-20	COG0661	Predicted unusual protein kinase	K08869	5e-78	291	rcu:RCOM_0113190	aarF domain-containing kinase	-	-	-
Unigene0001586	983	0	0	0	0	gi|225466255|ref|XP_002268353.1|	129	1e-48	PREDICTED: uncharacterized aarF domain-containing protein kinase 1-like [Vitis vinifera]	sp|Q86TW2|ADCK1_HUMAN	76.3	9e-21	Uncharacterized aarF domain-containing protein kinase 1 OS=Homo sapiens GN=ADCK1 PE=2 SV=2	sll0095	71.2	5e-19	COG0661	Predicted unusual protein kinase	K08869	2e-49	129	vvi:100244438	aarF domain-containing kinase	GO:0006796//phosphate-containing compound metabolic process	GO:0016301//kinase activity	-
Unigene0001587	1373	0	0	0	0	gi|225466255|ref|XP_002268353.1|	265	1e-101	PREDICTED: uncharacterized aarF domain-containing protein kinase 1-like [Vitis vinifera]	sp|Q9D0L4|ADCK1_MOUSE	136	7e-47	Uncharacterized aarF domain-containing protein kinase 1 OS=Mus musculus GN=Adck1 PE=2 SV=1	SPBC15C4.02	91.7	5e-30	COG0661	Predicted unusual protein kinase	K08869	5e-102	265	vvi:100244438	aarF domain-containing kinase	GO:0006464//protein modification process	GO:0016301//kinase activity;GO:0032559	-
Unigene0001588	1084	0	0	0	0	gi|225466255|ref|XP_002268353.1|	95.1	6e-38	PREDICTED: uncharacterized aarF domain-containing protein kinase 1-like [Vitis vinifera]	sp|Q5M7P6|ADCK1_XENTR	51.6	3e-14	Uncharacterized aarF domain-containing protein kinase 1 OS=Xenopus tropicalis GN=adck1 PE=2 SV=1	MA1861	52.8	3e-14	COG0661	Predicted unusual protein kinase	K08869	9e-39	96.7	pop:POPTR_714306	aarF domain-containing kinase	GO:0006796//phosphate-containing compound metabolic process	GO:0016301//kinase activity	-
Unigene0001589	1144	0	0	0	0	gi|225466255|ref|XP_002268353.1|	288	2e-76	PREDICTED: uncharacterized aarF domain-containing protein kinase 1-like [Vitis vinifera]	sp|Q9D0L4|ADCK1_MOUSE	140	2e-32	Uncharacterized aarF domain-containing protein kinase 1 OS=Mus musculus GN=Adck1 PE=2 SV=1	YLR253w	75.1	6e-20	COG0661	Predicted unusual protein kinase	K08869	4e-78	291	rcu:RCOM_0113190	aarF domain-containing kinase	-	-	-
Unigene0001590	900	0	0	0	0	gi|225466255|ref|XP_002268353.1|	128	1e-48	PREDICTED: uncharacterized aarF domain-containing protein kinase 1-like [Vitis vinifera]	sp|Q9SE83|DRP2A_ARATH	103	2e-21	Dynamin-2A OS=Arabidopsis thaliana GN=DRP2A PE=1 SV=2	sll0095	71.2	4e-19	COG0661	Predicted unusual protein kinase	K08869	2e-49	128	vvi:100244438	aarF domain-containing kinase	GO:0006796//phosphate-containing compound metabolic process	GO:0016301//kinase activity	-
Unigene0001591	855	0	0	0	0	gi|225466255|ref|XP_002268353.1|	86.7	4e-25	PREDICTED: uncharacterized aarF domain-containing protein kinase 1-like [Vitis vinifera]	sp|Q9SE83|DRP2A_ARATH	103	2e-21	Dynamin-2A OS=Arabidopsis thaliana GN=DRP2A PE=1 SV=2	MTH1645	52.4	1e-06	COG0661	Predicted unusual protein kinase	K08869	4e-26	85.5	pop:POPTR_714306	aarF domain-containing kinase	GO:0009725//response to hormone stimulus;GO:0006892//post-Golgi vesicle-mediated transport;GO:0009207;GO:0006897//endocytosis	GO:0016772//transferase activity, transferring phosphorus-containing groups;GO:0017111//nucleoside-triphosphatase activity;GO:0008289//lipid binding;GO:0032561//guanyl ribonucleotide binding;GO:0005515//protein binding	GO:0030139//endocytic vesicle;GO:0016020//membrane
Unigene0001592	281	28	5.4067	24	4.0929	gi|13509207|emb|CAC35321.1|	54.7	6e-07	Ngc-D protein [Linum usitatissimum]	--	--	--	--	--	--	--	--	--	--	--	--	--	--	-	-	-
Unigene0001593	1483	0	0	0	0	gi|225466255|ref|XP_002268353.1|	265	1e-101	PREDICTED: uncharacterized aarF domain-containing protein kinase 1-like [Vitis vinifera]	sp|Q9D0L4|ADCK1_MOUSE	136	8e-47	Uncharacterized aarF domain-containing protein kinase 1 OS=Mus musculus GN=Adck1 PE=2 SV=1	SPBC15C4.02	91.7	5e-30	COG0661	Predicted unusual protein kinase	K08869	6e-102	265	vvi:100244438	aarF domain-containing kinase	GO:0006464//protein modification process	GO:0016301//kinase activity;GO:0032559	-
Unigene0001594	832	0	0	0	0	gi|225466255|ref|XP_002268353.1|	94.7	5e-38	PREDICTED: uncharacterized aarF domain-containing protein kinase 1-like [Vitis vinifera]	sp|Q9SE83|DRP2A_ARATH	103	2e-21	Dynamin-2A OS=Arabidopsis thaliana GN=DRP2A PE=1 SV=2	MA1861	52.8	2e-14	COG0661	Predicted unusual protein kinase	K08869	8e-39	96.3	pop:POPTR_714306	aarF domain-containing kinase	GO:0009207	GO:0017111//nucleoside-triphosphatase activity;GO:0008289//lipid binding;GO:0032561//guanyl ribonucleotide binding;GO:0016301//kinase activity	-
Unigene0001595	303	7	1.2535	3	0.4745	--	--	--	--	--	--	--	--	--	--	--	--	--	--	--	--	--	--	-	-	-
Unigene0001596	4406	142	1.7487	98	1.0659	gi|508786555|gb|EOY33811.1|	1538	0	Phosphorylase isoform 1 [Theobroma cacao]	sp|P32811|PHSH_SOLTU	1476	0	Alpha-glucan phosphorylase, H isozyme OS=Solanum tuberosum PE=1 SV=1	YPR160w	721	0	COG0058	Glucan phosphorylase	K00688	0	1539	pop:POPTR_821505	starch phosphorylase [EC:2.4.1.1]	GO:0006950//response to stress;GO:0044238//primary metabolic process;GO:0010038//response to metal ion	GO:0048037//cofactor binding;GO:0016758//transferase activity, transferring hexosyl groups	GO:0009536//plastid
Unigene0001597	1021	0	0	0	0	gi|470123558|ref|XP_004297790.1|	422	1e-117	PREDICTED: zinc finger protein NUTCRACKER-like [Fragaria vesca subsp. vesca]	sp|Q700D2|JKD_ARATH	330	8e-90	Zinc finger protein JACKDAW OS=Arabidopsis thaliana GN=JKD PE=1 SV=1	--	--	--	--	--	--	--	--	--	--	-	-	-
Unigene0001598	2182	0	0	0	0	gi|302398697|gb|ADL36643.1|	635	1e-180	C2H2L domain class transcription factor [Malus domestica]	sp|Q9ZWA6|MGP_ARATH	362	6e-99	Zinc finger protein MAGPIE OS=Arabidopsis thaliana GN=MGP PE=1 SV=1	HP0289	53.9	1e-06	COG5651	PPE-repeat proteins	--	--	--	--	--	-	GO:0005488//binding	-
Unigene0001599	206	3	0.7902	0	0	--	--	--	--	--	--	--	--	--	--	--	--	--	--	--	--	--	--	-	-	-
Unigene0001600	2276	8	0.1907	8	0.1684	gi|470149245|ref|XP_004310150.1|	1087	0	PREDICTED: probable peptide/nitrate transporter At5g13400-like [Fragaria vesca subsp. vesca]	sp|Q9LYR6|PTR49_ARATH	1013	0	Probable peptide/nitrate transporter At5g13400 OS=Arabidopsis thaliana GN=At5g13400 PE=2 SV=1	ECU11g1050	108	5e-23	COG3104	Dipeptide/tripeptide permease	--	--	--	--	--	GO:0015833//peptide transport	-	GO:0031224//intrinsic to membrane
Unigene0001601	251	7	1.5132	1	0.1909	--	--	--	--	--	--	--	--	--	--	--	--	--	--	--	--	--	--	-	-	-
Unigene0001602	276	9	1.7694	6	1.0418	--	--	--	--	--	--	--	--	--	--	--	--	--	--	--	--	--	--	-	-	-
Unigene0001603	296	0	0	0	0	--	--	--	--	--	--	--	--	--	--	--	--	--	--	--	--	--	--	-	-	-
Unigene0001604	1283	182	7.6971	75	2.8013	gi|240256182|ref|NP_195370.5|	132	1e-29	chaperone DnaJ-domain containing protein [Arabidopsis thaliana]	sp|Q55AX2|DOT1L_DICDI	89.7	4e-17	Histone-lysine N-methyltransferase, H3 lysine-79 specific OS=Dictyostelium discoideum GN=dotA PE=2 SV=2	VC1837	65.9	1e-10	COG3064	Membrane protein involved in colicin uptake	--	--	--	--	--	-	-	-
Unigene0001605	501	7	0.7581	3	0.287	gi|502153275|ref|XP_004509282.1|	192	3e-48	PREDICTED: LOW QUALITY PROTEIN: axoneme-associated protein mst101(2)-like [Cicer arietinum]	sp|Q0WQ57|AUXI2_ARATH	95.9	1e-19	Auxilin-related protein 2 OS=Arabidopsis thaliana GN=At4g12770 PE=1 SV=1	DR1549	65.5	4e-11	COG0739	Membrane proteins related to metalloendopeptidases	--	--	--	--	--	-	GO:0005515//protein binding	-
Unigene0001606	209	0	0	0	0	--	--	--	--	--	--	--	--	--	--	--	--	--	--	--	--	--	--	-	-	-
Unigene0001607	846	5	0.3207	0	0	gi|225442515|ref|XP_002278439.1|	92	2e-32	PREDICTED: probable disease resistance protein At5g63020-like [Vitis vinifera]	sp|Q9C8K0|DRL5_ARATH	43.9	3e-09	Probable disease resistance protein At1g51480 OS=Arabidopsis thaliana GN=At1g51480 PE=2 SV=2	--	--	--	--	--	K01164	1e-31	95.5	vvi:100258314	ribonuclease P/MRP protein subunit POP1 [EC:3.1.26.5]	-	GO:0032559	-
Unigene0001608	331	17	2.7868	5	0.7239	gi|359482594|ref|XP_002279461.2|	124	8e-28	PREDICTED: disease resistance protein RPS5-like [Vitis vinifera]	sp|Q9SSR8|DRL6_ARATH	111	2e-24	Probable disease resistance protein At1g52660 OS=Arabidopsis thaliana GN=At1g52660 PE=2 SV=1	--	--	--	--	--	--	--	--	--	--	GO:0050896//response to stimulus	GO:0016787//hydrolase activity;GO:0032559	-
Unigene0001609	219	18	4.4597	8	1.7505	gi|359482577|ref|XP_002278676.2|	70.1	1e-11	PREDICTED: probable disease resistance protein At5g63020-like [Vitis vinifera]	sp|Q9SI85|DRL14_ARATH	57	4e-08	Probable disease resistance protein At1g62630 OS=Arabidopsis thaliana GN=At1g62630 PE=3 SV=2	--	--	--	--	--	--	--	--	--	--	-	GO:0016787//hydrolase activity;GO:0032559	-
Unigene0001610	1445	47	1.7649	32	1.0612	gi|508726834|gb|EOY18731.1|	596	1e-169	Transmembrane amino acid transporter family protein isoform 4 [Theobroma cacao]	sp|P47082|AVT1_YEAST	135	8e-31	Vacuolar amino acid transporter 1 OS=Saccharomyces cerevisiae (strain ATCC 204508 / S288c) GN=AVT1 PE=1 SV=1	YJR001w	135	2e-31	COG0814	Amino acid permeases	K15015	8e-173	606	rcu:RCOM_0481560	solute carrier family 32 (vesicular inhibitory amino acid transporter)	-	-	-
Unigene0001611	3926	0	0	0	0	gi|290490306|gb|ADD31560.1|	475	1e-132	ATP synthase CF0 subunit IV protein [Oxalis latifolia]	sp|P69372|ATPI_TOBAC	472	1e-131	ATP synthase subunit a, chloroplastic OS=Nicotiana tabacum GN=atpI PE=3 SV=1	sll1322	334	8e-91	COG0356	F0F1-type ATP synthase, subunit a	K02108	9e-131	468	vvi:4025095	F-type H+-transporting ATPase subunit a [EC:3.6.3.14]	-	-	-
Unigene0001612	558	21	2.0421	6	0.5153	gi|157690188|gb|ABV65781.1|	373	1e-102	RNA polymerase beta'' subunit, partial (chloroplast) [Swietenia macrophylla]	sp|B1A925|RPOC2_CARPA	357	3e-98	DNA-directed RNA polymerase subunit beta'' OS=Carica papaya GN=rpoC2 PE=3 SV=1	sll1789	145	4e-35	COG0086	DNA-directed RNA polymerase, beta' subunit/160 kD subunit	K03046	1e-96	351	vvi:4025097	DNA-directed RNA polymerase subunit beta' [EC:2.7.7.6]	GO:0032774	GO:0034062//RNA polymerase activity;GO:0003676//nucleic acid binding	GO:0009536//plastid
Unigene0001613	498	34	3.7045	39	3.7528	gi|508726281|gb|EOY18178.1|	56.2	3e-07	FYD [Theobroma cacao]	--	--	--	--	--	--	--	--	--	--	--	--	--	--	-	-	-
Unigene0001614	946	0	0	0	0	gi|229609865|gb|ACQ83548.1|	250	3e-65	calcineurin B-like protein 07 [Sorghum bicolor]	sp|Q3HRN8|CNBL9_ORYSJ	244	9e-64	Calcineurin B-like protein 9 OS=Oryza sativa subsp. japonica GN=CBL9 PE=2 SV=2	YKL190w	72	1e-12	COG5126	Ca2+-binding protein (EF-Hand superfamily)	--	--	--	--	--	GO:0032844;GO:0006972//hyperosmotic response	GO:0046872//metal ion binding	GO:0005774//vacuolar membrane
Unigene0001615	893	0	0	0	0	gi|229609865|gb|ACQ83548.1|	127	7e-52	calcineurin B-like protein 07 [Sorghum bicolor]	sp|Q3HRN8|CNBL9_ORYSJ	125	2e-50	Calcineurin B-like protein 9 OS=Oryza sativa subsp. japonica GN=CBL9 PE=2 SV=2	--	--	--	--	--	--	--	--	--	--	GO:0032844;GO:0006972//hyperosmotic response	GO:0046872//metal ion binding	GO:0005774//vacuolar membrane
Unigene0001616	458	0	0	0	0	gi|229609865|gb|ACQ83548.1|	129	3e-29	calcineurin B-like protein 07 [Sorghum bicolor]	sp|Q3HRN7|CNBLA_ORYSJ	126	5e-29	Calcineurin B-like protein 10 OS=Oryza sativa subsp. japonica GN=CBL10 PE=2 SV=1	YKL190w	47.4	1e-05	COG5126	Ca2+-binding protein (EF-Hand superfamily)	--	--	--	--	--	GO:0032844;GO:0006972//hyperosmotic response	GO:0046872//metal ion binding	GO:0005774//vacuolar membrane
Unigene0001617	1361	0	0	0	0	gi|133925825|gb|ABO43665.1|	182	2e-76	calcineurin B-like protein 6 [Populus trichocarpa]	sp|Q3HRN7|CNBLA_ORYSJ	166	2e-69	Calcineurin B-like protein 10 OS=Oryza sativa subsp. japonica GN=CBL10 PE=2 SV=1	--	--	--	--	--	--	--	--	--	--	GO:0032844;GO:0006972//hyperosmotic response	GO:0046872//metal ion binding	GO:0005774//vacuolar membrane
Unigene0001618	816	0	0	0	0	gi|133925825|gb|ABO43665.1|	211	2e-53	calcineurin B-like protein 6 [Populus trichocarpa]	sp|Q3HRN7|CNBLA_ORYSJ	194	5e-49	Calcineurin B-like protein 10 OS=Oryza sativa subsp. japonica GN=CBL10 PE=2 SV=1	YKL190w	54.7	2e-07	COG5126	Ca2+-binding protein (EF-Hand superfamily)	--	--	--	--	--	-	-	GO:0005737//cytoplasm;GO:0016020//membrane
Unigene0001619	1414	0	0	0	0	gi|133925825|gb|ABO43665.1|	333	6e-90	calcineurin B-like protein 6 [Populus trichocarpa]	sp|Q3HRN7|CNBLA_ORYSJ	307	1e-82	Calcineurin B-like protein 10 OS=Oryza sativa subsp. japonica GN=CBL10 PE=2 SV=1	YKL190w	79.3	1e-14	COG5126	Ca2+-binding protein (EF-Hand superfamily)	--	--	--	--	--	GO:0032844;GO:0006972//hyperosmotic response	GO:0046872//metal ion binding	GO:0005774//vacuolar membrane
Unigene0001620	926	0	0	0	0	gi|133925825|gb|ABO43665.1|	211	2e-53	calcineurin B-like protein 6 [Populus trichocarpa]	sp|Q3HRN7|CNBLA_ORYSJ	194	1e-48	Calcineurin B-like protein 10 OS=Oryza sativa subsp. japonica GN=CBL10 PE=2 SV=1	YKL190w	54.7	2e-07	COG5126	Ca2+-binding protein (EF-Hand superfamily)	--	--	--	--	--	-	-	GO:0005737//cytoplasm;GO:0016020//membrane
Unigene0001621	3024	138	2.4762	144	2.2819	gi|502175105|ref|XP_004515670.1|	627	1e-178	PREDICTED: serine-rich adhesin for platelets-like isoform X2 [Cicer arietinum]	sp|Q8VQ99|SRAP_STAAU	60.1	1e-07	Serine-rich adhesin for platelets OS=Staphylococcus aureus GN=sraP PE=3 SV=1	--	--	--	--	--	--	--	--	--	--	-	-	-
Unigene0001622	755	23	1.653	15	0.9521	gi|508703431|gb|EOX95327.1|	58.5	2e-07	Uncharacterized protein isoform 1 [Theobroma cacao]	--	--	--	--	--	--	--	--	--	--	--	--	--	--	-	-	-
Unigene0001623	270	5	1.0048	1	0.1775	--	--	--	--	--	--	--	--	--	--	--	--	--	--	--	--	--	--	-	-	-
Unigene0001624	869	33	2.0605	9	0.4963	--	--	--	--	--	--	--	--	--	--	--	--	--	--	--	--	--	--	-	-	-
Unigene0001625	712	21	1.6004	9	0.6057	gi|449526158|ref|XP_004170081.1|	224	2e-57	PREDICTED: uncharacterized LOC101222087 [Cucumis sativus]	--	--	--	--	--	--	--	--	--	--	--	--	--	--	GO:0033036	-	GO:0043231//intracellular membrane-bounded organelle
Unigene0001626	3259	43	0.7159	33	0.4852	gi|508784681|gb|EOY31937.1|	1614	0	Villin 4 isoform 4 [Theobroma cacao]	sp|O65570|VILI4_ARATH	1483	0	Villin-4 OS=Arabidopsis thaliana GN=VLN4 PE=1 SV=1	--	--	--	--	--	--	--	--	--	--	GO:0009725//response to hormone stimulus;GO:0006996//organelle organization	GO:0008092//cytoskeletal protein binding	-
Unigene0001627	3285	2	0.033	10	0.1459	gi|359485106|ref|XP_002268471.2|	1685	0	PREDICTED: LOW QUALITY PROTEIN: villin-4 [Vitis vinifera]	sp|O65570|VILI4_ARATH	1551	0	Villin-4 OS=Arabidopsis thaliana GN=VLN4 PE=1 SV=1	--	--	--	--	--	--	--	--	--	--	GO:0009725//response to hormone stimulus;GO:0006996//organelle organization	GO:0008092//cytoskeletal protein binding	-
Unigene0001628	3292	12	0.1978	10	0.1456	gi|359485106|ref|XP_002268471.2|	1615	0	PREDICTED: LOW QUALITY PROTEIN: villin-4 [Vitis vinifera]	sp|O65570|VILI4_ARATH	1484	0	Villin-4 OS=Arabidopsis thaliana GN=VLN4 PE=1 SV=1	--	--	--	--	--	--	--	--	--	--	GO:0009725//response to hormone stimulus;GO:0006996//organelle organization	GO:0008092//cytoskeletal protein binding	-
Unigene0001629	4032	1015	13.6592	1058	12.5745	gi|508779339|gb|EOY26595.1|	986	0	TLC ATP/ADP transporter isoform 1 [Theobroma cacao]	sp|O24381|TLC1_SOLTU	966	0	Plastidic ATP/ADP-transporter OS=Solanum tuberosum PE=2 SV=2	CPn0351	508	4e-143	COG3202	ATP/ADP translocase	K03301	0	978	pop:POPTR_817085	ATP:ADP antiporter, AAA family	GO:0051234//establishment of localization	GO:0032559;GO:0015300//solute:solute antiporter activity	GO:0009526//plastid envelope;GO:0031224//intrinsic to membrane
Unigene0001630	212	2	0.5119	0	0	--	--	--	--	--	--	--	--	--	--	--	--	--	--	--	--	--	--	-	-	-
Unigene0001631	500	86	9.3328	85	8.1465	gi|449521693|ref|XP_004167864.1|	147	1e-34	PREDICTED: proline--tRNA ligase-like, partial [Cucumis sativus]	sp|P28668|SYEP_DROME	76.6	7e-14	Bifunctional glutamate/proline--tRNA ligase OS=Drosophila melanogaster GN=Aats-glupro PE=1 SV=2	SPBC19C7.06_2	92	4e-19	COG0442	Prolyl-tRNA synthetase	K01881	5e-38	156	rcu:RCOM_1343320	prolyl-tRNA synthetase [EC:6.1.1.15]	GO:0006412//translation;GO:0043039//tRNA aminoacylation	GO:0016876//ligase activity, forming aminoacyl-tRNA and related compounds;GO:0000166//nucleotide binding	GO:0005911//cell-cell junction;GO:0044444//cytoplasmic part
Unigene0001632	1194	0	0	0	0	--	--	--	--	--	--	--	--	--	--	--	--	--	--	--	--	--	--	-	-	-
Unigene0001633	1212	0	0	0	0	--	--	--	--	--	--	--	--	--	--	--	--	--	--	--	--	--	--	-	-	-
Unigene0001634	1107	0	0	0	0	--	--	--	--	--	--	--	--	--	--	--	--	--	--	--	--	--	--	-	-	-
Unigene0001635	1808	28	0.8403	18	0.4771	gi|508703559|gb|EOX95455.1|	196	2e-48	Class II aaRS and biotin synthetases superfamily protein isoform 3 [Theobroma cacao]	sp|P07814|SYEP_HUMAN	150	4e-35	Bifunctional glutamate/proline--tRNA ligase OS=Homo sapiens GN=EPRS PE=1 SV=5	SPBC19C7.06_2	137	5e-32	COG0442	Prolyl-tRNA synthetase	K01881	1e-48	194	pop:POPTR_552617	prolyl-tRNA synthetase [EC:6.1.1.15]	-	-	-
Unigene0001636	637	242	20.6138	269	20.2366	gi|225466239|ref|XP_002267800.1|	112	8e-24	PREDICTED: DNA-directed RNA polymerases I, II, and III subunit RPABC4-like [Vitis vinifera]	sp|Q63871|RPAB4_MOUSE	72.4	2e-12	DNA-directed RNA polymerases I, II, and III subunit RPABC4 OS=Mus musculus GN=Polr2k PE=2 SV=2	SPBC19C2.03	71.2	1e-12	COG1996	DNA-directed RNA polymerase, subunit RPC10 (contains C4-type Zn-finger)	K03009	5e-25	114	pop:POPTR_661185	DNA-directed RNA polymerases I, II, and III subunit RPABC4	GO:0032774	GO:0034062//RNA polymerase activity;GO:0003676//nucleic acid binding	GO:0044451//nucleoplasm part;GO:0055029
Unigene0001637	670	5	0.4049	0	0	gi|470119751|ref|XP_004295974.1|	136	4e-31	PREDICTED: probable LRR receptor-like serine/threonine-protein kinase At3g47570-like [Fragaria vesca subsp. vesca]	sp|C0LGP4|Y3475_ARATH	90.1	1e-17	Probable LRR receptor-like serine/threonine-protein kinase At3g47570 OS=Arabidopsis thaliana GN=At3g47570 PE=1 SV=1	--	--	--	--	--	--	--	--	--	--	GO:0006796//phosphate-containing compound metabolic process	GO:0004672//protein kinase activity;GO:0000166//nucleotide binding	GO:0016020//membrane
Unigene0001638	695	24	1.8737	16	1.1032	--	--	--	--	--	--	--	--	--	--	--	--	--	--	--	--	--	--	-	-	-
Unigene0001639	238	11	2.5078	3	0.604	--	--	--	--	--	--	--	--	--	--	--	--	--	--	--	--	--	--	-	-	-
Unigene0001640	2062	0	0	2	0.0465	gi|410111034|gb|AEO31517.2|	495	0	WRKY transcription factor 47-2 [Dimocarpus longan]	sp|Q9ZSI7|WRK47_ARATH	275	9e-82	Probable WRKY transcription factor 47 OS=Arabidopsis thaliana GN=WRKY47 PE=2 SV=2	--	--	--	--	--	--	--	--	--	--	-	GO:0003677//DNA binding	-
Unigene0001641	2302	12	0.2829	2	0.0416	gi|410111034|gb|AEO31517.2|	495	0	WRKY transcription factor 47-2 [Dimocarpus longan]	sp|Q9ZSI7|WRK47_ARATH	275	4e-109	Probable WRKY transcription factor 47 OS=Arabidopsis thaliana GN=WRKY47 PE=2 SV=2	--	--	--	--	--	--	--	--	--	--	-	-	-
Unigene0001642	962	20	1.1281	20	0.9963	gi|470136923|ref|XP_004304230.1|	248	2e-64	PREDICTED: protein RIK-like [Fragaria vesca subsp. vesca]	sp|Q9LIA4|RIK_ARATH	152	3e-36	Protein RIK OS=Arabidopsis thaliana GN=RIK PE=1 SV=2	--	--	--	--	--	--	--	--	--	--	-	-	-
Unigene0001643	243	4	0.8932	5	0.986	--	--	--	--	--	--	--	--	--	--	--	--	--	--	--	--	--	--	-	-	-
Unigene0001644	223	2	0.4866	0	0	--	--	--	--	--	--	--	--	--	--	--	--	--	--	--	--	--	--	-	-	-
Unigene0001645	508	297	31.723	361	34.054	--	--	--	--	--	--	--	--	--	--	--	--	--	--	--	--	--	--	-	-	-
Unigene0001646	225	5	1.2058	1	0.213	--	--	--	--	--	--	--	--	--	--	--	--	--	--	--	--	--	--	-	-	-
Unigene0001647	1259	22	0.9482	8	0.3045	gi|225428645|ref|XP_002281517.1|	142	3e-38	PREDICTED: B3 domain-containing transcription factor VRN1-like [Vitis vinifera]	sp|Q8L3W1|VRN1_ARATH	124	3e-32	B3 domain-containing transcription factor VRN1 OS=Arabidopsis thaliana GN=VRN1 PE=1 SV=1	--	--	--	--	--	--	--	--	--	--	-	-	-
Unigene0001648	3465	58	0.9083	72	0.9958	gi|508775992|gb|EOY23248.1|	1308	0	Kinase superfamily protein isoform 2 [Theobroma cacao]	sp|Q9FZ36|M3K2_ARATH	279	1e-73	Mitogen-activated protein kinase kinase kinase 2 OS=Arabidopsis thaliana GN=ANP2 PE=2 SV=1	YAR019c	178	5e-44	COG0515	Serine/threonine protein kinase	--	--	--	--	--	GO:0006468//protein phosphorylation;GO:0009886//post-embryonic morphogenesis;GO:0007243//intracellular protein kinase cascade;GO:0003006//developmental process involved in reproduction	GO:0032559;GO:0004702//receptor signaling protein serine/threonine kinase activity	-
Unigene0001649	439	12	1.4832	6	0.655	--	--	--	--	--	--	--	--	--	--	--	--	--	--	--	--	--	--	-	-	-
Unigene0001650	215	8	2.019	15	3.3433	--	--	--	--	--	--	--	--	--	--	--	--	--	--	--	--	--	--	-	-	-
Unigene0001651	207	10	2.6213	1	0.2315	--	--	--	--	--	--	--	--	--	--	--	--	--	--	--	--	--	--	-	-	-
Unigene0001652	2129	887	22.6063	853	19.1999	gi|261264941|gb|ACX55829.1|	852	0	aspartic proteinase 1 [Castanea mollissima]	sp|O65390|APA1_ARATH	759	0	Aspartic proteinase A1 OS=Arabidopsis thaliana GN=APA1 PE=1 SV=1	--	--	--	--	--	K08245	0	861	rcu:RCOM_1303660	phytepsin [EC:3.4.23.40]	GO:0019538//protein metabolic process;GO:0006970//response to osmotic stress;GO:0010038//response to metal ion	GO:0004175//endopeptidase activity	GO:0043231//intracellular membrane-bounded organelle
Unigene0001653	1307	85	3.5288	39	1.4299	gi|508725310|gb|EOY17207.1|	468	1e-130	DNAJ heat shock N-terminal domain-containing protein isoform 3 [Theobroma cacao]	sp|Q921R4|DJC14_MOUSE	62.4	7e-09	DnaJ homolog subfamily C member 14 OS=Mus musculus GN=Dnajc14 PE=2 SV=2	SPCC4G3.14	58.5	2e-08	COG0484	DnaJ-class molecular chaperone with C-terminal Zn finger domain	--	--	--	--	--	-	-	-
Unigene0001654	230	0	0	0	0	--	--	--	--	--	--	--	--	--	--	--	--	--	--	--	--	--	--	-	-	-
Unigene0001655	924	0	0	0	0	gi|508702845|gb|EOX94741.1|	317	3e-85	F-box family protein [Theobroma cacao]	sp|Q2V3L6|FB343_ARATH	150	2e-35	F-box protein At4g02733 OS=Arabidopsis thaliana GN=At4g02733 PE=2 SV=1	--	--	--	--	--	--	--	--	--	--	-	-	-
Unigene0001656	202	3	0.8058	1	0.2372	--	--	--	--	--	--	--	--	--	--	--	--	--	--	--	--	--	--	-	-	-
Unigene0001657	2482	30	0.6558	22	0.4248	gi|225434327|ref|XP_002266157.1|	800	0	PREDICTED: ATP-dependent RNA helicase DBP2 [Vitis vinifera]	sp|Q6CIV2|DBP2_KLULA	338	9e-92	ATP-dependent RNA helicase DBP2 OS=Kluyveromyces lactis (strain ATCC 8585 / CBS 2359 / DSM 70799 / NBRC 1267 / NRRL Y-1140 / WM37) GN=DBP2 PE=3 SV=1	ECU08g1080	300	1e-80	COG0513	Superfamily II DNA and RNA helicases	--	--	--	--	--	-	GO:0032559;GO:0042623//ATPase activity, coupled	-
Unigene0001658	480	8	0.9043	2	0.1997	gi|225460837|ref|XP_002276623.1|	94	1e-18	PREDICTED: cell division protein ftsZ homolog 1, chloroplastic-like [Vitis vinifera]	sp|Q42545|FTSZ1_ARATH	67.4	4e-11	Cell division protein FtsZ homolog 1, chloroplastic OS=Arabidopsis thaliana GN=FTSZ1 PE=1 SV=2	sll1633	51.2	8e-07	COG0206	Cell division GTPase	K03531	3e-19	94	vvi:100243513	cell division protein FtsZ	GO:0048285	GO:0000166//nucleotide binding	GO:0043234//protein complex;GO:0009536//plastid;GO:0044446//intracellular organelle part
Unigene0001659	208	3	0.7826	2	0.4608	--	--	--	--	--	--	--	--	--	--	--	--	--	--	--	--	--	--	-	-	-
Unigene0001660	678	20	1.6006	21	1.4843	--	--	--	--	--	--	--	--	--	--	--	--	--	--	--	--	--	--	-	-	-
Unigene0001661	1297	56	2.3428	46	1.6996	gi|508704138|gb|EOX96034.1|	426	1e-118	NAD(P)-binding Rossmann-fold superfamily protein [Theobroma cacao]	sp|Q9M2E2|SDR1_ARATH	372	3e-102	(+)-neomenthol dehydrogenase OS=Arabidopsis thaliana GN=SDR1 PE=1 SV=1	all0352	134	5e-31	COG1028	Dehydrogenases with different specificities (related to short-chain alcohol dehydrogenases)	K15095	5e-119	427	pop:POPTR_644424	(+)-neomenthol dehydrogenase [EC:1.1.1.208]	-	-	-
Unigene0001662	365	11	1.6352	0	0	--	--	--	--	--	--	--	--	--	--	--	--	--	--	--	--	--	--	-	-	-
Unigene0001663	343	7	1.1074	0	0	--	--	--	--	--	--	--	--	--	--	--	--	--	--	--	--	--	--	-	-	-
Unigene0001664	1453	0	0	0	0	gi|60476854|gb|AAX21543.1|	476	1e-133	Ca(2+)-dependent DNase [Populus tomentosa]	sp|Q39635|Y38K_CORSE	438	6e-122	Uncharacterized 38.1 kDa protein OS=Corydalis sempervirens PE=2 SV=1	NMB1510	85.1	3e-16	COG1525	Micrococcal nuclease (thermonuclease) homologs	--	--	--	--	--	-	-	-
Unigene0001665	215	0	0	0	0	gi|255559589|ref|XP_002520814.1|	52.4	3e-06	hypothetical protein RCOM_0688330 [Ricinus communis]	--	--	--	--	--	--	--	--	--	--	--	--	--	--	-	GO:0005488//binding	-
Unigene0001666	215	2	0.5047	0	0	gi|255559589|ref|XP_002520814.1|	52	4e-06	hypothetical protein RCOM_0688330 [Ricinus communis]	--	--	--	--	--	--	--	--	--	--	--	--	--	--	-	GO:0005488//binding	-
Unigene0001667	2331	77	1.7924	45	0.9251	gi|60476854|gb|AAX21543.1|	485	1e-135	Ca(2+)-dependent DNase [Populus tomentosa]	sp|Q39635|Y38K_CORSE	446	4e-124	Uncharacterized 38.1 kDa protein OS=Corydalis sempervirens PE=2 SV=1	NMB1510	85.5	4e-16	COG1525	Micrococcal nuclease (thermonuclease) homologs	--	--	--	--	--	-	-	-
Unigene0001668	1159	462	21.6292	315	13.0242	gi|218117848|dbj|BAH03301.1|	469	1e-131	L-galactose-1-phosphate phosphatase [Prunus persica]	sp|Q9M8S8|VTC4_ARATH	446	1e-124	Inositol-phosphate phosphatase OS=Arabidopsis thaliana GN=VTC4 PE=1 SV=1	all2917	183	6e-46	COG0483	Archaeal fructose-1,6-bisphosphatase and related enzymes of inositol monophosphatase family	K10047	1e-133	476	rcu:RCOM_1144730	inositol-phosphate phosphatase / L-galactose 1-phosphate phosphatase [EC:3.1.3.25 3.1.3.-]	-	-	-
Unigene0001669	1286	66	2.7847	53	1.975	--	--	--	--	--	--	--	--	--	--	--	--	--	--	--	--	--	--	-	-	-
Unigene0001670	2131	45	1.1458	47	1.0569	gi|225430210|ref|XP_002282464.1|	634	1e-180	PREDICTED: pentatricopeptide repeat-containing protein At2g25580 [Vitis vinifera]	sp|Q9SUU7|PP346_ARATH	454	2e-126	Pentatricopeptide repeat-containing protein At4g32450, mitochondrial OS=Arabidopsis thaliana GN=PCMP-H63 PE=2 SV=1	--	--	--	--	--	--	--	--	--	--	-	-	-
Unigene0001671	1066	63	3.2067	41	1.8431	gi|224136574|ref|XP_002326894.1|	130	4e-29	NAC domain protein, IPR003441 [Populus trichocarpa]	--	--	--	--	--	--	--	--	--	--	--	--	--	--	-	-	-
Unigene0001672	448	33	3.9968	30	3.209	gi|224136574|ref|XP_002326894.1|	71.2	6e-12	NAC domain protein, IPR003441 [Populus trichocarpa]	--	--	--	--	--	--	--	--	--	--	--	--	--	--	-	-	-
Unigene0001673	202	5	1.3431	1	0.2372	--	--	--	--	--	--	--	--	--	--	--	--	--	--	--	--	--	--	-	-	-
Unigene0001674	458	76	9.0039	75	7.8473	gi|508706264|gb|EOX98160.1|	173	1e-42	2-oxoglutarate and Fe(II)-dependent oxygenase superfamily protein [Theobroma cacao]	sp|Q7XZQ7|FL3H_PETCR	73.9	4e-13	Flavanone 3-dioxygenase OS=Petroselinum crispum GN=FHT PE=1 SV=1	YPO1316	57.4	1e-08	COG3491	Isopenicillin N synthase and related dioxygenases	--	--	--	--	--	GO:0008152//metabolic process	GO:0046914//transition metal ion binding;GO:0016705//oxidoreductase activity, acting on paired donors, with incorporation or reduction of molecular oxygen;GO:0016701//oxidoreductase activity, acting on single donors with incorporation of molecular oxygen	-
Unigene0001675	553	70	6.8684	74	6.4126	gi|508706264|gb|EOX98160.1|	313	2e-84	2-oxoglutarate and Fe(II)-dependent oxygenase superfamily protein [Theobroma cacao]	sp|D4N501|DIOX2_PAPSO	140	4e-33	Probable 2-oxoglutarate/Fe(II)-dependent dioxygenase OS=Papaver somniferum GN=DIOX2 PE=2 SV=1	PA4191	114	8e-26	COG3491	Isopenicillin N synthase and related dioxygenases	--	--	--	--	--	GO:0051553	GO:0046914//transition metal ion binding;GO:0016706//oxidoreductase activity, acting on paired donors, with incorporation or reduction of molecular oxygen, 2-oxoglutarate as one donor, and incorporation of one atom each of oxygen into both donors;GO:0016701//oxidoreductase activity, acting on single donors with incorporation of molecular oxygen	-
Unigene0001676	213	3	0.7642	0	0	--	--	--	--	--	--	--	--	--	--	--	--	--	--	--	--	--	--	-	-	-
Unigene0001677	1195	85	3.8595	82	3.2883	gi|224132502|ref|XP_002328301.1|	191	2e-47	GATA zinc finger protein regulating nitrogen assimilation [Populus trichocarpa]	sp|Q6DBP8|GAT11_ARATH	180	2e-44	GATA transcription factor 11 OS=Arabidopsis thaliana GN=GATA11 PE=2 SV=1	YMR136w	56.6	8e-08	COG5641	GATA Zn-finger-containing transcription factor	--	--	--	--	--	-	GO:0005488//binding	-
Unigene0001678	211	3	0.7715	4	0.9085	--	--	--	--	--	--	--	--	--	--	--	--	--	--	--	--	--	--	-	-	-
Unigene0001679	1087	16	0.7987	10	0.4409	gi|212722772|ref|NP_001131970.1|	430	1e-119	COV1-like protein isoform 1 [Zea mays]	--	--	--	--	mll0832	97.4	4e-20	COG2928	Uncharacterized conserved protein	--	--	--	--	--	-	-	-
Unigene0001680	353	4	0.6148	0	0	gi|18400825|ref|NP_564483.1|	100	1e-20	like COV 2 protein [Arabidopsis thaliana]	--	--	--	--	--	--	--	--	--	--	--	--	--	--	GO:0010051//xylem and phloem pattern formation	-	GO:0043231//intracellular membrane-bounded organelle
Unigene0001681	368	47	6.93	41	5.339	--	--	--	--	--	--	--	--	--	--	--	--	--	--	--	--	--	--	-	-	-
Unigene0001682	440	3	0.37	0	0	--	--	--	--	--	--	--	--	--	--	--	--	--	--	--	--	--	--	-	-	-
Unigene0001683	639	5	0.4246	2	0.15	--	--	--	--	--	--	--	--	--	--	--	--	--	--	--	--	--	--	-	-	-
Unigene0001684	322	6	1.0111	0	0	gi|508703799|gb|EOX95695.1|	98.6	4e-20	ENTH/VHS [Theobroma cacao]	sp|Q9M358|UVSSA_ARATH	84.7	2e-16	UV-stimulated scaffold protein A homolog OS=Arabidopsis thaliana GN=At3g61800 PE=3 SV=1	--	--	--	--	--	--	--	--	--	--	-	-	-
Unigene0001685	1583	77	2.6393	98	2.9667	gi|508721419|gb|EOY13316.1|	622	1e-176	Tubby like protein 7 isoform 1 [Theobroma cacao]	sp|Q93VI8|TLP7_ARATH	570	8e-162	Tubby-like F-box protein 7 OS=Arabidopsis thaliana GN=TULP7 PE=2 SV=1	--	--	--	--	--	--	--	--	--	--	-	-	-
Unigene0001686	624	128	11.1303	55	4.2238	gi|508710425|gb|EOY02322.1|	207	1e-52	Nodulin MtN21 /EamA-like transporter family protein isoform 2, partial [Theobroma cacao]	sp|Q94JU2|WTR18_ARATH	186	1e-46	WAT1-related protein At3g28050 OS=Arabidopsis thaliana GN=At3g28050 PE=2 SV=1	--	--	--	--	--	--	--	--	--	--	-	-	-
Unigene0001687	994	83	4.5308	31	1.4945	gi|508710424|gb|EOY02321.1|	314	2e-84	Nodulin MtN21 /EamA-like transporter family protein isoform 1 [Theobroma cacao]	sp|Q94JU2|WTR18_ARATH	264	9e-70	WAT1-related protein At3g28050 OS=Arabidopsis thaliana GN=At3g28050 PE=2 SV=1	--	--	--	--	--	--	--	--	--	--	-	-	-
Unigene0001688	250	15	3.2556	10	1.9168	gi|76262490|gb|ABA41395.1|	54.3	8e-07	pherophorin-V1 protein precursor [Volvox carteri f. nagariensis]	sp|P21997|SSGP_VOLCA	52.4	9e-07	Sulfated surface glycoprotein 185 OS=Volvox carteri PE=1 SV=1	CC3494_1	48.1	4e-06	COG3637	Opacity protein and related surface antigens	--	--	--	--	--	-	GO:0005488//binding	-
Unigene0001689	546	25	2.4844	23	2.0186	--	--	--	--	--	--	--	--	--	--	--	--	--	--	--	--	--	--	-	-	-
Unigene0001690	299	4	0.7259	1	0.1603	gi|449501130|ref|XP_004161285.1|	57	1e-07	PREDICTED: uncharacterized LOC101210898 [Cucumis sativus]	--	--	--	--	--	--	--	--	--	--	--	--	--	--	-	-	GO:0016020//membrane
Unigene0001691	1843	123	3.6213	74	1.9241	gi|508776826|gb|EOY24082.1|	977	0	S-adenosyl-L-methionine-dependent methyltransferases superfamily protein [Theobroma cacao]	sp|Q94EJ6|PMTE_ARATH	884	0	Probable methyltransferase PMT14 OS=Arabidopsis thaliana GN=At4g18030 PE=1 SV=1	--	--	--	--	--	--	--	--	--	--	GO:0008152//metabolic process	GO:0016741	GO:0016020//membrane;GO:0005618//cell wall;GO:0043231//intracellular membrane-bounded organelle
Unigene0001692	385	0	0	1	0.1245	--	--	--	--	--	--	--	--	--	--	--	--	--	--	--	--	--	--	-	-	-
Unigene0001693	739	17	1.2482	17	1.1024	gi|289466351|gb|ADC94861.1|	257	2e-67	HSP transcription factor [Vitis pseudoreticulata]	sp|Q9T0D3|HFB2B_ARATH	251	4e-66	Heat stress transcription factor B-2b OS=Arabidopsis thaliana GN=HSFB2B PE=2 SV=1	YGL073w	94.4	2e-19	COG5169	Heat shock transcription factor	--	--	--	--	--	GO:0009743//response to carbohydrate stimulus;GO:0006355//regulation of transcription, DNA-dependent;GO:0023051//regulation of signaling;GO:0010921//regulation of phosphatase activity	GO:0001071//nucleic acid binding transcription factor activity;GO:0003677//DNA binding;GO:0019212//phosphatase inhibitor activity	GO:0043231//intracellular membrane-bounded organelle
Unigene0001694	1595	103	3.5039	89	2.674	gi|508724729|gb|EOY16626.1|	682	0	Plant glycogenin-like starch initiation protein 2 isoform 1 [Theobroma cacao]	sp|Q9LSB1|GUX1_ARATH	571	6e-162	UDP-glucuronate:xylan alpha-glucuronosyltransferase 1 OS=Arabidopsis thaliana GN=GUX1 PE=2 SV=1	SMc04081	97.4	6e-20	COG5597	Alpha-N-acetylglucosamine transferase	K00750	0	681	rcu:RCOM_0138290	glycogenin glucosyltransferase [EC:2.4.1.186]	-	GO:0035251//UDP-glucosyltransferase activity	-
Unigene0001695	722	20	1.5031	13	0.8628	--	--	--	--	--	--	--	--	--	--	--	--	--	--	--	--	--	--	-	-	-
Unigene0001696	2228	3	0.0731	2	0.043	gi|508722651|gb|EOY14548.1|	1197	0	Calcineurin-like metallo-phosphoesterase superfamily protein isoform 1 [Theobroma cacao]	--	--	--	--	--	--	--	--	--	--	--	--	--	--	-	GO:0003824//catalytic activity	-
Unigene0001697	411	19	2.5084	12	1.3991	gi|449457167|ref|XP_004146320.1|	136	1e-31	PREDICTED: ABC transporter I family member 6, chloroplastic-like [Cucumis sativus]	sp|Q9CAF5|AB6I_ARATH	129	8e-30	ABC transporter I family member 6, chloroplastic OS=Arabidopsis thaliana GN=ABCI6 PE=1 SV=1	YPO2402	94	7e-20	COG0396	ABC-type transport system involved in Fe-S cluster assembly, ATPase component	K09013	2e-31	134	vvi:100243733	Fe-S cluster assembly ATP-binding protein	GO:0009668;GO:0009207;GO:0051234//establishment of localization;GO:0031163;GO:0003006//developmental process involved in reproduction	GO:0042626//ATPase activity, coupled to transmembrane movement of substances;GO:0032559	GO:0009532//plastid stroma
Unigene0001698	498	4	0.4358	2	0.1925	gi|508727483|gb|EOY19380.1|	55.8	4e-07	White-brown-complex ABC transporter family isoform 5 [Theobroma cacao]	sp|Q9CAF5|AB6I_ARATH	54.3	4e-07	ABC transporter I family member 6, chloroplastic OS=Arabidopsis thaliana GN=ABCI6 PE=1 SV=1	alr2493	47.8	9e-06	COG0396	ABC-type transport system involved in Fe-S cluster assembly, ATPase component	K09013	9e-08	55.8	vvi:100243733	Fe-S cluster assembly ATP-binding protein	GO:0009668;GO:0031163;GO:0003006//developmental process involved in reproduction	GO:0042626//ATPase activity, coupled to transmembrane movement of substances;GO:0000166//nucleotide binding	GO:0009532//plastid stroma
Unigene0001699	1811	739	22.1415	469	12.4102	gi|470102605|ref|XP_004287742.1|	490	1e-137	PREDICTED: adipocyte plasma membrane-associated protein-like [Fragaria vesca subsp. vesca]	sp|Q5ZIF1|APMAP_CHICK	156	4e-37	Adipocyte plasma membrane-associated protein OS=Gallus gallus GN=APMAP PE=2 SV=1	PA1293	232	2e-60	COG3386	Gluconolactonase	--	--	--	--	--	-	-	-
Unigene0001700	475	11	1.2566	9	0.908	--	--	--	--	--	--	--	--	--	--	--	--	--	--	--	--	--	--	-	-	-
Unigene0001701	676	14	1.1237	7	0.4962	gi|356541036|ref|XP_003538989.1|	135	8e-31	PREDICTED: proline-rich receptor-like protein kinase PERK13-like [Glycine max]	--	--	--	--	--	--	--	--	--	--	--	--	--	--	GO:0050896//response to stimulus;GO:0006464//protein modification process;GO:0006796//phosphate-containing compound metabolic process	GO:0004672//protein kinase activity;GO:0032559	-
Unigene0001702	327	9	1.4934	4	0.5862	gi|508781364|gb|EOY28620.1|	61.2	7e-09	Pectinesterase/pectinesterase inhibitor, putative [Theobroma cacao]	--	--	--	--	--	--	--	--	--	K01051	2e-07	54.3	pop:POPTR_822767	pectinesterase [EC:3.1.1.11]	-	-	-
Unigene0001703	965	0	0	0	0	gi|334182742|ref|NP_173577.2|	142	9e-33	zinc finger CCCH domain-containing protein [Arabidopsis thaliana]	sp|Q3ED78|C3H7_ARATH	142	3e-33	Zinc finger CCCH domain-containing protein 7 OS=Arabidopsis thaliana GN=At1g21570 PE=1 SV=1	--	--	--	--	--	--	--	--	--	--	-	GO:0046914//transition metal ion binding	-
Unigene0001704	888	1	0.0611	0	0	gi|334182742|ref|NP_173577.2|	142	8e-33	zinc finger CCCH domain-containing protein [Arabidopsis thaliana]	sp|Q3ED78|C3H7_ARATH	142	2e-33	Zinc finger CCCH domain-containing protein 7 OS=Arabidopsis thaliana GN=At1g21570 PE=1 SV=1	--	--	--	--	--	--	--	--	--	--	-	GO:0046914//transition metal ion binding	-
Unigene0001705	564	13	1.2507	5	0.4248	gi|334182742|ref|NP_173577.2|	125	7e-28	zinc finger CCCH domain-containing protein [Arabidopsis thaliana]	sp|Q3ED78|C3H7_ARATH	125	2e-28	Zinc finger CCCH domain-containing protein 7 OS=Arabidopsis thaliana GN=At1g21570 PE=1 SV=1	--	--	--	--	--	--	--	--	--	--	-	GO:0046914//transition metal ion binding	-
Unigene0001706	853	9	0.5725	9	0.5056	gi|334182742|ref|NP_173577.2|	195	1e-48	zinc finger CCCH domain-containing protein [Arabidopsis thaliana]	sp|Q3ED78|C3H7_ARATH	195	3e-49	Zinc finger CCCH domain-containing protein 7 OS=Arabidopsis thaliana GN=At1g21570 PE=1 SV=1	SPBC337.12	66.6	5e-11	COG5084	Cleavage and polyadenylation specificity factor (CPSF) Clipper subunit and related makorin family Zn-finger proteins	--	--	--	--	--	-	GO:0046914//transition metal ion binding	-
Unigene0001707	384	7	0.9891	1	0.1248	--	--	--	--	--	--	--	--	--	--	--	--	--	--	--	--	--	--	-	-	-
Unigene0001708	238	5	1.1399	7	1.4094	--	--	--	--	--	--	--	--	--	--	--	--	--	--	--	--	--	--	-	-	-
Unigene0001709	204	4	1.0639	3	0.7047	--	--	--	--	--	--	--	--	--	--	--	--	--	--	--	--	--	--	-	-	-
Unigene0001710	380	3	0.4284	3	0.3783	gi|508712407|gb|EOY04304.1|	150	1e-35	BED zinc finger,hAT family dimerization domain isoform 3, partial [Theobroma cacao]	--	--	--	--	--	--	--	--	--	--	--	--	--	--	-	-	-
Unigene0001711	1802	578	17.4042	606	16.1155	gi|508774603|gb|EOY21859.1|	367	1e-100	RNA-binding family protein with retrovirus zinc finger-like domain isoform 1 [Theobroma cacao]	sp|Q05966|GRP10_BRANA	152	8e-36	Glycine-rich RNA-binding protein 10 OS=Brassica napus GN=GRP10 PE=1 SV=1	SPAC140.02	77	1e-13	COG0724	RNA-binding proteins (RRM domain)	--	--	--	--	--	-	GO:0046914//transition metal ion binding;GO:0036094	GO:0043231//intracellular membrane-bounded organelle
Unigene0001712	637	54	4.5998	19	1.4294	--	--	--	--	--	--	--	--	--	--	--	--	--	--	--	--	--	--	-	-	-
Unigene0001713	295	25	4.5983	22	3.5738	--	--	--	--	--	--	--	--	--	--	--	--	--	--	--	--	--	--	-	-	-
Unigene0001714	361	6	0.9018	0	0	gi|470146273|ref|XP_004308751.1|	61.2	7e-09	PREDICTED: NAC domain-containing protein 74-like [Fragaria vesca subsp. vesca]	sp|Q84K00|NAC78_ARATH	55.5	1e-07	NAC domain-containing protein 78 OS=Arabidopsis thaliana GN=NAC078 PE=2 SV=2	--	--	--	--	--	--	--	--	--	--	-	-	-
Unigene0001715	214	1	0.2536	2	0.4479	--	--	--	--	--	--	--	--	--	--	--	--	--	--	--	--	--	--	-	-	-
Unigene0001716	207	8	2.097	4	0.926	gi|495026147|gb|AGL39728.1|	79.3	2e-14	NAC transcription factor 072 [Jatropha curcas]	sp|Q7GCL7|NAC74_ORYSJ	66.2	6e-11	NAC domain-containing protein 74 OS=Oryza sativa subsp. japonica GN=NAC74 PE=2 SV=1	--	--	--	--	--	--	--	--	--	--	-	-	-
Unigene0001717	2978	126	2.2958	130	2.0919	gi|508722759|gb|EOY14656.1|	1541	0	Exocyst complex component sec3A isoform 1 [Theobroma cacao]	sp|Q9SX85|SEC3A_ARATH	1483	0	Exocyst complex component SEC3A OS=Arabidopsis thaliana GN=SEC3A PE=1 SV=1	--	--	--	--	--	--	--	--	--	--	-	-	GO:0044444//cytoplasmic part;GO:0016020//membrane;GO:0043234//protein complex
Unigene0001718	209	5	1.2981	3	0.6879	--	--	--	--	--	--	--	--	--	--	--	--	--	--	--	--	--	--	-	-	-
[truncated: 44,923 more rows]

## Sheet: Table S2
Table S2. The number of unigenes in each functional groups using GO analysis.
[truncated: 42 more rows]

[truncated: 11 more sheets: Table S3, Table S4, Table S5, Table S6, Table S7, Table S8, Figure S1., Figure S2, Figure S3, Figure S4, Figure S5]
